# Supplementary material for: On the Efficiency of the Density Functional Theory (DFT)-Based Computational Protocol for 1H and 13C Nuclear Magnetic Resonance (NMR) Chemical Shifts of Natural Products: Studying the Accuracy of the pecS-n (n = 1, 2) Basis Sets
Source: MDPI journal article supplement (doi:10.3390/ijms241914623), 2023-09-27
Supplement: s1 [file s1]

# *Supplementary Material to Article*

## **On the efficiency of the DFT-based computational protocol for $^1\text{H}$ and $^{13}\text{C}$ NMR chemical shifts of natural products: studying the accuracy of the pecS- $n$ ( $n = 1, 2$ ) basis sets**

*Authors: Yuriy Yu. Rusakov, Valentin A. Semenov and Irina L. Rusakova*

### **Contents**

#### **Basis sets**

|                                                                                                                          |   |
|--------------------------------------------------------------------------------------------------------------------------|---|
| The pecS-1 basis set for carbon atom with newly optimized contraction coefficients of the p-shell (Dalton format) .....  | 3 |
| The pecS-1 basis set for carbon atom with newly optimized contraction coefficients of the p-shell (Gaussian format)..... | 4 |
| The pecS-2 basis set for carbon atom with newly optimized contraction coefficients of the p-shell (Dalton format) .....  | 5 |
| The pecS-2 basis set for carbon atom with newly optimized contraction coefficients of the p-shell (Gaussian format)..... | 6 |

#### **Equilibrium Geometries**

|                                                      |    |
|------------------------------------------------------|----|
| 10'-Hydroxyusambarensine (1) .....                   | 7  |
| 2-2-Di(3-indolyl)-3-indolone (2) .....               | 8  |
| Acantholactam (3).....                               | 9  |
| Alasmontamine A (4) .....                            | 11 |
| Anabsinthin (5).....                                 | 16 |
| Asperlicin (6).....                                  | 18 |
| Chetomin (7).....                                    | 19 |
| Diosgen-in-3-O- $\beta$ -D-glucopyranoside (8) ..... | 21 |

|                                                                                                                                                                                                     |    |
|-----------------------------------------------------------------------------------------------------------------------------------------------------------------------------------------------------|----|
| Itoaic acid (9).....                                                                                                                                                                                | 24 |
| Jaspamide Q (10).....                                                                                                                                                                               | 26 |
| Korundamine A (11).....                                                                                                                                                                             | 28 |
| Limonin (12).....                                                                                                                                                                                   | 30 |
| Matopensine (13).....                                                                                                                                                                               | 32 |
| Mulberrofuran G (14).....                                                                                                                                                                           | 35 |
| 1 $\alpha$ ,8 $\beta$ ,9 $\beta$ ,14 $\alpha$ ,15 $\beta$ -Pentaacetoxy-3 $\beta$ -benzoyloxy-7-oxojatropha-5,12-diene (15) .....                                                                   | 36 |
| Pedunculagin (16) .....                                                                                                                                                                             | 39 |
| Phyllaemblicin B (17) .....                                                                                                                                                                         | 41 |
| Physalin D (18).....                                                                                                                                                                                | 43 |
| Procyanidin B2 (19) .....                                                                                                                                                                           | 45 |
| Strychnine (20).....                                                                                                                                                                                | 47 |
| Strychnobaillonine (21).....                                                                                                                                                                        | 48 |
| Terrequinone A (22).....                                                                                                                                                                            | 50 |
| Viomycin (23).....                                                                                                                                                                                  | 52 |
| <b>Table S1.</b> Calculated $^1\text{H}$ NMR shielding constants, together with scaled and experimental chemical shifts – the GIAO-DFT(PBE0) calculations with the first-level basis sets. ....     | 54 |
| <b>Table S2.</b> Calculated $^1\text{H}$ NMR shielding constants, together with scaled and experimental chemical shifts – the GIAO-DFT(PBE0) calculations with the second-level basis sets .....    | 68 |
| <b>Table S3.</b> Calculated $^{13}\text{C}$ NMR shielding constants, together with scaled and experimental chemical shifts – the GIAO-DFT(PBE0) calculations with the first-level basis sets .....  | 83 |
| <b>Table S4.</b> Calculated $^{13}\text{C}$ NMR shielding constants, together with scaled and experimental chemical shifts – the GIAO-DFT(PBE0) calculations with the second-level basis sets ..... | 99 |

**The pecS-1 basis set for carbon atom with newly optimized contraction coefficients of the *p*-shell (Dalton format)**

\$ C

a 6

\$ s functions

7 4 0

|              |            |            |            |            |
|--------------|------------|------------|------------|------------|
| 1.158704E+03 | 6.1043E-03 | 1.0143E-03 | 0.00000000 | 0.00000000 |
| 1.744210E+02 | 4.4530E-02 | 8.1051E-03 | 0.00000000 | 0.00000000 |
| 4.064338E+01 | 1.8738E-01 | 3.1628E-02 | 0.00000000 | 0.00000000 |
| 1.141525E+01 | 4.7151E-01 | 1.1437E-01 | 0.00000000 | 0.00000000 |
| 3.439092E+00 | 4.3067E-01 | 1.1469E-01 | 0.00000000 | 0.00000000 |
| 3.002996E-01 | 0.00000000 | 0.00000000 | 1.00000000 | 0.00000000 |
| 5.973462E-02 | 0.00000000 | 0.00000000 | 0.00000000 | 1.00000000 |

\$ p functions

5 4 0

|              |            |            |            |            |
|--------------|------------|------------|------------|------------|
| 3.880432E+01 | 3.8015E-03 | 0.00000000 | 0.00000000 | 0.00000000 |
| 6.201621E+00 | 4.3304E-02 | 0.00000000 | 0.00000000 | 0.00000000 |
| 1.332637E+00 | 0.00000000 | 1.00000000 | 0.00000000 | 0.00000000 |
| 3.106991E-01 | 0.00000000 | 0.00000000 | 1.00000000 | 0.00000000 |
| 8.352061E-02 | 0.00000000 | 0.00000000 | 0.00000000 | 1.00000000 |

\$ d functions

1 1 0

|              |            |
|--------------|------------|
| 4.584126E-01 | 1.00000000 |
|--------------|------------|

**The pecS-1 basis set for carbon atom with newly optimized contraction coefficients of the  $p$ -shell (Gaussian format)**

```

C 0
S 5 1.00
1.158704E+03      6.1043E-03
1.744210E+02      4.4530E-02
4.064338E+01      1.8738E-01
1.141525E+01      4.7151E-01
3.439092E+00      4.3067E-01
S 5 1.00
1.158704E+03      1.0143E-03
1.744210E+02      8.1051E-03
4.064338E+01      3.1628E-02
1.141525E+01      1.1437E-01
3.439092E+00      1.1469E-01
S 1 1.00
3.002996E-01      0.1000E+01
S 1 1.00
5.973462E-02      0.1000E+01
P 2 1.00
3.880432E+01      3.8015E-03
6.201621E+00      4.3304E-02
P 1 1.00
1.332637E+00      0.1000E+01
P 1 1.00
3.106991E-01      0.1000E+01
P 1 1.00
8.352061E-02      0.1000E+01
D 1 1.00
4.584126E-01      0.1000E+01
****

```

**The pecS-2 basis set for carbon atom with newly optimized contraction coefficients of the *p*-shell (Dalton format)**

\$ C

a 6

\$ s functions

10 5 0

|              |            |            |            |            |            |
|--------------|------------|------------|------------|------------|------------|
| 7.811885E+03 | 5.7075E-04 | 1.0361E-04 | 0.00000000 | 0.00000000 | 0.00000000 |
| 1.168486E+03 | 4.3473E-03 | 7.7592E-04 | 0.00000000 | 0.00000000 | 0.00000000 |
| 2.735860E+02 | 2.1213E-02 | 3.9293E-03 | 0.00000000 | 0.00000000 | 0.00000000 |
| 7.954210E+01 | 7.9825E-02 | 1.4569E-02 | 0.00000000 | 0.00000000 | 0.00000000 |
| 2.613539E+01 | 2.2806E-01 | 4.6979E-02 | 0.00000000 | 0.00000000 | 0.00000000 |
| 9.217097E+00 | 4.3136E-01 | 9.9114E-02 | 0.00000000 | 0.00000000 | 0.00000000 |
| 3.390089E+00 | 3.5137E-01 | 1.5321E-01 | 0.00000000 | 0.00000000 | 0.00000000 |
| 1.045814E+00 | 0.00000000 | 0.00000000 | 1.00000000 | 0.00000000 | 0.00000000 |
| 3.150044E-01 | 0.00000000 | 0.00000000 | 0.00000000 | 1.00000000 | 0.00000000 |
| 1.155406E-01 | 0.00000000 | 0.00000000 | 0.00000000 | 0.00000000 | 1.00000000 |

\$ p functions

7 5 0

|              |            |            |            |            |            |
|--------------|------------|------------|------------|------------|------------|
| 1.844063E+02 | 2.5812E-04 | 0.00000000 | 0.00000000 | 0.00000000 | 0.00000000 |
| 3.098346E+01 | 3.5919E-03 | 0.00000000 | 0.00000000 | 0.00000000 | 0.00000000 |
| 7.830746E+00 | 2.4201E-02 | 0.00000000 | 0.00000000 | 0.00000000 | 0.00000000 |
| 2.308071E+00 | 0.00000000 | 1.00000000 | 0.00000000 | 0.00000000 | 0.00000000 |
| 7.525987E-01 | 0.00000000 | 0.00000000 | 1.00000000 | 0.00000000 | 0.00000000 |
| 2.530275E-01 | 0.00000000 | 0.00000000 | 0.00000000 | 1.00000000 | 0.00000000 |
| 8.574535E-02 | 0.00000000 | 0.00000000 | 0.00000000 | 0.00000000 | 1.00000000 |

\$ d functions

2 2 0

|              |            |            |
|--------------|------------|------------|
| 1.566238E+00 | 1.00000000 | 0.00000000 |
| 3.508371E-01 | 0.00000000 | 1.00000000 |

\$ f functions

1 1 0

|              |            |
|--------------|------------|
| 1.148503E+00 | 1.00000000 |
|--------------|------------|

## The pecS-2 basis set for carbon atom with newly optimized contraction coefficients of the $p$ -shell (Gaussian format)

```

C 0
S 7 1.00
7.811885E+03      5.7075E-04
1.168486E+03      4.3473E-03
2.735860E+02      2.1213E-02
7.954210E+01      7.9825E-02
2.613539E+01      2.2806E-01
9.217097E+00      4.3136E-01
3.390089E+00      3.5137E-01
S 7 1.00
7.811885E+03      1.0361E-04
1.168486E+03      7.7592E-04
2.735860E+02      3.9293E-03
7.954210E+01      1.4569E-02
2.613539E+01      4.6979E-02
9.217097E+00      9.9114E-02
3.390089E+00      1.5321E-01
S 1 1.00
1.045814E+00      0.1000E+01
S 1 1.00
3.150044E-01      0.1000E+01
S 1 1.00
1.155406E-01      0.1000E+01
P 3 1.00
1.844063E+02      2.5812E-04
3.098346E+01      3.5919E-03
7.830746E+00      2.4201E-02
P 1 1.00
2.308071E+00      0.1000E+01
P 1 1.00
7.525987E-01      0.1000E+01
P 1 1.00
2.530275E-01      0.1000E+01
P 1 1.00
8.574535E-02      0.1000E+01
D 1 1.00
1.566238E+00      0.1000E+01
D 1 1.00
3.508371E-01      0.1000E+01
F 1 1.00
1.148503E+00      0.1000E+01
****

```

Equilibrium geometry of 10'-hydroxyusambarensine (1)

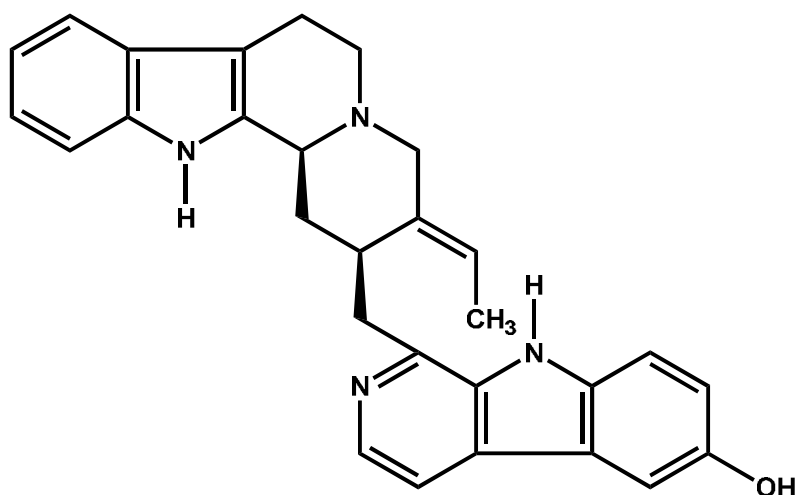

|   |           |           |           |
|---|-----------|-----------|-----------|
| O | -6.394331 | 3.027550  | 0.537892  |
| N | 3.301681  | -1.346042 | 0.086243  |
| N | 1.494289  | 1.775900  | -0.740848 |
| N | -2.058264 | -2.998707 | -1.752602 |
| N | -2.427560 | -0.724545 | 1.109050  |
| C | 2.227833  | -0.657599 | -0.630014 |
| C | 0.871484  | -1.119192 | -0.110473 |
| C | 0.708798  | -2.636136 | -0.266311 |
| C | 2.443630  | 0.813684  | -0.486650 |
| C | 3.206613  | -2.788501 | -0.131247 |
| C | 4.617293  | -0.834178 | -0.291364 |
| C | 1.892856  | -3.321182 | 0.379537  |
| C | 3.610171  | 1.397999  | -0.100066 |
| C | 4.822825  | 0.588499  | 0.223173  |
| C | -0.659313 | -3.113844 | 0.225724  |
| C | 3.385501  | 2.814317  | -0.102680 |
| C | 2.046188  | 3.013085  | -0.513413 |
| C | 1.783415  | -4.268274 | 1.308078  |
| C | -1.786383 | -2.498329 | -0.554958 |
| C | 4.177324  | 3.929157  | 0.194415  |
| C | -2.526690 | -1.413465 | -0.076400 |
| C | 1.488309  | 4.283766  | -0.629902 |
| C | 2.878703  | -5.003666 | 2.017410  |
| C | -3.557534 | -0.848762 | -0.850733 |
| C | 3.627028  | 5.190819  | 0.079053  |
| C | 2.294451  | 5.365318  | -0.329122 |
| C | -4.106760 | 0.237831  | -0.077812 |
| C | -3.377722 | 0.276895  | 1.123561  |
| C | -3.819119 | -1.397720 | -2.103348 |
| C | -3.040339 | -2.465816 | -2.499184 |
| C | -5.135337 | 1.155202  | -0.308814 |
| C | -3.658578 | 1.223335  | 2.107007  |
| C | -5.409392 | 2.089335  | 0.668121  |
| C | -4.675609 | 2.121401  | 1.865367  |
| H | 2.278733  | -0.915783 | -1.705107 |

|   |           |           |           |
|---|-----------|-----------|-----------|
| H | 0.079218  | -0.608053 | -0.659976 |
| H | 0.784221  | -0.842591 | 0.943658  |
| H | 0.757882  | -2.852632 | -1.340524 |
| H | 3.294726  | -3.018964 | -1.207776 |
| H | 4.048147  | -3.258338 | 0.367420  |
| H | 4.736178  | -0.851792 | -1.386466 |
| H | 5.370766  | -1.497791 | 0.128891  |
| H | 5.001382  | 0.568023  | 1.300490  |
| H | 5.714138  | 1.016168  | -0.238005 |
| H | -0.764930 | -2.894498 | 1.290278  |
| H | -0.727170 | -4.194633 | 0.109504  |
| H | 0.551093  | 1.608350  | -1.044305 |
| H | 0.787190  | -4.571906 | 1.607418  |
| H | 5.204377  | 3.802867  | 0.509866  |
| H | 0.462819  | 4.417758  | -0.944170 |
| H | 3.874897  | -4.674550 | 1.740167  |
| H | 2.772524  | -4.885610 | 3.096135  |
| H | 2.808968  | -6.072813 | 1.813542  |
| H | 4.227366  | 6.060546  | 0.305176  |
| H | 1.891666  | 6.364872  | -0.409689 |
| H | -1.775853 | -0.912896 | 1.849813  |
| H | -4.596315 | -1.012706 | -2.746903 |
| H | -3.203940 | -2.929417 | -3.462797 |
| H | -5.704604 | 1.135177  | -1.229115 |
| H | -3.100089 | 1.255387  | 3.030893  |
| H | -4.928830 | 2.872321  | 2.599773  |
| H | -6.838818 | 2.922974  | -0.307951 |

Equilibrium geometry of 2-2-di(3-indolyl)-3-indolone (2)

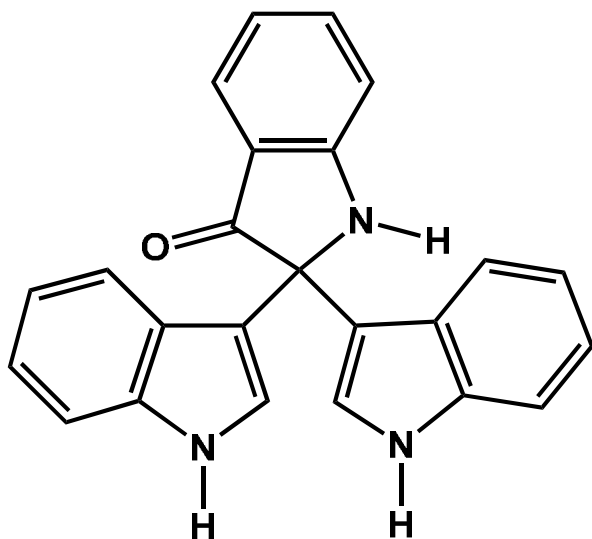

|   |           |           |           |
|---|-----------|-----------|-----------|
| C | -1.193205 | -3.837036 | -1.284155 |
| C | -0.576609 | -2.537599 | -1.244483 |
| C | -1.589002 | -1.628975 | -1.130284 |
| C | -2.585644 | -3.631839 | -1.191500 |
| N | -2.795024 | -2.278982 | -1.097471 |



|   |           |           |           |
|---|-----------|-----------|-----------|
| C | -3.494560 | -4.688643 | -1.197118 |
| C | -2.983784 | -5.966307 | -1.302311 |
| C | -1.600130 | -6.194393 | -1.392531 |
| C | -0.702827 | -5.146363 | -1.380177 |
| C | 0.900259  | -2.271252 | -1.361728 |
| C | 1.684685  | -2.823542 | -0.210940 |
| C | 3.116328  | -2.815573 | -0.079180 |
| C | 3.413137  | -3.376708 | 1.180834  |
| N | 2.219403  | -3.701344 | 1.776990  |
| C | 1.188488  | -3.362721 | 0.939141  |
| C | 4.168585  | -2.379541 | -0.894066 |
| C | 5.464006  | -2.517508 | -0.439155 |
| C | 5.736906  | -3.086601 | 0.816259  |
| C | 4.720324  | -3.522367 | 1.641584  |
| C | 1.118815  | -0.736906 | -1.489947 |
| C | 1.520299  | -0.483834 | -2.868911 |
| C | 1.615440  | -1.716317 | -3.520016 |
| N | 1.413305  | -2.768697 | -2.657161 |
| C | 1.769820  | 0.714126  | -3.531990 |
| C | 2.096505  | 0.668631  | -4.872113 |
| C | 2.165452  | -0.568677 | -5.530044 |
| C | 1.930949  | -1.765628 | -4.879910 |
| O | 0.949821  | 0.049619  | -0.588446 |
| H | -1.540031 | -0.555648 | -1.056759 |
| H | -3.690505 | -1.830233 | -1.015051 |
| H | -4.558754 | -4.511315 | -1.120227 |
| H | -3.660900 | -6.809533 | -1.309241 |
| H | -1.235717 | -7.209955 | -1.464692 |
| H | 0.363218  | -5.333736 | -1.424606 |
| H | 2.112934  | -4.121115 | 2.683600  |
| H | 0.164125  | -3.533164 | 1.225583  |
| H | 3.970218  | -1.941493 | -1.864142 |
| H | 6.286811  | -2.183872 | -1.056611 |
| H | 6.763669  | -3.182243 | 1.142323  |
| H | 4.928023  | -3.956672 | 2.610372  |
| H | 1.002891  | -3.615748 | -3.021297 |
| H | 1.697137  | 1.651779  | -2.996644 |
| H | 2.294644  | 1.578287  | -5.420194 |
| H | 2.413828  | -0.588523 | -6.583270 |
| H | 1.997671  | -2.709842 | -5.402319 |

Equilibrium geometry of acantholactam (3)

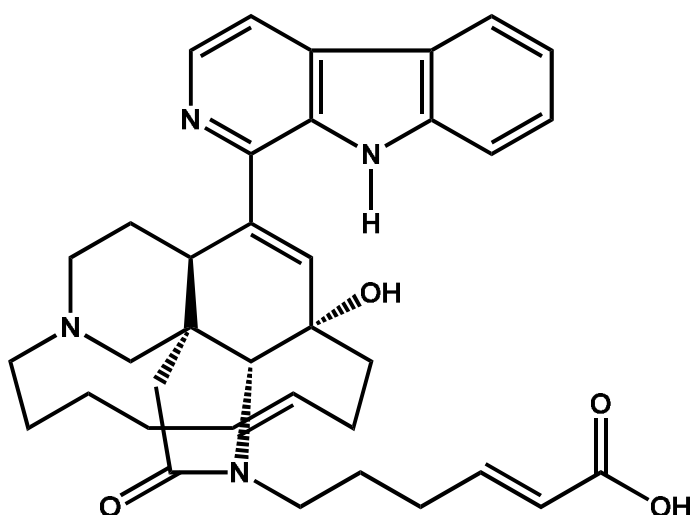

|   |           |           |           |
|---|-----------|-----------|-----------|
| O | 0.011522  | -1.314907 | -2.910697 |
| O | 1.917915  | -4.289869 | -2.082897 |
| O | 6.613205  | 4.071861  | -0.234977 |
| O | 7.366689  | 2.255039  | 0.820447  |
| N | 1.823244  | -2.126410 | -1.332294 |
| N | 1.238886  | -1.432266 | 2.332325  |
| N | -4.084552 | -2.274963 | 0.444987  |
| N | -3.913678 | 1.292539  | -0.448048 |
| C | 0.165299  | -2.282027 | 0.285820  |
| C | 0.854346  | -1.272549 | -0.657724 |
| C | -1.192472 | -1.829581 | 0.826271  |
| C | -0.078433 | -0.567875 | -1.692056 |
| C | 1.101968  | -2.582006 | 1.467418  |
| C | 0.116903  | -3.524169 | -0.609334 |
| C | -1.089556 | -0.837020 | 2.005735  |
| C | -2.048429 | -1.171843 | -0.220926 |
| C | 1.381359  | -3.399615 | -1.441476 |
| C | -1.528683 | -0.564533 | -1.284024 |
| C | -0.017941 | -1.195801 | 3.018841  |
| C | 0.418672  | 0.861327  | -1.963788 |
| C | 2.960710  | -1.617194 | -2.067401 |
| C | 2.383963  | -1.478129 | 3.227208  |
| C | -3.509412 | -1.148260 | 0.038687  |
| C | 0.368781  | 1.800748  | -0.739554 |
| C | 3.853550  | -0.759829 | -1.183548 |
| C | 2.868837  | -0.087975 | 3.634750  |
| C | -4.278843 | 0.011435  | -0.104986 |
| C | 3.215984  | 0.794756  | 2.430699  |
| C | 1.692242  | 2.447382  | -0.447344 |
| C | 5.021474  | -0.146294 | -1.959275 |
| C | -5.662216 | -0.014645 | 0.155716  |
| C | 2.050506  | 1.665897  | 1.948735  |
| C | 2.389796  | 2.396873  | 0.684725  |
| C | -5.403324 | -2.308482 | 0.680157  |
| C | -6.145449 | 1.330166  | -0.046182 |
| C | -6.240088 | -1.216509 | 0.548987  |
| C | -5.025111 | 2.104230  | -0.408647 |
| C | 5.855169  | 0.681473  | -1.042117 |

|   |           |           |           |
|---|-----------|-----------|-----------|
| C | -7.400730 | 1.930114  | 0.055235  |
| C | -5.133630 | 3.468767  | -0.669944 |
| C | 5.913917  | 2.008376  | -1.065447 |
| C | -7.513256 | 3.281566  | -0.203635 |
| C | -6.386935 | 4.038577  | -0.561500 |
| C | 6.706840  | 2.744382  | -0.063366 |
| H | 1.364452  | -0.514012 | -0.064163 |
| H | -1.714000 | -2.720573 | 1.184132  |
| H | 0.698975  | -3.453449 | 2.011919  |
| H | 2.085052  | -2.860116 | 1.089072  |
| H | -0.739362 | -3.502754 | -1.286100 |
| H | 0.102669  | -4.463678 | -0.060533 |
| H | -2.062803 | -0.769564 | 2.493039  |
| H | -0.868286 | 0.155716  | 1.612852  |
| H | -2.186591 | -0.073443 | -1.997256 |
| H | 0.100614  | -0.373307 | 3.723445  |
| H | -0.312971 | -2.086100 | 3.598646  |
| H | -0.177174 | 1.269456  | -2.781879 |
| H | 1.442193  | 0.784432  | -2.334998 |
| H | 2.617144  | -1.046645 | -2.934022 |
| H | 3.506524  | -2.481466 | -2.440879 |
| H | 3.197438  | -1.974102 | 2.695470  |
| H | 2.170064  | -2.083183 | 4.121199  |
| H | -0.615606 | -0.942491 | -3.538154 |
| H | 0.014869  | 1.257571  | 0.134028  |
| H | -0.369002 | 2.584030  | -0.921593 |
| H | 3.275252  | 0.057273  | -0.749536 |
| H | 4.226796  | -1.364371 | -0.353743 |
| H | 3.746272  | -0.224526 | 4.267395  |
| H | 2.123188  | 0.412623  | 4.256600  |
| H | 3.547923  | 0.156478  | 1.607165  |
| H | 4.057189  | 1.447218  | 2.672333  |
| H | 2.114719  | 3.011100  | -1.274067 |
| H | 5.629870  | -0.941826 | -2.394025 |
| H | 4.638338  | 0.467093  | -2.775588 |
| H | 1.816668  | 2.390244  | 2.734881  |
| H | 1.168942  | 1.042605  | 1.820122  |
| H | -2.972774 | 1.597685  | -0.627575 |
| H | 3.338284  | 2.927638  | 0.705753  |
| H | -5.802192 | -3.263121 | 0.995865  |
| H | -7.295588 | -1.302123 | 0.760769  |
| H | 6.409443  | 0.158090  | -0.269239 |
| H | -8.267458 | 1.346163  | 0.331884  |
| H | -4.270306 | 4.056051  | -0.946623 |
| H | 5.378571  | 2.594991  | -1.799223 |
| H | -8.475745 | 3.765975  | -0.131074 |
| H | -6.503052 | 5.094898  | -0.757898 |
| H | 7.144651  | 4.503842  | 0.447538  |

Equilibrium geometry of alasmontamine A (4)

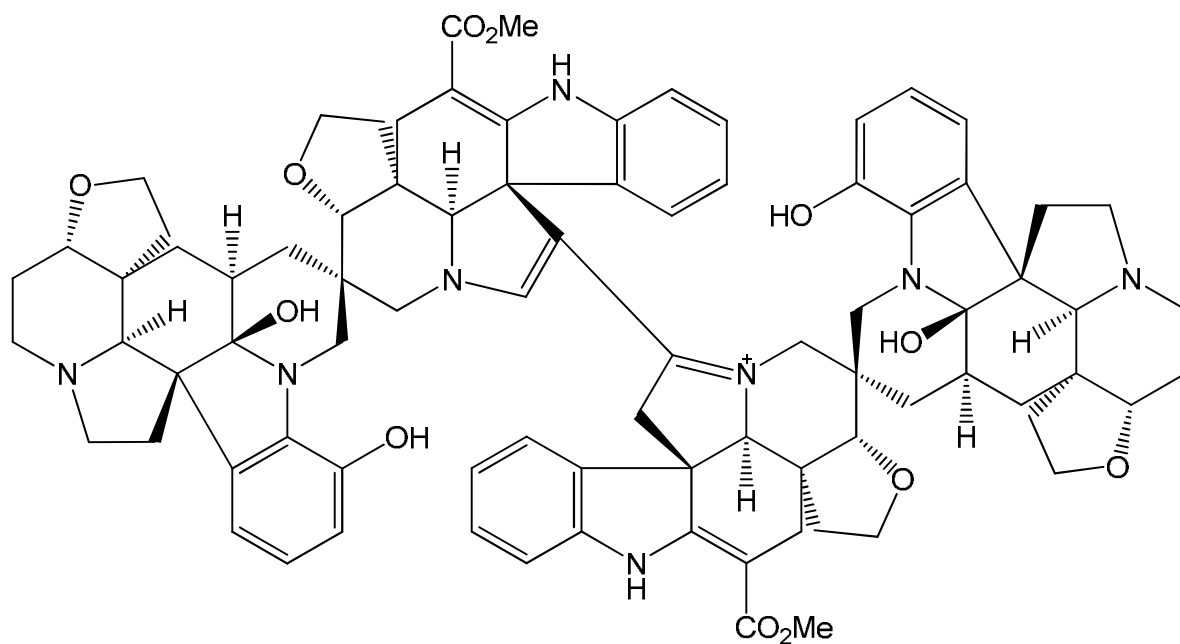

|   |            |           |           |
|---|------------|-----------|-----------|
| N | -6.469236  | -0.974674 | 2.483841  |
| C | -5.993793  | -0.541149 | 1.279537  |
| C | -1.767896  | 1.264250  | -0.604795 |
| N | -2.648759  | 0.327001  | 0.094932  |
| C | -2.574431  | -0.993994 | -0.000847 |
| C | -3.817697  | -1.614627 | 0.569250  |
| C | -4.478135  | -0.462855 | 1.374619  |
| C | -4.239007  | -0.636317 | 2.856495  |
| C | -3.077322  | -0.572441 | 3.610159  |
| C | -3.155101  | -0.844527 | 4.982488  |
| C | -4.377154  | -1.183550 | 5.566640  |
| C | -5.552922  | -1.260039 | 4.811748  |
| C | -5.456906  | -0.979425 | 3.454591  |
| C | -2.510989  | 2.534253  | -1.072824 |
| C | -3.950993  | 2.125250  | -1.450755 |
| C | -6.620978  | -0.183074 | 0.126588  |
| C | -5.755026  | 0.440004  | -0.938723 |
| C | -5.810148  | 3.512329  | -1.038860 |
| C | -5.577631  | 2.682279  | 0.217835  |
| C | -4.787689  | 1.479767  | -0.323530 |
| C | -3.884009  | 0.816329  | 0.735610  |
| C | -8.065118  | -0.238254 | -0.070252 |
| C | -10.148213 | -0.858520 | 0.838669  |
| N | -0.585709  | 3.708290  | -2.251081 |
| C | -0.606098  | 4.825985  | -1.298859 |
| C | 0.902731   | 8.581462  | 0.343870  |
| N | 0.586288   | 7.472008  | -0.546542 |
| C | 1.159255   | 7.633013  | -1.885924 |
| C | 1.214904   | 6.205985  | -2.456628 |
| C | 0.871916   | 5.277372  | -1.255018 |
| C | 1.562594   | 3.941604  | -1.427529 |

|   |           |           |           |
|---|-----------|-----------|-----------|
| C | 2.885049  | 3.584149  | -1.212455 |
| C | 3.317246  | 2.322201  | -1.632380 |
| C | 2.432165  | 1.459776  | -2.275748 |
| C | 1.100062  | 1.822550  | -2.507449 |
| C | 0.654388  | 3.073788  | -2.067658 |
| C | 0.270747  | 8.350272  | 1.708270  |
| C | 0.640490  | 6.992195  | 2.279427  |
| C | -1.062003 | 4.288936  | 0.072670  |
| C | -0.949626 | 5.374390  | 1.133153  |
| C | 2.500999  | 5.636432  | 2.640024  |
| C | 1.395179  | 4.780600  | 2.001959  |
| C | 0.505205  | 5.816204  | 1.297996  |
| C | 1.137148  | 6.201877  | -0.051819 |
| C | -2.456684 | 3.672337  | -0.033681 |
| C | -1.869186 | 3.037665  | -2.390562 |
| N | -3.678023 | -4.307303 | -1.052576 |
| C | -2.422541 | -4.175071 | -0.526811 |
| C | 2.004207  | -2.242752 | -1.384805 |
| N | 0.557777  | -2.255524 | -1.256573 |
| C | -0.199619 | -1.330688 | -0.699243 |
| C | -1.526445 | -1.727650 | -0.572032 |
| C | -1.693215 | -3.074686 | -1.305375 |
| C | -2.637998 | -2.852000 | -2.473532 |
| C | -2.541846 | -2.003135 | -3.566257 |
| C | -3.635661 | -1.901079 | -4.434624 |
| C | -4.805243 | -2.623975 | -4.184275 |
| C | -4.920002 | -3.465618 | -3.073152 |
| C | -3.816263 | -3.566494 | -2.232893 |
| C | 2.643174  | -3.420529 | -0.624732 |
| C | 1.856796  | -4.704485 | -0.929868 |
| C | -1.787453 | -4.884753 | 0.442804  |
| C | -0.297271 | -4.668833 | 0.556771  |
| C | 1.150958  | -6.090808 | -2.634559 |
| C | -0.017648 | -5.952633 | -1.643056 |
| C | 0.313270  | -4.669664 | -0.856135 |
| C | -0.207108 | -3.450743 | -1.638565 |
| C | -2.413096 | -5.944022 | 1.228849  |
| C | -4.400829 | -7.097082 | 1.746049  |
| N | 3.630242  | -2.254913 | 1.409745  |
| C | 5.002806  | -2.488867 | 0.944275  |
| C | 9.349836  | -2.103978 | 1.194086  |
| N | 7.930568  | -2.178373 | 1.516332  |
| C | 7.658204  | -1.982483 | 2.943208  |
| C | 6.191685  | -1.524367 | 2.998491  |
| C | 5.786112  | -1.283099 | 1.514196  |
| C | 4.717452  | -0.214260 | 1.462546  |
| C | 4.818781  | 1.162265  | 1.589997  |
| C | 3.651571  | 1.918855  | 1.743186  |
| C | 2.415380  | 1.280122  | 1.817493  |
| C | 2.310300  | -0.109133 | 1.717481  |
| C | 3.466650  | -0.866509 | 1.493606  |

|   |            |           |           |
|---|------------|-----------|-----------|
| C | 9.559219   | -2.322937 | -0.297551 |
| C | 8.690857   | -1.400372 | -1.134597 |
| C | 4.999326   | -2.479116 | -0.596298 |
| C | 6.418564   | -2.537106 | -1.140570 |
| C | 8.098885   | 0.837564  | -1.351248 |
| C | 6.812065   | -0.004620 | -1.390097 |
| C | 7.219826   | -1.313921 | -0.693991 |
| C | 7.158048   | -1.130119 | 0.832069  |
| C | 4.095722   | -3.597958 | -1.102694 |
| C | 2.627814   | -3.186887 | 0.906116  |
| H | -7.459165  | -1.053624 | 2.675490  |
| H | -0.914149  | 1.520225  | 0.042139  |
| H | -1.380028  | 0.726734  | -1.483079 |
| H | -3.588129  | -2.481442 | 1.200993  |
| H | -4.464119  | -1.957383 | -0.252140 |
| H | -2.121504  | -0.312537 | 3.148143  |
| H | -2.256319  | -0.793909 | 5.596605  |
| H | -4.421034  | -1.393494 | 6.635907  |
| H | -6.505914  | -1.523123 | 5.270771  |
| H | -3.871031  | 1.415720  | -2.294781 |
| H | -6.396218  | 0.933730  | -1.680972 |
| H | -5.170155  | -0.311089 | -1.499228 |
| H | -5.849540  | 4.591027  | -0.837044 |
| H | -6.737220  | 3.216656  | -1.555100 |
| H | -4.981559  | 3.243443  | 0.949694  |
| H | -6.517675  | 2.384220  | 0.700389  |
| H | -3.616912  | 1.535608  | 1.520064  |
| H | -10.512564 | -1.314759 | 1.763735  |
| H | -10.412108 | -1.479456 | -0.025848 |
| H | -10.573067 | 0.144502  | 0.711691  |
| H | 2.003616   | 8.683597  | 0.443820  |
| H | 0.519688   | 9.511658  | -0.099943 |
| H | 2.179820   | 8.055563  | -1.813601 |
| H | 0.545875   | 8.322685  | -2.482638 |
| H | 2.223428   | 5.973238  | -2.818939 |
| H | 0.507950   | 6.047062  | -3.279198 |
| H | 3.576905   | 4.277712  | -0.730092 |
| H | 4.347000   | 2.008072  | -1.464048 |
| H | 2.780381   | 0.490292  | -2.640181 |
| H | 0.580536   | 9.136425  | 2.411404  |
| H | -0.824712  | 8.401968  | 1.618128  |
| H | 0.012643   | 6.778631  | 3.165221  |
| H | -0.345616  | 3.495977  | 0.348729  |
| H | -1.325969  | 5.000534  | 2.098286  |
| H | -1.581349  | 6.233653  | 0.854080  |
| H | 3.430658   | 5.624345  | 2.050237  |
| H | 2.733953   | 5.307921  | 3.663524  |
| H | 1.800605   | 4.033259  | 1.306897  |
| H | 0.812089   | 4.257269  | 2.774785  |
| H | 2.237138   | 6.304283  | 0.083170  |
| H | -2.750022  | 3.315951  | 0.965077  |

|   |           |           |           |
|---|-----------|-----------|-----------|
| H | -3.172376 | 4.454712  | -0.329749 |
| H | -2.558137 | 3.778031  | -2.817285 |
| H | -1.771022 | 2.212137  | -3.104195 |
| H | -4.326221 | -5.013225 | -0.729122 |
| H | 2.256601  | -2.317803 | -2.454753 |
| H | 2.365094  | -1.277489 | -1.003449 |
| H | 0.258305  | -0.408786 | -0.343300 |
| H | -1.633108 | -1.423106 | -3.743969 |
| H | -3.577671 | -1.249591 | -5.306251 |
| H | -5.651429 | -2.529337 | -4.865692 |
| H | -5.836199 | -4.021253 | -2.873879 |
| H | 2.214984  | -5.498538 | -0.245498 |
| H | 0.141308  | -5.473514 | 1.161396  |
| H | -0.086128 | -3.718387 | 1.070294  |
| H | 0.856627  | -5.905686 | -3.675986 |
| H | 1.614914  | -7.086126 | -2.569828 |
| H | -0.988239 | -5.895018 | -2.153420 |
| H | -0.055603 | -6.804926 | -0.950045 |
| H | -0.086529 | -3.607751 | -2.720380 |
| H | -4.334117 | -6.874228 | 2.817968  |
| H | -3.947672 | -8.075671 | 1.547137  |
| H | -5.443221 | -7.081077 | 1.415160  |
| H | 9.754119  | -1.115575 | 1.497730  |
| H | 9.883907  | -2.874050 | 1.769300  |
| H | 8.319525  | -1.194737 | 3.352541  |
| H | 7.851644  | -2.911353 | 3.498375  |
| H | 6.103402  | -0.582328 | 3.552789  |
| H | 5.527660  | -2.261485 | 3.464781  |
| H | 5.797273  | 1.647622  | 1.579782  |
| H | 3.711060  | 3.004254  | 1.825416  |
| H | 1.494595  | 1.842595  | 1.982050  |
| H | 10.614762 | -2.165574 | -0.561354 |
| H | 9.307763  | -3.363077 | -0.554429 |
| H | 8.717529  | -1.725559 | -2.192151 |
| H | 4.573136  | -1.507086 | -0.902319 |
| H | 6.397886  | -2.576973 | -2.240871 |
| H | 6.909982  | -3.462157 | -0.796129 |
| H | 8.292818  | 1.327579  | -2.316676 |
| H | 8.070062  | 1.609447  | -0.567807 |
| H | 6.514744  | -0.216994 | -2.427706 |
| H | 5.976824  | 0.502186  | -0.889076 |
| H | 7.575586  | -0.131692 | 1.091317  |
| H | 4.117069  | -3.633565 | -2.200747 |
| H | 4.477252  | -4.564587 | -0.737872 |
| H | 1.648108  | -2.829358 | 1.229826  |
| H | 2.811839  | -4.153788 | 1.397870  |
| H | -1.215286 | 6.645663  | -1.339545 |
| H | 0.720655  | 0.274047  | -3.580442 |
| H | 6.418206  | -3.706002 | 1.394286  |
| H | 1.023901  | -1.209556 | 2.655127  |
| O | -3.737376 | -6.077741 | 0.987656  |

|   |           |           |           |
|---|-----------|-----------|-----------|
| O | 5.445555  | -3.733053 | 1.439041  |
| O | 9.172803  | -0.060152 | -1.039655 |
| O | 1.054558  | -0.690449 | 1.839878  |
| O | -8.650081 | 0.156418  | -1.064625 |
| O | -4.692911 | 3.254161  | -1.898791 |
| O | -1.491034 | 5.816241  | -1.769934 |
| O | 2.016509  | 6.986108  | 2.663244  |
| O | -8.724308 | -0.781886 | 0.978978  |
| O | 0.224959  | 0.995703  | -3.173329 |
| O | 2.109813  | -5.088918 | -2.276277 |
| O | -1.830740 | -6.649323 | 2.034400  |

Equilibrium geometry of anabsinthin (5)

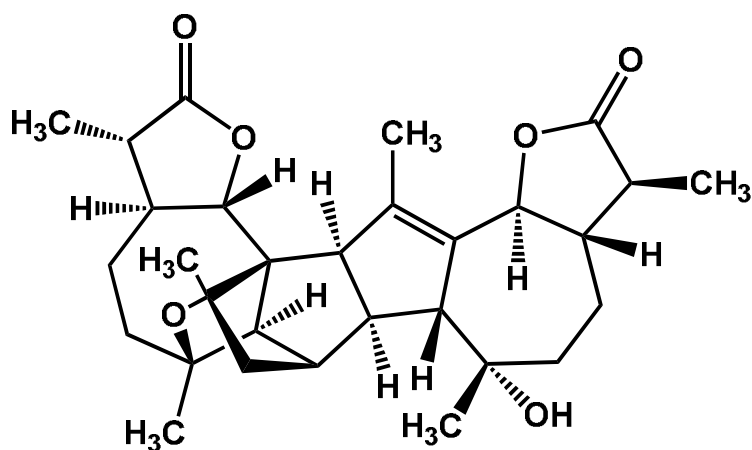

|   |           |           |           |
|---|-----------|-----------|-----------|
| O | -2.352482 | 1.078412  | -2.272179 |
| O | -2.552358 | -1.936139 | 0.706542  |
| O | 2.213547  | 0.406871  | 3.076285  |
| O | 3.089752  | -1.673862 | -1.182207 |
| O | -3.734299 | -3.335790 | 1.966951  |
| O | 4.598536  | -2.247297 | -2.714927 |
| C | -1.648074 | 0.145249  | -0.264228 |
| C | -1.979303 | 1.652662  | -0.054392 |
| C | -0.505952 | 2.110477  | -0.165333 |
| C | -1.182604 | 0.431992  | -1.726658 |
| C | -0.515706 | -0.100270 | 0.765705  |
| C | 0.147845  | 1.285635  | 0.949266  |
| C | -2.822210 | 2.028670  | -1.285452 |
| C | -0.108125 | 1.514567  | -1.533576 |
| C | -2.811690 | -0.846564 | -0.217402 |
| C | 1.677773  | 1.090254  | 0.847225  |
| C | 0.624029  | -1.010605 | 0.404030  |
| C | -4.174455 | -0.318123 | 0.219375  |
| C | -4.335191 | 1.866783  | -1.082082 |
| C | 1.791746  | -0.364376 | 0.420992  |
| C | -0.778154 | -0.685694 | -2.651669 |
| C | -4.875177 | 0.456707  | -0.879750 |



|   |           |           |           |
|---|-----------|-----------|-----------|
| C | 2.466439  | 1.452444  | 2.135438  |
| C | -2.594620 | 3.460431  | -1.767657 |
| C | -4.866435 | -1.608095 | 0.653437  |
| C | 3.101059  | -1.020747 | 0.122730  |
| C | 0.410926  | -2.469978 | 0.167909  |
| C | 3.980913  | 1.599605  | 1.896545  |
| C | -3.706331 | -2.409053 | 1.201824  |
| C | 4.315528  | -0.111264 | 0.049653  |
| C | 4.764631  | 0.386110  | 1.410305  |
| C | 1.987264  | 2.793265  | 2.699573  |
| C | -6.017774 | -1.469936 | 1.630079  |
| C | 5.287001  | -1.000410 | -0.722384 |
| C | 4.342456  | -1.715692 | -1.668055 |
| C | 6.432402  | -0.308584 | -1.434437 |
| H | -2.439307 | 1.913726  | 0.897284  |
| H | -0.336514 | 3.181123  | -0.069967 |
| H | -0.979876 | -0.453956 | 1.688392  |
| H | -0.139643 | 1.704111  | 1.908691  |
| H | 0.892665  | 1.089163  | -1.537009 |
| H | -0.166793 | 2.224289  | -2.355837 |
| H | -2.933946 | -1.308618 | -1.199995 |
| H | 2.078642  | 1.757070  | 0.075167  |
| H | -4.046914 | 0.310573  | 1.107710  |
| H | -4.836896 | 2.303808  | -1.947947 |
| H | -4.607822 | 2.485109  | -0.222645 |
| H | 0.143076  | -1.148641 | -2.300930 |
| H | -1.549496 | -1.449293 | -2.745722 |
| H | -0.593151 | -0.271278 | -3.643652 |
| H | -5.939230 | 0.532040  | -0.647304 |
| H | -4.795365 | -0.111359 | -1.809917 |
| H | -3.123368 | 3.613231  | -2.708404 |
| H | -2.996074 | 4.162303  | -1.034956 |
| H | -1.546213 | 3.694837  | -1.924022 |
| H | -5.197636 | -2.145539 | -0.244232 |
| H | 3.295494  | -1.811151 | 0.856833  |
| H | -0.311880 | -2.639861 | -0.632188 |
| H | 1.333590  | -2.986746 | -0.083482 |
| H | -0.020208 | -2.919397 | 1.064659  |
| H | 4.417919  | 1.927101  | 2.843326  |
| H | 4.126669  | 2.423434  | 1.191964  |
| H | 4.070164  | 0.743222  | -0.592091 |
| H | 4.693524  | -0.427740 | 2.136798  |
| H | 5.817817  | 0.669477  | 1.359789  |
| H | 0.996401  | 2.711707  | 3.137900  |
| H | 1.961862  | 3.552985  | 1.916713  |
| H | 2.669510  | 3.135428  | 3.478949  |
| H | -5.695519 | -0.943348 | 2.528787  |
| H | -6.394708 | -2.448363 | 1.922334  |
| H | -6.834205 | -0.909343 | 1.176777  |
| H | 2.598598  | 0.659290  | 3.922050  |
| H | 5.674336  | -1.769725 | -0.042673 |

|   |          |           |           |
|---|----------|-----------|-----------|
| H | 6.053601 | 0.440444  | -2.130228 |
| H | 7.026837 | -1.027368 | -1.995404 |
| H | 7.083210 | 0.186916  | -0.715295 |

Equilibrium geometry of asperlicin (6)

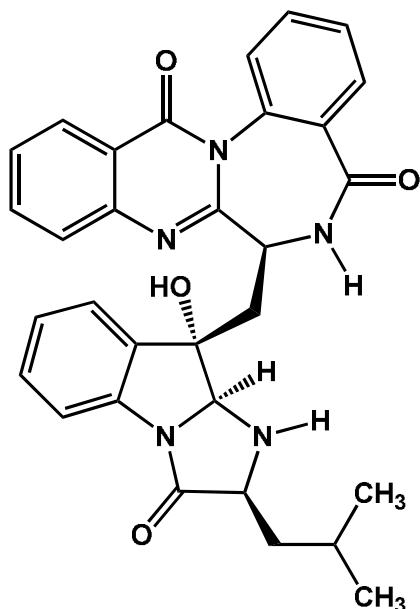

|   |           |           |           |
|---|-----------|-----------|-----------|
| C | 6.394614  | 0.062583  | -1.378436 |
| C | 6.598687  | -0.596205 | -0.159305 |
| C | 5.523966  | -1.107573 | 0.533308  |
| C | 4.235090  | -0.955293 | 0.015636  |
| C | 4.029038  | -0.311228 | -1.203357 |
| C | 5.128361  | 0.200240  | -1.903172 |
| C | 3.079455  | -1.431078 | 0.768222  |
| N | 1.821263  | -1.029988 | 0.236496  |
| C | 1.745759  | -0.580628 | -1.070988 |
| N | 2.768719  | -0.233234 | -1.762529 |
| C | 0.722837  | -1.006347 | 1.166489  |
| C | -0.525470 | -1.548277 | 0.890987  |
| C | -0.896834 | -2.188862 | -0.396305 |
| N | -0.573234 | -1.554431 | -1.555653 |
| C | 0.455555  | -0.575103 | -1.892902 |
| C | 0.971341  | -0.473042 | 2.426775  |
| C | -0.009792 | -0.477592 | 3.398095  |
| C | -1.259612 | -1.016716 | 3.128777  |
| C | -1.507108 | -1.554635 | 1.882375  |
| O | -1.561352 | -3.210482 | -0.416592 |
| O | 3.148547  | -2.073908 | 1.790402  |
| C | -0.002458 | 0.822222  | -2.357610 |
| C | -0.515169 | 1.966764  | -1.466429 |
| C | 0.071664  | 2.115553  | -0.071733 |
| C | -0.938178 | 2.151125  | 0.892219  |
| N | -2.168014 | 1.913104  | 0.275541  |
| C | -2.038523 | 1.986183  | -1.186114 |

|   |           |           |           |
|---|-----------|-----------|-----------|
| C | 1.381961  | 2.364330  | 0.291904  |
| C | 1.662641  | 2.679155  | 1.619608  |
| C | 0.640963  | 2.735403  | 2.560449  |
| C | -0.678388 | 2.465352  | 2.213993  |
| N | -2.929464 | 0.966974  | -1.697110 |
| C | -4.040416 | 1.035443  | -0.721950 |
| C | -3.331560 | 1.303863  | 0.627415  |
| O | -3.724939 | 1.041871  | 1.743504  |
| C | -4.987319 | -0.147512 | -0.687063 |
| C | -4.285230 | -1.509770 | -0.678291 |
| C | -5.032641 | -2.517681 | 0.186252  |
| C | -4.104768 | -2.058144 | -2.092684 |
| O | -0.303328 | 3.170156  | -2.211288 |
| H | 7.243365  | 0.459785  | -1.918573 |
| H | 7.599165  | -0.702300 | 0.235398  |
| H | 5.649098  | -1.617036 | 1.478512  |
| H | 4.958607  | 0.686308  | -2.853841 |
| H | -0.886500 | -2.090232 | -2.354760 |
| H | 0.852753  | -0.967941 | -2.827571 |
| H | 1.943238  | -0.059651 | 2.646501  |
| H | 0.201850  | -0.045410 | 4.366572  |
| H | -2.034322 | -1.016818 | 3.881937  |
| H | -2.463772 | -2.004161 | 1.656194  |
| H | 0.881380  | 1.217673  | -2.860054 |
| H | -0.746366 | 0.670642  | -3.142602 |
| H | -2.405759 | 2.958055  | -1.522739 |
| H | 2.178738  | 2.342858  | -0.443676 |
| H | 2.680027  | 2.892899  | 1.916804  |
| H | 0.875006  | 2.989387  | 3.585713  |
| H | -1.477581 | 2.505329  | 2.939817  |
| H | -2.474841 | 0.060786  | -1.594473 |
| H | -4.606609 | 1.946652  | -0.945491 |
| H | -5.584477 | -0.027375 | 0.219113  |
| H | -5.673604 | -0.089416 | -1.534085 |
| H | -3.297694 | -1.373770 | -0.230189 |
| H | -4.513751 | -3.477077 | 0.192020  |
| H | -5.118999 | -2.163193 | 1.214564  |
| H | -6.041509 | -2.676942 | -0.201968 |
| H | -3.508239 | -2.969756 | -2.075809 |
| H | -5.082230 | -2.293270 | -2.520977 |
| H | -3.627189 | -1.337682 | -2.758756 |
| H | 0.643109  | 3.328399  | -2.289995 |

Equilibrium geometry of chetomin (7)

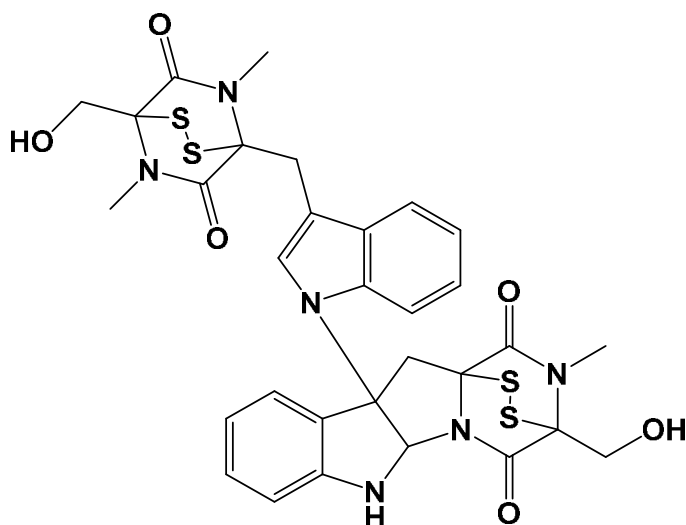

|   |           |           |           |
|---|-----------|-----------|-----------|
| S | 5.174918  | 0.690405  | -0.420283 |
| S | 6.000094  | -1.038296 | 0.412444  |
| S | -2.867353 | -1.100449 | 0.232448  |
| S | -4.285768 | -2.621712 | 0.069442  |
| O | 3.026147  | -2.813002 | 1.244671  |
| O | 3.729484  | -0.555354 | -3.267270 |
| O | 5.839832  | -3.675966 | 1.262674  |
| O | -4.399662 | 1.487021  | -1.535818 |
| O | -6.915653 | -1.314590 | 1.854258  |
| O | -7.082400 | -3.503944 | 0.205577  |
| N | 2.945435  | -0.860616 | 0.098320  |
| N | 0.287532  | 1.513081  | -0.161448 |
| N | 1.902710  | -0.065754 | 2.147177  |
| N | 4.570871  | -2.055087 | -1.755640 |
| N | -5.085481 | 0.002519  | 1.506467  |
| N | -5.518517 | -0.468029 | -1.199920 |
| C | 1.672586  | 1.123773  | 0.082144  |
| C | 1.753873  | -0.296626 | 0.730669  |
| C | 3.530358  | -0.058705 | -0.926578 |
| C | 2.499756  | 1.020994  | -1.211925 |
| C | 2.317521  | 1.968256  | 1.164242  |
| C | 4.798247  | -2.285489 | -0.349190 |
| C | 3.497472  | -2.049311 | 0.429321  |
| C | 3.928837  | -0.904857 | -2.123644 |
| C | 2.454323  | 1.209151  | 2.322631  |
| C | -0.182674 | 2.496582  | -1.015852 |
| C | -0.752783 | 1.131153  | 0.657022  |
| C | 2.726074  | 3.285855  | 1.122116  |
| C | 5.371531  | -3.667546 | -0.064694 |
| C | -1.909107 | 1.758929  | 0.302623  |
| C | -1.565094 | 2.655770  | -0.764482 |
| C | 3.032396  | 1.749265  | 3.460801  |
| C | 5.278728  | -2.816355 | -2.780554 |
| C | -3.226783 | 1.559702  | 0.989183  |

|   |           |           |           |
|---|-----------|-----------|-----------|
| C | 3.301342  | 3.842519  | 2.260572  |
| C | 0.473839  | 3.280177  | -1.969578 |
| C | -4.057031 | 0.342819  | 0.551155  |
| C | 3.455410  | 3.073053  | 3.408877  |
| C | -2.293384 | 3.606953  | -1.487543 |
| C | -5.775030 | -1.504390 | -0.248998 |
| C | -0.270457 | 4.212090  | -2.663526 |
| C | -4.677011 | 0.541585  | -0.831617 |
| C | -1.643112 | 4.377317  | -2.426463 |
| C | -6.007679 | -0.921784 | 1.138621  |
| C | -4.987329 | 0.371509  | 2.916107  |
| C | -6.940564 | -2.408942 | -0.657226 |
| C | -5.865124 | -0.632364 | -2.607549 |
| H | 0.899393  | -0.935056 | 0.513369  |
| H | 1.876367  | 0.701563  | -2.046939 |
| H | 2.980233  | 1.957937  | -1.478002 |
| H | 2.278513  | -0.838448 | 2.678979  |
| H | -0.584291 | 0.430292  | 1.459328  |
| H | 2.609503  | 3.873313  | 0.218982  |
| H | 6.187414  | -3.868007 | -0.758361 |
| H | 4.573531  | -4.399251 | -0.219819 |
| H | 3.152169  | 1.159909  | 4.359532  |
| H | 6.355863  | -2.671782 | -2.689200 |
| H | 4.948239  | -2.440206 | -3.742132 |
| H | 5.038618  | -3.874297 | -2.709472 |
| H | -3.859859 | 2.438905  | 0.855902  |
| H | -3.029147 | 1.453833  | 2.052184  |
| H | 3.635509  | 4.870093  | 2.250513  |
| H | 1.528383  | 3.186976  | -2.171375 |
| H | 3.913645  | 3.512058  | 4.284934  |
| H | -3.352557 | 3.722988  | -1.310198 |
| H | 6.162312  | -4.555955 | 1.473752  |
| H | 0.220720  | 4.829118  | -3.403496 |
| H | -2.193216 | 5.119015  | -2.989116 |
| H | -4.060002 | -0.013769 | 3.340632  |
| H | -5.829270 | -0.082396 | 3.425736  |
| H | -5.030758 | 1.450239  | 3.039187  |
| H | -6.758015 | -2.809079 | -1.651344 |
| H | -7.842977 | -1.789753 | -0.684654 |
| H | -5.383988 | -1.524846 | -3.009631 |
| H | -5.499357 | 0.241703  | -3.134299 |
| H | -6.942406 | -0.704240 | -2.737800 |
| H | -7.279464 | -3.142613 | 1.080596  |

Equilibrium geometry of diosgenin-3-O- $\beta$ -D-glucopyranoside (8)

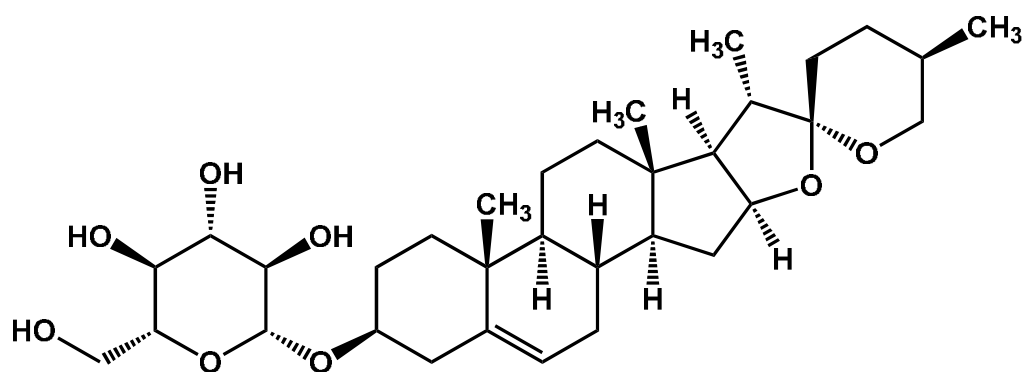

|   |           |           |           |
|---|-----------|-----------|-----------|
| O | 5.946016  | 0.808737  | -0.381183 |
| O | 7.256757  | 0.555770  | 1.515506  |
| O | -5.295839 | -0.659263 | -1.530560 |
| O | -6.236308 | 1.100233  | -0.445365 |
| O | -6.732577 | -2.460162 | 0.224094  |
| O | -7.843321 | -1.211757 | 2.529288  |
| O | -8.805617 | 1.386401  | 2.146078  |
| O | -7.156870 | 3.746367  | -0.943125 |
| C | 3.247813  | -1.014505 | 0.118926  |
| C | 2.463994  | 0.297676  | -0.062407 |
| C | 4.462695  | -0.494106 | 0.921765  |
| C | 1.165204  | 0.162128  | -0.842041 |
| C | 4.723215  | 0.924008  | 0.346538  |
| C | 0.275671  | -0.905893 | -0.178579 |
| C | 3.527266  | 1.289491  | -0.539288 |
| C | 2.348248  | -1.993123 | 0.867537  |
| C | 5.819276  | -1.206547 | 0.799226  |
| C | 1.036112  | -2.210962 | 0.108188  |
| C | -1.042782 | -1.140530 | -0.963708 |
| C | 6.768540  | -0.081140 | 0.348043  |
| C | 3.680431  | -1.608008 | -1.228768 |
| C | 0.424849  | 1.494986  | -0.889858 |
| C | -1.654182 | 0.188445  | -1.390078 |
| C | -2.052287 | -1.850008 | -0.031844 |
| C | 6.259522  | -1.947343 | 2.051765  |
| C | 7.913249  | -0.527269 | -0.544763 |
| C | -0.999402 | 1.344750  | -1.324031 |
| C | -0.804145 | -2.009484 | -2.212020 |
| C | -3.077436 | 0.146533  | -1.890883 |
| C | -3.463184 | -1.953829 | -0.602306 |
| C | -4.002245 | -0.571407 | -0.918963 |
| C | 8.865979  | 0.623522  | -0.846948 |
| C | 9.324959  | 1.290032  | 0.446241  |
| C | 8.097722  | 1.674039  | 1.257166  |
| C | 10.195622 | 2.509791  | 0.184396  |
| C | -6.379163 | -0.269340 | -0.767152 |
| C | -6.572470 | -1.089661 | 0.515231  |
| C | -7.749492 | -0.531589 | 1.297482  |

|   |           |           |           |
|---|-----------|-----------|-----------|
| C | -7.378516 | 1.663443  | 0.175761  |
| C | -7.606387 | 0.966050  | 1.516224  |
| C | -7.134003 | 3.143094  | 0.337591  |
| H | 2.175613  | 0.610191  | 0.952223  |
| H | 4.172629  | -0.420216 | 1.972264  |
| H | 1.384149  | -0.137099 | -1.871966 |
| H | 4.859028  | 1.654775  | 1.146428  |
| H | -0.015763 | -0.482100 | 0.792975  |
| H | 3.774040  | 1.122240  | -1.589341 |
| H | 3.226575  | 2.329511  | -0.425076 |
| H | 2.132828  | -1.585033 | 1.860365  |
| H | 2.854332  | -2.950994 | 1.016098  |
| H | 5.791414  | -1.914987 | -0.028203 |
| H | 1.255825  | -2.721284 | -0.830131 |
| H | 0.400592  | -2.885894 | 0.682697  |
| H | 2.850859  | -1.664740 | -1.930889 |
| H | 4.470790  | -1.019374 | -1.695446 |
| H | 4.058320  | -2.622710 | -1.093266 |
| H | 0.940020  | 2.185493  | -1.562383 |
| H | 0.459236  | 1.966158  | 0.100826  |
| H | -2.096679 | -1.295553 | 0.911261  |
| H | -1.686231 | -2.849282 | 0.204932  |
| H | 5.572487  | -2.768453 | 2.259593  |
| H | 7.259871  | -2.366829 | 1.934528  |
| H | 6.269155  | -1.281243 | 2.912638  |
| H | 7.494318  | -0.948141 | -1.459265 |
| H | 8.445380  | -1.326275 | -0.022028 |
| H | -1.521252 | 2.251704  | -1.614645 |
| H | -1.671884 | -2.013410 | -2.869129 |
| H | 0.042073  | -1.637714 | -2.791441 |
| H | -0.601193 | -3.044141 | -1.934053 |
| H | -3.444047 | 1.158091  | -2.065801 |
| H | -3.134284 | -0.388244 | -2.844276 |
| H | -3.471766 | -2.546811 | -1.520573 |
| H | -4.120704 | -2.459800 | 0.105252  |
| H | -4.071808 | 0.020398  | -0.001600 |
| H | 9.726245  | 0.266157  | -1.415546 |
| H | 8.355243  | 1.367524  | -1.465381 |
| H | 9.892739  | 0.558540  | 1.030655  |
| H | 8.379681  | 2.067641  | 2.233548  |
| H | 7.532414  | 2.447168  | 0.723882  |
| H | 10.534662 | 2.965242  | 1.115782  |
| H | 11.075137 | 2.239396  | -0.400462 |
| H | 9.638447  | 3.262941  | -0.377144 |
| H | -7.258530 | -0.403366 | -1.411617 |
| H | -5.676324 | -1.012031 | 1.134779  |
| H | -8.666954 | -0.690346 | 0.709679  |
| H | -8.262917 | 1.514390  | -0.459003 |
| H | -6.743037 | 1.146432  | 2.166036  |
| H | -7.556367 | -2.589648 | -0.258041 |
| H | -6.163900 | 3.284953  | 0.823788  |

|   |           |           |           |
|---|-----------|-----------|-----------|
| H | -7.914578 | 3.564456  | 0.976596  |
| H | -8.542469 | -0.784040 | 3.036776  |
| H | -8.632618 | 2.139426  | 2.716489  |
| H | -6.936762 | 4.676866  | -0.851899 |

Equilibrium geometry of itoaic acid (9)

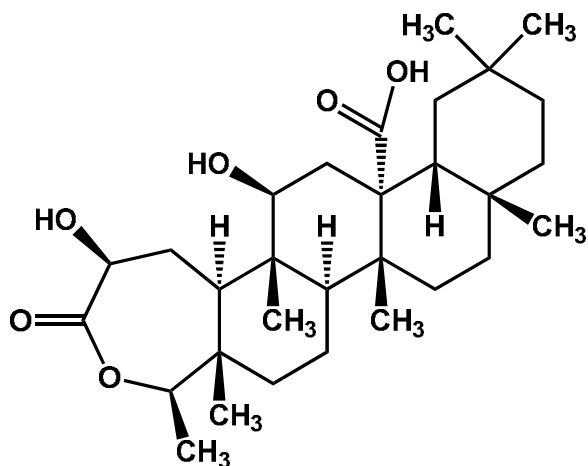

|   |           |           |           |
|---|-----------|-----------|-----------|
| C | -3.407752 | -1.105963 | -0.224295 |
| C | -2.544170 | 0.167520  | 0.056563  |
| C | -1.247516 | -0.085103 | 0.920009  |
| C | -0.415959 | -1.139573 | 0.107067  |
| C | -1.215906 | -2.431605 | -0.035039 |
| C | -2.496011 | -2.189054 | -0.820115 |
| C | -0.412654 | 1.219180  | 0.992315  |
| C | 1.070128  | 1.018467  | 1.320820  |
| C | 1.790694  | 0.039619  | 0.381811  |
| C | 1.068151  | -1.346848 | 0.526498  |
| C | 3.308724  | -0.090404 | 0.776018  |
| C | 4.079641  | -1.253570 | 0.100199  |
| C | 3.253460  | -2.552442 | 0.008172  |
| C | 1.775316  | -2.403157 | -0.349397 |
| C | 4.141068  | 1.221370  | 0.745008  |
| C | 5.043947  | 1.527703  | -0.490426 |
| C | 4.710036  | 0.606339  | -1.666235 |
| C | 4.586138  | -0.884832 | -1.322712 |
| C | -3.355835 | 1.372962  | 0.546364  |
| C | -4.424609 | 1.915123  | -0.411072 |
| C | -5.691312 | 1.088779  | -0.336505 |
| O | -5.654647 | -0.170741 | -0.737374 |
| C | -4.468828 | -0.775162 | -1.311549 |
| O | -4.738790 | 3.243107  | -0.071383 |
| O | -6.713564 | 1.548853  | 0.112807  |
| C | -5.027426 | -1.962191 | -2.078442 |
| C | -4.138870 | -1.665394 | 1.002964  |
| C | -1.598193 | -0.504716 | 2.363444  |
| O | -0.953806 | 2.080853  | 1.993650  |
| C | 1.144997  | -1.888592 | 1.968674  |



|   |           |           |           |
|---|-----------|-----------|-----------|
| C | 5.270194  | -1.590115 | 1.014943  |
| C | 6.540230  | 1.398939  | -0.163919 |
| C | 4.809209  | 2.980089  | -0.917325 |
| C | 1.684920  | 0.694441  | -1.000523 |
| O | 1.604066  | -0.116492 | -2.066306 |
| O | 1.698316  | 1.891270  | -1.156459 |
| H | -2.156206 | 0.458722  | -0.929439 |
| H | -0.363960 | -0.733074 | -0.908088 |
| H | -1.440404 | -2.872288 | 0.937271  |
| H | -0.637734 | -3.174967 | -0.579709 |
| H | -3.052516 | -3.123265 | -0.905301 |
| H | -2.214356 | -1.892963 | -1.836697 |
| H | -0.489835 | 1.713159  | 0.017064  |
| H | 1.165794  | 0.678110  | 2.350465  |
| H | 1.533266  | 2.002142  | 1.269542  |
| H | 3.238834  | -0.349722 | 1.834415  |
| H | 3.329935  | -3.084212 | 0.956763  |
| H | 3.736070  | -3.204046 | -0.725326 |
| H | 1.311308  | -3.374290 | -0.177271 |
| H | 1.649343  | -2.178684 | -1.404743 |
| H | 4.778075  | 1.215047  | 1.630737  |
| H | 3.465238  | 2.063074  | 0.884403  |
| H | 5.479096  | 0.732946  | -2.432963 |
| H | 3.789477  | 0.960975  | -2.123991 |
| H | 5.554404  | -1.373485 | -1.455440 |
| H | 3.921380  | -1.338230 | -2.059528 |
| H | -2.683929 | 2.211417  | 0.690391  |
| H | -3.820199 | 1.194846  | 1.518816  |
| H | -4.043736 | 1.901003  | -1.436526 |
| H | -4.038077 | -0.077442 | -2.032945 |
| H | -5.656829 | 3.244668  | 0.233913  |
| H | -4.271383 | -2.412970 | -2.714939 |
| H | -5.421165 | -2.721526 | -1.404028 |
| H | -5.842314 | -1.613677 | -2.709830 |
| H | -4.628190 | -0.888257 | 1.588297  |
| H | -4.912550 | -2.364729 | 0.685129  |
| H | -3.463439 | -2.205921 | 1.659546  |
| H | -1.618708 | -1.582171 | 2.497834  |
| H | -0.885497 | -0.095153 | 3.074380  |
| H | -2.570270 | -0.114967 | 2.655916  |
| H | -0.462042 | 2.907075  | 1.975306  |
| H | 0.726523  | -1.228307 | 2.715621  |
| H | 0.588453  | -2.826256 | 2.013667  |
| H | 2.163479  | -2.112009 | 2.271408  |
| H | 4.909357  | -1.917323 | 1.992235  |
| H | 5.853958  | -2.405490 | 0.583177  |
| H | 5.934760  | -0.747384 | 1.177320  |
| H | 6.872282  | 0.365275  | -0.091004 |
| H | 7.124870  | 1.865949  | -0.958980 |
| H | 6.784684  | 1.905415  | 0.771787  |
| H | 5.099643  | 3.664549  | -0.116639 |

|   |          |          |           |
|---|----------|----------|-----------|
| H | 5.406266 | 3.222574 | -1.799275 |
| H | 3.758771 | 3.149750 | -1.150500 |
| H | 1.574625 | 0.450444 | -2.851617 |

Equilibrium geometry of jaspamide Q (10)

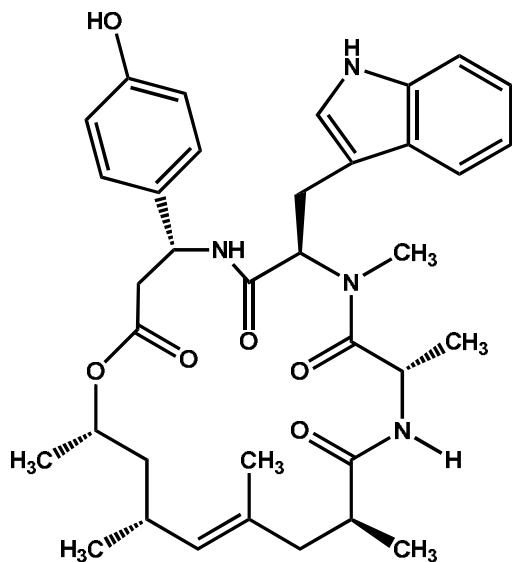

|   |           |           |           |
|---|-----------|-----------|-----------|
| H | -4.571376 | -0.713897 | -3.879176 |
| O | 4.185064  | 0.291683  | -0.973848 |
| O | -0.794533 | 2.543485  | -2.418770 |
| O | -1.441747 | 0.026352  | 1.386564  |
| O | 0.313452  | -4.377678 | 1.196744  |
| O | 2.610094  | 0.921698  | -2.439061 |
| O | 0.521335  | 7.050226  | 2.860218  |
| N | -1.747424 | -0.403372 | -0.809692 |
| N | 0.176665  | 1.704484  | -0.545181 |
| N | -0.601063 | -2.436721 | 1.893837  |
| N | -5.772499 | -1.471786 | -2.290232 |
| C | -2.075158 | 0.998500  | -1.069889 |
| C | -3.208307 | 1.172693  | -2.084825 |
| C | 4.759529  | -2.729754 | -0.711548 |
| C | 5.626454  | -1.598678 | -1.283090 |
| C | 1.327802  | 2.598285  | -0.552786 |
| C | -4.314520 | 0.186316  | -1.880361 |
| C | -0.833398 | 1.826508  | -1.434684 |
| C | 4.868866  | -0.486036 | -1.983095 |
| C | 1.543619  | -3.066011 | 2.810062  |
| C | 2.329087  | -1.859045 | 2.224934  |
| C | -1.513732 | -2.273825 | 0.782353  |
| C | -1.551091 | -0.782849 | 0.463916  |
| C | 2.828340  | -2.052178 | 0.812643  |
| C | 4.099719  | -2.379987 | 0.595013  |
| C | 2.600890  | 1.833468  | -0.207389 |
| C | -4.986777 | -0.152274 | -0.653538 |
| C | 0.363690  | -3.384582 | 1.907286  |

|   |           |           |           |
|---|-----------|-----------|-----------|
| C | 5.619115  | -3.979279 | -0.501239 |
| C | -1.591652 | -1.321600 | -1.935101 |
| C | 1.111662  | 3.776110  | 0.375300  |
| C | -4.826398 | -0.641991 | -2.835326 |
| C | -5.886644 | -1.201180 | -0.952553 |
| C | 5.781762  | 0.437976  | -2.766224 |
| C | 2.430685  | -4.280783 | 3.017093  |
| C | 3.100938  | 0.970766  | -1.339789 |
| C | -2.937403 | -2.737495 | 1.094708  |
| C | 1.831778  | -1.843130 | -0.299336 |
| C | -4.912191 | 0.311815  | 0.667639  |
| C | -6.688627 | -1.797997 | 0.019262  |
| C | 1.110144  | 5.074919  | -0.119273 |
| C | 0.907384  | 3.587053  | 1.739297  |
| C | -5.703898 | -0.276633 | 1.632129  |
| C | -6.581557 | -1.326028 | 1.311470  |
| C | 0.913721  | 6.162412  | 0.717949  |
| C | 0.707518  | 4.662573  | 2.588580  |
| C | 0.711715  | 5.955707  | 2.075550  |
| H | -2.402645 | 1.393593  | -0.110690 |
| H | -2.825352 | 1.093351  | -3.100785 |
| H | -3.563387 | 2.198571  | -1.978776 |
| H | 3.995928  | -2.971707 | -1.452358 |
| H | 6.254633  | -1.169057 | -0.498095 |
| H | 6.301712  | -2.027146 | -2.026333 |
| H | 1.414257  | 2.967734  | -1.571116 |
| H | 4.112332  | -0.909431 | -2.643833 |
| H | 1.143401  | -2.739625 | 3.772145  |
| H | 3.175574  | -1.681508 | 2.887855  |
| H | 1.694090  | -0.970368 | 2.269985  |
| H | -1.119746 | -2.853972 | -0.047294 |
| H | 4.755508  | -2.456082 | 1.460402  |
| H | -0.048056 | 1.228985  | 0.321412  |
| H | 2.474190  | 1.208205  | 0.679325  |
| H | 3.400058  | 2.535617  | 0.031401  |
| H | 5.027777  | -4.794081 | -0.085812 |
| H | 6.055742  | -4.313720 | -1.441132 |
| H | 6.432848  | -3.766364 | 0.193815  |
| H | -0.483946 | -1.614463 | 2.467586  |
| H | -1.683035 | -0.756359 | -2.855995 |
| H | -2.361047 | -2.091362 | -1.933470 |
| H | -0.605725 | -1.781623 | -1.921499 |
| H | 6.271320  | -0.113520 | -3.566191 |
| H | 5.214882  | 1.254523  | -3.207830 |
| H | 6.546993  | 0.852001  | -2.110628 |
| H | 1.865641  | -5.108749 | 3.439897  |
| H | 2.859579  | -4.609944 | 2.073139  |
| H | 3.244882  | -4.034193 | 3.696730  |
| H | -6.290943 | -2.170350 | -2.792276 |
| H | -2.926294 | -3.798583 | 1.332098  |
| H | -3.331660 | -2.183501 | 1.944864  |

|   |           |           |           |
|---|-----------|-----------|-----------|
| H | -3.597843 | -2.567223 | 0.243446  |
| H | 1.147527  | -2.687277 | -0.392485 |
| H | 2.312939  | -1.705018 | -1.263812 |
| H | 1.226710  | -0.951968 | -0.103700 |
| H | -4.248545 | 1.121067  | 0.937885  |
| H | -7.365772 | -2.601802 | -0.232714 |
| H | 1.263093  | 5.242119  | -1.177296 |
| H | 0.900131  | 2.587468  | 2.157312  |
| H | -5.649650 | 0.072378  | 2.653444  |
| H | -7.186321 | -1.768142 | 2.090263  |
| H | 0.911538  | 7.171256  | 0.331364  |
| H | 0.549130  | 4.502916  | 3.646984  |
| H | 0.391465  | 6.784271  | 3.775197  |

Equilibrium geometry of korundamine A (11)

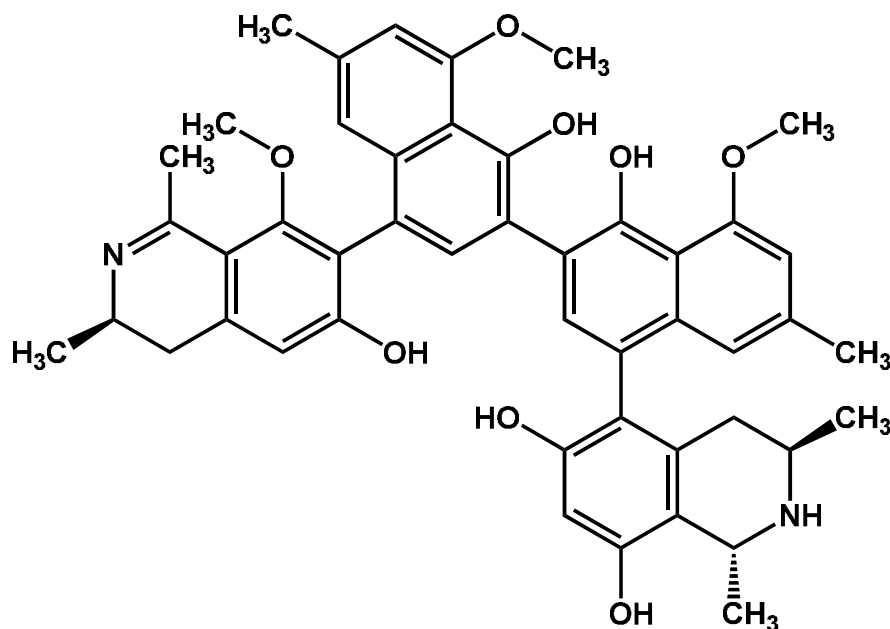

|   |          |           |           |
|---|----------|-----------|-----------|
| C | 6.711090 | -4.269977 | 0.873019  |
| N | 6.633041 | -3.452999 | 2.088490  |
| C | 5.760378 | -2.523900 | 2.143585  |
| C | 4.792621 | -2.271343 | 1.040323  |
| C | 4.539675 | -3.326252 | 0.154453  |
| C | 5.316183 | -4.594082 | 0.351886  |
| C | 4.108574 | -1.064660 | 0.849438  |
| C | 3.165399 | -0.904542 | -0.171863 |
| C | 2.909083 | -1.997378 | -1.002254 |
| C | 3.599510 | -3.194553 | -0.847899 |
| C | 2.475162 | 0.390649  | -0.405946 |
| C | 1.129265 | 0.485923  | -0.188584 |
| C | 0.405822 | 1.687910  | -0.341801 |
| C | 1.100600 | 2.812302  | -0.738171 |
| C | 2.501148 | 2.769030  | -0.999640 |
| C | 3.194552 | 1.539323  | -0.840774 |

|   |           |           |           |
|---|-----------|-----------|-----------|
| C | 4.582982  | 1.478198  | -1.122961 |
| C | 5.277162  | 2.575556  | -1.541992 |
| C | 4.597096  | 3.807744  | -1.694996 |
| C | 3.259824  | 3.903603  | -1.435986 |
| C | -1.062880 | 1.651659  | -0.117753 |
| C | -1.778632 | 0.593888  | -0.719178 |
| C | -3.111991 | 0.390380  | -0.513255 |
| C | -3.821618 | 1.273923  | 0.349017  |
| C | -3.135622 | 2.351208  | 0.978657  |
| C | -1.742435 | 2.531836  | 0.709537  |
| C | -3.905060 | 3.196033  | 1.855709  |
| C | -5.245933 | 2.970382  | 2.042589  |
| C | -5.916861 | 1.909173  | 1.395561  |
| C | -5.209717 | 1.083893  | 0.572093  |
| C | -3.801675 | -0.748174 | -1.182154 |
| C | -4.213340 | -0.622164 | -2.507143 |
| C | -4.876970 | -1.655160 | -3.150708 |
| C | -5.129047 | -2.830302 | -2.464179 |
| C | -4.725315 | -3.003177 | -1.137478 |
| C | -4.064641 | -1.946532 | -0.506167 |
| C | -3.661408 | -2.070782 | 0.944175  |
| C | -3.682007 | -3.504677 | 1.461525  |
| N | -4.888758 | -4.216925 | 1.037663  |
| C | -5.012322 | -4.312360 | -0.416343 |
| C | 7.589629  | -3.578588 | -0.166740 |
| C | 5.692459  | -1.715780 | 3.412337  |
| O | 1.993833  | -1.833058 | -1.990862 |
| O | 4.447955  | -0.004663 | 1.634894  |
| C | 3.426986  | 0.619655  | 2.412605  |
| C | 6.745343  | 2.516623  | -1.849156 |
| O | 2.567078  | 5.072040  | -1.575165 |
| C | 3.260038  | 6.232535  | -2.014932 |
| O | 0.383201  | 3.962364  | -0.881537 |
| O | -1.086960 | 3.553393  | 1.313093  |
| O | -3.255813 | 4.201537  | 2.483664  |
| C | -3.996177 | 5.035259  | 3.354421  |
| C | -7.386491 | 1.721723  | 1.639675  |
| O | -3.957720 | 0.556248  | -3.142922 |
| O | -5.801364 | -3.793780 | -3.159834 |
| C | -4.126811 | -5.448305 | -0.939428 |
| C | -3.573738 | -3.543262 | 2.975415  |
| H | -5.695197 | -3.720694 | 1.405815  |
| H | 7.197548  | -5.202599 | 1.158268  |
| H | 5.370612  | -5.160184 | -0.578019 |
| H | 4.800806  | -5.220364 | 1.086730  |
| H | 3.406733  | -4.018315 | -1.524887 |
| H | 0.590134  | -0.392882 | 0.143237  |
| H | 5.095308  | 0.533309  | -1.005766 |
| H | 5.156518  | 4.670960  | -2.023633 |
| H | -1.240170 | -0.079880 | -1.375338 |
| H | -5.706873 | 0.263726  | 0.071176  |

|   |           |           |           |
|---|-----------|-----------|-----------|
| H | -5.818139 | 3.609256  | 2.697994  |
| H | -5.210240 | -1.554846 | -4.175681 |
| H | -4.348122 | -1.465716 | 1.548982  |
| H | -2.671016 | -1.635434 | 1.088414  |
| H | -2.829462 | -4.039065 | 1.036985  |
| H | -6.056329 | -4.586655 | -0.600398 |
| H | 7.722500  | -4.221179 | -1.037129 |
| H | 7.140734  | -2.639565 | -0.492963 |
| H | 8.569491  | -3.360644 | 0.255936  |
| H | 6.111886  | -0.722277 | 3.264899  |
| H | 4.659908  | -1.584068 | 3.736105  |
| H | 6.255489  | -2.234445 | 4.183652  |
| H | 1.927787  | -2.640160 | -2.512352 |
| H | 2.577828  | -0.050828 | 2.545168  |
| H | 3.866006  | 0.845831  | 3.382788  |
| H | 3.090594  | 1.540638  | 1.937779  |
| H | 7.142124  | 1.517647  | -1.682421 |
| H | 6.932780  | 2.795497  | -2.886992 |
| H | 7.297752  | 3.218090  | -1.222547 |
| H | 4.048100  | 6.495152  | -1.309714 |
| H | 3.684776  | 6.069386  | -3.005083 |
| H | 2.520480  | 7.024756  | -2.055261 |
| H | 0.980800  | 4.676697  | -1.168726 |
| H | -0.411419 | 3.884032  | 0.698817  |
| H | -3.289009 | 5.759563  | 3.746207  |
| H | -4.793255 | 5.555317  | 2.820078  |
| H | -4.426357 | 4.462328  | 4.177933  |
| H | -7.942908 | 2.611997  | 1.343003  |
| H | -7.773085 | 0.871269  | 1.082149  |
| H | -7.583260 | 1.558840  | 2.700328  |
| H | -4.300541 | 0.522119  | -4.041800 |
| H | -5.987980 | -4.554245 | -2.602069 |
| H | -4.417383 | -6.389172 | -0.474745 |
| H | -4.202055 | -5.553764 | -2.021951 |
| H | -3.079855 | -5.253348 | -0.711099 |
| H | -4.450104 | -3.071609 | 3.425863  |
| H | -3.514935 | -4.570326 | 3.332224  |
| H | -2.689998 | -3.002076 | 3.313097  |

Equilibrium geometry of limonin (12)

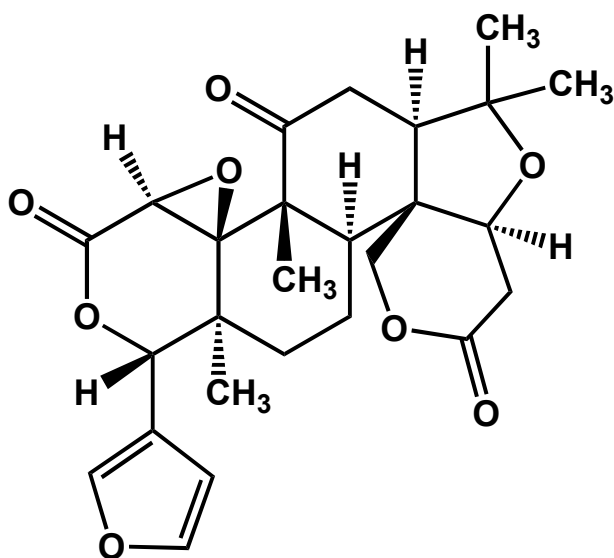

|   |           |           |           |
|---|-----------|-----------|-----------|
| O | -1.973063 | -1.231342 | -2.049429 |
| O | 3.984992  | 0.948083  | 1.322761  |
| O | -4.222653 | -1.048697 | -0.223655 |
| O | 4.263902  | 0.724640  | -1.564344 |
| O | -0.183371 | -2.898039 | 0.951474  |
| O | -4.177136 | -3.249158 | -0.210668 |
| O | 5.451520  | 2.567432  | -1.443803 |
| O | -5.469064 | 3.156413  | 0.535721  |
| C | -1.402377 | -0.998736 | -0.762088 |
| C | 0.132844  | -1.141237 | -0.676736 |
| C | 0.716731  | 0.255105  | -0.261419 |
| C | 2.248909  | 0.244229  | -0.098157 |
| C | -2.070106 | 0.167015  | -0.040273 |
| C | -2.234736 | -2.178448 | -1.028657 |
| C | 2.504290  | -0.797926 | 1.008195  |
| C | 0.009782  | 1.333037  | -1.075309 |
| C | -1.410783 | 1.498350  | -0.504793 |
| C | 2.842733  | 1.458464  | 0.628551  |
| C | 0.586405  | -2.180329 | 0.364317  |
| C | 2.087891  | -2.215236 | 0.645541  |
| C | 3.895914  | -0.479673 | 1.552966  |
| C | -3.552696 | 0.204521  | -0.487327 |
| C | 0.621612  | -1.669696 | -2.040234 |
| C | 2.990278  | 0.075447  | -1.441527 |
| C | -2.006504 | -0.061760 | 1.477181  |
| C | -3.622156 | -2.216719 | -0.470294 |
| C | 3.342874  | 2.550916  | -0.296204 |
| C | 5.036511  | -1.191513 | 0.841726  |
| C | 3.984806  | -0.723662 | 3.051243  |
| C | -4.368789 | 1.254770  | 0.189295  |
| C | 4.443053  | 1.987321  | -1.149839 |
| C | -4.927226 | 1.234153  | 1.513010  |
| C | -4.742048 | 2.439083  | -0.348457 |

|   |           |           |           |
|---|-----------|-----------|-----------|
| C | -5.577718 | 2.407187  | 1.660751  |
| H | 0.380851  | 0.431749  | 0.759863  |
| H | -1.790160 | -3.156098 | -1.157602 |
| H | 1.830807  | -0.493153 | 1.818247  |
| H | -0.030035 | 1.072647  | -2.134503 |
| H | 0.523837  | 2.290134  | -1.004394 |
| H | -1.377269 | 2.177145  | 0.348387  |
| H | -2.040177 | 1.976967  | -1.255302 |
| H | 2.115496  | 1.862212  | 1.340876  |
| H | 2.252035  | -2.908223 | 1.469025  |
| H | 2.634902  | -2.587681 | -0.222327 |
| H | -3.576879 | 0.374885  | -1.561396 |
| H | 0.494964  | -0.925963 | -2.823125 |
| H | 1.656816  | -1.982603 | -2.015928 |
| H | 0.035032  | -2.540906 | -2.324613 |
| H | 3.226707  | -0.961184 | -1.655662 |
| H | 2.357877  | 0.448539  | -2.248889 |
| H | -2.302221 | 0.841766  | 2.007590  |
| H | -2.680026 | -0.867961 | 1.770767  |
| H | -1.016595 | -0.346491 | 1.822861  |
| H | 3.745287  | 3.394169  | 0.258371  |
| H | 2.541118  | 2.916699  | -0.939910 |
| H | 5.001204  | -1.068709 | -0.237491 |
| H | 5.985617  | -0.788758 | 1.194632  |
| H | 5.010155  | -2.256567 | 1.076808  |
| H | 3.228012  | -0.141715 | 3.576746  |
| H | 3.832980  | -1.780521 | 3.275328  |
| H | 4.967569  | -0.432553 | 3.420599  |
| H | -4.861660 | 0.439831  | 2.235800  |
| H | -4.578785 | 2.889180  | -1.312359 |
| H | -6.145423 | 2.840523  | 2.464357  |



Equilibrium geometry of matopensine (13)

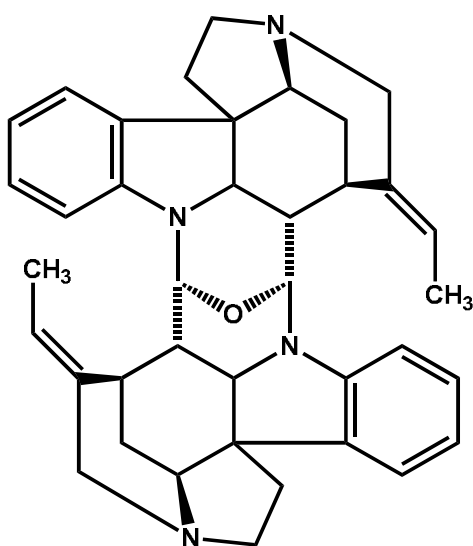

|   |           |           |           |
|---|-----------|-----------|-----------|
| O | 0.000000  | 0.000000  | 2.415838  |
| N | 0.546855  | 1.412037  | 0.641547  |
| N | 4.247457  | 0.364652  | -1.715275 |
| C | 1.879052  | 0.852221  | 0.956094  |
| C | 2.799674  | 1.501048  | -0.087960 |
| C | 1.859927  | -0.673920 | 1.053734  |
| C | -0.476838 | 1.081532  | 1.627294  |
| C | 2.841561  | 0.732739  | -1.468123 |
| C | 2.303187  | -1.370187 | -0.253873 |
| C | 1.950367  | -0.499241 | -1.463950 |
| C | 4.269070  | 1.553663  | 0.354113  |
| C | 2.119369  | 2.845074  | -0.208717 |
| C | 0.805144  | 2.738349  | 0.268427  |
| C | 5.040300  | 1.317412  | -0.944930 |
| C | 3.804224  | -1.652086 | -0.268249 |
| C | 4.542106  | -1.045264 | -1.439338 |
| C | 2.605494  | 4.050023  | -0.663790 |
| C | 0.000000  | 3.864512  | 0.354665  |
| C | 4.440341  | -2.415482 | 0.615797  |
| C | 1.785799  | 5.180175  | -0.620776 |
| C | 0.505448  | 5.081727  | -0.103897 |
| C | 3.837563  | -3.175576 | 1.757148  |
| H | 2.181287  | 1.251929  | 1.932946  |
| H | 2.575675  | -0.931796 | 1.831854  |
| H | -0.596729 | 1.915794  | 2.327130  |
| H | 2.524848  | 1.428037  | -2.246944 |
| H | 1.778277  | -2.316938 | -0.350937 |
| H | 2.084497  | -1.054191 | -2.391835 |
| H | 0.909952  | -0.202015 | -1.408751 |
| H | 4.472234  | 0.742463  | 1.055450  |
| H | 4.516037  | 2.494141  | 0.843009  |
| H | 5.110431  | 2.249952  | -1.510523 |
| H | 6.051591  | 0.946670  | -0.793746 |
| H | 4.282730  | -1.619586 | -2.332876 |

|   |           |           |           |
|---|-----------|-----------|-----------|
| H | 5.616942  | -1.153340 | -1.307126 |
| H | 3.621135  | 4.128114  | -1.030121 |
| H | -0.993146 | 3.826173  | 0.774801  |
| H | 5.514014  | -2.528033 | 0.500626  |
| H | 2.157480  | 6.132431  | -0.969505 |
| H | -0.117881 | 5.962617  | -0.043121 |
| H | 2.751226  | -3.136534 | 1.760808  |
| H | 4.133354  | -4.223873 | 1.712614  |
| H | 4.186895  | -2.790351 | 2.716985  |
| N | -0.546855 | -1.412037 | 0.641547  |
| N | -4.247457 | -0.364652 | -1.715275 |
| C | -1.879052 | -0.852221 | 0.956094  |
| C | -2.799674 | -1.501048 | -0.087960 |
| C | -1.859927 | 0.673920  | 1.053734  |
| C | 0.476838  | -1.081532 | 1.627294  |
| C | -2.841561 | -0.732739 | -1.468123 |
| C | -2.303187 | 1.370187  | -0.253873 |
| C | -1.950367 | 0.499241  | -1.463950 |
| C | -4.269070 | -1.553663 | 0.354113  |
| C | -2.119369 | -2.845074 | -0.208717 |
| C | -0.805144 | -2.738349 | 0.268427  |
| C | -5.040300 | -1.317412 | -0.944930 |
| C | -3.804224 | 1.652086  | -0.268249 |
| C | -4.542106 | 1.045264  | -1.439338 |
| C | -2.605494 | -4.050023 | -0.663790 |
| C | -0.000000 | -3.864512 | 0.354665  |
| C | -4.440341 | 2.415482  | 0.615797  |
| C | -1.785799 | -5.180175 | -0.620776 |
| C | -0.505448 | -5.081727 | -0.103897 |
| C | -3.837563 | 3.175576  | 1.757148  |
| H | -2.181287 | -1.251929 | 1.932946  |
| H | -2.575675 | 0.931796  | 1.831854  |
| H | 0.596729  | -1.915794 | 2.327130  |
| H | -2.524848 | -1.428037 | -2.246944 |
| H | -1.778277 | 2.316938  | -0.350937 |
| H | -2.084497 | 1.054191  | -2.391835 |
| H | -0.909952 | 0.202015  | -1.408751 |
| H | -4.472234 | -0.742463 | 1.055450  |
| H | -4.516037 | -2.494141 | 0.843009  |
| H | -5.110431 | -2.249952 | -1.510523 |
| H | -6.051591 | -0.946670 | -0.793746 |
| H | -4.282730 | 1.619586  | -2.332876 |
| H | -5.616942 | 1.153340  | -1.307126 |
| H | -3.621135 | -4.128114 | -1.030121 |
| H | 0.993146  | -3.826173 | 0.774801  |
| H | -5.514014 | 2.528033  | 0.500626  |
| H | -2.157480 | -6.132431 | -0.969505 |
| H | 0.117881  | -5.962617 | -0.043121 |
| H | -2.751226 | 3.136534  | 1.760808  |
| H | -4.133354 | 4.223873  | 1.712614  |
| H | -4.186895 | 2.790351  | 2.716985  |

Equilibrium geometry of mulberrofuran G (14)

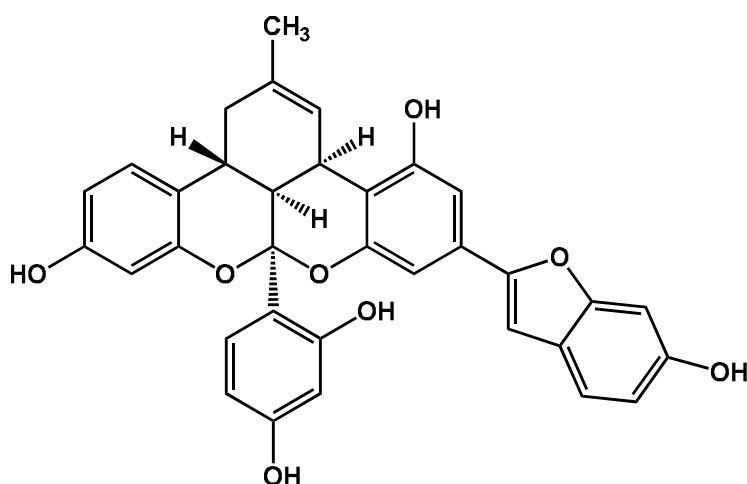

|   |           |           |           |
|---|-----------|-----------|-----------|
| O | -3.167348 | 0.347493  | -1.355271 |
| O | -1.054098 | -0.147690 | -0.756672 |
| O | 0.923959  | 0.691685  | 3.547273  |
| O | -0.594341 | 1.964002  | -2.281951 |
| O | -5.922384 | -2.490449 | -3.848427 |
| O | 4.774994  | -0.265103 | 0.642972  |
| O | -1.468443 | 6.208455  | -0.275245 |
| O | 9.504759  | -0.809774 | -0.154773 |
| C | -2.644899 | -0.023646 | 0.993124  |
| C | -2.845861 | -1.532871 | 0.822177  |
| C | -1.582552 | 0.259587  | 2.065746  |
| C | -2.215317 | 0.573471  | -0.346602 |
| C | -3.428336 | -2.106211 | 2.106569  |
| C | -3.676832 | -1.822157 | -0.401980 |
| C | -0.185117 | 0.159255  | 1.469000  |
| C | -1.796354 | -0.643441 | 3.264892  |
| C | -2.645041 | -1.666229 | 3.310813  |
| C | -1.969520 | 2.074439  | -0.336852 |
| C | -3.777459 | -0.878210 | -1.420655 |
| C | 0.001246  | -0.091682 | 0.105326  |
| C | 0.972294  | 0.322635  | 2.234918  |
| C | -4.357778 | -3.022584 | -0.585057 |
| C | -2.873886 | -2.458366 | 4.562758  |
| C | 1.254385  | -0.300558 | -0.445877 |
| C | -4.529572 | -1.105149 | -2.564147 |
| C | -1.176557 | 2.703538  | -1.305803 |
| C | -2.606208 | 2.893575  | 0.593020  |
| C | 2.237269  | 0.114675  | 1.708088  |
| C | 2.381454  | -0.225417 | 0.366533  |
| C | -5.110571 | -3.280697 | -1.718018 |
| C | -5.196751 | -2.309483 | -2.709765 |
| C | -0.993954 | 4.083168  | -1.286378 |
| C | -2.447434 | 4.266013  | 0.618179  |
| C | -1.621426 | 4.860889  | -0.326817 |
| C | 3.703304  | -0.469864 | -0.196001 |

|   |           |           |           |
|---|-----------|-----------|-----------|
| C | 4.114963  | -0.885380 | -1.416676 |
| C | 5.550090  | -0.954011 | -1.362703 |
| C | 5.891041  | -0.559735 | -0.068398 |
| C | 6.576851  | -1.301947 | -2.244083 |
| C | 7.189551  | -0.487021 | 0.405879  |
| C | 7.882700  | -1.240832 | -1.802750 |
| C | 8.184528  | -0.837041 | -0.493029 |
| H | -3.598689 | 0.412467  | 1.296316  |
| H | -1.858712 | -1.986352 | 0.686704  |
| H | -1.717949 | 1.288762  | 2.416273  |
| H | -3.424005 | -3.197423 | 2.074354  |
| H | -4.477293 | -1.808209 | 2.215547  |
| H | -1.250600 | -0.407082 | 4.170524  |
| H | -4.299578 | -3.784831 | 0.180226  |
| H | -3.933814 | -2.448826 | 4.827406  |
| H | -2.302969 | -2.064426 | 5.401412  |
| H | -2.596962 | -3.503481 | 4.409102  |
| H | 1.326440  | -0.496352 | -1.505955 |
| H | -4.589738 | -0.346447 | -3.331649 |
| H | -3.264111 | 2.451681  | 1.327571  |
| H | 3.096223  | 0.231806  | 2.351871  |
| H | -5.627593 | -4.224451 | -1.833245 |
| H | -0.365438 | 4.547096  | -2.037828 |
| H | -2.950454 | 4.877212  | 1.352916  |
| H | 0.064585  | 1.063562  | 3.765670  |
| H | -0.102523 | 2.541083  | -2.875459 |
| H | -6.336596 | -3.359271 | -3.838817 |
| H | 3.482061  | -1.125806 | -2.253454 |
| H | -0.881823 | 6.508525  | -0.977380 |
| H | 6.357782  | -1.614038 | -3.255933 |
| H | 7.412617  | -0.177742 | 1.417948  |
| H | 8.703427  | -1.502551 | -2.455820 |
| H | 9.609413  | -0.516138 | 0.755875  |

Equilibrium geometry of 1 $\alpha$ ,8 $\beta$ ,9 $\beta$ ,14 $\alpha$ ,15 $\beta$ -pentaacetoxy-3 $\beta$ -benzoyloxy-7-oxojatropha-5,12-  
diene (15)

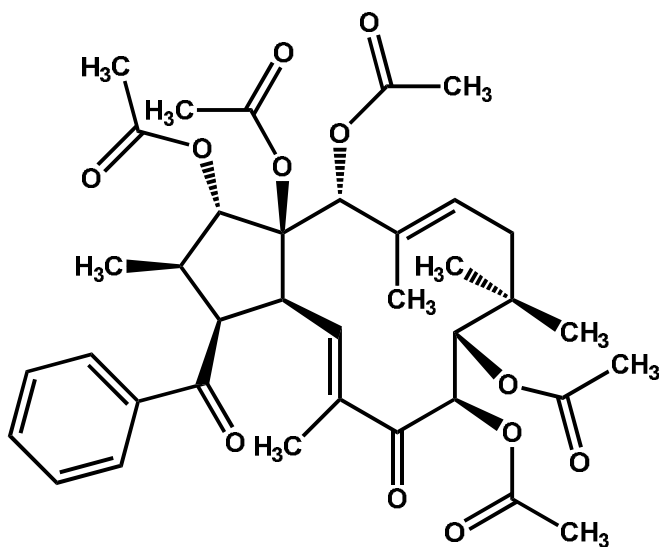

|   |           |           |           |
|---|-----------|-----------|-----------|
| C | 2.975370  | 0.820288  | -0.836379 |
| C | 3.275052  | -0.352941 | 0.102683  |
| C | 1.901057  | -0.812702 | 0.709248  |
| C | 0.891778  | 0.253588  | 0.211829  |
| C | 1.757576  | 1.456967  | -0.172784 |
| C | 4.148682  | 1.766222  | -1.028125 |
| O | 2.149733  | 2.132976  | 1.031543  |
| C | 2.437976  | 3.449153  | 1.064568  |
| O | 3.270409  | 3.841679  | 1.834816  |
| C | 1.659956  | 4.377146  | 0.192231  |
| C | 2.327701  | 5.457142  | -0.374509 |
| C | 1.627396  | 6.379596  | -1.135199 |
| C | 0.256276  | 6.240108  | -1.304103 |
| C | -0.414311 | 5.173556  | -0.719985 |
| C | 0.286528  | 4.233619  | 0.018975  |
| O | 4.096083  | -1.422722 | -0.341328 |
| C | 4.204528  | -2.024529 | -1.544010 |
| O | 4.553853  | -3.174927 | -1.540750 |
| C | 3.977093  | -1.275413 | -2.826441 |
| O | 1.932449  | -0.692973 | 2.137064  |
| C | 2.832435  | -1.359577 | 2.885592  |
| O | 3.615701  | -2.149056 | 2.437821  |
| C | 2.712372  | -0.963548 | 4.325346  |
| C | 1.492602  | -2.247263 | 0.309544  |
| C | 0.185144  | -2.722896 | 0.916646  |
| C | 0.313953  | -3.282311 | 2.310673  |
| C | -0.996496 | -2.745460 | 0.299815  |
| O | 1.467740  | -2.230509 | -1.120077 |
| C | 1.531788  | -3.376366 | -1.841642 |
| O | 1.421819  | -3.279192 | -3.032424 |
| C | 1.749434  | -4.669110 | -1.114733 |
| C | -1.376214 | -2.287195 | -1.085998 |

|   |           |           |           |
|---|-----------|-----------|-----------|
| C | -2.882851 | -2.179805 | -1.401700 |
| C | -3.655992 | -1.129150 | -0.582371 |
| C | -3.569685 | -3.528448 | -1.158462 |
| C | -3.013941 | -1.831037 | -2.888504 |
| O | -3.457446 | -1.360890 | 0.805922  |
| C | -4.448156 | -1.605190 | 1.688963  |
| O | -4.135759 | -1.762669 | 2.836197  |
| C | -5.866047 | -1.670942 | 1.196755  |
| C | -3.375768 | 0.353104  | -0.859705 |
| C | -1.956906 | 0.848839  | -0.524028 |
| C | -1.476884 | 0.928930  | 0.884209  |
| O | -1.253256 | 1.164284  | -1.460146 |
| O | -4.363983 | 1.047723  | -0.102977 |
| C | -4.766123 | 2.304678  | -0.412968 |
| O | -5.548267 | 2.831466  | 0.323395  |
| C | -4.227192 | 2.935524  | -1.664477 |
| C | -0.205106 | 0.618281  | 1.159810  |
| C | -2.406512 | 1.378228  | 1.980763  |
| H | 2.609415  | 0.459611  | -1.794160 |
| H | 3.838973  | 0.054863  | 0.940655  |
| H | 0.495307  | -0.106304 | -0.732267 |
| H | 1.229919  | 2.130617  | -0.839949 |
| H | 5.003114  | 1.257986  | -1.470355 |
| H | 3.876627  | 2.597190  | -1.678467 |
| H | 4.475440  | 2.168201  | -0.069756 |
| H | 3.390891  | 5.564151  | -0.212961 |
| H | 2.147810  | 7.211068  | -1.587346 |
| H | -0.291575 | 6.966071  | -1.887431 |
| H | -1.483443 | 5.076262  | -0.839691 |
| H | -0.230460 | 3.398120  | 0.473375  |
| H | 2.295799  | -2.904483 | 0.641395  |
| H | 0.424285  | -2.489296 | 3.049907  |
| H | -0.571198 | -3.853733 | 2.576725  |
| H | 1.186878  | -3.931794 | 2.395602  |
| H | -1.799646 | -3.187260 | 0.874649  |
| H | -0.997294 | -3.012320 | -1.812408 |
| H | -0.884241 | -1.355601 | -1.350630 |
| H | -4.709039 | -1.250452 | -0.836817 |
| H | -3.623386 | -3.783646 | -0.101196 |
| H | -4.585218 | -3.516536 | -1.555949 |
| H | -3.020942 | -4.321099 | -1.665650 |
| H | -2.667360 | -2.669002 | -3.491136 |
| H | -4.051875 | -1.631960 | -3.159107 |
| H | -2.411489 | -0.962440 | -3.153228 |
| H | -3.514153 | 0.532047  | -1.923276 |
| H | 0.091754  | 0.671985  | 2.198816  |
| H | -3.227212 | 0.686050  | 2.138702  |
| H | -1.847913 | 1.468206  | 2.908613  |
| H | -2.842018 | 2.351856  | 1.752760  |
| H | 4.426261  | -1.859337 | -3.621805 |
| H | 2.908794  | -1.202358 | -3.019455 |

|   |           |           |           |
|---|-----------|-----------|-----------|
| H | 4.410962  | -0.282114 | -2.803762 |
| H | 3.361337  | -1.586311 | 4.929094  |
| H | 2.997838  | 0.082049  | 4.427611  |
| H | 1.679800  | -1.056872 | 4.654112  |
| H | 2.716495  | -4.646348 | -0.615253 |
| H | 0.974102  | -4.828005 | -0.368104 |
| H | 1.738099  | -5.471052 | -1.842670 |
| H | -6.501862 | -1.883461 | 2.047237  |
| H | -6.156006 | -0.723144 | 0.748019  |
| H | -5.982739 | -2.455775 | 0.451220  |
| H | -4.580659 | 3.958332  | -1.705717 |
| H | -3.140186 | 2.913630  | -1.694630 |
| H | -4.591653 | 2.394357  | -2.536919 |

Equilibrium geometry of pedunculagin (16)

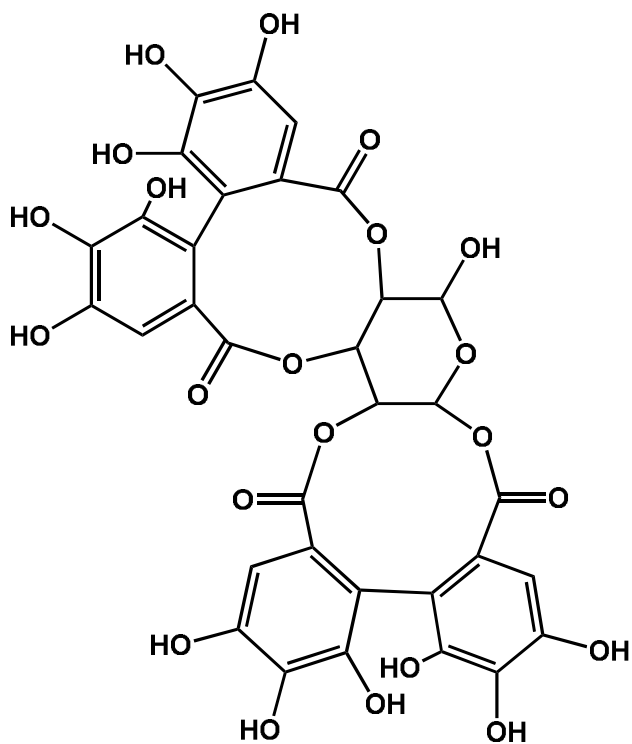

|   |           |           |           |
|---|-----------|-----------|-----------|
| O | -3.109212 | -2.666988 | -0.936707 |
| C | -4.103065 | -2.063602 | -0.257714 |
| C | -4.650483 | -0.894947 | -1.006124 |
| O | -4.494237 | -2.421603 | 0.821285  |
| C | -2.374676 | -3.689140 | -0.250169 |
| C | -0.640452 | -1.812589 | -0.179639 |
| C | -0.901401 | -3.318478 | -0.119155 |
| O | -0.171945 | -3.935345 | -1.179194 |
| C | 1.216644  | -3.818180 | -1.067534 |
| C | 1.604392  | -2.341258 | -1.040349 |
| C | 0.837089  | -1.591533 | 0.048396  |
| H | 1.631347  | -4.296636 | -1.955915 |
| O | 1.631323  | -4.478527 | 0.099721  |

|   |           |           |           |
|---|-----------|-----------|-----------|
| O | 2.994479  | -2.235349 | -0.742386 |
| C | 3.676528  | -1.185299 | -1.274375 |
| O | 3.314139  | -0.594384 | -2.252274 |
| C | 4.873889  | -0.861211 | -0.451788 |
| C | 5.718370  | -1.904255 | -0.096870 |
| C | 6.849105  | -1.651533 | 0.656868  |
| C | 7.113098  | -0.351256 | 1.064496  |
| C | 6.250188  | 0.685944  | 0.730530  |
| C | 5.098435  | 0.457677  | -0.026725 |
| O | 1.159808  | -0.208431 | -0.083712 |
| C | 2.205162  | 0.260220  | 0.637092  |
| O | 2.630031  | -0.274554 | 1.623400  |
| C | 2.766514  | 1.487856  | 0.004417  |
| C | 4.138176  | 1.569214  | -0.277082 |
| C | 4.581685  | 2.749016  | -0.872431 |
| C | 3.715968  | 3.791427  | -1.170774 |
| C | 2.361752  | 3.671471  | -0.898002 |
| C | 1.883603  | 2.508659  | -0.321494 |
| O | 5.904167  | 2.893964  | -1.175596 |
| O | 4.250095  | 4.899294  | -1.743440 |
| O | 1.602866  | 4.745085  | -1.236824 |
| O | 6.595365  | 1.900617  | 1.250547  |
| O | 8.230314  | -0.134644 | 1.800691  |
| O | 7.691762  | -2.660344 | 0.984529  |
| O | -1.427352 | -1.182547 | 0.826379  |
| C | -2.102348 | -0.068015 | 0.461598  |
| C | -3.130680 | 0.302777  | 1.471999  |
| O | -1.905855 | 0.515693  | -0.569156 |
| C | -2.750761 | 0.386472  | 2.803627  |
| C | -3.670863 | 0.789276  | 3.755180  |
| C | -4.966422 | 1.097655  | 3.361274  |
| C | -5.347889 | 0.985174  | 2.029350  |
| C | -4.443603 | 0.565141  | 1.054719  |
| C | -4.887407 | 0.317501  | -0.342338 |
| C | -5.492019 | 1.332251  | -1.078013 |
| C | -5.829947 | 1.163448  | -2.413534 |
| C | -5.551073 | -0.034314 | -3.054611 |
| C | -4.952954 | -1.064721 | -2.350457 |
| O | -3.305009 | 0.898652  | 5.055401  |
| O | -5.838153 | 1.500361  | 4.318752  |
| O | -6.662704 | 1.257399  | 1.783783  |
| O | -5.757031 | 2.528044  | -0.477552 |
| O | -6.417251 | 2.209773  | -3.045881 |
| O | -5.913910 | -0.090802 | -4.362497 |
| H | -2.458503 | -4.607659 | -0.826742 |
| H | -2.812739 | -3.834020 | 0.731424  |
| H | -0.931708 | -1.428886 | -1.156237 |
| H | -0.540768 | -3.712046 | 0.833318  |
| H | 1.395723  | -1.896494 | -2.012393 |
| H | 1.128245  | -1.943099 | 1.037815  |
| H | 2.559087  | -4.272941 | 0.265018  |



|   |           |           |           |
|---|-----------|-----------|-----------|
| H | 5.512928  | -2.915959 | -0.416713 |
| H | 0.826506  | 2.400720  | -0.115840 |
| H | 6.037525  | 3.742829  | -1.619659 |
| H | 3.549665  | 5.537331  | -1.930695 |
| H | 0.675356  | 4.592633  | -1.027450 |
| H | 6.528679  | 2.572308  | 0.553083  |
| H | 8.288207  | 0.810793  | 1.996084  |
| H | 8.422107  | -2.304691 | 1.506462  |
| H | -1.738162 | 0.160848  | 3.107088  |
| H | -4.746226 | -2.006286 | -2.841280 |
| H | -4.065501 | 1.191928  | 5.573233  |
| H | -6.685642 | 1.699119  | 3.897984  |
| H | -6.729264 | 1.800826  | 0.983221  |
| H | -6.145029 | 3.131936  | -1.125595 |
| H | -6.583880 | 1.977768  | -3.968542 |
| H | -5.698815 | -0.948312 | -4.744010 |

Equilibrium geometry of phyllaemblicin B (17)

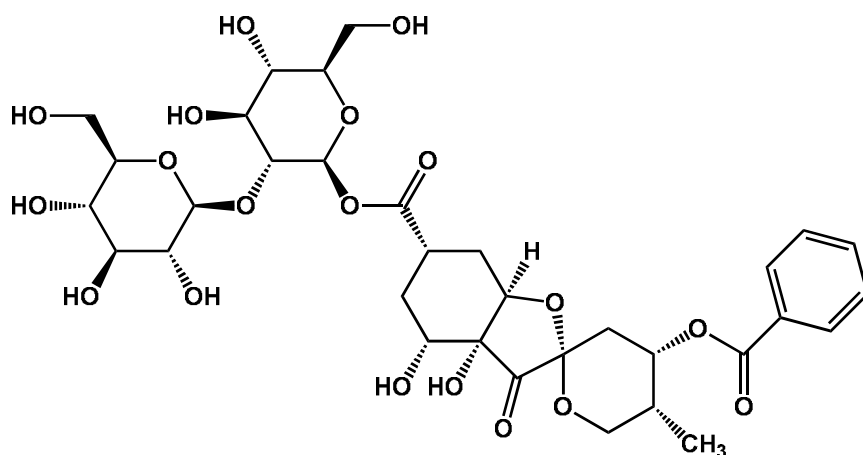

|   |           |           |           |
|---|-----------|-----------|-----------|
| C | 5.952244  | -2.751371 | -0.697872 |
| C | 4.773768  | -3.099797 | -1.597719 |
| O | 3.563632  | -2.830077 | -0.898154 |
| C | 3.418332  | -1.475716 | -0.577265 |
| C | 4.507550  | -1.051135 | 0.403427  |
| C | 5.867931  | -1.298572 | -0.250431 |
| O | 4.298900  | 0.277948  | 0.859859  |
| C | 4.679863  | 1.312113  | 0.019796  |
| O | 6.044114  | 1.583679  | 0.247160  |
| C | 6.561631  | 2.593951  | -0.605742 |
| C | 5.830694  | 3.902892  | -0.327926 |
| C | 4.331446  | 3.700781  | -0.483956 |
| C | 3.855383  | 2.538725  | 0.367438  |
| O | 2.171766  | -1.329791 | 0.060043  |
| C | 1.079243  | -1.299727 | -0.739613 |
| C | -0.192042 | -1.228895 | 0.061521  |
| O | 1.145617  | -1.335864 | -1.937619 |
| C | -0.391865 | -2.522047 | 0.860732  |

|   |            |           |           |
|---|------------|-----------|-----------|
| C | -1.750839  | -2.508800 | 1.542279  |
| C | -1.911768  | -1.286637 | 2.469655  |
| C | -1.462192  | 0.034016  | 1.834740  |
| C | -0.193870  | -0.031895 | 1.013869  |
| O | -2.569037  | 0.391167  | 0.999115  |
| C | -3.766332  | 0.146783  | 1.701007  |
| C | -3.403045  | -1.018246 | 2.634439  |
| O | -4.129301  | -1.568583 | 3.409721  |
| C | -4.919043  | -0.118254 | 0.732066  |
| C | -5.911285  | 1.037127  | 0.787863  |
| C | -5.203022  | 2.384526  | 0.733795  |
| C | -4.258924  | 2.461971  | 1.952773  |
| O | -4.061449  | 1.194992  | 2.589374  |
| C | -4.465186  | 2.618940  | -0.582339 |
| O | -6.811538  | 0.979527  | -0.329347 |
| C | -7.819343  | 0.105174  | -0.270888 |
| O | -7.991108  | -0.651545 | 0.654395  |
| C | -8.703990  | 0.176746  | -1.465885 |
| C | -9.765147  | -0.719517 | -1.552504 |
| C | -10.617741 | -0.678638 | -2.643655 |
| C | -10.412440 | 0.259065  | -3.648772 |
| C | -9.353488  | 1.153949  | -3.563685 |
| C | -8.496606  | 1.114007  | -2.474485 |
| C | 8.041058   | 2.674847  | -0.322400 |
| O | 8.578882   | 1.383745  | -0.563820 |
| C | 4.762594   | -4.547798 | -2.025668 |
| O | 4.833967   | -5.372676 | -0.875594 |
| O | 2.489134   | 2.322366  | 0.089665  |
| O | 3.710239   | 4.916829  | -0.119443 |
| O | 6.304901   | 4.876871  | -1.231913 |
| O | 6.948620   | -1.066903 | 0.623331  |
| O | 7.142540   | -2.972208 | -1.421984 |
| H | -0.331171  | -3.395814 | 0.209416  |
| O | -1.251518  | -1.492866 | 3.687238  |
| H | 5.915553   | -3.391109 | 0.189976  |
| H | 4.821206   | -2.481585 | -2.503437 |
| H | 3.430273   | -0.869633 | -1.489401 |
| H | 4.420473   | -1.675098 | 1.294147  |
| H | 5.970420   | -0.669908 | -1.143991 |
| H | 4.526172   | 1.056398  | -1.038550 |
| H | 6.406725   | 2.306788  | -1.654388 |
| H | 6.032629   | 4.204831  | 0.707389  |
| H | 4.120089   | 3.470630  | -1.536052 |
| H | 4.012578   | 2.767295  | 1.427160  |
| H | -0.997950  | -1.126224 | -0.663206 |
| H | 0.388048   | -2.617327 | 1.618480  |
| O | -2.813285  | -2.464194 | 0.599601  |
| H | -1.855352  | -3.390984 | 2.181067  |
| H | -1.347620  | 0.773039  | 2.632611  |
| H | -0.094083  | 0.906841  | 0.465510  |
| H | 0.646886   | -0.116518 | 1.706077  |

|   |            |           |           |
|---|------------|-----------|-----------|
| H | -5.417772  | -1.048240 | 0.998302  |
| H | -4.517300  | -0.224755 | -0.273677 |
| H | -6.501466  | 0.969471  | 1.700992  |
| H | -5.964750  | 3.156898  | 0.844088  |
| H | -4.674649  | 3.094103  | 2.733063  |
| H | -3.290648  | 2.867773  | 1.652918  |
| H | -4.026725  | 3.616693  | -0.583007 |
| H | -3.656526  | 1.901344  | -0.718845 |
| H | -5.144287  | 2.546960  | -1.430515 |
| H | -9.910368  | -1.441100 | -0.760758 |
| H | -11.441255 | -1.375728 | -2.711888 |
| H | -11.078753 | 0.291644  | -4.500107 |
| H | -9.195982  | 1.883690  | -4.345653 |
| H | -7.671639  | 1.807726  | -2.401561 |
| H | 8.490840   | 3.426331  | -0.972808 |
| H | 8.190339   | 2.968320  | 0.720911  |
| H | 9.525110   | 1.402576  | -0.397570 |
| H | 3.843339   | -4.734653 | -2.585889 |
| H | 5.617327   | -4.716562 | -2.684092 |
| H | 4.786936   | -6.290806 | -1.153828 |
| H | 2.183431   | 1.605935  | 0.657286  |
| H | 2.764188   | 4.838611  | -0.280401 |
| H | 5.752061   | 5.660455  | -1.135177 |
| H | 7.194864   | -0.133340 | 0.547843  |
| H | 7.863354   | -2.598530 | -0.901606 |
| H | -1.752521  | -2.133696 | 4.207419  |
| H | -2.854052  | -3.303475 | 0.131165  |

Equilibrium geometry of physalin D (**18**)

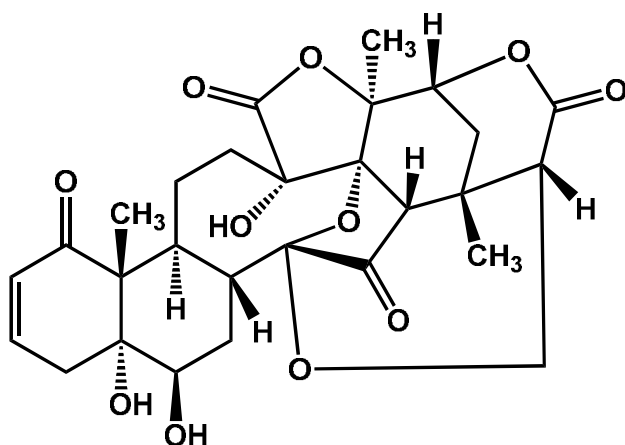

|   |           |           |           |
|---|-----------|-----------|-----------|
| C | -5.942961 | 0.451842  | -0.844269 |
| C | -5.339127 | -0.918064 | -0.866466 |
| C | -3.816483 | -0.873677 | -0.762625 |
| C | -3.361891 | 0.087839  | 0.379363  |
| C | -3.842978 | 1.457936  | -0.101098 |
| C | -5.265122 | 1.544774  | -0.490017 |
| C | -3.216241 | -2.271138 | -0.621847 |

|   |           |           |           |
|---|-----------|-----------|-----------|
| C | -1.699852 | -2.199479 | -0.548163 |
| C | -1.212279 | -1.299199 | 0.588303  |
| C | -1.824672 | 0.114374  | 0.501054  |
| O | -3.108913 | 2.425727  | -0.205480 |
| C | 0.307331  | -1.182450 | 0.515089  |
| C | 1.010103  | -0.636587 | 1.759106  |
| C | 2.111234  | 0.237686  | 1.238901  |
| C | 1.473145  | 0.755046  | -0.057834 |
| C | 0.592769  | 2.006121  | 0.206053  |
| C | -0.218495 | 2.048952  | 1.491462  |
| C | -1.394387 | 1.042271  | 1.670167  |
| O | 0.775126  | -0.948768 | 2.892455  |
| O | 0.704964  | -0.334051 | -0.541344 |
| O | 0.910469  | -2.458193 | 0.368455  |
| C | 3.417448  | -0.576228 | 1.037266  |
| C | 3.377784  | -1.831015 | 0.088419  |
| C | 2.058099  | -2.505648 | -0.448132 |
| C | 4.391922  | 0.433374  | 0.433784  |
| C | 3.947984  | 0.736883  | -0.975393 |
| C | 2.508288  | 1.284712  | -1.089467 |
| C | 1.671218  | 3.091202  | 0.135514  |
| O | 2.665883  | 2.668850  | -0.665479 |
| O | 1.667217  | 4.177573  | 0.633586  |
| C | 4.122298  | -1.648507 | -1.219826 |
| O | 4.133349  | -0.433468 | -1.787566 |
| C | 2.041556  | 1.224099  | -2.530865 |
| O | 4.584877  | -2.578460 | -1.826564 |
| C | 3.913177  | -1.028380 | 2.410796  |
| O | -3.270989 | -0.401122 | -1.999480 |
| O | -3.774689 | -2.886881 | 0.528807  |
| C | -4.044088 | -0.223055 | 1.728073  |
| O | -0.225352 | 2.278280  | -0.920153 |
| H | -6.973659 | 0.543801  | -1.165427 |
| H | -5.608622 | -1.422175 | -1.797909 |
| H | -5.762334 | -1.523057 | -0.062548 |
| H | -5.699553 | 2.534065  | -0.544118 |
| H | -3.507035 | -2.825950 | -1.519677 |
| H | -1.323072 | -1.820918 | -1.499921 |
| H | -1.304987 | -3.206901 | -0.420771 |
| H | -1.449819 | -1.759686 | 1.551760  |
| H | -1.473576 | 0.511478  | -0.443733 |
| H | 2.344312  | 1.026828  | 1.951589  |
| H | -0.624647 | 3.061818  | 1.522635  |
| H | 0.450319  | 1.987466  | 2.349074  |
| H | -2.242577 | 1.657419  | 1.945889  |
| H | -1.195903 | 0.422713  | 2.542867  |
| H | 3.916452  | -2.615315 | 0.615105  |
| H | 2.281338  | -3.561973 | -0.564387 |
| H | 1.815303  | -2.107128 | -1.431663 |
| H | 4.414784  | 1.346028  | 1.028946  |
| H | 5.406569  | 0.030938  | 0.406906  |

|   |           |           |           |
|---|-----------|-----------|-----------|
| H | 4.584476  | 1.489640  | -1.437268 |
| H | 2.823989  | 1.620019  | -3.177618 |
| H | 1.849995  | 0.190548  | -2.811914 |
| H | 1.131541  | 1.798149  | -2.662976 |
| H | 3.976079  | -0.181612 | 3.094802  |
| H | 3.248504  | -1.773846 | 2.846705  |
| H | 4.906120  | -1.467743 | 2.316418  |
| H | -3.860321 | 0.255550  | -2.385161 |
| H | -3.442960 | -3.788049 | 0.581918  |
| H | -3.609107 | -1.115058 | 2.170414  |
| H | -3.919211 | 0.604119  | 2.423748  |
| H | -5.111667 | -0.389961 | 1.616300  |
| H | -1.130928 | 2.460779  | -0.621948 |

Equilibrium geometry of procyanidin B2 (19)

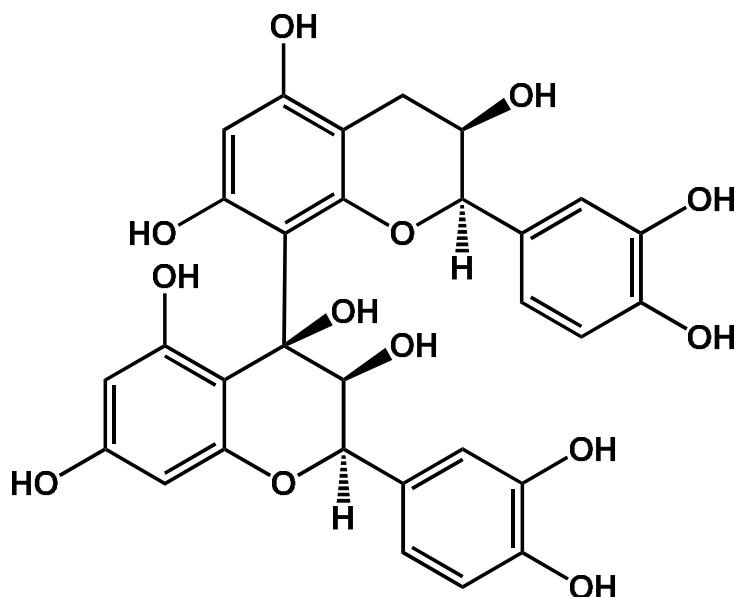

|   |           |           |           |
|---|-----------|-----------|-----------|
| C | 1.259532  | 3.094442  | 0.552592  |
| C | 0.671982  | 4.344187  | 0.683580  |
| C | -0.702691 | 4.458426  | 0.569712  |
| C | -1.511641 | 3.352246  | 0.304461  |
| C | -0.882536 | 2.113959  | 0.197607  |
| C | 0.499785  | 1.941846  | 0.343059  |
| C | -2.999874 | 3.495927  | 0.112038  |
| C | -3.596386 | 2.240910  | -0.514988 |
| C | -3.005355 | 1.028455  | 0.190522  |
| O | -1.595967 | 0.989463  | -0.094446 |
| O | -1.225256 | 5.702966  | 0.712051  |
| O | 2.610516  | 2.945403  | 0.631377  |
| C | -3.561560 | -0.316830 | -0.201850 |
| C | -4.664621 | -0.460068 | -1.037043 |
| C | -2.950588 | -1.451199 | 0.319261  |
| C | -3.426620 | -2.716775 | 0.010366  |
| C | -4.526032 | -2.853517 | -0.819066 |

|   |           |           |           |
|---|-----------|-----------|-----------|
| C | -5.148074 | -1.720726 | -1.341483 |
| O | -6.227025 | -1.847847 | -2.161537 |
| O | -5.076169 | -4.047936 | -1.186807 |
| C | 1.182313  | 0.595443  | 0.208047  |
| C | 1.245163  | 0.194185  | -1.265893 |
| C | 0.610074  | -0.552279 | 1.021478  |
| C | 0.608657  | -1.846424 | 0.501223  |
| O | 1.095986  | -2.151337 | -0.736666 |
| C | 1.891409  | -1.188330 | -1.418160 |
| C | 0.127912  | -0.407333 | 2.330680  |
| C | -0.369265 | -1.478254 | 3.058407  |
| C | -0.373962 | -2.742215 | 2.488779  |
| C | 0.119694  | -2.938993 | 1.211024  |
| C | 3.342558  | -1.230777 | -0.992926 |
| C | 3.747658  | -1.730180 | 0.238066  |
| C | 4.305128  | -0.730450 | -1.871486 |
| C | 5.640506  | -0.709609 | -1.517409 |
| C | 5.092168  | -1.715697 | 0.595322  |
| C | 6.036189  | -1.202697 | -0.272330 |
| O | 7.375996  | -1.144107 | -0.018248 |
| O | 6.564528  | -0.220947 | -2.385548 |
| H | -2.184964 | 5.683120  | 0.639349  |
| H | 3.026275  | 3.795059  | 0.810677  |
| H | 1.269191  | 5.227048  | 0.868382  |
| H | -3.227713 | 4.334006  | -0.550823 |
| H | -3.495087 | 3.688469  | 1.067881  |
| H | -3.117548 | 1.169487  | 1.271645  |
| H | -6.422599 | -2.786442 | -2.272321 |
| H | -4.584097 | -4.781535 | -0.804946 |
| H | 2.217131  | 0.739453  | 0.534391  |
| H | 0.147370  | -3.919550 | 0.755209  |
| H | 1.829022  | -1.464442 | -2.470584 |
| H | 4.023987  | -0.362847 | -2.850137 |
| H | 3.028849  | -2.145680 | 0.929273  |
| H | 5.408089  | -2.108637 | 1.553521  |
| H | 7.437979  | -0.290261 | -1.980098 |
| H | 7.575448  | -1.504009 | 0.851939  |
| H | -2.944783 | -3.598729 | 0.416090  |
| H | -2.092388 | -1.345830 | 0.968455  |
| H | -5.159031 | 0.393005  | -1.479868 |
| O | -3.349142 | 2.187549  | -1.907932 |
| H | -2.451817 | 1.864877  | -2.051935 |
| H | -4.677686 | 2.253240  | -0.388026 |
| O | 1.908005  | 1.163701  | -2.045327 |
| H | 2.727891  | 1.415863  | -1.603821 |
| H | -0.744603 | -1.321568 | 4.058981  |
| O | -0.876265 | -3.762372 | 3.236811  |
| H | -0.821051 | -4.589314 | 2.747113  |
| O | 0.130621  | 0.788464  | 2.978158  |
| H | 0.345097  | 1.504586  | 2.365299  |
| H | 0.231275  | 0.120580  | -1.662277 |

Equilibrium geometry of strychnine (20)

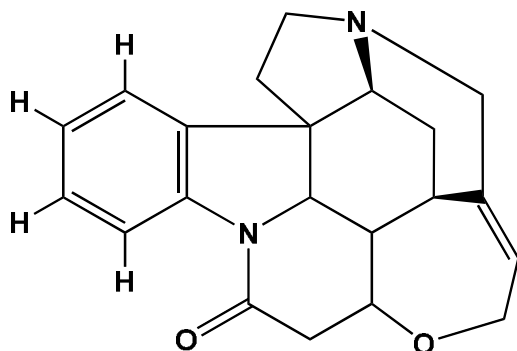

|   |           |          |           |
|---|-----------|----------|-----------|
| O | -0.433610 | 6.038797 | -0.009786 |
| O | 4.162485  | 6.001808 | 0.994590  |
| N | 2.533037  | 4.897923 | 2.166640  |
| N | -1.182535 | 2.443235 | 3.222202  |
| C | 0.189887  | 2.081242 | 2.770606  |
| C | 0.232166  | 1.747976 | 1.287865  |
| C | -0.223225 | 2.975923 | 0.497402  |
| C | 0.881655  | 4.023668 | 0.660817  |
| C | 1.134892  | 4.409428 | 2.116061  |
| C | 3.338655  | 3.961534 | 2.841997  |
| C | 4.725223  | 3.944259 | 2.986813  |
| C | 5.287136  | 2.877452 | 3.693057  |
| C | 4.492928  | 1.868911 | 4.241361  |
| C | 3.103674  | 1.909748 | 4.098095  |
| C | 2.530735  | 2.960597 | 3.392051  |
| C | 1.083047  | 3.272531 | 3.166100  |
| C | 0.365431  | 3.755082 | 4.436022  |
| C | -1.095176 | 3.680074 | 4.019419  |
| C | -2.142351 | 2.566483 | 2.116735  |
| C | -1.585913 | 3.406475 | 1.002781  |
| C | -2.213573 | 4.486199 | 0.515471  |
| C | -1.580067 | 5.353261 | -0.528550 |
| C | 0.791555  | 5.323477 | -0.145598 |
| C | 1.859095  | 6.322318 | 0.343125  |
| C | 2.974146  | 5.733260 | 1.173485  |
| H | 0.528954  | 1.215432 | 3.347011  |
| H | -0.402002 | 0.885077 | 1.081933  |
| H | 1.251190  | 1.470764 | 1.009118  |
| H | -0.298540 | 2.728641 | -0.567707 |
| H | 1.800771  | 3.535868 | 0.308249  |
| H | 0.453314  | 5.217219 | 2.395731  |
| H | 5.334142  | 4.724921 | 2.562209  |
| H | 6.361323  | 2.838028 | 3.814471  |
| H | 4.954744  | 1.055862 | 4.784347  |
| H | 2.485285  | 1.135557 | 4.534824  |
| H | 0.572158  | 3.058375 | 5.250661  |
| H | 0.680491  | 4.753756 | 4.739421  |
| H | -1.777927 | 3.637917 | 4.867963  |

|   |           |          |           |
|---|-----------|----------|-----------|
| H | -1.361424 | 4.558083 | 3.415356  |
| H | -3.061135 | 3.003377 | 2.509436  |
| H | -2.391182 | 1.566830 | 1.754289  |
| H | -3.182228 | 4.770032 | 0.910912  |
| H | -1.284477 | 4.765429 | -1.405329 |
| H | -2.266070 | 6.130165 | -0.858329 |
| H | 0.942686  | 5.089714 | -1.205493 |
| H | 2.305773  | 6.873105 | -0.479305 |
| H | 1.329257  | 7.038595 | 0.976108  |

Equilibrium geometry of strychnobailonine (21)

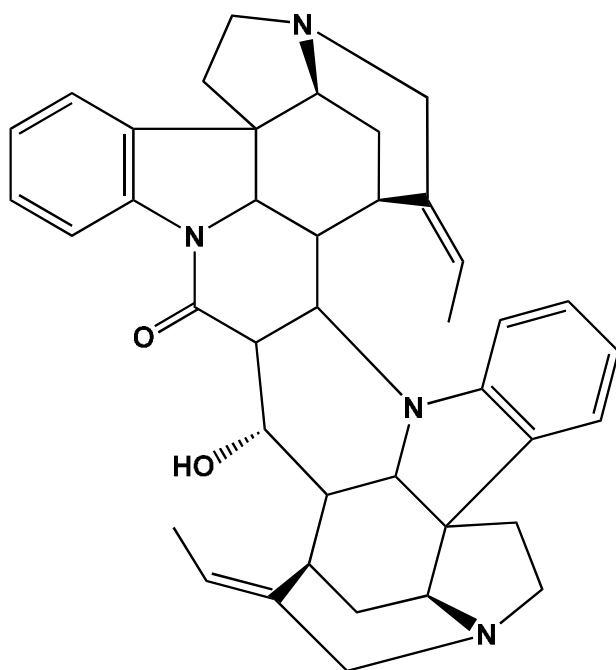

|   |           |           |           |
|---|-----------|-----------|-----------|
| O | 1.226924  | 2.680840  | 1.849197  |
| O | -1.111705 | 3.429238  | 0.772890  |
| N | -2.304949 | 1.611534  | 0.132811  |
| N | -4.644151 | -2.384122 | -0.240140 |
| N | 1.116773  | -0.748764 | 0.319312  |
| N | 5.200814  | -0.129625 | -1.459283 |
| C | -5.376803 | 3.624259  | 0.823201  |
| C | -6.304697 | 2.692637  | 0.378494  |
| C | -5.880006 | 1.459546  | -0.108275 |
| C | -4.526833 | 1.180701  | -0.152370 |
| C | -3.608298 | 2.128467  | 0.289286  |
| C | -4.010975 | 3.360334  | 0.786520  |
| C | -3.829325 | -0.089099 | -0.577905 |
| C | -2.363007 | 0.391194  | -0.706021 |
| C | -1.150415 | 2.281897  | 0.341456  |
| C | 0.093869  | 1.477757  | 0.017406  |
| C | -0.117571 | 0.017778  | 0.466097  |
| C | -1.227792 | -0.615691 | -0.401591 |
| C | -4.359219 | -0.691615 | -1.891234 |



|   |           |           |           |
|---|-----------|-----------|-----------|
| C | -5.286079 | -1.812756 | -1.420431 |
| C | -4.082899 | -1.233159 | 0.485834  |
| C | -2.817518 | -1.616475 | 1.238822  |
| C | -1.724052 | -1.936551 | 0.215392  |
| C | -0.054069 | -3.224850 | -2.034742 |
| C | -1.512349 | -3.464317 | -1.780683 |
| C | -2.247860 | -2.939588 | -0.803330 |
| C | -3.652928 | -3.424568 | -0.537388 |
| C | 1.371128  | 2.164501  | 0.538485  |
| C | 2.539206  | 1.184338  | 0.596433  |
| C | 2.276272  | -0.050177 | -0.261501 |
| C | 1.621093  | -1.604807 | 1.296787  |
| C | 3.421113  | -1.088763 | -0.171414 |
| C | 2.975578  | -1.871328 | 1.042013  |
| C | 0.987287  | -2.167614 | 2.396364  |
| C | 1.719472  | -3.029978 | 3.212910  |
| C | 3.047812  | -3.321723 | 2.948340  |
| C | 3.683190  | -2.730555 | 1.853140  |
| C | 3.923675  | 1.807155  | 0.371221  |
| C | 4.947173  | 0.767331  | 0.822881  |
| C | 4.827853  | -0.440883 | -0.078108 |
| C | 4.829801  | -1.357710 | -2.169933 |
| C | 3.554117  | -1.919776 | -1.472586 |
| C | 4.498725  | 1.037643  | -2.027307 |
| C | 4.230866  | 2.178632  | -1.061158 |
| C | 4.271078  | 3.430875  | -1.515081 |
| C | 3.945191  | 4.692538  | -0.776115 |
| H | -3.290344 | 4.084825  | 1.125464  |
| H | -2.511872 | -0.789588 | 1.883580  |
| H | -4.840528 | -0.868685 | 1.181464  |
| H | -6.256180 | -1.404449 | -1.126631 |
| H | -4.851376 | 0.055665  | -2.512391 |
| H | -3.608945 | -4.094528 | 0.327206  |
| H | -6.604148 | 0.731046  | -0.450069 |
| H | -7.360391 | 2.923887  | 0.411036  |
| H | -5.716182 | 4.578517  | 1.202646  |
| H | 0.168609  | 1.466858  | -1.077589 |
| H | -0.414970 | 0.021376  | 1.520569  |
| H | 0.438057  | -2.730997 | -1.197606 |
| H | 0.452575  | -4.173905 | -2.216108 |
| H | -2.242302 | 0.735720  | -1.737498 |
| H | -0.869272 | -2.399292 | 0.708932  |
| H | -4.014998 | -4.024112 | -1.371704 |
| H | -1.997096 | -4.173853 | -2.445923 |
| H | -3.530653 | -1.120635 | -2.458634 |
| H | -5.464276 | -2.577616 | -2.173676 |
| H | -3.021746 | -2.467774 | 1.888720  |
| H | -0.747099 | -0.837510 | -1.354152 |
| H | 0.102492  | -2.611288 | -2.926976 |
| H | 1.602147  | 2.981166  | -0.156270 |
| H | 0.498019  | 3.315017  | 1.813535  |

|   |           |           |           |
|---|-----------|-----------|-----------|
| H | 3.612591  | 4.518639  | 0.244429  |
| H | 4.811888  | 5.355830  | -0.746144 |
| H | 3.153132  | 5.236292  | -1.295061 |
| H | 4.560735  | 3.573583  | -2.553338 |
| H | 5.093683  | 1.412971  | -2.860662 |
| H | 3.540603  | 0.724756  | -2.463666 |
| H | 4.759548  | 0.480683  | 1.859035  |
| H | 5.961837  | 1.161606  | 0.757668  |
| H | 3.996525  | 2.689303  | 1.004626  |
| H | 2.542296  | 0.821535  | 1.630193  |
| H | 2.057075  | 0.213751  | -1.294702 |
| H | -0.044561 | -1.945668 | 2.633399  |
| H | 1.234965  | -3.473439 | 4.072613  |
| H | 3.595366  | -3.993753 | 3.593973  |
| H | 4.726534  | -2.942102 | 1.651459  |
| H | 3.676385  | -2.977873 | -1.245198 |
| H | 5.645577  | -2.074754 | -2.074225 |
| H | 2.661229  | -1.820954 | -2.090236 |
| H | 4.685803  | -1.156359 | -3.230042 |
| H | 5.517286  | -1.221272 | 0.258906  |

Equilibrium geometry of terrequinone A (22)

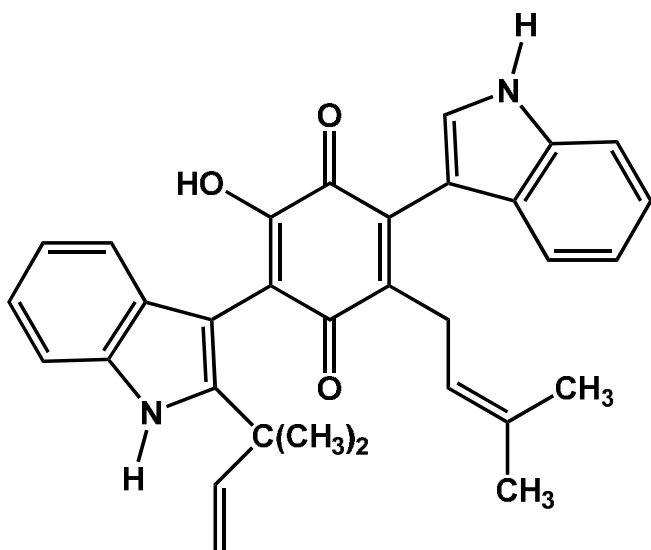

|   |           |           |           |
|---|-----------|-----------|-----------|
| O | -1.109757 | 0.842247  | -1.908403 |
| O | -1.679172 | -2.033836 | 1.747446  |
| O | 0.841069  | -2.659500 | 1.499915  |
| N | -4.856105 | 1.001519  | 0.279797  |
| N | 4.743419  | -2.486347 | -0.678133 |
| C | -2.847011 | 2.417670  | 0.752199  |
| C | -3.486392 | 1.102770  | 0.364293  |
| C | -2.938415 | -0.118597 | 0.052502  |
| C | -4.029026 | -1.014084 | -0.224397 |
| C | -1.523822 | -0.500073 | -0.029227 |
| C | -5.216920 | -0.273438 | -0.076796 |

|   |           |           |           |
|---|-----------|-----------|-----------|
| C | -2.841815 | 3.360743  | -0.455788 |
| C | -3.653816 | 3.067827  | 1.894578  |
| C | -1.459960 | 2.164472  | 1.297480  |
| C | -0.662144 | 0.070644  | -1.084003 |
| C | 0.796418  | -0.307860 | -1.160900 |
| C | 1.321022  | -1.203393 | -0.309952 |
| C | -0.988850 | -1.428294 | 0.779594  |
| C | -4.102455 | -2.362518 | -0.588493 |
| C | -6.474594 | -0.838712 | -0.278740 |
| C | 2.752104  | -1.549397 | -0.275116 |
| C | 0.447010  | -1.832424 | 0.700486  |
| C | 1.612418  | 0.412194  | -2.197019 |
| C | 3.737272  | -0.898413 | 0.541838  |
| C | -5.345836 | -2.928677 | -0.790175 |
| C | -6.520672 | -2.172690 | -0.635807 |
| C | 4.975089  | -1.511486 | 0.258457  |
| C | 3.409773  | -2.504631 | -0.994639 |
| C | -0.340709 | 2.748049  | 0.895844  |
| C | 2.099864  | 1.718402  | -1.625158 |
| C | 3.687680  | 0.169651  | 1.444649  |
| C | 6.162970  | -1.090339 | 0.856784  |
| C | 3.361174  | 2.083967  | -1.400495 |
| C | 4.860786  | 0.592719  | 2.033910  |
| C | 6.086970  | -0.034319 | 1.742160  |
| C | 3.667819  | 3.411466  | -0.766122 |
| C | 4.578969  | 1.271119  | -1.729670 |
| H | -5.502521 | 1.744359  | 0.484223  |
| H | -2.234051 | 2.953620  | -1.261866 |
| H | -2.449420 | 4.337128  | -0.169520 |
| H | -3.858744 | 3.500022  | -0.822681 |
| H | -4.656289 | 3.347459  | 1.569179  |
| H | -3.148299 | 3.977880  | 2.215379  |
| H | -3.738540 | 2.396073  | 2.748738  |
| H | -1.425967 | 1.466701  | 2.130159  |
| H | -3.198500 | -2.947208 | -0.706038 |
| H | -7.377229 | -0.254591 | -0.160993 |
| H | 2.438943  | -0.219238 | -2.506045 |
| H | 0.978781  | 0.605730  | -3.062028 |
| H | -5.422083 | -3.970411 | -1.070520 |
| H | -7.479732 | -2.644711 | -0.799905 |
| H | 3.026143  | -3.202957 | -1.719359 |
| H | 0.603323  | 2.538943  | 1.382195  |
| H | -0.321982 | 3.450536  | 0.072535  |
| H | 5.439348  | -3.092170 | -1.078299 |
| H | 1.309176  | 2.408300  | -1.346334 |
| H | -1.068460 | -2.641310 | 2.198707  |
| H | 2.746734  | 0.660703  | 1.659840  |
| H | 7.105875  | -1.567600 | 0.627146  |
| H | 4.844604  | 1.420394  | 2.729878  |
| H | 6.989081  | 0.321297  | 2.220972  |
| H | 4.199162  | 3.256367  | 0.176968  |

|   |          |          |           |
|---|----------|----------|-----------|
| H | 2.764145 | 3.985151 | -0.566544 |
| H | 4.325745 | 4.004298 | -1.405750 |
| H | 4.352483 | 0.274160 | -2.100443 |
| H | 5.178792 | 1.793464 | -2.479310 |
| H | 5.201761 | 1.166040 | -0.837259 |

Equilibrium geometry of viomycin (23)

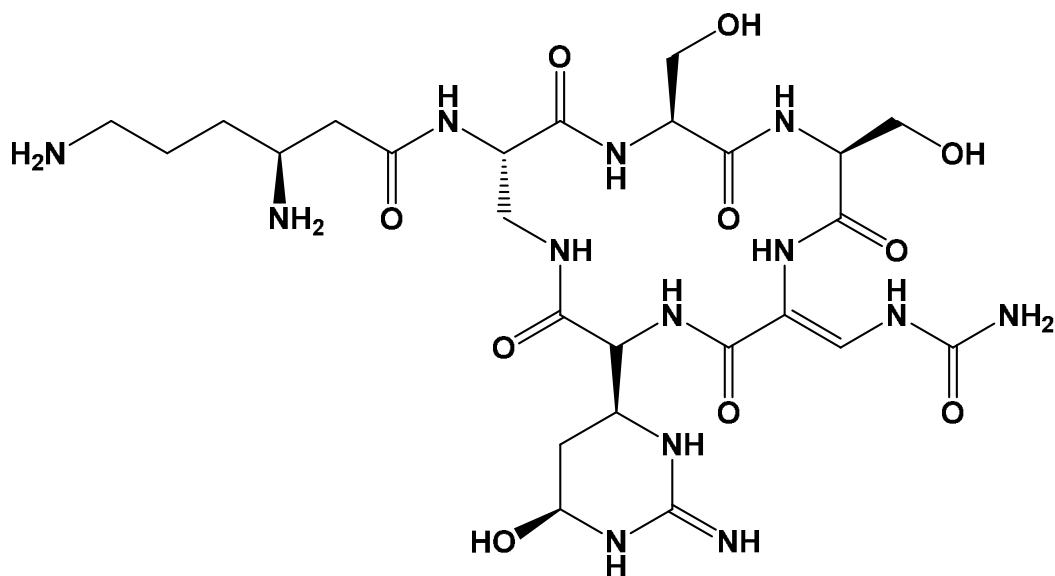

|   |           |           |           |
|---|-----------|-----------|-----------|
| O | 6.441226  | -3.610173 | 0.960422  |
| O | 2.531476  | -3.420217 | -0.033416 |
| O | -1.206663 | -1.198041 | -2.592761 |
| O | 2.619322  | -0.259604 | 1.613239  |
| O | -2.095408 | -2.561678 | 2.313012  |
| O | -5.270592 | 1.983455  | -2.829879 |
| O | -2.865375 | 2.681514  | -1.308139 |
| O | -0.212447 | 0.891800  | -0.464688 |
| O | 0.861491  | 4.626766  | -2.166782 |
| O | 2.547402  | 3.922850  | 4.240783  |
| N | 5.503255  | -0.380676 | -0.361011 |
| N | 2.797459  | 0.053045  | -0.617970 |
| N | 7.401281  | -1.769552 | -0.194214 |
| N | 0.979817  | -1.971947 | -0.803966 |
| N | -2.516316 | -2.851721 | 0.114892  |
| N | -2.967050 | -0.480421 | -1.366091 |
| N | 7.625750  | 0.532694  | -0.259465 |
| N | -6.486193 | -3.835167 | 1.581042  |
| N | -1.336432 | 1.772068  | -2.723610 |
| N | 1.409077  | 2.460447  | -0.393242 |
| N | -7.510256 | 1.431374  | 1.152819  |
| N | 1.705283  | 3.800649  | 2.124305  |
| N | 1.390854  | 5.685505  | 3.407879  |
| C | 4.677119  | -1.575126 | -0.256333 |
| C | 3.301864  | -1.279413 | -0.880073 |
| C | 5.344520  | -2.757806 | -0.953228 |

|   |           |           |           |
|---|-----------|-----------|-----------|
| C | 6.689321  | -3.016010 | -0.305545 |
| C | 2.239161  | -2.329963 | -0.505782 |
| C | -1.412233 | -2.034028 | -0.336379 |
| C | -0.154728 | -2.849757 | -0.612925 |
| C | 6.769822  | -0.557851 | -0.290779 |
| C | -5.305314 | -3.048711 | 1.223402  |
| C | -4.063969 | -3.807308 | 1.710607  |
| C | -5.391298 | -1.661897 | 1.849197  |
| C | -1.842607 | -1.203895 | -1.549895 |
| C | 2.511322  | 0.472042  | 0.636331  |
| C | -2.794579 | -3.037104 | 1.431781  |
| C | -3.394562 | 0.551992  | -2.296504 |
| C | -6.520152 | -0.810122 | 1.281793  |
| C | 2.024108  | 1.872958  | 0.741548  |
| C | -0.191562 | 2.516317  | -2.246596 |
| C | -2.515454 | 1.787096  | -2.063271 |
| C | -6.446811 | 0.629953  | 1.761805  |
| C | -4.859603 | 0.883772  | -2.048886 |
| C | 0.313268  | 1.882659  | -0.943075 |
| C | -0.426370 | 4.022786  | -2.124494 |
| C | 2.156695  | 2.529617  | 1.898437  |
| C | 1.921830  | 4.448160  | 3.334898  |
| H | 4.521047  | -1.826399 | 0.795372  |
| H | 3.410180  | -1.343200 | -1.966258 |
| H | 4.734737  | -3.653377 | -0.882387 |
| H | 5.501889  | -2.513753 | -2.006599 |
| H | 7.293659  | -3.695313 | -0.907966 |
| H | 2.901646  | 0.748643  | -1.337630 |
| H | 8.404998  | -1.787424 | -0.125002 |
| H | -1.190745 | -1.324182 | 0.463910  |
| H | 0.040356  | -3.484745 | 0.249309  |
| H | -0.309759 | -3.490730 | -1.484314 |
| H | 0.808840  | -1.046740 | -1.170149 |
| H | -5.222889 | -2.917216 | 0.135492  |
| H | -4.017044 | -4.782180 | 1.219934  |
| H | -4.130324 | -3.964533 | 2.785562  |
| H | -3.078634 | -3.330827 | -0.571034 |
| H | -5.501600 | -1.772874 | 2.931873  |
| H | -4.443245 | -1.139486 | 1.684686  |
| H | 7.283484  | -3.798919 | 1.385639  |
| H | -3.255777 | 0.181588  | -3.311585 |
| H | -7.492116 | -1.224646 | 1.564890  |
| H | -6.475524 | -0.819895 | 0.188297  |
| H | -3.352260 | -0.449895 | -0.432761 |
| H | 7.163439  | 1.386907  | -0.531455 |
| H | 8.509706  | 0.406706  | -0.730100 |
| H | 0.600309  | 2.392527  | -2.987863 |
| H | -6.438282 | -4.749389 | 1.144687  |
| H | -7.321571 | -3.393696 | 1.214741  |
| H | -6.472775 | 0.644293  | 2.857990  |
| H | -5.487360 | 1.059454  | 1.463133  |

|   |           |          |           |
|---|-----------|----------|-----------|
| H | -5.013953 | 1.083467 | -0.983893 |
| H | -5.471579 | 0.028495 | -2.329912 |
| H | -1.115298 | 0.888601 | -3.165903 |
| H | 1.777205  | 3.297828 | -0.830311 |
| H | -0.940924 | 4.266252 | -1.196644 |
| H | -1.040920 | 4.345867 | -2.966389 |
| H | 2.661158  | 2.063230 | 2.731489  |
| H | -7.450371 | 2.390614 | 1.472701  |
| H | -8.413379 | 1.088285 | 1.461298  |
| H | -4.857543 | 2.769880 | -2.455071 |
| H | 1.167589  | 4.260711 | 1.404836  |
| H | 0.780464  | 5.554058 | -1.926269 |
| H | 0.866760  | 6.104959 | 2.660523  |
| H | 1.508526  | 6.199439 | 4.263021  |

**Table S1.** Calculated  $^1\text{H}$  NMR shielding constants, together with scaled and experimental chemical shifts – the GIAO-DFT(PBE0) calculations with the first-level basis sets.

| Mol.     | pcS-1    |                         | pecS-1   |                         | pecS-1 mod |                         | $\delta_{exp}^{[b]}$ |
|----------|----------|-------------------------|----------|-------------------------|------------|-------------------------|----------------------|
|          | $\sigma$ | $\delta_{scaled}^{[a]}$ | $\sigma$ | $\delta_{scaled}^{[a]}$ | $\sigma$   | $\delta_{scaled}^{[a]}$ |                      |
| <b>1</b> | 28.71    | 2.88                    | 28.3     | 3.39                    | 28.4       | 3.36                    | 4.38                 |
|          | 30.19    | 1.52                    | 30.1     | 1.74                    | 30.1       | 1.75                    | 2.51                 |
|          | 30.60    | 1.15                    | 30.5     | 1.36                    | 30.6       | 1.34                    | 2.31                 |
|          | 29.09    | 2.53                    | 28.9     | 2.89                    | 28.9       | 2.88                    | 3.53                 |
|          | 28.92    | 2.69                    | 28.9     | 2.85                    | 29.0       | 2.84                    | 3.21                 |
|          | 27.69    | 3.82                    | 27.8     | 3.91                    | 27.8       | 3.96                    | 4.03                 |
|          | 29.15    | 2.48                    | 29.0     | 2.71                    | 29.1       | 2.72                    | 3.18                 |
|          | 28.63    | 2.96                    | 28.7     | 3.02                    | 28.8       | 3.01                    | 3.34                 |
|          | 28.66    | 2.93                    | 28.9     | 2.87                    | 28.9       | 2.88                    | 3.24                 |
|          | 28.98    | 2.64                    | 29.1     | 2.63                    | 29.1       | 2.66                    | 2.80                 |
|          | 28.67    | 2.92                    | 28.6     | 3.11                    | 28.7       | 3.09                    | 3.00                 |
|          | 28.31    | 3.25                    | 28.3     | 3.37                    | 28.4       | 3.37                    | 3.27                 |
|          | 25.71    | 5.64                    | 25.9     | 5.71                    | 25.9       | 5.69                    | 5.42                 |
|          | 23.79    | 7.42                    | 24.2     | 7.31                    | 24.2       | 7.30                    | 7.45                 |
|          | 24.38    | 6.87                    | 24.7     | 6.76                    | 24.8       | 6.76                    | 7.25                 |
|          | 29.33    | 2.31                    | 29.6     | 2.15                    | 29.7       | 2.17                    | 0.99                 |
|          | 29.71    | 1.96                    | 30.2     | 1.67                    | 30.2       | 1.69                    | 0.99                 |
|          | 29.75    | 1.93                    | 30.2     | 1.65                    | 30.2       | 1.67                    | 0.99                 |
|          | 24.26    | 6.98                    | 24.5     | 6.94                    | 24.6       | 6.93                    | 7.01                 |
|          | 24.29    | 6.96                    | 24.6     | 6.92                    | 24.6       | 6.90                    | 7.05                 |
|          | 23.37    | 7.80                    | 23.7     | 7.72                    | 23.7       | 7.71                    | 7.81                 |
|          | 22.81    | 8.32                    | 23.1     | 8.26                    | 23.2       | 8.22                    | 8.11                 |
|          | 23.60    | 7.59                    | 24.1     | 7.34                    | 24.1       | 7.37                    | 7.47                 |
|          | 23.81    | 7.39                    | 24.3     | 7.21                    | 24.3       | 7.20                    | 7.40                 |
|          | 24.06    | 7.17                    | 24.5     | 7.02                    | 24.5       | 7.02                    | 7.10                 |
| <b>2</b> | 24.33    | 6.92                    | 24.53    | 6.96                    | 24.57      | 6.94                    | 6.94                 |

|   |       |      |       |      |       |      |      |
|---|-------|------|-------|------|-------|------|------|
|   | 23.84 | 7.37 | 24.22 | 7.25 | 24.23 | 7.26 | 7.62 |
|   | 24.00 | 7.23 | 24.28 | 7.20 | 24.31 | 7.18 | 7.09 |
|   | 24.12 | 7.11 | 24.40 | 7.08 | 24.44 | 7.06 | 7.19 |
|   | 23.68 | 7.52 | 23.81 | 7.64 | 23.81 | 7.65 | 7.36 |
|   | 24.91 | 6.38 | 24.94 | 6.58 | 24.95 | 6.58 | 6.94 |
|   | 23.97 | 7.25 | 24.15 | 7.32 | 24.19 | 7.29 | 7.36 |
|   | 24.31 | 6.94 | 24.60 | 6.90 | 24.64 | 6.87 | 7.19 |
|   | 24.12 | 7.11 | 24.40 | 7.09 | 24.43 | 7.07 | 7.09 |
|   | 23.98 | 7.24 | 24.36 | 7.12 | 24.38 | 7.12 | 7.62 |
|   | 23.40 | 7.78 | 23.70 | 7.75 | 23.72 | 7.73 | 7.73 |
|   | 24.30 | 6.95 | 24.64 | 6.86 | 24.66 | 6.86 | 6.89 |
|   | 23.70 | 7.50 | 24.00 | 7.46 | 24.03 | 7.44 | 7.51 |
|   | 24.34 | 6.91 | 24.71 | 6.79 | 24.70 | 6.81 | 6.91 |
| 3 | 27.33 | 4.16 | 26.94 | 4.69 | 27.00 | 4.67 | 4.18 |
|   | 28.38 | 3.19 | 28.25 | 3.46 | 28.32 | 3.44 | 2.88 |
|   | 29.55 | 2.11 | 29.52 | 2.26 | 29.63 | 2.21 | 2.20 |
|   | 28.77 | 2.83 | 28.80 | 2.94 | 28.81 | 2.98 | 2.60 |
|   | 28.88 | 2.72 | 28.91 | 2.84 | 28.97 | 2.83 | 2.35 |
|   | 29.87 | 1.82 | 29.90 | 1.91 | 29.97 | 1.89 | 1.81 |
|   | 30.17 | 1.54 | 30.23 | 1.59 | 30.30 | 1.59 | 1.51 |
|   | 30.05 | 1.65 | 30.03 | 1.78 | 30.09 | 1.79 | 2.34 |
|   | 25.38 | 5.95 | 25.43 | 6.12 | 25.43 | 6.14 | 6.40 |
|   | 28.82 | 2.79 | 28.92 | 2.83 | 28.93 | 2.87 | 2.80 |
|   | 29.94 | 1.76 | 29.98 | 1.83 | 30.06 | 1.81 | 1.97 |
|   | 29.48 | 2.18 | 29.73 | 2.07 | 29.79 | 2.06 | 1.94 |
|   | 29.84 | 1.84 | 29.90 | 1.91 | 29.96 | 1.90 | 1.57 |
|   | 28.57 | 3.02 | 28.67 | 3.07 | 28.72 | 3.06 | 3.24 |
|   | 27.63 | 3.88 | 27.65 | 4.03 | 27.66 | 4.06 | 3.80 |
|   | 29.40 | 2.25 | 29.47 | 2.31 | 29.51 | 2.32 | 2.44 |
|   | 29.16 | 2.47 | 29.34 | 2.43 | 29.40 | 2.43 | 2.54 |
|   | 29.24 | 2.40 | 29.20 | 2.57 | 29.22 | 2.60 | 2.07 |
|   | 29.24 | 2.40 | 29.39 | 2.39 | 29.45 | 2.38 | 2.31 |
|   | 29.33 | 2.31 | 29.43 | 2.35 | 29.45 | 2.38 | 1.70 |
|   | 30.22 | 1.49 | 30.27 | 1.56 | 30.36 | 1.53 | 1.61 |
|   | 30.24 | 1.47 | 30.46 | 1.38 | 30.51 | 1.39 | 1.47 |
|   | 30.31 | 1.41 | 30.46 | 1.38 | 30.51 | 1.39 | 1.47 |
|   | 30.54 | 1.20 | 30.46 | 1.38 | 30.53 | 1.37 | 1.38 |
|   | 30.13 | 1.58 | 30.29 | 1.54 | 30.36 | 1.53 | 1.38 |
|   | 25.75 | 5.61 | 25.91 | 5.66 | 25.97 | 5.64 | 5.58 |
|   | 29.22 | 2.41 | 29.46 | 2.32 | 29.50 | 2.33 | 2.56 |
|   | 29.33 | 2.32 | 29.45 | 2.33 | 29.51 | 2.33 | 2.58 |
|   | 29.90 | 1.79 | 30.06 | 1.75 | 30.14 | 1.74 | 1.86 |
|   | 28.56 | 3.03 | 28.55 | 3.17 | 28.59 | 3.18 | 2.43 |
|   | 26.02 | 5.37 | 26.17 | 5.42 | 26.24 | 5.38 | 5.47 |
|   | 22.77 | 8.36 | 23.12 | 8.29 | 23.16 | 8.25 | 8.33 |
|   | 23.27 | 7.89 | 23.58 | 7.85 | 23.61 | 7.84 | 8.02 |
|   | 23.98 | 7.24 | 24.00 | 7.46 | 24.03 | 7.45 | 6.24 |
|   | 22.84 | 8.29 | 23.28 | 8.14 | 23.30 | 8.13 | 8.23 |
|   | 23.66 | 7.54 | 24.02 | 7.44 | 24.04 | 7.44 | 7.64 |
|   | 25.40 | 5.93 | 25.61 | 5.95 | 25.64 | 5.94 | 5.75 |

|   |       |      |       |      |       |      |      |
|---|-------|------|-------|------|-------|------|------|
|   | 23.84 | 7.37 | 24.19 | 7.28 | 24.21 | 7.27 | 7.25 |
|   | 23.58 | 7.61 | 23.89 | 7.57 | 23.92 | 7.55 | 7.56 |
| 4 | 27.62 | 3.89 | 27.55 | 4.12 | 27.62 | 4.09 | 4.11 |
|   | 27.16 | 4.32 | 26.74 | 4.88 | 26.84 | 4.81 | 4.26 |
|   | 28.61 | 2.97 | 28.39 | 3.33 | 28.48 | 3.29 | 2.76 |
|   | 28.56 | 3.02 | 28.23 | 3.48 | 28.31 | 3.45 | 2.95 |
|   | 24.02 | 7.20 | 24.12 | 7.34 | 24.15 | 7.34 | 7.56 |
|   | 24.18 | 7.05 | 24.48 | 7.01 | 24.50 | 7.00 | 6.91 |
|   | 23.77 | 7.44 | 24.06 | 7.40 | 24.10 | 7.38 | 7.19 |
|   | 24.12 | 7.12 | 24.53 | 6.96 | 24.54 | 6.97 | 6.96 |
|   | 28.54 | 3.04 | 28.39 | 3.33 | 28.48 | 3.29 | 2.79 |
|   | 28.71 | 2.88 | 28.59 | 3.14 | 28.67 | 3.11 | 2.51 |
|   | 30.68 | 1.07 | 30.53 | 1.32 | 30.65 | 1.26 | 0.72 |
|   | 27.21 | 4.26 | 27.49 | 4.18 | 27.53 | 4.17 | 3.83 |
|   | 27.37 | 4.12 | 27.58 | 4.09 | 27.60 | 4.11 | 4.05 |
|   | 29.97 | 1.72 | 29.79 | 2.01 | 29.90 | 1.96 | 1.56 |
|   | 29.77 | 1.91 | 29.77 | 2.03 | 29.82 | 2.03 | 1.62 |
|   | 27.33 | 4.15 | 27.10 | 4.54 | 27.13 | 4.55 | 4.49 |
|   | 27.35 | 4.14 | 27.84 | 3.85 | 27.85 | 3.88 | 3.78 |
|   | 27.36 | 4.12 | 27.80 | 3.88 | 27.81 | 3.91 | 3.78 |
|   | 27.40 | 4.09 | 27.81 | 3.88 | 27.82 | 3.90 | 3.78 |
|   | 29.16 | 2.47 | 29.12 | 2.64 | 29.17 | 2.64 | 2.37 |
|   | 28.59 | 3.00 | 28.76 | 2.98 | 28.78 | 3.01 | 2.88 |
|   | 29.20 | 2.43 | 29.26 | 2.51 | 29.30 | 2.52 | 2.31 |
|   | 28.35 | 3.22 | 28.54 | 3.19 | 28.58 | 3.20 | 3.09 |
|   | 30.27 | 1.45 | 30.31 | 1.52 | 30.38 | 1.51 | 1.20 |
|   | 28.44 | 3.13 | 28.57 | 3.16 | 28.62 | 3.16 | 2.74 |
|   | 24.41 | 6.84 | 24.64 | 6.86 | 24.63 | 6.88 | 6.65 |
|   | 25.13 | 6.18 | 25.44 | 6.11 | 25.44 | 6.13 | 5.85 |
|   | 24.91 | 6.38 | 25.27 | 6.26 | 25.26 | 6.29 | 6.22 |
|   | 29.45 | 2.21 | 29.67 | 2.12 | 29.73 | 2.12 | 1.95 |
|   | 29.48 | 2.18 | 29.69 | 2.10 | 29.72 | 2.13 | 1.99 |
|   | 27.90 | 3.63 | 27.97 | 3.73 | 28.04 | 3.70 | 3.54 |
|   | 29.42 | 2.23 | 29.09 | 2.67 | 29.14 | 2.67 | 2.28 |
|   | 30.63 | 1.12 | 30.60 | 1.25 | 30.69 | 1.22 | 1.07 |
|   | 29.54 | 2.12 | 29.49 | 2.29 | 29.54 | 2.30 | 1.90 |
|   | 27.01 | 4.45 | 27.37 | 4.29 | 27.37 | 4.32 | 4.01 |
|   | 27.15 | 4.32 | 27.58 | 4.09 | 27.59 | 4.12 | 4.23 |
|   | 28.61 | 2.98 | 28.74 | 3.00 | 28.77 | 3.02 | 2.07 |
|   | 29.56 | 2.10 | 29.61 | 2.18 | 29.70 | 2.15 | 2.59 |
|   | 28.95 | 2.66 | 28.50 | 3.23 | 28.59 | 3.19 | 2.80 |
|   | 30.21 | 1.50 | 30.16 | 1.66 | 30.23 | 1.65 | 1.49 |
|   | 29.20 | 2.43 | 29.06 | 2.70 | 29.21 | 2.61 | 2.15 |
|   | 27.67 | 3.85 | 27.61 | 4.06 | 27.68 | 4.03 | 3.71 |
|   | 27.63 | 3.87 | 27.58 | 4.09 | 27.68 | 4.04 | 3.83 |
|   | 27.57 | 3.94 | 27.65 | 4.02 | 27.70 | 4.02 | 3.82 |
|   | 27.42 | 4.07 | 27.44 | 4.22 | 27.50 | 4.20 | 3.92 |
|   | 23.64 | 7.55 | 23.69 | 7.75 | 23.76 | 7.70 | 7.68 |
|   | 23.74 | 7.46 | 23.92 | 7.53 | 23.96 | 7.51 | 7.26 |
|   | 23.95 | 7.27 | 24.19 | 7.28 | 24.23 | 7.26 | 7.11 |



|   |       |      |       |      |       |      |      |
|---|-------|------|-------|------|-------|------|------|
|   | 23.70 | 7.50 | 23.95 | 7.51 | 23.99 | 7.48 | 7.33 |
|   | 24.17 | 7.06 | 24.55 | 6.94 | 24.54 | 6.96 | 7.02 |
|   | 28.05 | 3.50 | 27.97 | 3.73 | 28.06 | 3.68 | 3.46 |
|   | 28.74 | 2.86 | 28.66 | 3.07 | 28.72 | 3.06 | 2.36 |
|   | 29.05 | 2.57 | 29.01 | 2.75 | 29.07 | 2.73 | 2.66 |
|   | 27.49 | 4.01 | 27.84 | 3.84 | 27.86 | 3.87 | 3.75 |
|   | 27.43 | 4.06 | 27.72 | 3.96 | 27.76 | 3.96 | 3.75 |
|   | 29.99 | 1.71 | 29.99 | 1.83 | 30.05 | 1.82 | 1.43 |
|   | 29.84 | 1.84 | 29.86 | 1.94 | 29.93 | 1.93 | 1.60 |
|   | 27.21 | 4.26 | 26.88 | 4.75 | 26.91 | 4.75 | 4.29 |
|   | 27.64 | 3.87 | 28.06 | 3.64 | 28.08 | 3.66 | 3.69 |
|   | 27.47 | 4.03 | 27.89 | 3.80 | 27.90 | 3.83 | 3.69 |
|   | 27.50 | 4.00 | 27.98 | 3.72 | 27.98 | 3.75 | 3.69 |
|   | 29.12 | 2.50 | 29.13 | 2.63 | 29.17 | 2.64 | 2.37 |
|   | 28.57 | 3.02 | 28.77 | 2.98 | 28.77 | 3.01 | 2.88 |
|   | 29.18 | 2.45 | 29.27 | 2.50 | 29.30 | 2.52 | 2.31 |
|   | 28.34 | 3.23 | 28.56 | 3.17 | 28.58 | 3.19 | 3.09 |
|   | 30.29 | 1.43 | 30.36 | 1.48 | 30.41 | 1.48 | 1.21 |
|   | 28.47 | 3.10 | 28.64 | 3.09 | 28.68 | 3.10 | 2.75 |
|   | 24.10 | 7.13 | 24.33 | 7.14 | 24.31 | 7.18 | 6.83 |
|   | 24.74 | 6.54 | 25.00 | 6.52 | 25.00 | 6.54 | 6.35 |
|   | 24.66 | 6.61 | 25.00 | 6.52 | 25.05 | 6.49 | 6.41 |
|   | 29.42 | 2.23 | 29.67 | 2.12 | 29.72 | 2.13 | 1.95 |
|   | 29.42 | 2.23 | 29.65 | 2.14 | 29.67 | 2.18 | 1.99 |
|   | 27.88 | 3.65 | 27.94 | 3.75 | 28.00 | 3.73 | 3.51 |
|   | 29.57 | 2.09 | 29.35 | 2.43 | 29.37 | 2.45 | 1.99 |
|   | 30.51 | 1.22 | 30.55 | 1.29 | 30.62 | 1.29 | 0.97 |
|   | 29.50 | 2.15 | 29.56 | 2.23 | 29.58 | 2.26 | 2.00 |
|   | 27.21 | 4.26 | 27.60 | 4.08 | 27.61 | 4.10 | 3.94 |
|   | 27.09 | 4.38 | 27.42 | 4.24 | 27.42 | 4.28 | 4.16 |
|   | 29.58 | 2.09 | 29.69 | 2.11 | 29.75 | 2.10 | 1.74 |
|   | 28.69 | 2.91 | 28.93 | 2.82 | 28.94 | 2.85 | 2.56 |
|   | 28.89 | 2.72 | 28.45 | 3.28 | 28.52 | 3.25 | 2.79 |
|   | 29.75 | 1.93 | 29.86 | 1.94 | 29.92 | 1.95 | 1.67 |
|   | 29.18 | 2.46 | 29.24 | 2.52 | 29.33 | 2.49 | 2.20 |
|   | 26.74 | 4.70 | 26.79 | 4.84 | 26.80 | 4.86 | 4.73 |
|   | 28.26 | 3.30 | 28.25 | 3.46 | 28.30 | 3.46 | 3.20 |
| 5 | 29.35 | 2.30 | 29.27 | 2.50 | 29.37 | 2.46 | 2.48 |
|   | 29.52 | 2.14 | 29.60 | 2.19 | 29.68 | 2.16 | 2.23 |
|   | 28.16 | 3.39 | 28.07 | 3.63 | 28.16 | 3.58 | 3.41 |
|   | 28.84 | 2.77 | 28.87 | 2.88 | 28.96 | 2.84 | 2.75 |
|   | 30.09 | 1.61 | 30.15 | 1.67 | 30.19 | 1.69 | 1.67 |
|   | 29.96 | 1.74 | 30.19 | 1.64 | 30.28 | 1.61 | 1.55 |
|   | 27.52 | 3.98 | 27.46 | 4.20 | 27.52 | 4.19 | 4.23 |
|   | 29.20 | 2.43 | 29.05 | 2.71 | 29.14 | 2.67 | 2.57 |
|   | 30.00 | 1.69 | 29.71 | 2.08 | 29.79 | 2.06 | 1.95 |
|   | 29.96 | 1.73 | 30.11 | 1.71 | 30.17 | 1.71 | 1.76 |
|   | 30.20 | 1.51 | 30.33 | 1.51 | 30.42 | 1.48 | 1.56 |
|   | 30.50 | 1.24 | 30.74 | 1.12 | 30.81 | 1.11 | 1.15 |
|   | 30.25 | 1.47 | 30.59 | 1.26 | 30.66 | 1.25 | 1.15 |

|   |       |      |       |      |       |      |      |
|---|-------|------|-------|------|-------|------|------|
|   | 30.30 | 1.42 | 30.66 | 1.19 | 30.74 | 1.17 | 1.15 |
|   | 29.96 | 1.73 | 30.04 | 1.78 | 30.11 | 1.76 | 1.84 |
|   | 30.18 | 1.53 | 30.29 | 1.54 | 30.37 | 1.52 | 1.64 |
|   | 30.43 | 1.30 | 30.78 | 1.08 | 30.83 | 1.09 | 1.25 |
|   | 30.45 | 1.28 | 30.70 | 1.16 | 30.75 | 1.17 | 1.25 |
|   | 30.11 | 1.60 | 30.49 | 1.35 | 30.52 | 1.38 | 1.25 |
|   | 29.57 | 2.09 | 29.47 | 2.32 | 29.52 | 2.32 | 2.29 |
|   | 26.90 | 4.55 | 26.84 | 4.79 | 26.93 | 4.73 | 4.74 |
|   | 29.72 | 1.95 | 29.90 | 1.90 | 29.99 | 1.87 | 1.89 |
|   | 29.18 | 2.45 | 29.40 | 2.38 | 29.46 | 2.37 | 1.89 |
|   | 29.70 | 1.97 | 29.99 | 1.83 | 30.06 | 1.81 | 1.89 |
|   | 30.02 | 1.68 | 30.18 | 1.64 | 30.24 | 1.65 | 1.63 |
|   | 30.02 | 1.68 | 30.18 | 1.64 | 30.26 | 1.62 | 1.78 |
|   | 29.94 | 1.75 | 29.70 | 2.10 | 29.79 | 2.07 | 1.98 |
|   | 29.99 | 1.71 | 30.07 | 1.74 | 30.16 | 1.71 | 1.64 |
|   | 29.92 | 1.77 | 30.08 | 1.74 | 30.15 | 1.73 | 1.84 |
|   | 30.02 | 1.68 | 30.49 | 1.36 | 30.52 | 1.38 | 1.22 |
|   | 30.33 | 1.40 | 30.61 | 1.24 | 30.67 | 1.25 | 1.22 |
|   | 30.51 | 1.22 | 30.89 | 0.97 | 30.93 | 0.99 | 1.22 |
|   | 30.86 | 0.91 | 31.13 | 0.75 | 31.20 | 0.75 | 1.16 |
|   | 30.03 | 1.67 | 30.34 | 1.50 | 30.40 | 1.49 | 1.16 |
|   | 30.31 | 1.41 | 30.69 | 1.17 | 30.75 | 1.17 | 1.16 |
|   | 29.51 | 2.14 | 29.48 | 2.31 | 29.54 | 2.30 | 2.31 |
|   | 30.87 | 0.90 | 31.18 | 0.70 | 31.25 | 0.70 | 1.18 |
|   | 30.01 | 1.69 | 30.37 | 1.47 | 30.44 | 1.46 | 1.18 |
|   | 30.28 | 1.44 | 30.69 | 1.16 | 30.75 | 1.17 | 1.18 |
| 6 | 23.35 | 7.82 | 23.72 | 7.73 | 23.73 | 7.72 | 7.82 |
|   | 23.63 | 7.57 | 24.00 | 7.46 | 24.03 | 7.44 | 7.55 |
|   | 22.92 | 8.21 | 23.29 | 8.13 | 23.30 | 8.13 | 8.27 |
|   | 23.51 | 7.67 | 24.01 | 7.45 | 24.01 | 7.47 | 7.67 |
|   | 26.56 | 4.86 | 26.52 | 5.09 | 26.54 | 5.10 | 4.56 |
|   | 25.05 | 6.26 | 25.19 | 6.34 | 25.20 | 6.35 | 7.58 |
|   | 24.19 | 7.04 | 24.44 | 7.04 | 24.46 | 7.04 | 7.69 |
|   | 23.89 | 7.32 | 24.16 | 7.31 | 24.20 | 7.29 | 7.66 |
|   | 23.80 | 7.41 | 23.92 | 7.53 | 23.93 | 7.53 | 7.96 |
|   | 28.32 | 3.25 | 28.41 | 3.31 | 28.43 | 3.34 | 2.58 |
|   | 28.32 | 3.24 | 28.44 | 3.28 | 28.54 | 3.23 | 2.71 |
|   | 26.74 | 4.70 | 26.68 | 4.94 | 26.72 | 4.93 | 5.49 |
|   | 24.60 | 6.67 | 24.88 | 6.63 | 24.86 | 6.67 | 7.23 |
|   | 24.67 | 6.60 | 24.98 | 6.54 | 24.99 | 6.54 | 7.09 |
|   | 24.20 | 7.04 | 24.44 | 7.05 | 24.47 | 7.04 | 7.27 |
|   | 24.42 | 6.84 | 24.67 | 6.83 | 24.69 | 6.83 | 7.48 |
|   | 28.13 | 3.42 | 28.10 | 3.60 | 28.19 | 3.56 | 4.25 |
|   | 29.62 | 2.05 | 29.58 | 2.20 | 29.63 | 2.21 | 1.73 |
|   | 30.10 | 1.60 | 30.17 | 1.66 | 30.26 | 1.63 | 1.51 |
|   | 30.52 | 1.22 | 30.22 | 1.61 | 30.25 | 1.63 | 1.84 |
|   | 30.27 | 1.45 | 30.57 | 1.28 | 30.61 | 1.30 | 0.95 |
|   | 30.27 | 1.45 | 30.59 | 1.26 | 30.65 | 1.26 | 0.95 |
|   | 30.62 | 1.13 | 30.88 | 0.99 | 30.96 | 0.97 | 0.95 |
|   | 30.01 | 1.69 | 30.33 | 1.50 | 30.36 | 1.53 | 0.90 |

|   |       |      |       |      |       |      |      |
|---|-------|------|-------|------|-------|------|------|
|   | 30.92 | 0.85 | 31.11 | 0.77 | 31.21 | 0.74 | 0.90 |
|   | 30.23 | 1.48 | 30.52 | 1.32 | 30.56 | 1.34 | 0.90 |
| 7 | 25.48 | 5.86 | 25.42 | 6.12 | 25.46 | 6.11 | 6.17 |
|   | 27.47 | 4.02 | 27.39 | 4.27 | 27.46 | 4.24 | 4.49 |
|   | 27.96 | 3.58 | 28.04 | 3.66 | 28.10 | 3.64 | 3.09 |
|   | 23.78 | 7.42 | 23.86 | 7.59 | 23.86 | 7.60 | 7.34 |
|   | 23.74 | 7.46 | 24.00 | 7.46 | 24.00 | 7.47 | 7.22 |
|   | 27.17 | 4.30 | 27.47 | 4.20 | 27.51 | 4.19 | 4.72 |
|   | 26.82 | 4.62 | 27.06 | 4.58 | 27.11 | 4.57 | 4.72 |
|   | 24.44 | 6.82 | 24.86 | 6.65 | 24.87 | 6.66 | 6.75 |
|   | 28.99 | 2.63 | 29.37 | 2.41 | 29.42 | 2.41 | 2.93 |
|   | 27.63 | 3.88 | 27.96 | 3.73 | 27.95 | 3.79 | 2.93 |
|   | 29.42 | 2.23 | 29.74 | 2.06 | 29.77 | 2.08 | 2.93 |
|   | 27.79 | 3.73 | 27.78 | 3.90 | 27.82 | 3.91 | 2.62 |
|   | 28.18 | 3.37 | 28.11 | 3.59 | 28.15 | 3.60 | 2.62 |
|   | 24.47 | 6.79 | 24.81 | 6.70 | 24.84 | 6.69 | 6.90 |
|   | 23.53 | 7.66 | 23.74 | 7.71 | 23.73 | 7.72 | 7.29 |
|   | 24.00 | 7.22 | 24.31 | 7.16 | 24.35 | 7.14 | 7.23 |
|   | 22.93 | 8.21 | 23.36 | 8.06 | 23.36 | 8.07 | 7.64 |
|   | 23.91 | 7.30 | 24.25 | 7.22 | 24.29 | 7.20 | 7.19 |
|   | 24.01 | 7.22 | 24.38 | 7.10 | 24.40 | 7.10 | 7.19 |
|   | 28.90 | 2.71 | 29.23 | 2.54 | 29.27 | 2.55 | 3.14 |
|   | 27.49 | 4.01 | 27.81 | 3.87 | 27.78 | 3.94 | 3.14 |
|   | 28.99 | 2.63 | 29.33 | 2.44 | 29.35 | 2.47 | 3.14 |
|   | 27.53 | 3.97 | 27.90 | 3.79 | 27.95 | 3.78 | 4.72 |
|   | 27.04 | 4.42 | 27.32 | 4.33 | 27.37 | 4.32 | 4.72 |
|   | 29.24 | 2.39 | 29.67 | 2.13 | 29.71 | 2.14 | 3.14 |
|   | 27.85 | 3.67 | 28.19 | 3.52 | 28.18 | 3.57 | 3.14 |
|   | 29.41 | 2.24 | 29.78 | 2.02 | 29.82 | 2.03 | 3.14 |
| 8 | 30.32 | 1.40 | 30.56 | 1.29 | 30.57 | 1.33 | 0.82 |
|   | 30.74 | 1.01 | 30.85 | 1.01 | 30.89 | 1.04 | 0.82 |
|   | 31.18 | 0.61 | 31.40 | 0.50 | 31.45 | 0.51 | 0.82 |
|   | 30.55 | 1.19 | 30.86 | 1.01 | 30.95 | 0.98 | 1.13 |
|   | 30.66 | 1.09 | 30.99 | 0.88 | 31.05 | 0.89 | 1.13 |
|   | 30.52 | 1.22 | 30.83 | 1.04 | 30.89 | 1.03 | 1.13 |
|   | 25.77 | 5.59 | 26.07 | 5.51 | 26.10 | 5.51 | 5.42 |
|   | 30.01 | 1.68 | 30.22 | 1.61 | 30.28 | 1.61 | 1.05 |
|   | 30.71 | 1.04 | 30.96 | 0.91 | 31.02 | 0.92 | 1.05 |
|   | 30.81 | 0.95 | 30.98 | 0.89 | 31.05 | 0.89 | 1.05 |
|   | 30.65 | 1.10 | 30.98 | 0.90 | 31.05 | 0.88 | 0.68 |
|   | 30.61 | 1.13 | 30.94 | 0.93 | 31.00 | 0.94 | 0.68 |
|   | 31.08 | 0.70 | 31.35 | 0.55 | 31.41 | 0.55 | 0.68 |
| 9 | 30.67 | 1.08 | 30.43 | 1.41 | 30.60 | 1.31 | 1.44 |
|   | 30.28 | 1.44 | 30.04 | 1.78 | 30.18 | 1.70 | 1.69 |
|   | 30.04 | 1.66 | 30.27 | 1.56 | 30.34 | 1.55 | 1.69 |
|   | 29.97 | 1.72 | 30.09 | 1.73 | 30.16 | 1.72 | 1.59 |
|   | 30.25 | 1.47 | 30.25 | 1.58 | 30.34 | 1.55 | 1.52 |
|   | 30.75 | 1.01 | 30.73 | 1.12 | 30.85 | 1.07 | 1.52 |
|   | 28.05 | 3.50 | 28.07 | 3.63 | 28.16 | 3.59 | 3.64 |
|   | 30.19 | 1.52 | 30.37 | 1.47 | 30.44 | 1.46 | 2.21 |

|    |       |      |       |      |       |      |      |
|----|-------|------|-------|------|-------|------|------|
|    | 29.24 | 2.39 | 29.45 | 2.33 | 29.47 | 2.36 | 1.52 |
|    | 29.83 | 1.85 | 29.70 | 2.09 | 29.77 | 2.08 | 1.77 |
|    | 29.96 | 1.73 | 30.07 | 1.75 | 30.12 | 1.75 | 1.52 |
|    | 30.23 | 1.48 | 30.36 | 1.47 | 30.46 | 1.44 | 1.52 |
|    | 30.44 | 1.29 | 30.48 | 1.36 | 30.58 | 1.33 | 1.98 |
|    | 29.00 | 2.61 | 29.12 | 2.64 | 29.23 | 2.59 | 1.28 |
|    | 29.93 | 1.76 | 30.04 | 1.78 | 30.13 | 1.74 | 1.31 |
|    | 29.68 | 1.99 | 29.76 | 2.04 | 29.77 | 2.08 | 1.77 |
|    | 30.48 | 1.26 | 30.57 | 1.28 | 30.69 | 1.23 | 1.48 |
|    | 30.44 | 1.29 | 30.53 | 1.31 | 30.57 | 1.34 | 1.49 |
|    | 30.20 | 1.51 | 30.27 | 1.56 | 30.37 | 1.52 | 1.81 |
|    | 29.76 | 1.92 | 29.88 | 1.92 | 30.00 | 1.87 | 1.28 |
|    | 28.52 | 3.06 | 28.61 | 3.12 | 28.69 | 3.09 | 3.10 |
|    | 29.92 | 1.77 | 30.16 | 1.67 | 30.25 | 1.63 | 1.74 |
|    | 27.34 | 4.15 | 27.52 | 4.15 | 27.59 | 4.12 | 4.43 |
|    | 27.73 | 3.79 | 27.64 | 4.04 | 27.73 | 3.99 | 4.26 |
|    | 30.51 | 1.23 | 30.76 | 1.10 | 30.82 | 1.10 | 1.21 |
|    | 30.08 | 1.62 | 30.56 | 1.29 | 30.60 | 1.31 | 1.21 |
|    | 30.49 | 1.24 | 30.94 | 0.93 | 31.00 | 0.93 | 1.21 |
|    | 30.79 | 0.97 | 31.03 | 0.84 | 31.10 | 0.84 | 0.88 |
|    | 30.79 | 0.97 | 30.97 | 0.90 | 31.05 | 0.89 | 0.88 |
|    | 30.69 | 1.06 | 30.91 | 0.96 | 30.97 | 0.96 | 0.88 |
|    | 30.75 | 1.01 | 30.98 | 0.89 | 31.05 | 0.89 | 0.95 |
|    | 30.41 | 1.32 | 30.58 | 1.27 | 30.69 | 1.23 | 0.95 |
|    | 30.69 | 1.06 | 30.83 | 1.04 | 30.92 | 1.01 | 0.95 |
|    | 30.43 | 1.30 | 30.60 | 1.25 | 30.66 | 1.25 | 1.13 |
|    | 31.06 | 0.72 | 31.17 | 0.71 | 31.27 | 0.68 | 1.13 |
|    | 30.22 | 1.50 | 30.39 | 1.45 | 30.42 | 1.48 | 1.13 |
|    | 30.89 | 0.88 | 31.19 | 0.70 | 31.26 | 0.69 | 1.22 |
|    | 30.70 | 1.05 | 30.94 | 0.93 | 31.01 | 0.92 | 1.22 |
|    | 29.47 | 2.18 | 29.70 | 2.10 | 29.75 | 2.10 | 1.22 |
|    | 29.63 | 2.03 | 29.98 | 1.84 | 30.03 | 1.84 | 0.99 |
|    | 30.94 | 0.83 | 31.18 | 0.70 | 31.26 | 0.69 | 0.99 |
|    | 30.77 | 0.99 | 31.06 | 0.82 | 31.14 | 0.80 | 0.99 |
|    | 30.46 | 1.27 | 30.76 | 1.10 | 30.82 | 1.10 | 0.96 |
|    | 31.01 | 0.77 | 31.27 | 0.62 | 31.35 | 0.61 | 0.96 |
|    | 30.29 | 1.43 | 30.66 | 1.19 | 30.71 | 1.20 | 0.96 |
| 10 | 26.09 | 5.29 | 25.90 | 5.67 | 25.91 | 5.69 | 5.63 |
|    | 28.19 | 3.36 | 28.27 | 3.44 | 28.29 | 3.47 | 3.43 |
|    | 28.49 | 3.09 | 28.66 | 3.08 | 28.68 | 3.10 | 3.17 |
|    | 29.33 | 2.31 | 29.18 | 2.59 | 29.22 | 2.60 | 2.23 |
|    | 30.14 | 1.57 | 30.25 | 1.58 | 30.35 | 1.54 | 1.32 |
|    | 30.32 | 1.40 | 30.29 | 1.54 | 30.34 | 1.55 | 1.10 |
|    | 26.48 | 4.94 | 26.19 | 5.40 | 26.19 | 5.43 | 5.25 |
|    | 26.70 | 4.73 | 26.69 | 4.93 | 26.72 | 4.93 | 4.64 |
|    | 29.30 | 2.34 | 29.25 | 2.52 | 29.29 | 2.53 | 2.51 |
|    | 29.48 | 2.18 | 29.44 | 2.34 | 29.53 | 2.31 | 1.90 |
|    | 29.03 | 2.59 | 29.15 | 2.61 | 29.20 | 2.62 | 2.37 |
|    | 27.68 | 3.83 | 27.47 | 4.19 | 27.49 | 4.21 | 4.77 |
|    | 26.32 | 5.09 | 26.42 | 5.19 | 26.48 | 5.15 | 4.79 |

|    |       |       |       |       |       |       |      |
|----|-------|-------|-------|-------|-------|-------|------|
|    | 28.96 | 2.65  | 29.11 | 2.66  | 29.17 | 2.64  | 2.67 |
|    | 29.32 | 2.32  | 29.45 | 2.33  | 29.49 | 2.34  | 2.61 |
|    | 30.64 | 1.11  | 31.00 | 0.87  | 31.06 | 0.88  | 0.83 |
|    | 30.52 | 1.22  | 30.90 | 0.97  | 30.95 | 0.98  | 0.83 |
|    | 30.60 | 1.14  | 31.00 | 0.87  | 31.05 | 0.89  | 0.83 |
|    | 28.95 | 2.67  | 29.16 | 2.60  | 29.16 | 2.65  | 2.97 |
|    | 29.68 | 1.99  | 29.86 | 1.94  | 29.90 | 1.96  | 2.97 |
|    | 29.16 | 2.47  | 29.40 | 2.38  | 29.43 | 2.40  | 2.97 |
|    | 30.63 | 1.12  | 30.93 | 0.94  | 30.99 | 0.94  | 1.06 |
|    | 30.14 | 1.56  | 30.54 | 1.31  | 30.60 | 1.31  | 1.06 |
|    | 30.59 | 1.15  | 30.97 | 0.90  | 31.04 | 0.89  | 1.06 |
|    | 30.72 | 1.03  | 31.04 | 0.83  | 31.10 | 0.84  | 1.15 |
|    | 30.24 | 1.47  | 30.47 | 1.37  | 30.53 | 1.37  | 1.15 |
|    | 31.15 | 0.64  | 31.40 | 0.50  | 31.48 | 0.48  | 1.15 |
|    | 31.11 | 0.67  | 31.47 | 0.43  | 31.55 | 0.42  | 1.04 |
|    | 31.63 | 0.19  | 31.97 | -0.04 | 32.04 | -0.04 | 1.04 |
|    | 32.88 | -0.95 | 33.05 | -1.05 | 33.10 | -1.02 | 1.04 |
|    | 29.97 | 1.73  | 30.13 | 1.69  | 30.19 | 1.69  | 1.59 |
|    | 30.05 | 1.65  | 30.09 | 1.73  | 30.16 | 1.71  | 1.59 |
|    | 30.89 | 0.88  | 30.97 | 0.90  | 31.05 | 0.88  | 1.59 |
|    | 23.81 | 7.40  | 24.04 | 7.43  | 24.07 | 7.41  | 7.61 |
|    | 23.87 | 7.34  | 24.28 | 7.19  | 24.30 | 7.19  | 7.35 |
|    | 24.01 | 7.21  | 24.30 | 7.18  | 24.33 | 7.17  | 6.90 |
|    | 24.00 | 7.22  | 24.25 | 7.22  | 24.24 | 7.25  | 6.90 |
|    | 24.27 | 6.97  | 24.54 | 6.95  | 24.56 | 6.94  | 7.11 |
|    | 24.12 | 7.11  | 24.40 | 7.08  | 24.44 | 7.06  | 7.18 |
|    | 24.44 | 6.82  | 24.86 | 6.65  | 24.89 | 6.64  | 6.69 |
|    | 24.39 | 6.87  | 24.81 | 6.70  | 24.78 | 6.74  | 6.69 |
| 11 | 27.53 | 3.97  | 27.63 | 4.05  | 27.68 | 4.03  | 3.78 |
|    | 29.14 | 2.49  | 29.17 | 2.59  | 29.24 | 2.58  | 2.97 |
|    | 28.69 | 2.91  | 28.83 | 2.91  | 28.88 | 2.91  | 2.77 |
|    | 24.78 | 6.51  | 25.32 | 6.21  | 25.28 | 6.27  | 6.45 |
|    | 23.84 | 7.37  | 23.96 | 7.49  | 24.01 | 7.46  | 7.35 |
|    | 24.36 | 6.89  | 24.61 | 6.88  | 24.62 | 6.89  | 6.97 |
|    | 24.43 | 6.83  | 24.72 | 6.78  | 24.72 | 6.80  | 6.84 |
|    | 24.02 | 7.20  | 24.18 | 7.29  | 24.24 | 7.24  | 7.30 |
|    | 24.72 | 6.55  | 24.93 | 6.59  | 24.94 | 6.59  | 6.73 |
|    | 24.68 | 6.60  | 24.88 | 6.63  | 24.90 | 6.63  | 6.84 |
|    | 24.95 | 6.34  | 25.57 | 5.99  | 25.54 | 6.03  | 6.44 |
|    | 30.00 | 1.70  | 29.90 | 1.91  | 30.00 | 1.87  | 2.10 |
|    | 29.47 | 2.18  | 29.34 | 2.43  | 29.40 | 2.43  | 2.75 |
|    | 28.77 | 2.83  | 28.67 | 3.06  | 28.71 | 3.07  | 3.65 |
|    | 27.65 | 3.86  | 27.68 | 4.00  | 27.67 | 4.05  | 4.76 |
|    | 30.88 | 0.89  | 31.11 | 0.77  | 31.17 | 0.78  | 1.45 |
|    | 30.54 | 1.20  | 30.84 | 1.03  | 30.85 | 1.07  | 1.45 |
|    | 30.38 | 1.35  | 30.76 | 1.10  | 30.82 | 1.10  | 1.45 |
|    | 28.59 | 3.00  | 28.96 | 2.79  | 29.01 | 2.79  | 2.44 |
|    | 29.54 | 2.12  | 29.64 | 2.15  | 29.68 | 2.17  | 2.44 |
|    | 29.59 | 2.08  | 29.82 | 1.98  | 29.88 | 1.98  | 2.44 |
|    | 28.96 | 2.65  | 28.96 | 2.79  | 28.98 | 2.82  | 3.28 |

|    |       |      |       |      |       |      |      |
|----|-------|------|-------|------|-------|------|------|
|    | 28.06 | 3.49 | 28.37 | 3.34 | 28.42 | 3.34 | 3.28 |
|    | 29.26 | 2.38 | 29.45 | 2.33 | 29.46 | 2.37 | 3.28 |
|    | 29.49 | 2.16 | 29.69 | 2.10 | 29.73 | 2.12 | 2.38 |
|    | 28.86 | 2.74 | 29.15 | 2.61 | 29.21 | 2.61 | 2.38 |
|    | 28.83 | 2.78 | 29.10 | 2.66 | 29.15 | 2.66 | 2.38 |
|    | 27.40 | 4.09 | 27.79 | 3.89 | 27.80 | 3.92 | 4.09 |
|    | 27.47 | 4.02 | 27.86 | 3.83 | 27.87 | 3.86 | 4.09 |
|    | 26.96 | 4.50 | 27.38 | 4.28 | 27.40 | 4.30 | 4.09 |
|    | 27.11 | 4.35 | 27.54 | 4.12 | 27.60 | 4.11 | 4.08 |
|    | 27.65 | 3.86 | 27.99 | 3.71 | 28.04 | 3.70 | 4.08 |
|    | 27.74 | 3.78 | 28.06 | 3.64 | 28.11 | 3.63 | 4.08 |
|    | 28.92 | 2.69 | 29.19 | 2.58 | 29.25 | 2.56 | 2.33 |
|    | 29.61 | 2.06 | 29.79 | 2.02 | 29.83 | 2.02 | 2.33 |
|    | 28.91 | 2.70 | 29.16 | 2.60 | 29.23 | 2.59 | 2.33 |
|    | 30.30 | 1.42 | 30.50 | 1.34 | 30.57 | 1.34 | 1.62 |
|    | 30.36 | 1.37 | 30.49 | 1.35 | 30.50 | 1.40 | 1.62 |
|    | 30.08 | 1.63 | 30.38 | 1.46 | 30.40 | 1.50 | 1.62 |
|    | 31.01 | 0.77 | 31.42 | 0.47 | 31.48 | 0.48 | 1.10 |
|    | 30.41 | 1.31 | 30.79 | 1.07 | 30.87 | 1.06 | 1.10 |
|    | 30.68 | 1.07 | 31.02 | 0.85 | 31.08 | 0.86 | 1.10 |
| 12 | 29.58 | 2.09 | 29.25 | 2.52 | 29.25 | 2.56 | 2.56 |
|    | 28.32 | 3.24 | 28.42 | 3.30 | 28.45 | 3.31 | 4.04 |
|    | 29.64 | 2.03 | 29.46 | 2.32 | 29.48 | 2.35 | 2.23 |
|    | 29.31 | 2.33 | 29.39 | 2.39 | 29.45 | 2.38 | 2.47 |
|    | 28.65 | 2.94 | 28.85 | 2.90 | 28.90 | 2.90 | 2.85 |
|    | 30.34 | 1.39 | 30.56 | 1.29 | 30.60 | 1.31 | 1.07 |
|    | 30.92 | 0.85 | 31.09 | 0.79 | 31.14 | 0.80 | 1.07 |
|    | 31.13 | 0.66 | 31.24 | 0.64 | 31.31 | 0.65 | 1.07 |
|    | 26.80 | 4.64 | 27.12 | 4.52 | 27.13 | 4.55 | 4.76 |
|    | 27.30 | 4.18 | 27.34 | 4.31 | 27.38 | 4.32 | 4.46 |
|    | 30.63 | 1.11 | 30.93 | 0.94 | 30.99 | 0.95 | 1.17 |
|    | 30.24 | 1.48 | 30.42 | 1.42 | 30.46 | 1.44 | 1.17 |
|    | 30.48 | 1.26 | 30.81 | 1.06 | 30.86 | 1.06 | 1.17 |
|    | 28.80 | 2.80 | 29.01 | 2.75 | 29.07 | 2.73 | 2.98 |
|    | 29.06 | 2.56 | 29.27 | 2.50 | 29.30 | 2.52 | 2.68 |
|    | 29.87 | 1.82 | 30.21 | 1.62 | 30.23 | 1.66 | 1.18 |
|    | 30.39 | 1.33 | 30.73 | 1.13 | 30.80 | 1.12 | 1.18 |
|    | 30.87 | 0.90 | 31.10 | 0.78 | 31.16 | 0.79 | 1.18 |
|    | 30.52 | 1.22 | 30.98 | 0.89 | 31.03 | 0.91 | 1.29 |
|    | 30.25 | 1.47 | 30.58 | 1.27 | 30.63 | 1.28 | 1.29 |
|    | 30.07 | 1.63 | 30.45 | 1.39 | 30.51 | 1.39 | 1.29 |
| 13 | 24.77 | 6.51 | 25.17 | 6.36 | 25.16 | 6.39 | 6.34 |
|    | 24.04 | 7.18 | 24.38 | 7.10 | 24.41 | 7.09 | 7.41 |
|    | 23.97 | 7.25 | 24.44 | 7.05 | 24.42 | 7.08 | 7.40 |
|    | 27.86 | 3.67 | 27.59 | 4.08 | 27.65 | 4.06 | 4.11 |
|    | 28.95 | 2.66 | 28.68 | 3.06 | 28.74 | 3.04 | 1.84 |
|    | 28.28 | 3.28 | 28.26 | 3.45 | 28.28 | 3.47 | 3.14 |
|    | 28.51 | 3.07 | 28.26 | 3.45 | 28.28 | 3.47 | 2.98 |
|    | 29.68 | 2.00 | 29.80 | 2.00 | 29.87 | 1.98 | 2.16 |
|    | 28.83 | 2.77 | 28.94 | 2.81 | 28.98 | 2.82 | 2.16 |

|    |       |      |       |      |       |      |      |
|----|-------|------|-------|------|-------|------|------|
|    | 29.55 | 2.11 | 29.49 | 2.30 | 29.52 | 2.31 | 2.48 |
|    | 29.89 | 1.80 | 29.89 | 1.92 | 29.95 | 1.92 | 2.48 |
|    | 28.21 | 3.34 | 28.39 | 3.33 | 28.41 | 3.35 | 3.12 |
|    | 28.69 | 2.90 | 28.82 | 2.92 | 28.86 | 2.93 | 3.12 |
|    | 27.72 | 3.80 | 27.85 | 3.84 | 27.85 | 3.87 | 3.55 |
|    | 28.89 | 2.72 | 28.94 | 2.81 | 28.97 | 2.83 | 3.55 |
|    | 24.11 | 7.12 | 24.38 | 7.10 | 24.40 | 7.10 | 7.14 |
|    | 24.53 | 6.73 | 24.69 | 6.81 | 24.70 | 6.81 | 6.20 |
|    | 25.99 | 5.39 | 26.13 | 5.46 | 26.16 | 5.45 | 5.35 |
|    | 24.46 | 6.80 | 24.82 | 6.69 | 24.84 | 6.68 | 6.66 |
|    | 24.27 | 6.97 | 24.52 | 6.97 | 24.56 | 6.95 | 7.12 |
|    | 29.47 | 2.18 | 29.59 | 2.20 | 29.64 | 2.20 | 1.83 |
|    | 29.79 | 1.89 | 30.12 | 1.70 | 30.16 | 1.71 | 1.83 |
|    | 29.75 | 1.93 | 30.08 | 1.74 | 30.12 | 1.76 | 1.83 |
|    | 26.30 | 5.10 | 26.28 | 5.31 | 26.30 | 5.32 | 5.30 |
|    | 29.55 | 2.11 | 29.49 | 2.30 | 29.52 | 2.31 | 2.48 |
|    | 29.89 | 1.80 | 29.89 | 1.92 | 29.95 | 1.92 | 2.48 |
|    | 28.21 | 3.34 | 28.39 | 3.33 | 28.41 | 3.35 | 2.90 |
|    | 28.69 | 2.90 | 28.82 | 2.92 | 28.86 | 2.93 | 2.90 |
|    | 27.72 | 3.80 | 27.85 | 3.84 | 27.85 | 3.87 | 3.13 |
|    | 28.89 | 2.72 | 28.94 | 2.81 | 28.97 | 2.83 | 3.13 |
| 14 | 29.25 | 2.39 | 28.81 | 2.94 | 28.89 | 2.90 | 2.99 |
|    | 28.72 | 2.88 | 28.36 | 3.36 | 28.43 | 3.33 | 3.36 |
|    | 27.94 | 3.59 | 27.87 | 3.82 | 27.89 | 3.83 | 3.50 |
|    | 28.92 | 2.69 | 28.95 | 2.80 | 29.01 | 2.79 | 2.72 |
|    | 29.60 | 2.06 | 29.62 | 2.17 | 29.69 | 2.16 | 2.04 |
|    | 25.30 | 6.03 | 25.48 | 6.07 | 25.46 | 6.10 | 6.38 |
|    | 24.08 | 7.15 | 24.38 | 7.10 | 24.38 | 7.12 | 7.14 |
|    | 29.49 | 2.16 | 29.87 | 1.94 | 29.92 | 1.95 | 1.78 |
|    | 29.64 | 2.03 | 29.93 | 1.88 | 29.97 | 1.89 | 1.78 |
|    | 29.61 | 2.06 | 29.97 | 1.84 | 30.02 | 1.85 | 1.78 |
|    | 24.34 | 6.91 | 24.75 | 6.76 | 24.76 | 6.76 | 6.94 |
|    | 24.83 | 6.46 | 25.30 | 6.23 | 25.32 | 6.24 | 6.42 |
|    | 23.91 | 7.30 | 24.13 | 7.34 | 24.14 | 7.34 | 7.24 |
|    | 24.26 | 6.99 | 24.74 | 6.76 | 24.74 | 6.78 | 6.98 |
|    | 24.84 | 6.45 | 25.34 | 6.20 | 25.31 | 6.25 | 6.51 |
|    | 25.37 | 5.96 | 25.87 | 5.70 | 25.80 | 5.79 | 6.23 |
|    | 24.90 | 6.39 | 25.34 | 6.20 | 25.35 | 6.21 | 6.46 |
|    | 24.25 | 6.99 | 24.69 | 6.81 | 24.70 | 6.81 | 7.05 |
|    | 23.65 | 7.54 | 24.14 | 7.33 | 24.18 | 7.30 | 7.41 |
|    | 24.40 | 6.86 | 24.87 | 6.64 | 24.86 | 6.67 | 6.97 |
|    | 24.37 | 6.89 | 24.78 | 6.72 | 24.81 | 6.72 | 6.81 |
| 15 | 29.12 | 2.51 | 28.95 | 2.80 | 28.96 | 2.84 | 2.23 |
|    | 26.81 | 4.63 | 26.82 | 4.81 | 26.85 | 4.81 | 5.41 |
|    | 27.97 | 3.57 | 27.55 | 4.12 | 27.55 | 4.16 | 3.58 |
|    | 26.55 | 4.87 | 26.27 | 5.32 | 26.28 | 5.34 | 5.68 |
|    | 30.25 | 1.47 | 30.64 | 1.21 | 30.71 | 1.20 | 1.02 |
|    | 30.68 | 1.07 | 30.98 | 0.90 | 31.06 | 0.88 | 1.02 |
|    | 30.26 | 1.46 | 30.58 | 1.27 | 30.63 | 1.28 | 1.02 |
|    | 23.50 | 7.68 | 23.82 | 7.63 | 23.81 | 7.65 | 8.01 |

|    |       |      |       |      |       |      |      |
|----|-------|------|-------|------|-------|------|------|
|    | 23.68 | 7.51 | 24.07 | 7.40 | 24.08 | 7.39 | 7.42 |
|    | 23.73 | 7.47 | 24.02 | 7.44 | 24.04 | 7.43 | 7.54 |
|    | 24.07 | 7.16 | 24.42 | 7.07 | 24.43 | 7.07 | 7.42 |
|    | 24.05 | 7.18 | 24.28 | 7.19 | 24.27 | 7.22 | 8.01 |
|    | 25.82 | 5.54 | 25.71 | 5.85 | 25.73 | 5.85 | 6.36 |
|    | 29.47 | 2.18 | 29.81 | 2.00 | 29.86 | 2.00 | 1.68 |
|    | 29.81 | 1.87 | 30.08 | 1.74 | 30.12 | 1.76 | 1.68 |
|    | 29.95 | 1.74 | 30.26 | 1.57 | 30.29 | 1.60 | 1.68 |
|    | 25.38 | 5.95 | 25.50 | 6.05 | 25.49 | 6.08 | 5.39 |
|    | 29.88 | 1.81 | 29.74 | 2.06 | 29.78 | 2.07 | 1.99 |
|    | 29.22 | 2.41 | 29.20 | 2.57 | 29.24 | 2.58 | 2.37 |
|    | 27.33 | 4.15 | 27.11 | 4.53 | 27.17 | 4.51 | 5.48 |
|    | 29.85 | 1.84 | 30.22 | 1.60 | 30.25 | 1.63 | 0.97 |
|    | 30.71 | 1.04 | 30.92 | 0.95 | 31.02 | 0.92 | 0.97 |
|    | 30.93 | 0.84 | 31.14 | 0.74 | 31.21 | 0.73 | 0.97 |
|    | 30.58 | 1.16 | 30.79 | 1.07 | 30.85 | 1.08 | 1.02 |
|    | 30.74 | 1.02 | 30.89 | 0.98 | 30.97 | 0.96 | 1.02 |
|    | 30.47 | 1.26 | 30.62 | 1.23 | 30.68 | 1.23 | 1.02 |
|    | 26.88 | 4.57 | 26.66 | 4.96 | 26.70 | 4.95 | 5.39 |
|    | 24.49 | 6.77 | 24.65 | 6.85 | 24.67 | 6.84 | 6.75 |
|    | 28.51 | 3.07 | 28.85 | 2.89 | 28.90 | 2.89 | 1.73 |
|    | 29.60 | 2.07 | 29.85 | 1.96 | 29.90 | 1.96 | 1.73 |
|    | 29.60 | 2.07 | 29.93 | 1.88 | 29.99 | 1.88 | 1.73 |
|    | 29.60 | 2.07 | 29.83 | 1.98 | 29.88 | 1.98 | 2.05 |
|    | 28.79 | 2.81 | 29.17 | 2.60 | 29.18 | 2.63 | 2.05 |
|    | 29.76 | 1.92 | 30.06 | 1.76 | 30.08 | 1.80 | 2.05 |
|    | 29.60 | 2.07 | 29.90 | 1.91 | 29.95 | 1.92 | 2.27 |
|    | 28.94 | 2.67 | 29.37 | 2.40 | 29.40 | 2.43 | 2.27 |
|    | 29.12 | 2.50 | 29.57 | 2.22 | 29.59 | 2.25 | 2.27 |
|    | 28.91 | 2.70 | 29.31 | 2.46 | 29.32 | 2.51 | 2.18 |
|    | 29.60 | 2.07 | 29.91 | 1.90 | 29.90 | 1.96 | 2.18 |
|    | 29.81 | 1.87 | 30.00 | 1.81 | 30.09 | 1.78 | 2.18 |
|    | 29.43 | 2.22 | 29.68 | 2.12 | 29.73 | 2.12 | 2.02 |
|    | 28.88 | 2.73 | 29.24 | 2.53 | 29.27 | 2.55 | 2.02 |
|    | 29.40 | 2.25 | 29.74 | 2.06 | 29.78 | 2.07 | 2.02 |
|    | 29.38 | 2.27 | 29.65 | 2.14 | 29.71 | 2.13 | 2.00 |
|    | 29.31 | 2.33 | 29.73 | 2.07 | 29.72 | 2.13 | 2.00 |
|    | 29.18 | 2.45 | 29.56 | 2.23 | 29.61 | 2.23 | 2.00 |
| 16 | 27.50 | 4.00 | 28.01 | 3.68 | 28.04 | 3.70 | 3.75 |
|    | 25.84 | 5.53 | 26.13 | 5.45 | 26.10 | 5.51 | 5.21 |
|    | 26.37 | 5.04 | 26.38 | 5.22 | 26.39 | 5.24 | 5.04 |
|    | 26.84 | 4.60 | 26.83 | 4.80 | 26.90 | 4.76 | 4.57 |
|    | 26.41 | 5.00 | 26.46 | 5.14 | 26.48 | 5.16 | 5.03 |
|    | 25.87 | 5.50 | 25.95 | 5.62 | 25.98 | 5.62 | 5.44 |
|    | 24.37 | 6.88 | 24.93 | 6.58 | 24.93 | 6.60 | 6.62 |
|    | 24.81 | 6.48 | 25.42 | 6.12 | 25.39 | 6.17 | 6.30 |
|    | 24.42 | 6.83 | 25.00 | 6.52 | 25.02 | 6.52 | 6.58 |
| 17 | 24.47 | 6.79 | 25.10 | 6.43 | 25.06 | 6.49 | 6.49 |
|    | 29.69 | 1.99 | 29.99 | 1.83 | 30.06 | 1.82 | 1.77 |
|    | 27.66 | 3.85 | 27.73 | 3.95 | 27.84 | 3.89 | 3.46 |



|    |       |      |       |      |       |      |      |
|----|-------|------|-------|------|-------|------|------|
|    | 28.33 | 3.23 | 28.21 | 3.50 | 28.31 | 3.45 | 3.39 |
|    | 26.00 | 5.38 | 25.99 | 5.59 | 26.05 | 5.55 | 5.59 |
|    | 27.96 | 3.57 | 28.14 | 3.57 | 28.22 | 3.53 | 4.08 |
|    | 27.94 | 3.60 | 27.94 | 3.76 | 28.03 | 3.71 | 3.62 |
|    | 27.28 | 4.20 | 27.14 | 4.50 | 27.23 | 4.46 | 4.18 |
|    | 28.05 | 3.49 | 27.96 | 3.73 | 28.05 | 3.69 | 2.76 |
|    | 28.17 | 3.38 | 28.33 | 3.38 | 28.43 | 3.33 | 3.25 |
|    | 27.98 | 3.56 | 28.25 | 3.46 | 28.37 | 3.39 | 3.23 |
|    | 28.24 | 3.32 | 28.50 | 3.22 | 28.59 | 3.19 | 3.11 |
|    | 28.45 | 3.12 | 28.34 | 3.37 | 28.40 | 3.36 | 2.94 |
|    | 29.54 | 2.12 | 29.63 | 2.16 | 29.69 | 2.16 | 2.04 |
|    | 27.52 | 3.98 | 27.89 | 3.80 | 27.93 | 3.80 | 3.93 |
|    | 27.32 | 4.17 | 27.40 | 4.26 | 27.47 | 4.23 | 4.29 |
|    | 29.42 | 2.23 | 29.66 | 2.13 | 29.69 | 2.16 | 2.36 |
|    | 29.48 | 2.18 | 29.54 | 2.25 | 29.57 | 2.27 | 1.90 |
|    | 28.71 | 2.88 | 28.72 | 3.02 | 28.77 | 3.02 | 2.28 |
|    | 29.72 | 1.95 | 29.85 | 1.96 | 29.94 | 1.92 | 2.01 |
|    | 26.52 | 4.90 | 26.48 | 5.13 | 26.51 | 5.13 | 5.36 |
|    | 29.27 | 2.36 | 29.33 | 2.45 | 29.38 | 2.45 | 2.18 |
|    | 27.28 | 4.20 | 27.67 | 4.01 | 27.68 | 4.03 | 4.03 |
|    | 27.72 | 3.79 | 27.93 | 3.76 | 27.93 | 3.80 | 3.58 |
|    | 30.58 | 1.17 | 30.82 | 1.04 | 30.90 | 1.02 | 0.89 |
|    | 29.75 | 1.93 | 29.92 | 1.89 | 29.98 | 1.89 | 0.89 |
|    | 30.02 | 1.68 | 30.34 | 1.49 | 30.40 | 1.49 | 0.89 |
|    | 23.12 | 8.03 | 23.36 | 8.06 | 23.35 | 8.08 | 8.16 |
|    | 23.66 | 7.54 | 24.01 | 7.45 | 24.02 | 7.45 | 7.57 |
|    | 23.58 | 7.61 | 23.83 | 7.62 | 23.86 | 7.60 | 7.66 |
|    | 23.69 | 7.50 | 24.04 | 7.42 | 24.06 | 7.42 | 7.57 |
|    | 23.06 | 8.09 | 23.32 | 8.10 | 23.30 | 8.12 | 8.16 |
|    | 27.24 | 4.24 | 27.69 | 3.99 | 27.72 | 4.00 | 3.62 |
|    | 27.72 | 3.80 | 28.18 | 3.53 | 28.21 | 3.54 | 3.56 |
|    | 27.50 | 4.00 | 27.98 | 3.71 | 28.03 | 3.71 | 3.75 |
|    | 27.38 | 4.11 | 27.68 | 3.99 | 27.74 | 3.98 | 3.89 |
| 18 | 24.20 | 7.04 | 24.57 | 6.93 | 24.58 | 6.93 | 6.62 |
|    | 29.27 | 2.37 | 29.41 | 2.37 | 29.49 | 2.34 | 1.98 |
|    | 27.85 | 3.67 | 28.03 | 3.67 | 28.08 | 3.66 | 3.11 |
|    | 25.24 | 6.08 | 25.50 | 6.05 | 25.52 | 6.05 | 5.70 |
|    | 27.71 | 3.80 | 27.90 | 3.79 | 28.00 | 3.73 | 3.49 |
|    | 29.02 | 2.60 | 28.98 | 2.77 | 29.07 | 2.74 | 2.20 |
|    | 28.51 | 3.07 | 28.22 | 3.49 | 28.26 | 3.49 | 3.11 |
|    | 29.60 | 2.06 | 29.37 | 2.41 | 29.46 | 2.37 | 2.77 |
|    | 29.29 | 2.35 | 29.49 | 2.29 | 29.55 | 2.29 | 2.11 |
|    | 30.26 | 1.46 | 30.40 | 1.44 | 30.44 | 1.45 | 0.94 |
|    | 28.76 | 2.84 | 28.60 | 3.13 | 28.66 | 3.11 | 2.87 |
|    | 27.20 | 4.27 | 27.66 | 4.02 | 27.70 | 4.01 | 3.58 |
|    | 27.67 | 3.84 | 27.89 | 3.80 | 27.90 | 3.83 | 4.25 |
|    | 29.78 | 1.90 | 29.88 | 1.93 | 29.94 | 1.93 | 1.93 |
|    | 29.65 | 2.02 | 29.76 | 2.04 | 29.84 | 2.02 | 2.10 |
|    | 27.05 | 4.42 | 27.23 | 4.42 | 27.28 | 4.41 | 4.56 |
|    | 29.96 | 1.73 | 30.24 | 1.58 | 30.32 | 1.57 | 1.81 |

|           |       |      |       |      |       |      |      |
|-----------|-------|------|-------|------|-------|------|------|
|           | 29.64 | 2.03 | 29.91 | 1.90 | 29.97 | 1.90 | 1.81 |
|           | 29.00 | 2.61 | 29.32 | 2.45 | 29.36 | 2.47 | 1.81 |
|           | 30.48 | 1.25 | 30.85 | 1.02 | 30.91 | 1.02 | 1.17 |
|           | 29.96 | 1.73 | 30.35 | 1.48 | 30.39 | 1.50 | 1.17 |
|           | 30.37 | 1.36 | 30.80 | 1.06 | 30.85 | 1.07 | 1.17 |
|           | 29.71 | 1.97 | 29.83 | 1.97 | 29.89 | 1.97 | 1.11 |
|           | 30.63 | 1.12 | 30.80 | 1.06 | 30.87 | 1.05 | 1.11 |
|           | 30.41 | 1.32 | 30.52 | 1.32 | 30.59 | 1.32 | 1.11 |
| <b>19</b> | 25.14 | 6.17 | 25.82 | 5.74 | 25.77 | 5.82 | 5.97 |
|           | 28.93 | 2.68 | 29.23 | 2.53 | 29.26 | 2.56 | 2.91 |
|           | 28.84 | 2.77 | 29.12 | 2.64 | 29.14 | 2.67 | 2.74 |
|           | 27.16 | 4.31 | 26.88 | 4.75 | 26.94 | 4.73 | 4.97 |
|           | 27.93 | 3.60 | 27.77 | 3.91 | 27.80 | 3.92 | 4.74 |
|           | 25.14 | 6.17 | 25.76 | 5.80 | 25.72 | 5.87 | 6.00 |
|           | 26.47 | 4.95 | 26.53 | 5.07 | 26.60 | 5.04 | 5.11 |
|           | 24.48 | 6.78 | 24.73 | 6.77 | 24.76 | 6.76 | 6.99 |
|           | 24.70 | 6.58 | 24.97 | 6.54 | 24.96 | 6.58 | 6.99 |
|           | 24.57 | 6.70 | 25.09 | 6.43 | 25.08 | 6.46 | 6.73 |
|           | 24.62 | 6.65 | 25.18 | 6.35 | 25.12 | 6.42 | 6.71 |
|           | 26.40 | 5.01 | 26.35 | 5.25 | 26.38 | 5.25 | 6.99 |
|           | 24.15 | 7.08 | 24.47 | 7.01 | 24.50 | 7.01 | 6.99 |
|           | 27.07 | 4.39 | 27.19 | 4.45 | 27.25 | 4.44 | 4.31 |
|           | 25.26 | 6.06 | 25.76 | 5.80 | 25.78 | 5.81 | 6.01 |
|           | 27.54 | 3.96 | 27.42 | 4.24 | 27.44 | 4.25 | 4.02 |
| <b>20</b> | 27.80 | 3.72 | 27.69 | 3.99 | 27.74 | 3.98 | 3.96 |
|           | 29.36 | 2.29 | 29.43 | 2.35 | 29.50 | 2.34 | 2.35 |
|           | 30.31 | 1.41 | 30.38 | 1.46 | 30.41 | 1.48 | 1.44 |
|           | 28.65 | 2.94 | 28.43 | 3.29 | 28.50 | 3.27 | 3.13 |
|           | 31.02 | 0.75 | 30.48 | 1.37 | 30.53 | 1.38 | 1.26 |
|           | 28.01 | 3.53 | 27.57 | 4.10 | 27.60 | 4.11 | 3.85 |
|           | 23.00 | 8.14 | 23.37 | 8.05 | 23.36 | 8.07 | 8.08 |
|           | 23.97 | 7.25 | 24.25 | 7.22 | 24.30 | 7.19 | 7.24 |
|           | 24.12 | 7.11 | 24.42 | 7.06 | 24.45 | 7.06 | 7.08 |
|           | 24.02 | 7.21 | 24.31 | 7.17 | 24.31 | 7.18 | 7.16 |
|           | 29.73 | 1.95 | 29.80 | 2.00 | 29.86 | 2.00 | 1.89 |
|           | 29.89 | 1.80 | 29.96 | 1.85 | 30.01 | 1.86 | 1.87 |
|           | 28.53 | 3.05 | 28.76 | 2.98 | 28.81 | 2.98 | 3.21 |
|           | 28.75 | 2.85 | 28.68 | 3.05 | 28.69 | 3.09 | 2.87 |
|           | 28.94 | 2.67 | 29.03 | 2.72 | 29.08 | 2.72 | 2.74 |
|           | 27.86 | 3.67 | 28.06 | 3.64 | 28.08 | 3.66 | 3.71 |
|           | 25.24 | 6.08 | 25.50 | 6.05 | 25.50 | 6.07 | 5.92 |
|           | 27.55 | 3.95 | 27.62 | 4.06 | 27.63 | 4.08 | 4.05 |
|           | 27.43 | 4.06 | 27.78 | 3.91 | 27.81 | 3.91 | 4.14 |
|           | 27.45 | 4.05 | 27.51 | 4.16 | 27.56 | 4.14 | 4.27 |
|           | 28.63 | 2.96 | 28.73 | 3.01 | 28.77 | 3.01 | 3.11 |
|           | 28.97 | 2.64 | 29.22 | 2.55 | 29.26 | 2.56 | 2.66 |
| <b>21</b> | 22.91 | 8.22 | 23.33 | 8.09 | 23.28 | 8.14 | 8.23 |
|           | 29.74 | 1.94 | 29.77 | 2.03 | 29.83 | 2.03 | 1.72 |
|           | 28.32 | 3.25 | 28.23 | 3.48 | 28.24 | 3.51 | 3.24 |
|           | 28.12 | 3.43 | 28.27 | 3.44 | 28.30 | 3.45 | 3.18 |

|    |       |      |       |      |       |      |      |
|----|-------|------|-------|------|-------|------|------|
|    | 29.69 | 1.99 | 29.69 | 2.11 | 29.74 | 2.11 | 2.46 |
|    | 27.70 | 3.81 | 27.79 | 3.90 | 27.80 | 3.92 | 3.62 |
|    | 23.90 | 7.31 | 24.20 | 7.27 | 24.19 | 7.29 | 7.26 |
|    | 24.10 | 7.13 | 24.42 | 7.06 | 24.45 | 7.05 | 7.18 |
|    | 24.02 | 7.20 | 24.35 | 7.13 | 24.38 | 7.12 | 7.29 |
|    | 29.32 | 2.32 | 29.05 | 2.71 | 29.11 | 2.70 | 2.88 |
|    | 27.96 | 3.57 | 27.68 | 4.00 | 27.73 | 3.99 | 3.86 |
|    | 28.98 | 2.64 | 29.13 | 2.63 | 29.12 | 2.69 | 1.78 |
|    | 30.32 | 1.40 | 30.60 | 1.25 | 30.65 | 1.26 | 1.78 |
|    | 27.37 | 4.12 | 27.23 | 4.42 | 27.28 | 4.41 | 4.45 |
|    | 28.43 | 3.14 | 28.14 | 3.57 | 28.18 | 3.57 | 2.74 |
|    | 28.81 | 2.79 | 28.88 | 2.87 | 28.91 | 2.89 | 3.36 |
|    | 26.00 | 5.38 | 26.18 | 5.41 | 26.21 | 5.41 | 5.43 |
|    | 29.43 | 2.22 | 29.37 | 2.41 | 29.40 | 2.43 | 2.14 |
|    | 28.59 | 2.99 | 28.73 | 3.01 | 28.78 | 3.01 | 3.03 |
|    | 29.43 | 2.22 | 29.54 | 2.25 | 29.63 | 2.22 | 1.73 |
|    | 28.88 | 2.73 | 28.60 | 3.13 | 28.69 | 3.09 | 2.57 |
|    | 30.02 | 1.68 | 30.29 | 1.54 | 30.35 | 1.54 | 1.78 |
|    | 27.39 | 4.10 | 27.37 | 4.29 | 27.44 | 4.26 | 4.62 |
|    | 29.38 | 2.27 | 29.61 | 2.18 | 29.63 | 2.21 | 1.72 |
|    | 29.86 | 1.83 | 30.24 | 1.59 | 30.28 | 1.61 | 1.72 |
|    | 29.95 | 1.74 | 30.35 | 1.49 | 30.39 | 1.50 | 1.72 |
|    | 25.78 | 5.58 | 25.99 | 5.58 | 26.02 | 5.59 | 5.62 |
|    | 28.07 | 3.47 | 28.16 | 3.54 | 28.20 | 3.55 | 3.59 |
|    | 28.66 | 2.93 | 28.45 | 3.27 | 28.49 | 3.28 | 2.91 |
|    | 29.93 | 1.76 | 30.04 | 1.78 | 30.06 | 1.81 | 1.62 |
|    | 29.70 | 1.97 | 29.79 | 2.01 | 29.86 | 2.00 | 2.04 |
|    | 28.74 | 2.86 | 28.58 | 3.15 | 28.61 | 3.16 | 3.03 |
|    | 30.20 | 1.51 | 29.77 | 2.03 | 29.83 | 2.02 | 1.61 |
|    | 28.41 | 3.16 | 28.17 | 3.54 | 28.25 | 3.51 | 3.06 |
|    | 24.78 | 6.51 | 24.95 | 6.57 | 24.95 | 6.58 | 6.52 |
|    | 24.23 | 7.01 | 24.46 | 7.03 | 24.49 | 7.01 | 7.17 |
|    | 24.53 | 6.73 | 24.84 | 6.67 | 24.87 | 6.66 | 6.85 |
|    | 24.22 | 7.02 | 24.44 | 7.04 | 24.46 | 7.04 | 7.09 |
|    | 28.50 | 3.08 | 28.73 | 3.01 | 28.76 | 3.03 | 3.18 |
|    | 28.89 | 2.72 | 29.12 | 2.64 | 29.14 | 2.67 | 2.71 |
|    | 28.37 | 3.20 | 28.17 | 3.53 | 28.23 | 3.52 | 3.51 |
| 22 | 29.49 | 2.16 | 29.59 | 2.20 | 29.65 | 2.20 | 1.52 |
|    | 30.15 | 1.55 | 30.26 | 1.57 | 30.33 | 1.56 | 1.52 |
|    | 30.09 | 1.62 | 30.28 | 1.56 | 30.35 | 1.54 | 1.52 |
|    | 29.69 | 1.98 | 29.97 | 1.85 | 30.01 | 1.86 | 1.52 |
|    | 30.40 | 1.33 | 30.64 | 1.21 | 30.71 | 1.20 | 1.52 |
|    | 30.06 | 1.64 | 30.29 | 1.54 | 30.37 | 1.53 | 1.52 |
|    | 24.90 | 6.40 | 25.02 | 6.50 | 25.06 | 6.48 | 6.16 |
|    | 23.86 | 7.35 | 24.20 | 7.28 | 24.23 | 7.25 | 7.21 |
|    | 23.80 | 7.40 | 24.17 | 7.30 | 24.19 | 7.30 | 7.32 |
|    | 28.60 | 2.99 | 28.50 | 3.22 | 28.51 | 3.26 | 3.27 |
|    | 28.36 | 3.21 | 28.47 | 3.26 | 28.50 | 3.27 | 3.35 |
|    | 24.09 | 7.14 | 24.39 | 7.09 | 24.44 | 7.06 | 6.93 |
|    | 24.01 | 7.21 | 24.30 | 7.17 | 24.35 | 7.15 | 7.03 |

|    |       |       |       |       |       |       |      |
|----|-------|-------|-------|-------|-------|-------|------|
|    | 24.19 | 7.05  | 24.44 | 7.05  | 24.48 | 7.02  | 7.48 |
|    | 25.88 | 5.49  | 26.24 | 5.35  | 26.30 | 5.32  | 5.10 |
|    | 25.91 | 5.46  | 26.20 | 5.39  | 26.25 | 5.37  | 4.99 |
|    | 23.99 | 7.23  | 24.24 | 7.24  | 24.26 | 7.23  | 7.39 |
|    | 23.73 | 7.47  | 24.15 | 7.32  | 24.16 | 7.32  | 7.49 |
|    | 24.11 | 7.12  | 24.42 | 7.07  | 24.45 | 7.05  | 7.10 |
|    | 23.95 | 7.27  | 24.24 | 7.23  | 24.28 | 7.21  | 7.19 |
|    | 30.15 | 1.56  | 30.47 | 1.37  | 30.51 | 1.39  | 1.57 |
|    | 30.02 | 1.67  | 30.27 | 1.56  | 30.32 | 1.56  | 1.57 |
|    | 30.18 | 1.54  | 30.47 | 1.37  | 30.50 | 1.40  | 1.57 |
|    | 31.66 | 0.17  | 31.61 | 0.30  | 31.67 | 0.31  | 1.29 |
|    | 31.18 | 0.61  | 31.40 | 0.50  | 31.47 | 0.50  | 1.29 |
|    | 33.19 | -1.24 | 33.17 | -1.17 | 33.22 | -1.14 | 1.29 |
| 23 | 27.33 | 4.16  | 27.14 | 4.50  | 27.19 | 4.49  | 4.62 |
|    | 28.68 | 2.91  | 28.59 | 3.14  | 28.67 | 3.11  | 5.01 |
|    | 28.88 | 2.73  | 28.80 | 2.94  | 28.86 | 2.93  | 2.05 |
|    | 31.02 | 0.76  | 30.83 | 1.04  | 30.92 | 1.01  | 1.60 |
|    | 26.57 | 4.86  | 26.70 | 4.92  | 26.74 | 4.91  | 5.58 |
|    | 26.83 | 4.61  | 26.67 | 4.94  | 26.73 | 4.93  | 4.68 |
|    | 28.07 | 3.47  | 28.21 | 3.49  | 28.26 | 3.49  | 3.90 |
|    | 28.45 | 3.12  | 28.62 | 3.11  | 28.70 | 3.08  | 3.09 |
|    | 28.59 | 2.99  | 28.56 | 3.17  | 28.61 | 3.16  | 3.70 |
|    | 29.04 | 2.58  | 29.32 | 2.45  | 29.37 | 2.45  | 2.80 |
|    | 29.70 | 1.97  | 29.82 | 1.98  | 29.89 | 1.97  | 2.71 |
|    | 30.53 | 1.21  | 30.50 | 1.35  | 30.60 | 1.31  | 1.81 |
|    | 30.58 | 1.16  | 30.61 | 1.24  | 30.66 | 1.25  | 1.81 |
|    | 27.25 | 4.23  | 27.15 | 4.50  | 27.21 | 4.47  | 4.85 |
|    | 30.11 | 1.59  | 30.25 | 1.58  | 30.31 | 1.58  | 1.81 |
|    | 30.37 | 1.35  | 30.46 | 1.38  | 30.56 | 1.35  | 1.81 |
|    | 28.02 | 3.52  | 27.93 | 3.76  | 27.98 | 3.75  | 4.32 |
|    | 28.63 | 2.96  | 28.89 | 2.85  | 28.95 | 2.85  | 3.06 |
|    | 29.09 | 2.54  | 29.41 | 2.37  | 29.45 | 2.38  | 3.06 |
|    | 27.51 | 3.99  | 27.89 | 3.80  | 27.96 | 3.78  | 3.95 |
|    | 27.63 | 3.88  | 28.13 | 3.58  | 28.21 | 3.54  | 3.92 |
|    | 26.64 | 4.79  | 26.98 | 4.66  | 26.98 | 4.69  | 4.13 |
|    | 27.31 | 4.18  | 27.68 | 4.00  | 27.72 | 4.00  | 3.85 |
|    | 23.83 | 7.37  | 23.84 | 7.61  | 23.85 | 7.61  | 8.03 |

<sup>[a]</sup> Parameters of linear regression models are presented in Table 2 in main text.

<sup>[b]</sup> For the references to the experimental works, please, see the main text.

**Table S2.** Calculated <sup>1</sup>H NMR shielding constants, together with scaled and experimental chemical shifts – the GIAO-DFT(PBE0) calculations with the second-level basis sets.

| Mol. | pcS-2    |                         | pecS-2   |                         | pecS-2 mod |                         | $\delta_{exp}^{[b]}$ |
|------|----------|-------------------------|----------|-------------------------|------------|-------------------------|----------------------|
|      | $\sigma$ | $\delta_{scaled}^{[a]}$ | $\sigma$ | $\delta_{scaled}^{[a]}$ | $\sigma$   | $\delta_{scaled}^{[a]}$ |                      |
| 1    | 28.41    | 3.06                    | 28.34    | 3.09                    | 28.36      | 3.11                    | 4.38                 |
|      | 29.89    | 1.72                    | 29.80    | 1.76                    | 29.84      | 1.76                    | 2.51                 |

|   |       |      |       |      |       |      |      |
|---|-------|------|-------|------|-------|------|------|
|   | 30.39 | 1.26 | 30.32 | 1.28 | 30.36 | 1.28 | 2.31 |
|   | 28.81 | 2.69 | 28.77 | 2.69 | 28.80 | 2.70 | 3.53 |
|   | 28.79 | 2.71 | 28.75 | 2.71 | 28.77 | 2.73 | 3.21 |
|   | 27.43 | 3.95 | 27.37 | 3.97 | 27.42 | 3.96 | 4.03 |
|   | 28.95 | 2.57 | 28.91 | 2.57 | 28.93 | 2.58 | 3.18 |
|   | 28.40 | 3.07 | 28.41 | 3.02 | 28.44 | 3.03 | 3.34 |
|   | 28.62 | 2.87 | 28.60 | 2.85 | 28.64 | 2.85 | 3.24 |
|   | 28.82 | 2.68 | 28.81 | 2.66 | 28.85 | 2.66 | 2.80 |
|   | 28.40 | 3.07 | 28.33 | 3.10 | 28.38 | 3.09 | 3.00 |
|   | 28.13 | 3.32 | 28.05 | 3.35 | 28.10 | 3.34 | 3.27 |
|   | 25.47 | 5.73 | 25.43 | 5.73 | 25.48 | 5.73 | 5.42 |
|   | 23.67 | 7.37 | 23.66 | 7.35 | 23.71 | 7.34 | 7.45 |
|   | 24.24 | 6.85 | 24.20 | 6.86 | 24.23 | 6.86 | 7.25 |
|   | 29.27 | 2.28 | 29.21 | 2.29 | 29.26 | 2.28 | 0.99 |
|   | 29.79 | 1.81 | 29.79 | 1.77 | 29.82 | 1.77 | 0.99 |
|   | 29.81 | 1.79 | 29.81 | 1.75 | 29.84 | 1.75 | 0.99 |
|   | 24.10 | 6.98 | 24.11 | 6.93 | 24.15 | 6.94 | 7.01 |
|   | 24.13 | 6.95 | 24.13 | 6.92 | 24.17 | 6.92 | 7.05 |
|   | 23.21 | 7.78 | 23.18 | 7.78 | 23.23 | 7.78 | 7.81 |
|   | 22.70 | 8.25 | 22.66 | 8.25 | 22.70 | 8.26 | 8.11 |
|   | 23.55 | 7.48 | 23.52 | 7.47 | 23.58 | 7.46 | 7.47 |
|   | 23.73 | 7.32 | 23.71 | 7.30 | 23.75 | 7.31 | 7.40 |
|   | 23.93 | 7.14 | 23.92 | 7.11 | 23.97 | 7.10 | 7.10 |
| 2 | 24.09 | 6.99 | 24.09 | 6.95 | 24.14 | 6.95 | 6.94 |
|   | 23.70 | 7.34 | 23.66 | 7.34 | 23.70 | 7.35 | 7.62 |
|   | 23.83 | 7.22 | 23.82 | 7.20 | 23.86 | 7.20 | 7.09 |
|   | 23.97 | 7.10 | 23.96 | 7.07 | 24.01 | 7.07 | 7.19 |
|   | 23.46 | 7.56 | 23.44 | 7.54 | 23.50 | 7.54 | 7.36 |
|   | 24.62 | 6.51 | 24.58 | 6.51 | 24.65 | 6.49 | 6.94 |
|   | 23.87 | 7.19 | 23.85 | 7.17 | 23.90 | 7.17 | 7.36 |
|   | 24.18 | 6.90 | 24.18 | 6.87 | 24.22 | 6.88 | 7.19 |
|   | 23.96 | 7.10 | 23.95 | 7.08 | 23.99 | 7.08 | 7.09 |
|   | 23.84 | 7.22 | 23.80 | 7.22 | 23.84 | 7.23 | 7.62 |
|   | 23.27 | 7.73 | 23.24 | 7.72 | 23.29 | 7.72 | 7.73 |
|   | 24.17 | 6.91 | 24.17 | 6.88 | 24.21 | 6.89 | 6.89 |
|   | 23.53 | 7.49 | 23.52 | 7.47 | 23.57 | 7.47 | 7.51 |
|   | 24.25 | 6.84 | 24.23 | 6.82 | 24.27 | 6.83 | 6.91 |
| 3 | 27.04 | 4.30 | 26.88 | 4.41 | 26.94 | 4.40 | 4.18 |
|   | 28.13 | 3.32 | 28.05 | 3.35 | 28.10 | 3.34 | 2.88 |
|   | 29.44 | 2.13 | 29.39 | 2.13 | 29.41 | 2.15 | 2.20 |
|   | 28.66 | 2.84 | 28.58 | 2.87 | 28.62 | 2.87 | 2.60 |
|   | 28.82 | 2.69 | 28.77 | 2.70 | 28.80 | 2.70 | 2.35 |
|   | 29.76 | 1.83 | 29.69 | 1.86 | 29.73 | 1.86 | 1.81 |
|   | 30.04 | 1.58 | 30.00 | 1.58 | 30.03 | 1.58 | 1.51 |
|   | 29.88 | 1.72 | 29.80 | 1.76 | 29.85 | 1.75 | 2.34 |
|   | 25.11 | 6.06 | 25.03 | 6.10 | 25.08 | 6.09 | 6.40 |
|   | 28.63 | 2.86 | 28.59 | 2.86 | 28.62 | 2.86 | 2.80 |
|   | 29.84 | 1.76 | 29.80 | 1.76 | 29.82 | 1.77 | 1.97 |
|   | 29.40 | 2.16 | 29.40 | 2.12 | 29.42 | 2.14 | 1.94 |
|   | 29.77 | 1.83 | 29.73 | 1.82 | 29.77 | 1.82 | 1.57 |

|   |       |      |       |      |       |      |      |
|---|-------|------|-------|------|-------|------|------|
|   | 28.58 | 2.91 | 28.54 | 2.90 | 28.58 | 2.90 | 3.24 |
|   | 27.46 | 3.92 | 27.42 | 3.92 | 27.46 | 3.92 | 3.80 |
|   | 29.26 | 2.29 | 29.25 | 2.26 | 29.27 | 2.27 | 2.44 |
|   | 29.05 | 2.48 | 29.03 | 2.46 | 29.06 | 2.47 | 2.54 |
|   | 28.94 | 2.58 | 28.83 | 2.64 | 28.89 | 2.62 | 2.07 |
|   | 29.10 | 2.44 | 29.07 | 2.42 | 29.10 | 2.43 | 2.31 |
|   | 29.27 | 2.28 | 29.14 | 2.36 | 29.19 | 2.35 | 1.70 |
|   | 30.14 | 1.49 | 30.08 | 1.50 | 30.12 | 1.50 | 1.61 |
|   | 30.15 | 1.48 | 30.14 | 1.45 | 30.16 | 1.46 | 1.47 |
|   | 30.21 | 1.43 | 30.17 | 1.42 | 30.20 | 1.42 | 1.47 |
|   | 30.44 | 1.22 | 30.37 | 1.24 | 30.41 | 1.24 | 1.38 |
|   | 30.01 | 1.61 | 29.98 | 1.59 | 30.02 | 1.59 | 1.38 |
|   | 25.52 | 5.68 | 25.52 | 5.66 | 25.55 | 5.66 | 5.58 |
|   | 29.17 | 2.37 | 29.16 | 2.34 | 29.19 | 2.35 | 2.56 |
|   | 29.19 | 2.35 | 29.16 | 2.34 | 29.20 | 2.34 | 2.58 |
|   | 29.85 | 1.76 | 29.83 | 1.73 | 29.85 | 1.74 | 1.86 |
|   | 28.44 | 3.04 | 28.31 | 3.11 | 28.37 | 3.09 | 2.43 |
|   | 25.84 | 5.40 | 25.81 | 5.39 | 25.85 | 5.39 | 5.47 |
|   | 22.66 | 8.29 | 22.62 | 8.29 | 22.66 | 8.30 | 8.33 |
|   | 23.12 | 7.87 | 23.10 | 7.86 | 23.14 | 7.86 | 8.02 |
|   | 23.67 | 7.37 | 23.60 | 7.40 | 23.65 | 7.40 | 6.24 |
|   | 22.74 | 8.21 | 22.75 | 8.17 | 22.80 | 8.17 | 8.23 |
|   | 23.52 | 7.50 | 23.50 | 7.49 | 23.54 | 7.50 | 7.64 |
|   | 25.09 | 6.08 | 25.02 | 6.11 | 25.07 | 6.10 | 5.75 |
|   | 23.73 | 7.32 | 23.73 | 7.28 | 23.77 | 7.29 | 7.25 |
|   | 23.42 | 7.59 | 23.42 | 7.56 | 23.46 | 7.56 | 7.56 |
| 4 | 27.43 | 3.95 | 27.35 | 3.99 | 27.39 | 3.99 | 4.11 |
|   | 26.94 | 4.40 | 26.84 | 4.45 | 26.89 | 4.45 | 4.26 |
|   | 28.38 | 3.09 | 28.32 | 3.10 | 28.37 | 3.09 | 2.76 |
|   | 28.29 | 3.17 | 28.17 | 3.25 | 28.24 | 3.21 | 2.95 |
|   | 23.80 | 7.25 | 23.77 | 7.25 | 23.82 | 7.24 | 7.56 |
|   | 24.05 | 7.02 | 24.03 | 7.01 | 24.06 | 7.02 | 6.91 |
|   | 23.64 | 7.39 | 23.64 | 7.37 | 23.68 | 7.37 | 7.19 |
|   | 24.05 | 7.02 | 24.03 | 7.01 | 24.06 | 7.02 | 6.96 |
|   | 28.40 | 3.07 | 28.37 | 3.06 | 28.41 | 3.06 | 2.79 |
|   | 28.52 | 2.96 | 28.45 | 2.98 | 28.51 | 2.97 | 2.51 |
|   | 30.54 | 1.12 | 30.45 | 1.16 | 30.49 | 1.16 | 0.72 |
|   | 27.20 | 4.16 | 27.18 | 4.14 | 27.21 | 4.15 | 3.83 |
|   | 27.31 | 4.06 | 27.32 | 4.01 | 27.34 | 4.03 | 4.05 |
|   | 29.77 | 1.82 | 29.70 | 1.85 | 29.74 | 1.84 | 1.56 |
|   | 29.62 | 1.96 | 29.57 | 1.96 | 29.63 | 1.95 | 1.62 |
|   | 27.01 | 4.33 | 26.93 | 4.37 | 26.98 | 4.37 | 4.49 |
|   | 27.41 | 3.97 | 27.40 | 3.94 | 27.44 | 3.94 | 3.78 |
|   | 27.45 | 3.94 | 27.41 | 3.93 | 27.45 | 3.94 | 3.78 |
|   | 27.47 | 3.91 | 27.43 | 3.92 | 27.47 | 3.92 | 3.78 |
|   | 29.04 | 2.49 | 29.01 | 2.48 | 29.04 | 2.49 | 2.37 |
|   | 28.44 | 3.04 | 28.45 | 2.98 | 28.48 | 2.99 | 2.88 |
|   | 29.07 | 2.46 | 29.05 | 2.44 | 29.07 | 2.45 | 2.31 |
|   | 28.25 | 3.20 | 28.28 | 3.14 | 28.30 | 3.16 | 3.09 |
|   | 30.17 | 1.46 | 30.13 | 1.45 | 30.17 | 1.45 | 1.20 |

|  |       |      |       |      |       |      |      |
|--|-------|------|-------|------|-------|------|------|
|  | 28.35 | 3.12 | 28.30 | 3.12 | 28.35 | 3.11 | 2.74 |
|  | 24.19 | 6.90 | 24.13 | 6.92 | 24.17 | 6.92 | 6.65 |
|  | 24.97 | 6.18 | 24.93 | 6.19 | 24.98 | 6.18 | 5.85 |
|  | 24.85 | 6.29 | 24.78 | 6.33 | 24.83 | 6.32 | 6.22 |
|  | 29.39 | 2.17 | 29.38 | 2.14 | 29.42 | 2.14 | 1.95 |
|  | 29.38 | 2.18 | 29.36 | 2.16 | 29.38 | 2.17 | 1.99 |
|  | 27.77 | 3.64 | 27.74 | 3.63 | 27.76 | 3.65 | 3.54 |
|  | 29.05 | 2.48 | 28.93 | 2.55 | 28.98 | 2.54 | 2.28 |
|  | 30.49 | 1.17 | 30.40 | 1.21 | 30.43 | 1.21 | 1.07 |
|  | 29.34 | 2.21 | 29.30 | 2.21 | 29.32 | 2.23 | 1.90 |
|  | 26.92 | 4.41 | 26.89 | 4.41 | 26.92 | 4.42 | 4.01 |
|  | 27.17 | 4.19 | 27.16 | 4.16 | 27.19 | 4.17 | 4.23 |
|  | 28.40 | 3.07 | 28.30 | 3.12 | 28.35 | 3.11 | 2.07 |
|  | 29.43 | 2.13 | 29.36 | 2.16 | 29.40 | 2.16 | 2.59 |
|  | 28.60 | 2.88 | 28.50 | 2.94 | 28.54 | 2.94 | 2.80 |
|  | 30.02 | 1.60 | 29.95 | 1.62 | 29.98 | 1.63 | 1.49 |
|  | 29.14 | 2.40 | 29.07 | 2.42 | 29.10 | 2.43 | 2.15 |
|  | 27.54 | 3.85 | 27.53 | 3.82 | 27.56 | 3.84 | 3.71 |
|  | 27.56 | 3.83 | 27.53 | 3.83 | 27.57 | 3.83 | 3.83 |
|  | 27.55 | 3.84 | 27.51 | 3.84 | 27.54 | 3.85 | 3.82 |
|  | 27.28 | 4.09 | 27.17 | 4.15 | 27.23 | 4.14 | 3.92 |
|  | 23.47 | 7.55 | 23.36 | 7.62 | 23.42 | 7.60 | 7.68 |
|  | 23.60 | 7.43 | 23.58 | 7.42 | 23.63 | 7.42 | 7.26 |
|  | 23.80 | 7.25 | 23.78 | 7.24 | 23.82 | 7.24 | 7.11 |
|  | 23.56 | 7.47 | 23.55 | 7.44 | 23.60 | 7.45 | 7.33 |
|  | 24.09 | 6.98 | 24.06 | 6.98 | 24.10 | 6.98 | 7.02 |
|  | 27.87 | 3.55 | 27.82 | 3.56 | 27.84 | 3.58 | 3.46 |
|  | 28.52 | 2.96 | 28.42 | 3.01 | 28.48 | 2.99 | 2.36 |
|  | 28.86 | 2.65 | 28.81 | 2.66 | 28.84 | 2.66 | 2.66 |
|  | 27.48 | 3.90 | 27.48 | 3.87 | 27.50 | 3.88 | 3.75 |
|  | 27.47 | 3.91 | 27.46 | 3.88 | 27.49 | 3.90 | 3.75 |
|  | 29.79 | 1.80 | 29.75 | 1.81 | 29.79 | 1.80 | 1.43 |
|  | 29.74 | 1.85 | 29.71 | 1.84 | 29.73 | 1.85 | 1.60 |
|  | 26.94 | 4.40 | 26.85 | 4.44 | 26.90 | 4.43 | 4.29 |
|  | 27.73 | 3.68 | 27.69 | 3.68 | 27.72 | 3.69 | 3.69 |
|  | 27.52 | 3.87 | 27.47 | 3.88 | 27.51 | 3.88 | 3.69 |
|  | 27.56 | 3.83 | 27.55 | 3.81 | 27.59 | 3.81 | 3.69 |
|  | 29.01 | 2.51 | 28.99 | 2.50 | 29.01 | 2.51 | 2.37 |
|  | 28.43 | 3.04 | 28.45 | 2.99 | 28.47 | 3.00 | 2.88 |
|  | 29.05 | 2.48 | 29.03 | 2.46 | 29.06 | 2.47 | 2.31 |
|  | 28.25 | 3.21 | 28.27 | 3.15 | 28.29 | 3.17 | 3.09 |
|  | 30.18 | 1.45 | 30.15 | 1.44 | 30.19 | 1.44 | 1.21 |
|  | 28.38 | 3.09 | 28.33 | 3.09 | 28.38 | 3.08 | 2.75 |
|  | 23.86 | 7.19 | 23.83 | 7.19 | 23.87 | 7.19 | 6.83 |
|  | 24.52 | 6.59 | 24.47 | 6.61 | 24.51 | 6.61 | 6.35 |
|  | 24.63 | 6.50 | 24.54 | 6.55 | 24.59 | 6.54 | 6.41 |
|  | 29.36 | 2.20 | 29.35 | 2.16 | 29.38 | 2.17 | 1.95 |
|  | 29.32 | 2.24 | 29.31 | 2.20 | 29.34 | 2.21 | 1.99 |
|  | 27.74 | 3.67 | 27.71 | 3.66 | 27.74 | 3.67 | 3.51 |
|  | 29.23 | 2.32 | 29.12 | 2.38 | 29.20 | 2.34 | 1.99 |

|   |       |      |       |      |       |      |      |
|---|-------|------|-------|------|-------|------|------|
|   | 30.38 | 1.27 | 30.30 | 1.30 | 30.34 | 1.30 | 0.97 |
|   | 29.32 | 2.23 | 29.28 | 2.23 | 29.30 | 2.25 | 2.00 |
|   | 27.22 | 4.14 | 27.21 | 4.11 | 27.23 | 4.13 | 3.94 |
|   | 26.99 | 4.35 | 26.98 | 4.33 | 27.01 | 4.34 | 4.16 |
|   | 29.48 | 2.09 | 29.42 | 2.10 | 29.45 | 2.11 | 1.74 |
|   | 28.51 | 2.97 | 28.43 | 3.00 | 28.48 | 2.99 | 2.56 |
|   | 28.53 | 2.95 | 28.46 | 2.98 | 28.48 | 2.99 | 2.79 |
|   | 29.66 | 1.93 | 29.61 | 1.93 | 29.64 | 1.93 | 1.67 |
|   | 29.14 | 2.40 | 29.12 | 2.37 | 29.15 | 2.39 | 2.20 |
|   | 26.50 | 4.80 | 26.41 | 4.84 | 26.46 | 4.84 | 4.73 |
|   | 28.11 | 3.34 | 28.08 | 3.33 | 28.11 | 3.33 | 3.20 |
| 5 | 29.11 | 2.42 | 29.04 | 2.45 | 29.08 | 2.45 | 2.48 |
|   | 29.36 | 2.20 | 29.31 | 2.20 | 29.35 | 2.20 | 2.23 |
|   | 28.09 | 3.35 | 28.05 | 3.35 | 28.08 | 3.36 | 3.41 |
|   | 28.71 | 2.79 | 28.65 | 2.80 | 28.69 | 2.80 | 2.75 |
|   | 30.00 | 1.62 | 29.92 | 1.65 | 29.98 | 1.63 | 1.67 |
|   | 29.98 | 1.63 | 29.94 | 1.63 | 29.97 | 1.64 | 1.55 |
|   | 27.34 | 4.03 | 27.26 | 4.07 | 27.29 | 4.08 | 4.23 |
|   | 28.92 | 2.60 | 28.82 | 2.65 | 28.87 | 2.64 | 2.57 |
|   | 29.71 | 1.88 | 29.59 | 1.95 | 29.64 | 1.94 | 1.95 |
|   | 29.88 | 1.72 | 29.85 | 1.72 | 29.88 | 1.72 | 1.76 |
|   | 30.10 | 1.52 | 30.07 | 1.51 | 30.09 | 1.52 | 1.56 |
|   | 30.53 | 1.13 | 30.48 | 1.14 | 30.53 | 1.12 | 1.15 |
|   | 30.30 | 1.34 | 30.27 | 1.33 | 30.31 | 1.33 | 1.15 |
|   | 30.43 | 1.23 | 30.42 | 1.19 | 30.46 | 1.19 | 1.15 |
|   | 29.78 | 1.81 | 29.76 | 1.80 | 29.79 | 1.80 | 1.84 |
|   | 30.10 | 1.52 | 30.07 | 1.52 | 30.09 | 1.52 | 1.64 |
|   | 30.50 | 1.17 | 30.50 | 1.12 | 30.52 | 1.13 | 1.25 |
|   | 30.41 | 1.24 | 30.39 | 1.22 | 30.43 | 1.21 | 1.25 |
|   | 30.13 | 1.49 | 30.10 | 1.49 | 30.14 | 1.48 | 1.25 |
|   | 29.32 | 2.23 | 29.26 | 2.25 | 29.28 | 2.26 | 2.29 |
|   | 26.73 | 4.59 | 26.66 | 4.61 | 26.69 | 4.63 | 4.74 |
|   | 29.79 | 1.81 | 29.74 | 1.81 | 29.79 | 1.80 | 1.89 |
|   | 29.19 | 2.35 | 29.16 | 2.34 | 29.21 | 2.33 | 1.89 |
|   | 29.80 | 1.79 | 29.79 | 1.77 | 29.82 | 1.77 | 1.89 |
|   | 29.88 | 1.73 | 29.85 | 1.71 | 29.88 | 1.72 | 1.63 |
|   | 29.83 | 1.77 | 29.79 | 1.77 | 29.82 | 1.77 | 1.78 |
|   | 29.65 | 1.94 | 29.54 | 2.00 | 29.58 | 1.99 | 1.98 |
|   | 29.91 | 1.70 | 29.89 | 1.68 | 29.92 | 1.69 | 1.64 |
|   | 29.77 | 1.83 | 29.74 | 1.82 | 29.77 | 1.82 | 1.84 |
|   | 30.03 | 1.59 | 30.01 | 1.57 | 30.05 | 1.57 | 1.22 |
|   | 30.26 | 1.38 | 30.24 | 1.35 | 30.28 | 1.35 | 1.22 |
|   | 30.53 | 1.13 | 30.52 | 1.10 | 30.56 | 1.10 | 1.22 |
|   | 30.87 | 0.82 | 30.84 | 0.81 | 30.88 | 0.81 | 1.16 |
|   | 30.05 | 1.57 | 30.03 | 1.55 | 30.06 | 1.55 | 1.16 |
|   | 30.31 | 1.34 | 30.30 | 1.30 | 30.33 | 1.31 | 1.16 |
|   | 29.31 | 2.24 | 29.25 | 2.26 | 29.27 | 2.27 | 2.31 |
|   | 30.91 | 0.79 | 30.87 | 0.78 | 30.91 | 0.78 | 1.18 |
|   | 30.05 | 1.57 | 30.03 | 1.55 | 30.06 | 1.55 | 1.18 |
|   | 30.29 | 1.35 | 30.28 | 1.32 | 30.31 | 1.33 | 1.18 |



|   |       |      |       |      |       |      |      |
|---|-------|------|-------|------|-------|------|------|
| 6 | 23.19 | 7.80 | 23.18 | 7.78 | 23.22 | 7.79 | 7.82 |
|   | 23.53 | 7.50 | 23.53 | 7.46 | 23.57 | 7.47 | 7.55 |
|   | 22.78 | 8.18 | 22.76 | 8.17 | 22.80 | 8.17 | 8.27 |
|   | 23.37 | 7.64 | 23.35 | 7.63 | 23.40 | 7.62 | 7.67 |
|   | 26.27 | 5.01 | 26.23 | 5.01 | 26.26 | 5.02 | 4.56 |
|   | 24.86 | 6.29 | 24.77 | 6.34 | 24.83 | 6.32 | 7.58 |
|   | 24.10 | 6.98 | 24.06 | 6.99 | 24.10 | 6.99 | 7.69 |
|   | 23.80 | 7.25 | 23.79 | 7.23 | 23.82 | 7.24 | 7.66 |
|   | 23.62 | 7.42 | 23.53 | 7.46 | 23.60 | 7.44 | 7.96 |
|   | 28.06 | 3.38 | 28.03 | 3.37 | 28.06 | 3.38 | 2.58 |
|   | 28.24 | 3.22 | 28.19 | 3.23 | 28.23 | 3.22 | 2.71 |
|   | 26.56 | 4.74 | 26.52 | 4.74 | 26.54 | 4.76 | 5.49 |
|   | 24.45 | 6.66 | 24.43 | 6.64 | 24.47 | 6.64 | 7.23 |
|   | 24.55 | 6.57 | 24.54 | 6.55 | 24.58 | 6.55 | 7.09 |
|   | 24.06 | 7.01 | 24.02 | 7.02 | 24.06 | 7.02 | 7.27 |
|   | 24.34 | 6.76 | 24.28 | 6.78 | 24.32 | 6.78 | 7.48 |
|   | 27.95 | 3.48 | 27.90 | 3.48 | 27.92 | 3.51 | 4.25 |
|   | 29.48 | 2.09 | 29.42 | 2.10 | 29.46 | 2.11 | 1.73 |
|   | 30.02 | 1.60 | 29.98 | 1.59 | 30.01 | 1.60 | 1.51 |
|   | 30.24 | 1.40 | 30.09 | 1.49 | 30.14 | 1.48 | 1.84 |
|   | 30.26 | 1.38 | 30.26 | 1.34 | 30.29 | 1.34 | 0.95 |
|   | 30.28 | 1.36 | 30.26 | 1.34 | 30.29 | 1.35 | 0.95 |
|   | 30.64 | 1.04 | 30.64 | 0.99 | 30.67 | 1.00 | 0.95 |
|   | 30.03 | 1.59 | 30.01 | 1.56 | 30.05 | 1.56 | 0.90 |
|   | 30.94 | 0.76 | 30.93 | 0.73 | 30.96 | 0.73 | 0.90 |
|   | 30.23 | 1.41 | 30.18 | 1.41 | 30.22 | 1.41 | 0.90 |
| 7 | 25.20 | 5.98 | 25.14 | 6.00 | 25.18 | 6.00 | 6.17 |
|   | 27.21 | 4.15 | 27.12 | 4.20 | 27.18 | 4.17 | 4.49 |
|   | 27.64 | 3.76 | 27.61 | 3.75 | 27.65 | 3.75 | 3.09 |
|   | 23.55 | 7.48 | 23.49 | 7.50 | 23.54 | 7.50 | 7.34 |
|   | 23.61 | 7.42 | 23.59 | 7.41 | 23.64 | 7.41 | 7.22 |
|   | 27.06 | 4.29 | 26.99 | 4.32 | 27.03 | 4.32 | 4.72 |
|   | 26.75 | 4.57 | 26.69 | 4.58 | 26.73 | 4.59 | 4.72 |
|   | 24.39 | 6.71 | 24.36 | 6.71 | 24.40 | 6.71 | 6.75 |
|   | 29.01 | 2.52 | 28.96 | 2.52 | 29.00 | 2.52 | 2.93 |
|   | 27.49 | 3.90 | 27.43 | 3.92 | 27.47 | 3.91 | 2.93 |
|   | 29.35 | 2.20 | 29.33 | 2.19 | 29.37 | 2.18 | 2.93 |
|   | 27.54 | 3.86 | 27.45 | 3.90 | 27.50 | 3.89 | 2.62 |
|   | 27.82 | 3.60 | 27.73 | 3.64 | 27.79 | 3.62 | 2.62 |
|   | 24.39 | 6.71 | 24.37 | 6.70 | 24.41 | 6.70 | 6.90 |
|   | 23.22 | 7.78 | 23.20 | 7.77 | 23.24 | 7.77 | 7.29 |
|   | 23.90 | 7.16 | 23.88 | 7.14 | 23.92 | 7.15 | 7.23 |
|   | 22.83 | 8.14 | 22.83 | 8.10 | 22.87 | 8.10 | 7.64 |
|   | 23.78 | 7.27 | 23.78 | 7.24 | 23.82 | 7.24 | 7.19 |
|   | 23.87 | 7.18 | 23.89 | 7.13 | 23.93 | 7.14 | 7.19 |
|   | 28.86 | 2.65 | 28.82 | 2.65 | 28.86 | 2.64 | 3.14 |
|   | 27.32 | 4.05 | 27.25 | 4.07 | 27.31 | 4.06 | 3.14 |
|   | 28.93 | 2.59 | 28.91 | 2.57 | 28.95 | 2.57 | 3.14 |
|   | 27.45 | 3.93 | 27.41 | 3.93 | 27.46 | 3.93 | 4.72 |
|   | 26.93 | 4.41 | 26.89 | 4.41 | 26.91 | 4.42 | 4.72 |

|   |       |      |       |      |       |      |      |
|---|-------|------|-------|------|-------|------|------|
|   | 29.28 | 2.27 | 29.24 | 2.26 | 29.28 | 2.26 | 3.14 |
|   | 27.73 | 3.68 | 27.66 | 3.71 | 27.71 | 3.70 | 3.14 |
|   | 29.37 | 2.19 | 29.35 | 2.17 | 29.38 | 2.17 | 3.14 |
| 8 | 30.27 | 1.37 | 30.23 | 1.37 | 30.29 | 1.35 | 0.82 |
|   | 30.72 | 0.96 | 30.67 | 0.96 | 30.71 | 0.96 | 0.82 |
|   | 31.17 | 0.55 | 31.14 | 0.54 | 31.17 | 0.54 | 0.82 |
|   | 30.56 | 1.11 | 30.56 | 1.06 | 30.59 | 1.07 | 1.13 |
|   | 30.65 | 1.02 | 30.64 | 0.99 | 30.68 | 0.99 | 1.13 |
|   | 30.56 | 1.11 | 30.54 | 1.08 | 30.58 | 1.08 | 1.13 |
|   | 25.66 | 5.56 | 25.64 | 5.55 | 25.68 | 5.54 | 5.42 |
|   | 29.95 | 1.66 | 29.93 | 1.64 | 29.97 | 1.63 | 1.05 |
|   | 30.69 | 0.99 | 30.66 | 0.98 | 30.70 | 0.97 | 1.05 |
|   | 30.76 | 0.93 | 30.75 | 0.90 | 30.78 | 0.90 | 1.05 |
|   | 30.65 | 1.03 | 30.66 | 0.97 | 30.69 | 0.98 | 0.68 |
|   | 30.60 | 1.07 | 30.60 | 1.03 | 30.63 | 1.03 | 0.68 |
|   | 31.05 | 0.66 | 31.05 | 0.62 | 31.07 | 0.63 | 0.68 |
| 9 | 30.36 | 1.29 | 30.25 | 1.35 | 30.28 | 1.35 | 1.44 |
|   | 30.10 | 1.53 | 29.98 | 1.60 | 30.01 | 1.60 | 1.69 |
|   | 29.99 | 1.63 | 29.94 | 1.63 | 29.97 | 1.64 | 1.69 |
|   | 29.81 | 1.79 | 29.75 | 1.80 | 29.79 | 1.80 | 1.59 |
|   | 30.06 | 1.56 | 30.01 | 1.57 | 30.05 | 1.56 | 1.52 |
|   | 30.56 | 1.10 | 30.53 | 1.09 | 30.56 | 1.10 | 1.52 |
|   | 27.89 | 3.54 | 27.81 | 3.57 | 27.84 | 3.58 | 3.64 |
|   | 30.17 | 1.46 | 30.13 | 1.46 | 30.15 | 1.47 | 2.21 |
|   | 29.19 | 2.36 | 29.12 | 2.38 | 29.16 | 2.38 | 1.52 |
|   | 29.67 | 1.92 | 29.59 | 1.95 | 29.62 | 1.96 | 1.77 |
|   | 29.86 | 1.74 | 29.83 | 1.73 | 29.86 | 1.74 | 1.52 |
|   | 30.18 | 1.45 | 30.14 | 1.44 | 30.17 | 1.45 | 1.52 |
|   | 30.30 | 1.34 | 30.27 | 1.33 | 30.30 | 1.34 | 1.98 |
|   | 28.98 | 2.55 | 28.93 | 2.55 | 28.97 | 2.55 | 1.28 |
|   | 29.90 | 1.71 | 29.85 | 1.71 | 29.88 | 1.72 | 1.31 |
|   | 29.59 | 1.99 | 29.52 | 2.02 | 29.56 | 2.01 | 1.77 |
|   | 30.44 | 1.22 | 30.41 | 1.21 | 30.43 | 1.21 | 1.48 |
|   | 30.35 | 1.29 | 30.26 | 1.34 | 30.30 | 1.33 | 1.49 |
|   | 30.15 | 1.48 | 30.12 | 1.47 | 30.15 | 1.47 | 1.81 |
|   | 29.81 | 1.79 | 29.77 | 1.79 | 29.80 | 1.79 | 1.28 |
|   | 28.51 | 2.97 | 28.44 | 3.00 | 28.49 | 2.99 | 3.10 |
|   | 29.92 | 1.69 | 29.89 | 1.68 | 29.91 | 1.69 | 1.74 |
|   | 27.16 | 4.19 | 27.09 | 4.23 | 27.12 | 4.23 | 4.43 |
|   | 27.38 | 3.99 | 27.29 | 4.04 | 27.32 | 4.05 | 4.26 |
|   | 30.44 | 1.22 | 30.40 | 1.21 | 30.44 | 1.20 | 1.21 |
|   | 30.18 | 1.46 | 30.16 | 1.43 | 30.19 | 1.43 | 1.21 |
|   | 30.60 | 1.07 | 30.60 | 1.03 | 30.64 | 1.03 | 1.21 |
|   | 30.81 | 0.88 | 30.77 | 0.87 | 30.81 | 0.87 | 0.88 |
|   | 30.84 | 0.86 | 30.79 | 0.86 | 30.83 | 0.86 | 0.88 |
|   | 30.67 | 1.01 | 30.61 | 1.02 | 30.66 | 1.01 | 0.88 |
|   | 30.71 | 0.97 | 30.65 | 0.99 | 30.70 | 0.97 | 0.95 |
|   | 30.47 | 1.18 | 30.43 | 1.19 | 30.47 | 1.18 | 0.95 |
|   | 30.69 | 0.99 | 30.65 | 0.98 | 30.71 | 0.96 | 0.95 |
|   | 30.37 | 1.28 | 30.34 | 1.27 | 30.37 | 1.27 | 1.13 |

|           |       |       |       |       |       |       |      |
|-----------|-------|-------|-------|-------|-------|-------|------|
|           | 31.03 | 0.68  | 31.01 | 0.66  | 31.05 | 0.66  | 1.13 |
|           | 30.18 | 1.45  | 30.12 | 1.47  | 30.17 | 1.45  | 1.13 |
|           | 30.89 | 0.80  | 30.88 | 0.78  | 30.91 | 0.78  | 1.22 |
|           | 30.68 | 1.00  | 30.68 | 0.95  | 30.71 | 0.97  | 1.22 |
|           | 29.39 | 2.17  | 29.34 | 2.18  | 29.39 | 2.17  | 1.22 |
|           | 29.60 | 1.98  | 29.56 | 1.98  | 29.61 | 1.97  | 0.99 |
|           | 30.96 | 0.74  | 30.95 | 0.71  | 30.97 | 0.72  | 0.99 |
|           | 30.76 | 0.92  | 30.76 | 0.89  | 30.78 | 0.90  | 0.99 |
|           | 30.46 | 1.20  | 30.46 | 1.16  | 30.48 | 1.17  | 0.96 |
|           | 31.03 | 0.68  | 31.02 | 0.65  | 31.05 | 0.65  | 0.96 |
|           | 30.35 | 1.30  | 30.31 | 1.29  | 30.36 | 1.28  | 0.96 |
| <b>10</b> | 25.73 | 5.50  | 25.61 | 5.57  | 25.66 | 5.57  | 5.63 |
|           | 28.02 | 3.42  | 27.94 | 3.45  | 28.00 | 3.44  | 3.43 |
|           | 28.42 | 3.05  | 28.38 | 3.05  | 28.42 | 3.05  | 3.17 |
|           | 29.13 | 2.41  | 29.04 | 2.45  | 29.08 | 2.44  | 2.23 |
|           | 30.13 | 1.50  | 30.13 | 1.46  | 30.15 | 1.47  | 1.32 |
|           | 30.14 | 1.49  | 30.10 | 1.48  | 30.13 | 1.49  | 1.10 |
|           | 25.99 | 5.26  | 25.90 | 5.31  | 25.96 | 5.29  | 5.25 |
|           | 26.50 | 4.80  | 26.42 | 4.83  | 26.47 | 4.83  | 4.64 |
|           | 29.01 | 2.52  | 28.94 | 2.54  | 28.96 | 2.55  | 2.51 |
|           | 29.26 | 2.29  | 29.19 | 2.31  | 29.23 | 2.31  | 1.90 |
|           | 28.86 | 2.65  | 28.79 | 2.68  | 28.83 | 2.68  | 2.37 |
|           | 27.33 | 4.04  | 27.21 | 4.12  | 27.27 | 4.10  | 4.77 |
|           | 26.22 | 5.05  | 26.16 | 5.07  | 26.22 | 5.05  | 4.79 |
|           | 28.83 | 2.68  | 28.75 | 2.71  | 28.79 | 2.71  | 2.67 |
|           | 29.21 | 2.33  | 29.14 | 2.36  | 29.18 | 2.36  | 2.61 |
|           | 30.69 | 0.99  | 30.68 | 0.95  | 30.71 | 0.96  | 0.83 |
|           | 30.55 | 1.11  | 30.56 | 1.06  | 30.59 | 1.07  | 0.83 |
|           | 30.67 | 1.00  | 30.68 | 0.96  | 30.71 | 0.96  | 0.83 |
|           | 28.87 | 2.65  | 28.79 | 2.68  | 28.84 | 2.66  | 2.97 |
|           | 29.65 | 1.93  | 29.58 | 1.96  | 29.63 | 1.95  | 2.97 |
|           | 29.14 | 2.40  | 29.07 | 2.42  | 29.12 | 2.41  | 2.97 |
|           | 30.63 | 1.05  | 30.62 | 1.01  | 30.66 | 1.01  | 1.06 |
|           | 30.21 | 1.42  | 30.21 | 1.38  | 30.25 | 1.38  | 1.06 |
|           | 30.72 | 0.96  | 30.71 | 0.93  | 30.74 | 0.93  | 1.06 |
|           | 30.75 | 0.93  | 30.73 | 0.91  | 30.76 | 0.91  | 1.15 |
|           | 30.28 | 1.36  | 30.24 | 1.36  | 30.28 | 1.35  | 1.15 |
|           | 31.13 | 0.59  | 31.12 | 0.56  | 31.15 | 0.56  | 1.15 |
|           | 31.20 | 0.52  | 31.16 | 0.52  | 31.21 | 0.51  | 1.04 |
|           | 31.78 | 0.00  | 31.73 | 0.00  | 31.77 | 0.00  | 1.04 |
|           | 32.92 | -1.04 | 32.80 | -0.98 | 32.85 | -0.98 | 1.04 |
|           | 30.05 | 1.57  | 29.98 | 1.59  | 30.04 | 1.58  | 1.59 |
|           | 29.97 | 1.64  | 29.87 | 1.69  | 29.94 | 1.66  | 1.59 |
|           | 30.83 | 0.86  | 30.74 | 0.90  | 30.80 | 0.88  | 1.59 |
|           | 23.68 | 7.36  | 23.65 | 7.35  | 23.71 | 7.35  | 7.61 |
|           | 23.77 | 7.28  | 23.74 | 7.28  | 23.77 | 7.28  | 7.35 |
|           | 23.84 | 7.21  | 23.82 | 7.20  | 23.88 | 7.19  | 6.90 |
|           | 23.77 | 7.28  | 23.73 | 7.28  | 23.79 | 7.27  | 6.90 |
|           | 24.11 | 6.97  | 24.10 | 6.94  | 24.14 | 6.95  | 7.11 |
|           | 24.00 | 7.07  | 23.96 | 7.07  | 24.01 | 7.07  | 7.18 |

|           |       |      |       |      |       |      |      |
|-----------|-------|------|-------|------|-------|------|------|
|           | 24.32 | 6.78 | 24.31 | 6.75 | 24.35 | 6.76 | 6.69 |
|           | 24.25 | 6.84 | 24.23 | 6.83 | 24.28 | 6.83 | 6.69 |
| <b>11</b> | 27.40 | 3.98 | 27.39 | 3.95 | 27.42 | 3.96 | 3.78 |
|           | 28.96 | 2.56 | 28.91 | 2.57 | 28.95 | 2.56 | 2.97 |
|           | 28.57 | 2.91 | 28.55 | 2.90 | 28.59 | 2.89 | 2.77 |
|           | 24.74 | 6.40 | 24.68 | 6.42 | 24.72 | 6.42 | 6.45 |
|           | 23.51 | 7.51 | 23.48 | 7.51 | 23.54 | 7.50 | 7.35 |
|           | 24.15 | 6.94 | 24.10 | 6.94 | 24.17 | 6.92 | 6.97 |
|           | 24.23 | 6.86 | 24.19 | 6.87 | 24.24 | 6.85 | 6.84 |
|           | 23.71 | 7.33 | 23.70 | 7.31 | 23.75 | 7.30 | 7.30 |
|           | 24.48 | 6.64 | 24.41 | 6.66 | 24.47 | 6.65 | 6.73 |
|           | 24.37 | 6.73 | 24.35 | 6.72 | 24.40 | 6.71 | 6.84 |
|           | 24.97 | 6.19 | 24.92 | 6.20 | 24.96 | 6.20 | 6.44 |
|           | 29.76 | 1.84 | 29.69 | 1.85 | 29.73 | 1.86 | 2.10 |
|           | 29.13 | 2.40 | 29.07 | 2.42 | 29.11 | 2.42 | 2.75 |
|           | 28.51 | 2.97 | 28.47 | 2.96 | 28.51 | 2.96 | 3.65 |
|           | 27.36 | 4.02 | 27.29 | 4.04 | 27.32 | 4.05 | 4.76 |
|           | 30.87 | 0.82 | 30.86 | 0.79 | 30.89 | 0.80 | 1.45 |
|           | 30.53 | 1.13 | 30.49 | 1.13 | 30.53 | 1.13 | 1.45 |
|           | 30.44 | 1.21 | 30.45 | 1.16 | 30.48 | 1.17 | 1.45 |
|           | 28.63 | 2.86 | 28.62 | 2.83 | 28.65 | 2.84 | 2.44 |
|           | 29.39 | 2.17 | 29.32 | 2.20 | 29.37 | 2.19 | 2.44 |
|           | 29.57 | 2.00 | 29.53 | 2.00 | 29.58 | 1.99 | 2.44 |
|           | 28.71 | 2.78 | 28.65 | 2.81 | 28.69 | 2.80 | 3.28 |
|           | 27.99 | 3.44 | 27.96 | 3.43 | 28.01 | 3.42 | 3.28 |
|           | 29.14 | 2.39 | 29.07 | 2.43 | 29.12 | 2.41 | 3.28 |
|           | 29.42 | 2.14 | 29.39 | 2.13 | 29.43 | 2.12 | 2.38 |
|           | 28.86 | 2.65 | 28.86 | 2.61 | 28.90 | 2.61 | 2.38 |
|           | 28.82 | 2.69 | 28.81 | 2.66 | 28.86 | 2.65 | 2.38 |
|           | 27.43 | 3.95 | 27.41 | 3.93 | 27.46 | 3.93 | 4.09 |
|           | 27.50 | 3.89 | 27.48 | 3.87 | 27.52 | 3.87 | 4.09 |
|           | 26.99 | 4.35 | 27.00 | 4.31 | 27.04 | 4.31 | 4.09 |
|           | 27.16 | 4.20 | 27.17 | 4.16 | 27.21 | 4.15 | 4.08 |
|           | 27.63 | 3.77 | 27.61 | 3.75 | 27.66 | 3.75 | 4.08 |
|           | 27.71 | 3.70 | 27.69 | 3.67 | 27.73 | 3.68 | 4.08 |
|           | 28.89 | 2.62 | 28.88 | 2.59 | 28.93 | 2.58 | 2.33 |
|           | 29.51 | 2.06 | 29.48 | 2.05 | 29.52 | 2.04 | 2.33 |
|           | 28.88 | 2.64 | 28.87 | 2.60 | 28.91 | 2.60 | 2.33 |
|           | 30.24 | 1.40 | 30.22 | 1.37 | 30.26 | 1.37 | 1.62 |
|           | 30.19 | 1.45 | 30.13 | 1.46 | 30.18 | 1.45 | 1.62 |
|           | 30.04 | 1.58 | 30.02 | 1.56 | 30.06 | 1.55 | 1.62 |
|           | 31.09 | 0.63 | 31.07 | 0.60 | 31.11 | 0.60 | 1.10 |
|           | 30.45 | 1.21 | 30.45 | 1.17 | 30.48 | 1.17 | 1.10 |
|           | 30.69 | 0.99 | 30.67 | 0.97 | 30.69 | 0.98 | 1.10 |
| <b>12</b> | 29.11 | 2.43 | 28.96 | 2.52 | 29.01 | 2.51 | 2.56 |
|           | 28.12 | 3.32 | 28.03 | 3.37 | 28.07 | 3.36 | 4.04 |
|           | 29.33 | 2.22 | 29.21 | 2.29 | 29.26 | 2.29 | 2.23 |
|           | 29.18 | 2.36 | 29.08 | 2.41 | 29.13 | 2.41 | 2.47 |
|           | 28.46 | 3.01 | 28.39 | 3.04 | 28.42 | 3.05 | 2.85 |
|           | 30.22 | 1.42 | 30.16 | 1.43 | 30.20 | 1.43 | 1.07 |

|           |       |      |       |      |       |      |      |
|-----------|-------|------|-------|------|-------|------|------|
|           | 30.71 | 0.97 | 30.64 | 0.99 | 30.69 | 0.98 | 1.07 |
|           | 31.06 | 0.65 | 30.98 | 0.69 | 31.02 | 0.68 | 1.07 |
|           | 26.62 | 4.69 | 26.55 | 4.72 | 26.58 | 4.72 | 4.76 |
|           | 27.10 | 4.25 | 27.04 | 4.27 | 27.08 | 4.27 | 4.46 |
|           | 30.62 | 1.06 | 30.59 | 1.04 | 30.62 | 1.05 | 1.17 |
|           | 30.19 | 1.44 | 30.15 | 1.44 | 30.19 | 1.44 | 1.17 |
|           | 30.43 | 1.22 | 30.35 | 1.26 | 30.40 | 1.24 | 1.17 |
|           | 28.74 | 2.76 | 28.67 | 2.78 | 28.71 | 2.79 | 2.98 |
|           | 28.88 | 2.64 | 28.82 | 2.65 | 28.84 | 2.66 | 2.68 |
|           | 29.95 | 1.66 | 29.93 | 1.64 | 29.98 | 1.62 | 1.18 |
|           | 30.50 | 1.16 | 30.48 | 1.14 | 30.52 | 1.14 | 1.18 |
|           | 30.83 | 0.86 | 30.80 | 0.85 | 30.83 | 0.85 | 1.18 |
|           | 30.69 | 0.99 | 30.68 | 0.95 | 30.71 | 0.96 | 1.29 |
|           | 30.24 | 1.40 | 30.22 | 1.38 | 30.25 | 1.38 | 1.29 |
|           | 30.20 | 1.44 | 30.18 | 1.41 | 30.21 | 1.42 | 1.29 |
|           | 24.64 | 6.49 | 24.62 | 6.47 | 24.67 | 6.47 | 6.34 |
|           | 23.89 | 7.17 | 23.85 | 7.17 | 23.89 | 7.17 | 7.41 |
|           | 23.81 | 7.24 | 23.81 | 7.21 | 23.84 | 7.22 | 7.40 |
| <b>13</b> | 27.63 | 3.77 | 27.60 | 3.76 | 27.63 | 3.77 | 4.11 |
|           | 28.55 | 2.93 | 28.49 | 2.95 | 28.52 | 2.96 | 1.84 |
|           | 28.10 | 3.34 | 28.08 | 3.33 | 28.11 | 3.33 | 3.14 |
|           | 28.14 | 3.31 | 28.05 | 3.35 | 28.10 | 3.34 | 2.98 |
|           | 29.58 | 2.00 | 29.58 | 1.96 | 29.61 | 1.97 | 2.16 |
|           | 28.72 | 2.78 | 28.67 | 2.78 | 28.72 | 2.77 | 2.16 |
|           | 29.35 | 2.20 | 29.30 | 2.21 | 29.34 | 2.21 | 2.48 |
|           | 29.71 | 1.88 | 29.67 | 1.88 | 29.72 | 1.86 | 2.48 |
|           | 28.09 | 3.35 | 28.10 | 3.31 | 28.12 | 3.33 | 3.12 |
|           | 28.49 | 2.99 | 28.47 | 2.96 | 28.51 | 2.96 | 3.12 |
|           | 27.62 | 3.78 | 27.61 | 3.75 | 27.64 | 3.76 | 3.55 |
|           | 28.70 | 2.80 | 28.65 | 2.81 | 28.68 | 2.81 | 3.55 |
|           | 23.92 | 7.14 | 23.91 | 7.12 | 23.95 | 7.12 | 7.14 |
|           | 24.23 | 6.86 | 24.18 | 6.87 | 24.22 | 6.87 | 6.20 |
|           | 25.77 | 5.46 | 25.74 | 5.46 | 25.78 | 5.45 | 5.35 |
|           | 24.34 | 6.76 | 24.34 | 6.73 | 24.37 | 6.74 | 6.66 |
|           | 24.09 | 6.99 | 24.08 | 6.96 | 24.12 | 6.97 | 7.12 |
|           | 29.32 | 2.24 | 29.23 | 2.28 | 29.29 | 2.26 | 1.83 |
|           | 29.77 | 1.82 | 29.77 | 1.78 | 29.81 | 1.78 | 1.83 |
|           | 29.70 | 1.89 | 29.67 | 1.87 | 29.71 | 1.87 | 1.83 |
|           | 26.03 | 5.22 | 26.00 | 5.22 | 26.03 | 5.23 | 5.30 |
|           | 29.35 | 2.20 | 29.30 | 2.21 | 29.34 | 2.21 | 2.48 |
|           | 29.71 | 1.88 | 29.67 | 1.88 | 29.72 | 1.86 | 2.48 |
|           | 28.09 | 3.35 | 28.10 | 3.31 | 28.12 | 3.33 | 2.90 |
|           | 28.49 | 2.99 | 28.47 | 2.96 | 28.51 | 2.96 | 2.90 |
|           | 27.62 | 3.78 | 27.61 | 3.75 | 27.64 | 3.76 | 3.13 |
|           | 28.70 | 2.80 | 28.65 | 2.81 | 28.68 | 2.81 | 3.13 |
| <b>14</b> | 28.74 | 2.76 | 28.64 | 2.82 | 28.68 | 2.81 | 2.99 |
|           | 28.37 | 3.09 | 28.29 | 3.13 | 28.34 | 3.12 | 3.36 |
|           | 27.55 | 3.85 | 27.47 | 3.88 | 27.50 | 3.89 | 3.50 |
|           | 28.62 | 2.87 | 28.59 | 2.86 | 28.63 | 2.85 | 2.72 |
|           | 29.39 | 2.17 | 29.37 | 2.15 | 29.40 | 2.15 | 2.04 |

|    |       |      |       |      |       |      |      |
|----|-------|------|-------|------|-------|------|------|
|    | 25.02 | 6.14 | 24.97 | 6.16 | 25.01 | 6.15 | 6.38 |
|    | 23.84 | 7.21 | 23.83 | 7.19 | 23.88 | 7.19 | 7.14 |
|    | 29.50 | 2.07 | 29.50 | 2.03 | 29.54 | 2.03 | 1.78 |
|    | 29.57 | 2.01 | 29.54 | 1.99 | 29.59 | 1.98 | 1.78 |
|    | 29.64 | 1.94 | 29.63 | 1.91 | 29.67 | 1.91 | 1.78 |
|    | 24.20 | 6.88 | 24.15 | 6.90 | 24.20 | 6.90 | 6.94 |
|    | 24.76 | 6.38 | 24.74 | 6.36 | 24.79 | 6.36 | 6.42 |
|    | 23.65 | 7.39 | 23.60 | 7.40 | 23.65 | 7.39 | 7.24 |
|    | 24.14 | 6.94 | 24.08 | 6.96 | 24.13 | 6.96 | 6.98 |
|    | 24.76 | 6.38 | 24.74 | 6.37 | 24.77 | 6.37 | 6.51 |
|    | 25.33 | 5.86 | 25.25 | 5.89 | 25.30 | 5.89 | 6.23 |
|    | 24.81 | 6.34 | 24.77 | 6.33 | 24.81 | 6.34 | 6.46 |
|    | 24.13 | 6.95 | 24.12 | 6.93 | 24.16 | 6.93 | 7.05 |
|    | 23.64 | 7.39 | 23.65 | 7.36 | 23.69 | 7.36 | 7.41 |
|    | 24.32 | 6.77 | 24.29 | 6.78 | 24.33 | 6.78 | 6.97 |
| 15 | 24.28 | 6.82 | 24.28 | 6.78 | 24.33 | 6.78 | 6.81 |
|    | 28.72 | 2.78 | 28.62 | 2.83 | 28.66 | 2.83 | 2.23 |
|    | 26.71 | 4.61 | 26.66 | 4.62 | 26.68 | 4.63 | 5.41 |
|    | 27.57 | 3.82 | 27.46 | 3.89 | 27.49 | 3.89 | 3.58 |
|    | 26.06 | 5.20 | 25.97 | 5.25 | 26.01 | 5.25 | 5.68 |
|    | 30.29 | 1.35 | 30.23 | 1.37 | 30.27 | 1.36 | 1.02 |
|    | 30.70 | 0.98 | 30.67 | 0.97 | 30.70 | 0.97 | 1.02 |
|    | 30.30 | 1.34 | 30.28 | 1.32 | 30.32 | 1.32 | 1.02 |
|    | 23.30 | 7.70 | 23.27 | 7.70 | 23.32 | 7.70 | 8.01 |
|    | 23.55 | 7.48 | 23.53 | 7.47 | 23.57 | 7.47 | 7.42 |
|    | 23.57 | 7.46 | 23.54 | 7.45 | 23.58 | 7.46 | 7.54 |
|    | 23.92 | 7.14 | 23.89 | 7.14 | 23.93 | 7.14 | 7.42 |
|    | 23.82 | 7.23 | 23.75 | 7.26 | 23.81 | 7.25 | 8.01 |
|    | 25.56 | 5.65 | 25.46 | 5.71 | 25.50 | 5.71 | 6.36 |
|    | 29.54 | 2.04 | 29.49 | 2.04 | 29.54 | 2.03 | 1.68 |
|    | 29.74 | 1.85 | 29.70 | 1.85 | 29.75 | 1.84 | 1.68 |
|    | 29.88 | 1.73 | 29.86 | 1.71 | 29.90 | 1.70 | 1.68 |
|    | 25.27 | 5.91 | 25.21 | 5.94 | 25.27 | 5.92 | 5.39 |
|    | 29.69 | 1.90 | 29.60 | 1.94 | 29.63 | 1.94 | 1.99 |
|    | 29.08 | 2.45 | 28.98 | 2.50 | 29.04 | 2.49 | 2.37 |
|    | 26.98 | 4.36 | 26.87 | 4.43 | 26.90 | 4.43 | 5.48 |
|    | 29.84 | 1.76 | 29.80 | 1.76 | 29.83 | 1.76 | 0.97 |
|    | 30.71 | 0.97 | 30.67 | 0.97 | 30.70 | 0.97 | 0.97 |
|    | 30.94 | 0.76 | 30.92 | 0.74 | 30.95 | 0.74 | 0.97 |
|    | 30.56 | 1.11 | 30.54 | 1.08 | 30.57 | 1.09 | 1.02 |
|    | 30.65 | 1.02 | 30.63 | 1.00 | 30.66 | 1.01 | 1.02 |
|    | 30.38 | 1.27 | 30.35 | 1.26 | 30.38 | 1.26 | 1.02 |
|    | 26.49 | 4.80 | 26.37 | 4.88 | 26.41 | 4.88 | 5.39 |
|    | 24.35 | 6.75 | 24.33 | 6.74 | 24.38 | 6.73 | 6.75 |
|    | 28.68 | 2.81 | 28.63 | 2.82 | 28.68 | 2.81 | 1.73 |
|    | 29.57 | 2.01 | 29.52 | 2.02 | 29.57 | 2.00 | 1.73 |
|    | 29.63 | 1.95 | 29.58 | 1.95 | 29.63 | 1.94 | 1.73 |
|    | 29.59 | 1.99 | 29.54 | 2.00 | 29.59 | 1.98 | 2.05 |
|    | 28.84 | 2.67 | 28.74 | 2.72 | 28.79 | 2.71 | 2.05 |
|    | 29.68 | 1.90 | 29.59 | 1.95 | 29.64 | 1.93 | 2.05 |

|    |       |      |       |      |       |      |      |
|----|-------|------|-------|------|-------|------|------|
|    | 29.62 | 1.96 | 29.59 | 1.94 | 29.64 | 1.94 | 2.27 |
|    | 29.04 | 2.48 | 29.01 | 2.48 | 29.05 | 2.48 | 2.27 |
|    | 29.20 | 2.34 | 29.14 | 2.36 | 29.18 | 2.36 | 2.27 |
|    | 28.97 | 2.55 | 28.92 | 2.56 | 28.97 | 2.55 | 2.18 |
|    | 29.58 | 2.00 | 29.48 | 2.05 | 29.54 | 2.03 | 2.18 |
|    | 29.81 | 1.78 | 29.77 | 1.78 | 29.82 | 1.77 | 2.18 |
|    | 29.41 | 2.15 | 29.36 | 2.16 | 29.41 | 2.14 | 2.02 |
|    | 28.89 | 2.63 | 28.82 | 2.65 | 28.87 | 2.64 | 2.02 |
|    | 29.34 | 2.22 | 29.27 | 2.24 | 29.31 | 2.24 | 2.02 |
|    | 29.37 | 2.19 | 29.30 | 2.21 | 29.35 | 2.20 | 2.00 |
|    | 29.28 | 2.27 | 29.18 | 2.33 | 29.23 | 2.31 | 2.00 |
| 16 | 29.19 | 2.35 | 29.14 | 2.36 | 29.18 | 2.36 | 2.00 |
|    | 27.67 | 3.73 | 27.66 | 3.70 | 27.69 | 3.72 | 3.75 |
|    | 25.76 | 5.47 | 25.70 | 5.49 | 25.76 | 5.48 | 5.21 |
|    | 26.23 | 5.04 | 26.15 | 5.08 | 26.20 | 5.07 | 5.04 |
|    | 26.72 | 4.60 | 26.68 | 4.60 | 26.72 | 4.60 | 4.57 |
|    | 26.21 | 5.06 | 26.14 | 5.09 | 26.17 | 5.10 | 5.03 |
|    | 25.76 | 5.47 | 25.69 | 5.50 | 25.74 | 5.49 | 5.44 |
|    | 24.33 | 6.77 | 24.27 | 6.79 | 24.33 | 6.78 | 6.62 |
|    | 24.80 | 6.34 | 24.73 | 6.38 | 24.78 | 6.36 | 6.30 |
| 17 | 24.43 | 6.68 | 24.38 | 6.69 | 24.43 | 6.68 | 6.58 |
|    | 24.46 | 6.65 | 24.39 | 6.68 | 24.45 | 6.67 | 6.49 |
|    | 29.70 | 1.89 | 29.64 | 1.90 | 29.68 | 1.90 | 1.77 |
|    | 27.65 | 3.75 | 27.64 | 3.73 | 27.65 | 3.75 | 3.46 |
|    | 28.09 | 3.35 | 28.03 | 3.36 | 28.06 | 3.38 | 3.39 |
|    | 25.76 | 5.47 | 25.72 | 5.48 | 25.74 | 5.49 | 5.59 |
|    | 27.92 | 3.51 | 27.87 | 3.51 | 27.90 | 3.53 | 4.08 |
|    | 27.78 | 3.63 | 27.72 | 3.65 | 27.76 | 3.65 | 3.62 |
|    | 26.94 | 4.40 | 26.87 | 4.42 | 26.91 | 4.43 | 4.18 |
|    | 27.86 | 3.56 | 27.82 | 3.56 | 27.84 | 3.57 | 2.76 |
|    | 28.11 | 3.33 | 28.07 | 3.33 | 28.10 | 3.34 | 3.25 |
|    | 27.94 | 3.48 | 27.92 | 3.47 | 27.94 | 3.48 | 3.23 |
|    | 28.23 | 3.22 | 28.19 | 3.22 | 28.21 | 3.24 | 3.11 |
|    | 28.30 | 3.16 | 28.24 | 3.18 | 28.27 | 3.19 | 2.94 |
|    | 29.46 | 2.11 | 29.43 | 2.10 | 29.46 | 2.10 | 2.04 |
|    | 27.52 | 3.87 | 27.48 | 3.87 | 27.50 | 3.88 | 3.93 |
|    | 27.22 | 4.14 | 27.18 | 4.14 | 27.21 | 4.15 | 4.29 |
|    | 29.33 | 2.23 | 29.28 | 2.23 | 29.32 | 2.23 | 2.36 |
|    | 29.35 | 2.21 | 29.32 | 2.20 | 29.34 | 2.21 | 1.90 |
|    | 28.62 | 2.87 | 28.57 | 2.88 | 28.61 | 2.87 | 2.28 |
|    | 29.71 | 1.88 | 29.68 | 1.86 | 29.72 | 1.86 | 2.01 |
|    | 26.34 | 4.94 | 26.27 | 4.97 | 26.32 | 4.96 | 5.36 |
|    | 29.12 | 2.41 | 29.08 | 2.41 | 29.11 | 2.42 | 2.18 |
|    | 27.29 | 4.07 | 27.29 | 4.04 | 27.32 | 4.05 | 4.03 |
|    | 27.66 | 3.74 | 27.65 | 3.72 | 27.67 | 3.73 | 3.58 |
|    | 30.56 | 1.11 | 30.56 | 1.07 | 30.58 | 1.08 | 0.89 |
|    | 29.74 | 1.85 | 29.71 | 1.84 | 29.75 | 1.84 | 0.89 |
|    | 30.01 | 1.61 | 30.00 | 1.57 | 30.04 | 1.58 | 0.89 |
|    | 22.83 | 8.13 | 22.77 | 8.16 | 22.82 | 8.15 | 8.16 |
|    | 23.50 | 7.52 | 23.49 | 7.50 | 23.53 | 7.50 | 7.57 |

|           |       |      |       |      |       |      |      |
|-----------|-------|------|-------|------|-------|------|------|
|           | 23.38 | 7.64 | 23.36 | 7.62 | 23.41 | 7.61 | 7.66 |
|           | 23.54 | 7.49 | 23.53 | 7.47 | 23.57 | 7.47 | 7.57 |
|           | 22.80 | 8.15 | 22.78 | 8.15 | 22.82 | 8.15 | 8.16 |
|           | 27.27 | 4.09 | 27.25 | 4.08 | 27.28 | 4.09 | 3.62 |
|           | 27.73 | 3.68 | 27.72 | 3.66 | 27.74 | 3.67 | 3.56 |
|           | 27.60 | 3.80 | 27.59 | 3.77 | 27.62 | 3.78 | 3.75 |
|           | 27.36 | 4.01 | 27.35 | 3.99 | 27.38 | 4.00 | 3.89 |
| <b>18</b> | 24.08 | 6.99 | 24.07 | 6.97 | 24.11 | 6.97 | 6.62 |
|           | 29.23 | 2.31 | 29.20 | 2.31 | 29.23 | 2.31 | 1.98 |
|           | 27.76 | 3.65 | 27.74 | 3.63 | 27.77 | 3.64 | 3.11 |
|           | 25.14 | 6.03 | 25.11 | 6.02 | 25.15 | 6.03 | 5.70 |
|           | 27.68 | 3.72 | 27.64 | 3.72 | 27.66 | 3.74 | 3.49 |
|           | 28.92 | 2.59 | 28.86 | 2.61 | 28.89 | 2.62 | 2.20 |
|           | 28.36 | 3.11 | 28.21 | 3.21 | 28.26 | 3.20 | 3.11 |
|           | 29.24 | 2.31 | 29.13 | 2.37 | 29.17 | 2.36 | 2.77 |
|           | 29.24 | 2.31 | 29.17 | 2.33 | 29.21 | 2.33 | 2.11 |
|           | 30.01 | 1.60 | 29.94 | 1.63 | 30.00 | 1.61 | 0.94 |
|           | 28.55 | 2.93 | 28.46 | 2.98 | 28.49 | 2.99 | 2.87 |
|           | 27.29 | 4.08 | 27.26 | 4.07 | 27.30 | 4.07 | 3.58 |
|           | 27.67 | 3.73 | 27.62 | 3.74 | 27.66 | 3.74 | 4.25 |
|           | 29.68 | 1.90 | 29.65 | 1.89 | 29.69 | 1.90 | 1.93 |
|           | 29.55 | 2.03 | 29.48 | 2.05 | 29.52 | 2.05 | 2.10 |
|           | 26.95 | 4.39 | 26.92 | 4.38 | 26.94 | 4.40 | 4.56 |
|           | 30.06 | 1.56 | 30.05 | 1.53 | 30.07 | 1.54 | 1.81 |
|           | 29.70 | 1.89 | 29.65 | 1.89 | 29.70 | 1.88 | 1.81 |
|           | 29.05 | 2.48 | 29.02 | 2.47 | 29.06 | 2.46 | 1.81 |
|           | 30.48 | 1.18 | 30.49 | 1.13 | 30.52 | 1.13 | 1.17 |
|           | 30.03 | 1.59 | 30.01 | 1.57 | 30.04 | 1.57 | 1.17 |
|           | 30.47 | 1.19 | 30.45 | 1.17 | 30.48 | 1.17 | 1.17 |
|           | 29.67 | 1.91 | 29.65 | 1.90 | 29.68 | 1.90 | 1.11 |
|           | 30.54 | 1.12 | 30.49 | 1.13 | 30.53 | 1.12 | 1.11 |
|           | 30.31 | 1.34 | 30.26 | 1.34 | 30.30 | 1.34 | 1.11 |
| <b>19</b> | 25.20 | 5.98 | 25.14 | 6.00 | 25.18 | 6.00 | 5.97 |
|           | 28.86 | 2.65 | 28.79 | 2.67 | 28.83 | 2.67 | 2.91 |
|           | 28.74 | 2.76 | 28.69 | 2.77 | 28.73 | 2.77 | 2.74 |
|           | 26.73 | 4.59 | 26.67 | 4.61 | 26.70 | 4.61 | 4.97 |
|           | 27.52 | 3.87 | 27.42 | 3.92 | 27.48 | 3.90 | 4.74 |
|           | 25.10 | 6.06 | 25.06 | 6.07 | 25.10 | 6.08 | 6.00 |
|           | 26.24 | 5.03 | 26.22 | 5.01 | 26.25 | 5.03 | 5.11 |
|           | 24.28 | 6.82 | 24.26 | 6.80 | 24.32 | 6.78 | 6.99 |
|           | 24.49 | 6.63 | 24.44 | 6.64 | 24.49 | 6.63 | 6.99 |
|           | 24.48 | 6.63 | 24.45 | 6.63 | 24.50 | 6.62 | 6.73 |
|           | 24.55 | 6.57 | 24.51 | 6.58 | 24.55 | 6.57 | 6.71 |
|           | 26.07 | 5.19 | 25.92 | 5.29 | 25.97 | 5.28 | 6.99 |
|           | 24.03 | 7.04 | 24.01 | 7.03 | 24.06 | 7.02 | 6.99 |
|           | 26.77 | 4.56 | 26.73 | 4.55 | 26.77 | 4.56 | 4.31 |
|           | 25.21 | 5.96 | 25.17 | 5.97 | 25.22 | 5.97 | 6.01 |
|           | 27.24 | 4.12 | 27.21 | 4.12 | 27.25 | 4.12 | 4.02 |
| <b>20</b> | 27.55 | 3.84 | 27.52 | 3.84 | 27.54 | 3.85 | 3.96 |
|           | 29.20 | 2.35 | 29.17 | 2.33 | 29.21 | 2.33 | 2.35 |



|    |       |      |       |      |       |      |      |
|----|-------|------|-------|------|-------|------|------|
|    | 30.19 | 1.44 | 30.19 | 1.40 | 30.22 | 1.41 | 1.44 |
|    | 28.30 | 3.16 | 28.24 | 3.18 | 28.27 | 3.18 | 3.13 |
|    | 30.54 | 1.13 | 30.45 | 1.17 | 30.49 | 1.16 | 1.26 |
|    | 27.61 | 3.78 | 27.53 | 3.82 | 27.57 | 3.82 | 3.85 |
|    | 22.85 | 8.12 | 22.81 | 8.12 | 22.85 | 8.13 | 8.08 |
|    | 23.80 | 7.25 | 23.78 | 7.24 | 23.82 | 7.24 | 7.24 |
|    | 23.97 | 7.10 | 23.96 | 7.07 | 23.99 | 7.08 | 7.08 |
|    | 23.83 | 7.23 | 23.81 | 7.21 | 23.86 | 7.21 | 7.16 |
|    | 29.60 | 1.98 | 29.61 | 1.93 | 29.64 | 1.94 | 1.89 |
|    | 29.71 | 1.88 | 29.69 | 1.86 | 29.72 | 1.86 | 1.87 |
|    | 28.48 | 3.00 | 28.46 | 2.98 | 28.49 | 2.98 | 3.21 |
|    | 28.52 | 2.96 | 28.45 | 2.98 | 28.49 | 2.98 | 2.87 |
|    | 28.80 | 2.71 | 28.78 | 2.69 | 28.82 | 2.69 | 2.74 |
|    | 27.77 | 3.65 | 27.76 | 3.61 | 27.79 | 3.63 | 3.71 |
|    | 25.06 | 6.11 | 25.03 | 6.10 | 25.08 | 6.09 | 5.92 |
|    | 27.30 | 4.07 | 27.29 | 4.04 | 27.32 | 4.05 | 4.05 |
|    | 27.36 | 4.01 | 27.38 | 3.96 | 27.42 | 3.96 | 4.14 |
|    | 27.26 | 4.10 | 27.22 | 4.11 | 27.25 | 4.12 | 4.27 |
|    | 28.52 | 2.96 | 28.46 | 2.98 | 28.49 | 2.98 | 3.11 |
|    | 28.89 | 2.62 | 28.87 | 2.61 | 28.89 | 2.62 | 2.66 |
| 21 | 22.79 | 8.17 | 22.77 | 8.16 | 22.80 | 8.17 | 8.23 |
|    | 29.56 | 2.01 | 29.52 | 2.01 | 29.56 | 2.01 | 1.72 |
|    | 28.08 | 3.36 | 28.04 | 3.36 | 28.08 | 3.36 | 3.24 |
|    | 27.97 | 3.46 | 27.97 | 3.42 | 28.00 | 3.44 | 3.18 |
|    | 29.51 | 2.06 | 29.46 | 2.07 | 29.51 | 2.05 | 2.46 |
|    | 27.59 | 3.81 | 27.59 | 3.77 | 27.61 | 3.79 | 3.62 |
|    | 23.72 | 7.33 | 23.71 | 7.30 | 23.75 | 7.30 | 7.26 |
|    | 23.97 | 7.09 | 23.96 | 7.07 | 24.00 | 7.08 | 7.18 |
|    | 23.88 | 7.18 | 23.86 | 7.16 | 23.90 | 7.17 | 7.29 |
|    | 28.95 | 2.57 | 28.86 | 2.61 | 28.89 | 2.62 | 2.88 |
|    | 27.59 | 3.81 | 27.49 | 3.86 | 27.54 | 3.85 | 3.86 |
|    | 28.91 | 2.61 | 28.84 | 2.63 | 28.91 | 2.61 | 1.78 |
|    | 30.28 | 1.36 | 30.28 | 1.32 | 30.32 | 1.32 | 1.78 |
|    | 27.11 | 4.24 | 27.06 | 4.26 | 27.09 | 4.26 | 4.45 |
|    | 28.08 | 3.36 | 27.99 | 3.40 | 28.03 | 3.40 | 2.74 |
|    | 28.62 | 2.87 | 28.60 | 2.85 | 28.63 | 2.86 | 3.36 |
|    | 25.80 | 5.43 | 25.78 | 5.42 | 25.82 | 5.41 | 5.43 |
|    | 29.21 | 2.33 | 29.15 | 2.35 | 29.19 | 2.35 | 2.14 |
|    | 28.39 | 3.08 | 28.39 | 3.04 | 28.42 | 3.04 | 3.03 |
|    | 29.32 | 2.24 | 29.28 | 2.23 | 29.32 | 2.23 | 1.73 |
|    | 28.52 | 2.96 | 28.43 | 3.00 | 28.46 | 3.01 | 2.57 |
|    | 29.95 | 1.67 | 29.92 | 1.64 | 29.96 | 1.64 | 1.78 |
|    | 27.20 | 4.16 | 27.17 | 4.15 | 27.19 | 4.17 | 4.62 |
|    | 29.26 | 2.29 | 29.21 | 2.29 | 29.27 | 2.28 | 1.72 |
|    | 29.91 | 1.70 | 29.91 | 1.66 | 29.94 | 1.66 | 1.72 |
|    | 29.99 | 1.62 | 29.99 | 1.58 | 30.03 | 1.58 | 1.72 |
|    | 25.60 | 5.61 | 25.57 | 5.61 | 25.61 | 5.61 | 5.62 |
|    | 27.89 | 3.53 | 27.87 | 3.52 | 27.90 | 3.52 | 3.59 |
|    | 28.34 | 3.12 | 28.31 | 3.12 | 28.34 | 3.12 | 2.91 |
|    | 29.84 | 1.76 | 29.81 | 1.75 | 29.84 | 1.75 | 1.62 |

|           |       |       |       |       |       |       |      |
|-----------|-------|-------|-------|-------|-------|-------|------|
|           | 29.61 | 1.97  | 29.57 | 1.97  | 29.60 | 1.97  | 2.04 |
|           | 28.42 | 3.05  | 28.36 | 3.07  | 28.40 | 3.06  | 3.03 |
|           | 29.88 | 1.73  | 29.82 | 1.74  | 29.85 | 1.74  | 1.61 |
|           | 28.00 | 3.44  | 27.94 | 3.45  | 27.97 | 3.45  | 3.06 |
|           | 24.58 | 6.54  | 24.53 | 6.56  | 24.58 | 6.55  | 6.52 |
|           | 24.03 | 7.04  | 24.02 | 7.02  | 24.06 | 7.02  | 7.17 |
|           | 24.37 | 6.74  | 24.37 | 6.70  | 24.40 | 6.71  | 6.85 |
|           | 24.01 | 7.06  | 23.98 | 7.06  | 24.02 | 7.05  | 7.09 |
|           | 28.40 | 3.07  | 28.42 | 3.02  | 28.44 | 3.03  | 3.18 |
|           | 28.73 | 2.77  | 28.75 | 2.71  | 28.79 | 2.71  | 2.71 |
|           | 28.05 | 3.39  | 28.00 | 3.39  | 28.03 | 3.41  | 3.51 |
| <b>22</b> | 29.40 | 2.16  | 29.38 | 2.14  | 29.43 | 2.13  | 1.52 |
|           | 30.06 | 1.56  | 30.01 | 1.57  | 30.05 | 1.56  | 1.52 |
|           | 30.00 | 1.62  | 29.98 | 1.59  | 30.02 | 1.59  | 1.52 |
|           | 29.64 | 1.95  | 29.61 | 1.93  | 29.65 | 1.93  | 1.52 |
|           | 30.42 | 1.24  | 30.40 | 1.21  | 30.43 | 1.22  | 1.52 |
|           | 30.01 | 1.61  | 30.01 | 1.57  | 30.04 | 1.57  | 1.52 |
|           | 24.72 | 6.41  | 24.67 | 6.42  | 24.73 | 6.42  | 6.16 |
|           | 23.79 | 7.26  | 23.80 | 7.22  | 23.84 | 7.22  | 7.21 |
|           | 23.68 | 7.36  | 23.65 | 7.36  | 23.68 | 7.37  | 7.32 |
|           | 28.33 | 3.13  | 28.22 | 3.19  | 28.29 | 3.16  | 3.27 |
|           | 28.26 | 3.20  | 28.21 | 3.21  | 28.25 | 3.20  | 3.35 |
|           | 23.97 | 7.10  | 23.98 | 7.06  | 24.02 | 7.06  | 6.93 |
|           | 23.87 | 7.18  | 23.87 | 7.15  | 23.92 | 7.15  | 7.03 |
|           | 23.99 | 7.08  | 23.94 | 7.09  | 23.98 | 7.10  | 7.48 |
|           | 25.85 | 5.38  | 25.82 | 5.38  | 25.87 | 5.37  | 5.10 |
|           | 25.87 | 5.37  | 25.82 | 5.38  | 25.87 | 5.37  | 4.99 |
|           | 23.88 | 7.18  | 23.84 | 7.18  | 23.90 | 7.17  | 7.39 |
|           | 23.63 | 7.40  | 23.60 | 7.40  | 23.64 | 7.41  | 7.49 |
|           | 23.99 | 7.08  | 23.95 | 7.08  | 24.00 | 7.08  | 7.10 |
|           | 23.84 | 7.22  | 23.80 | 7.22  | 23.84 | 7.22  | 7.19 |
|           | 30.18 | 1.45  | 30.15 | 1.44  | 30.19 | 1.43  | 1.57 |
|           | 29.94 | 1.67  | 29.92 | 1.65  | 29.96 | 1.64  | 1.57 |
|           | 30.19 | 1.45  | 30.18 | 1.41  | 30.21 | 1.42  | 1.57 |
|           | 31.48 | 0.27  | 31.39 | 0.31  | 31.45 | 0.29  | 1.29 |
|           | 31.22 | 0.51  | 31.19 | 0.50  | 31.23 | 0.49  | 1.29 |
|           | 33.17 | -1.27 | 33.04 | -1.19 | 33.09 | -1.21 | 1.29 |
| <b>23</b> | 27.20 | 4.16  | 27.19 | 4.13  | 27.23 | 4.13  | 4.62 |
|           | 28.48 | 3.00  | 28.41 | 3.02  | 28.44 | 3.03  | 5.01 |
|           | 28.71 | 2.79  | 28.69 | 2.77  | 28.73 | 2.77  | 2.05 |
|           | 30.78 | 0.91  | 30.77 | 0.88  | 30.79 | 0.89  | 1.60 |
|           | 26.37 | 4.91  | 26.36 | 4.88  | 26.39 | 4.90  | 5.58 |
|           | 26.54 | 4.76  | 26.47 | 4.79  | 26.51 | 4.79  | 4.68 |
|           | 28.01 | 3.43  | 27.97 | 3.42  | 28.02 | 3.41  | 3.90 |
|           | 28.49 | 2.99  | 28.47 | 2.97  | 28.50 | 2.97  | 3.09 |
|           | 28.36 | 3.11  | 28.29 | 3.13  | 28.32 | 3.14  | 3.70 |
|           | 28.98 | 2.54  | 28.94 | 2.54  | 28.97 | 2.55  | 2.80 |
|           | 29.69 | 1.90  | 29.65 | 1.90  | 29.68 | 1.90  | 2.71 |
|           | 30.46 | 1.20  | 30.41 | 1.20  | 30.45 | 1.20  | 1.81 |
|           | 30.44 | 1.21  | 30.37 | 1.24  | 30.41 | 1.23  | 1.81 |

|  |       |      |       |      |       |      |      |
|--|-------|------|-------|------|-------|------|------|
|  | 26.91 | 4.42 | 26.83 | 4.46 | 26.87 | 4.46 | 4.85 |
|  | 30.01 | 1.60 | 29.98 | 1.59 | 30.01 | 1.60 | 1.81 |
|  | 30.31 | 1.34 | 30.25 | 1.34 | 30.29 | 1.34 | 1.81 |
|  | 27.70 | 3.71 | 27.64 | 3.73 | 27.66 | 3.74 | 4.32 |
|  | 28.57 | 2.92 | 28.58 | 2.87 | 28.59 | 2.89 | 3.06 |
|  | 29.09 | 2.45 | 29.08 | 2.42 | 29.11 | 2.42 | 3.06 |
|  | 27.65 | 3.75 | 27.62 | 3.75 | 27.65 | 3.75 | 3.95 |
|  | 27.79 | 3.63 | 27.77 | 3.60 | 27.81 | 3.60 | 3.92 |
|  | 26.50 | 4.80 | 26.45 | 4.81 | 26.48 | 4.82 | 4.13 |
|  | 27.31 | 4.06 | 27.29 | 4.04 | 27.31 | 4.06 | 3.85 |
|  | 23.51 | 7.52 | 23.41 | 7.57 | 23.47 | 7.56 | 8.03 |

<sup>[a]</sup> Parameters of linear regression models are presented in Table 2 in main text.

<sup>[b]</sup> For the references to the experimental works, please, see the main text.

**Table S3.** Calculated  $^{13}\text{C}$  NMR shielding constants, together with scaled and experimental chemical shifts – the GIAO-DFT(PBE0) calculations with the first-level basis sets.

| Mol.     | pcS-1    |                         | pecS-1   |                         | pecS-1 mod |                         | $\delta_{exp}^{[b]}$ |
|----------|----------|-------------------------|----------|-------------------------|------------|-------------------------|----------------------|
|          | $\sigma$ | $\delta_{scaled}^{[a]}$ | $\sigma$ | $\delta_{scaled}^{[a]}$ | $\sigma$   | $\delta_{scaled}^{[a]}$ |                      |
| <b>1</b> | 126.4    | 58.3                    | 124.3    | 57.5                    | 124.2      | 58.4                    | 55.5                 |
|          | 149.4    | 36.3                    | 147.1    | 36.3                    | 147.8      | 36.1                    | 33.3                 |
|          | 141.6    | 43.8                    | 138.4    | 44.4                    | 139.3      | 44.1                    | 35.9                 |
|          | 46.7     | 134.9                   | 40.4     | 135.5                   | 42.7       | 135.4                   | 133.2                |
|          | 130.2    | 54.7                    | 128.4    | 53.6                    | 128.6      | 54.2                    | 54.6                 |
|          | 132.5    | 52.5                    | 131.2    | 51.0                    | 131.5      | 51.4                    | 52.0                 |
|          | 40.9     | 140.4                   | 33.5     | 142.0                   | 36.4       | 141.3                   | 135.2                |
|          | 75.9     | 106.8                   | 70.1     | 107.9                   | 72.3       | 107.4                   | 107.3                |
|          | 164.0    | 22.3                    | 162.5    | 21.9                    | 162.8      | 21.9                    | 19.5                 |
|          | 149.3    | 36.4                    | 147.1    | 36.2                    | 147.3      | 36.5                    | 38.5                 |
|          | 56.7     | 125.2                   | 49.7     | 126.9                   | 51.3       | 127.3                   | 128.1                |
|          | 48.6     | 133.1                   | 41.5     | 134.5                   | 43.8       | 134.3                   | 138.1                |
|          | 62.6     | 119.6                   | 57.5     | 119.7                   | 60.0       | 119.1                   | 124.5                |
|          | 36.9     | 144.3                   | 31.3     | 144.1                   | 32.6       | 144.9                   | 145.0                |
|          | 64.2     | 118.0                   | 59.9     | 117.4                   | 61.4       | 117.7                   | 118.6                |
|          | 47.5     | 134.1                   | 40.8     | 135.2                   | 43.1       | 135.0                   | 137.1                |
|          | 72.2     | 110.3                   | 67.9     | 110.0                   | 69.4       | 110.2                   | 112.2                |
|          | 172.4    | 14.2                    | 171.6    | 13.4                    | 172.1      | 13.1                    | 13.0                 |
|          | 56.4     | 125.5                   | 49.8     | 126.8                   | 51.9       | 126.7                   | 130.1                |
|          | 63.5     | 118.7                   | 58.1     | 119.1                   | 60.4       | 118.7                   | 119.8                |
|          | 61.5     | 120.7                   | 56.4     | 120.7                   | 58.6       | 120.4                   | 122.5                |
|          | 61.4     | 120.7                   | 55.1     | 121.9                   | 56.6       | 122.2                   | 122.8                |
|          | 49.4     | 132.2                   | 42.7     | 133.4                   | 45.0       | 133.3                   | 136.9                |
|          | 69.1     | 113.4                   | 64.9     | 112.7                   | 66.4       | 113.0                   | 114.4                |
|          | 42.9     | 138.5                   | 38.5     | 137.3                   | 40.3       | 137.6                   | 137.2                |
|          | 78.6     | 104.2                   | 75.1     | 103.3                   | 75.8       | 104.2                   | 106.7                |
|          | 69.6     | 112.9                   | 65.1     | 112.5                   | 66.6       | 112.8                   | 113.6                |

|          |       |       |       |       |       |       |       |
|----------|-------|-------|-------|-------|-------|-------|-------|
|          | 30.5  | 150.4 | 23.2  | 151.6 | 26.6  | 150.6 | 152.0 |
|          | 65.2  | 117.1 | 60.0  | 117.3 | 62.0  | 117.2 | 119.3 |
| <b>2</b> | 56.6  | 125.4 | 49.1  | 127.5 | 51.4  | 127.2 | 125.7 |
|          | 68.5  | 114.0 | 62.7  | 114.8 | 64.6  | 114.7 | 115.1 |
|          | 58.0  | 124.0 | 53.8  | 123.1 | 55.4  | 123.4 | 124.1 |
|          | 46.6  | 134.9 | 39.6  | 136.3 | 41.9  | 136.1 | 137.0 |
|          | 71.0  | 111.6 | 66.5  | 111.3 | 68.0  | 111.5 | 111.4 |
|          | 59.6  | 122.5 | 54.2  | 122.7 | 56.5  | 122.4 | 122.3 |
|          | 62.5  | 119.7 | 57.1  | 120.0 | 59.2  | 119.9 | 119.9 |
|          | 61.9  | 120.3 | 56.6  | 120.5 | 58.3  | 120.7 | 120.4 |
|          | 118.1 | 66.3  | 113.3 | 67.7  | 113.7 | 68.3  | 68.2  |
|          | 66.5  | 115.9 | 61.5  | 115.9 | 63.2  | 116.1 | 115.1 |
|          | 57.9  | 124.1 | 50.2  | 126.4 | 52.3  | 126.3 | 125.7 |
|          | 47.2  | 134.4 | 40.1  | 135.9 | 42.3  | 135.8 | 137.0 |
|          | 55.1  | 126.8 | 50.4  | 126.3 | 52.2  | 126.5 | 124.1 |
|          | 61.8  | 120.3 | 56.5  | 120.6 | 58.3  | 120.7 | 120.4 |
|          | 62.8  | 119.4 | 57.3  | 119.8 | 59.4  | 119.6 | 119.9 |
|          | 60.2  | 121.9 | 54.8  | 122.2 | 57.0  | 121.9 | 122.3 |
|          | 72.1  | 110.5 | 67.6  | 110.2 | 69.2  | 110.4 | 111.4 |
|          | -22.3 | 201.1 | -26.4 | 197.7 | -24.4 | 198.9 | 201.5 |
|          | 62.9  | 119.3 | 55.4  | 121.6 | 57.6  | 121.4 | 120.8 |
|          | 20.0  | 160.5 | 12.6  | 161.5 | 16.2  | 160.4 | 160.3 |
|          | 55.7  | 126.2 | 50.2  | 126.4 | 52.0  | 126.6 | 125.5 |
|          | 63.5  | 118.7 | 58.2  | 119.0 | 60.2  | 118.8 | 119.4 |
|          | 43.0  | 138.4 | 36.9  | 138.8 | 39.4  | 138.6 | 137.6 |
|          | 69.5  | 113.0 | 65.1  | 112.5 | 66.4  | 113.0 | 112.9 |
| <b>3</b> | 145.7 | 39.9  | 141.5 | 41.5  | 142.4 | 41.1  | 40.3  |
|          | 127.7 | 57.1  | 124.7 | 57.1  | 124.4 | 58.2  | 64.8  |
|          | 147.1 | 38.5  | 143.8 | 39.3  | 144.6 | 39.1  | 39.2  |
|          | 114.5 | 69.8  | 109.8 | 70.9  | 111.0 | 70.8  | 72.2  |
|          | 121.4 | 63.2  | 119.9 | 61.6  | 120.1 | 62.3  | 65.5  |
|          | 143.3 | 42.1  | 140.9 | 42.0  | 141.1 | 42.4  | 41.7  |
|          | 152.8 | 33.0  | 151.4 | 32.2  | 151.9 | 32.1  | 32.7  |
|          | 34.3  | 146.7 | 29.2  | 146.0 | 31.4  | 146.1 | 138.6 |
|          | 6.1   | 173.9 | 0.2   | 173.0 | 3.0   | 173.0 | 172.7 |
|          | 47.5  | 134.1 | 42.8  | 133.4 | 44.1  | 134.1 | 137.9 |
|          | 136.5 | 48.6  | 135.1 | 47.4  | 135.2 | 48.0  | 49.5  |
|          | 143.9 | 41.6  | 142.3 | 40.7  | 142.8 | 40.8  | 41.6  |
|          | 144.3 | 41.1  | 143.1 | 40.0  | 143.0 | 40.5  | 41.9  |
|          | 126.0 | 58.7  | 125.0 | 56.8  | 125.0 | 57.6  | 52.9  |
|          | 39.0  | 142.2 | 34.0  | 141.5 | 34.8  | 142.9 | 143.3 |
|          | 163.2 | 23.0  | 161.1 | 23.2  | 162.0 | 22.6  | 21.1  |
|          | 157.7 | 28.3  | 156.5 | 27.5  | 157.2 | 27.2  | 25.9  |
|          | 161.3 | 24.8  | 159.6 | 24.6  | 160.7 | 23.9  | 24.5  |
|          | 49.7  | 132.0 | 42.4  | 133.7 | 45.2  | 133.1 | 132.6 |
|          | 157.0 | 29.0  | 155.4 | 28.5  | 156.3 | 28.0  | 26.5  |
|          | 49.3  | 132.3 | 44.6  | 131.6 | 46.8  | 131.5 | 128.5 |
|          | 153.5 | 32.3  | 151.7 | 31.9  | 152.7 | 31.4  | 25.9  |
|          | 54.4  | 127.5 | 47.4  | 129.1 | 49.8  | 128.7 | 128.5 |
|          | 154.6 | 31.3  | 152.8 | 30.9  | 153.7 | 30.5  | 25.8  |

|   |       |       |       |       |       |       |       |
|---|-------|-------|-------|-------|-------|-------|-------|
|   | 47.1  | 134.4 | 42.3  | 133.8 | 44.3  | 133.9 | 131.8 |
|   | 42.7  | 138.7 | 38.3  | 137.5 | 40.1  | 137.8 | 137.8 |
|   | 61.9  | 120.2 | 55.2  | 121.8 | 57.0  | 121.9 | 121.0 |
|   | 67.9  | 114.5 | 63.6  | 114.0 | 65.1  | 114.2 | 113.7 |
|   | 43.3  | 138.1 | 36.1  | 139.6 | 38.4  | 139.4 | 140.6 |
|   | 21.7  | 158.9 | 15.5  | 158.8 | 17.6  | 159.1 | 148.1 |
|   | 59.2  | 122.9 | 54.6  | 122.3 | 56.1  | 122.8 | 121.6 |
|   | 71.0  | 111.5 | 66.6  | 111.1 | 68.1  | 111.4 | 111.9 |
|   | 61.8  | 120.3 | 57.2  | 119.9 | 59.5  | 119.5 | 121.0 |
|   | 62.2  | 120.0 | 56.6  | 120.5 | 58.9  | 120.1 | 119.5 |
|   | 52.3  | 129.4 | 46.6  | 129.8 | 49.0  | 129.5 | 128.2 |
|   | 14.5  | 165.8 | 8.4   | 165.4 | 12.1  | 164.3 | 167.0 |
| 4 | 18.9  | 161.6 | 13.0  | 161.0 | 15.0  | 161.6 | 161.4 |
|   | 130.7 | 54.2  | 128.5 | 53.5  | 128.2 | 54.6  | 55.0  |
|   | 11.5  | 168.6 | 6.9   | 166.7 | 8.6   | 167.6 | 168.2 |
|   | 135.9 | 49.3  | 133.8 | 48.6  | 133.8 | 49.3  | 48.7  |
|   | 131.3 | 53.6  | 125.8 | 56.1  | 127.7 | 55.1  | 52.4  |
|   | 45.7  | 135.8 | 38.8  | 137.1 | 40.6  | 137.4 | 134.9 |
|   | 57.7  | 124.3 | 52.4  | 124.4 | 54.2  | 124.5 | 122.6 |
|   | 58.4  | 123.6 | 52.9  | 124.0 | 54.7  | 124.1 | 122.8 |
|   | 49.5  | 132.2 | 43.5  | 132.7 | 45.9  | 132.4 | 130.0 |
|   | 70.7  | 111.8 | 66.2  | 111.6 | 67.5  | 111.9 | 111.1 |
|   | 37.2  | 144.0 | 29.8  | 145.4 | 32.9  | 144.7 | 144.8 |
|   | 143.9 | 41.6  | 139.3 | 43.5  | 140.7 | 42.8  | 41.8  |
|   | 97.7  | 85.9  | 94.7  | 85.0  | 95.1  | 85.9  | 87.3  |
|   | 89.8  | 93.5  | 85.5  | 93.6  | 86.5  | 94.0  | 92.6  |
|   | 154.8 | 31.1  | 152.2 | 31.5  | 152.6 | 31.5  | 31.1  |
|   | 114.2 | 70.1  | 112.5 | 68.4  | 112.6 | 69.3  | 69.2  |
|   | 148.7 | 37.0  | 146.5 | 36.8  | 146.8 | 37.0  | 35.8  |
|   | 135.6 | 49.5  | 130.7 | 51.5  | 131.7 | 51.3  | 50.8  |
|   | 107.6 | 76.4  | 104.6 | 75.8  | 104.6 | 76.9  | 76.2  |
|   | 11.2  | 168.9 | 6.3   | 167.4 | 9.3   | 167.0 | 169.1 |
|   | 132.2 | 52.8  | 131.2 | 51.1  | 131.4 | 51.5  | 51.7  |
|   | 89.7  | 93.6  | 86.4  | 92.8  | 86.1  | 94.4  | 93.6  |
|   | 135.0 | 50.1  | 133.4 | 49.0  | 133.7 | 49.4  | 48.6  |
|   | 131.1 | 53.8  | 129.9 | 52.3  | 130.3 | 52.6  | 51.6  |
|   | 152.7 | 33.1  | 151.6 | 32.1  | 152.2 | 31.9  | 30.6  |
|   | 127.9 | 56.9  | 123.0 | 58.7  | 124.6 | 58.0  | 57.0  |
|   | 42.4  | 139.0 | 36.1  | 139.6 | 37.8  | 140.0 | 136.6 |
|   | 63.1  | 119.1 | 58.4  | 118.8 | 60.1  | 119.0 | 116.3 |
|   | 58.7  | 123.3 | 53.5  | 123.4 | 55.4  | 123.4 | 121.6 |
|   | 66.5  | 115.9 | 61.3  | 116.1 | 63.0  | 116.2 | 116.5 |
|   | 40.7  | 140.6 | 34.5  | 141.1 | 37.4  | 140.4 | 142.0 |
|   | 46.0  | 135.5 | 38.6  | 137.3 | 41.7  | 136.3 | 136.1 |
|   | 158.3 | 27.7  | 156.7 | 27.3  | 157.6 | 26.7  | 25.5  |
|   | 102.5 | 81.3  | 99.7  | 80.4  | 100.2 | 81.0  | 80.5  |
|   | 154.0 | 31.8  | 150.5 | 33.0  | 151.5 | 32.5  | 31.2  |
|   | 152.0 | 33.8  | 149.5 | 34.0  | 150.0 | 34.0  | 31.6  |
|   | 117.2 | 67.2  | 115.7 | 65.5  | 115.9 | 66.2  | 65.1  |
|   | 146.7 | 38.8  | 144.5 | 38.6  | 145.3 | 38.4  | 36.8  |

|   |       |       |       |       |       |       |       |
|---|-------|-------|-------|-------|-------|-------|-------|
|   | 141.3 | 44.0  | 136.2 | 46.4  | 137.8 | 45.5  | 46.3  |
|   | 121.4 | 63.1  | 118.5 | 62.9  | 118.2 | 64.1  | 64.7  |
|   | 153.6 | 32.2  | 151.2 | 32.4  | 151.4 | 32.6  | 29.3  |
|   | 134.4 | 50.7  | 132.7 | 49.7  | 132.7 | 50.4  | 50.7  |
|   | 21.7  | 158.8 | 15.7  | 158.6 | 17.6  | 159.1 | 158.7 |
|   | 132.0 | 53.0  | 130.5 | 51.7  | 130.2 | 52.7  | 53.5  |
|   | 19.1  | 161.3 | 14.4  | 159.8 | 16.7  | 160.0 | 158.7 |
|   | 78.0  | 104.8 | 73.0  | 105.2 | 74.6  | 105.3 | 104.6 |
|   | 123.8 | 60.9  | 118.1 | 63.2  | 119.7 | 62.6  | 60.9  |
|   | 45.5  | 136.0 | 39.0  | 136.8 | 40.2  | 137.8 | 135.4 |
|   | 54.6  | 127.2 | 49.6  | 127.0 | 51.2  | 127.4 | 124.4 |
|   | 57.4  | 124.6 | 52.0  | 124.8 | 53.7  | 125.0 | 123.4 |
|   | 48.8  | 132.8 | 43.3  | 132.9 | 45.5  | 132.8 | 131.2 |
|   | 70.3  | 112.2 | 66.0  | 111.7 | 67.1  | 112.3 | 111.6 |
|   | 37.7  | 143.5 | 30.8  | 144.6 | 33.7  | 143.9 | 144.7 |
|   | 147.0 | 38.6  | 142.8 | 40.2  | 143.8 | 39.8  | 39.8  |
|   | 98.0  | 85.6  | 95.2  | 84.5  | 95.6  | 85.4  | 87.1  |
|   | 83.7  | 99.3  | 80.1  | 98.7  | 80.9  | 99.3  | 98.4  |
|   | 156.8 | 29.2  | 154.3 | 29.5  | 154.2 | 30.0  | 28.2  |
|   | 119.0 | 65.5  | 117.9 | 63.4  | 118.1 | 64.1  | 64.3  |
|   | 148.2 | 37.4  | 146.3 | 37.0  | 146.8 | 37.0  | 37.0  |
|   | 136.8 | 48.3  | 131.8 | 50.5  | 133.0 | 50.0  | 49.1  |
|   | 112.1 | 72.1  | 109.4 | 71.3  | 108.8 | 73.0  | 72.1  |
|   | 12.2  | 168.0 | 7.0   | 166.7 | 10.2  | 166.1 | 168.6 |
|   | 132.1 | 52.8  | 131.2 | 51.0  | 131.4 | 51.5  | 51.9  |
|   | 89.7  | 93.6  | 86.3  | 92.8  | 85.9  | 94.6  | 93.2  |
|   | 134.8 | 50.3  | 133.4 | 49.0  | 133.6 | 49.5  | 48.6  |
|   | 131.3 | 53.6  | 130.1 | 52.1  | 130.5 | 52.4  | 51.6  |
|   | 151.2 | 34.5  | 150.2 | 33.3  | 150.8 | 33.2  | 31.4  |
|   | 127.5 | 57.3  | 122.8 | 58.9  | 124.3 | 58.3  | 56.0  |
|   | 43.3  | 138.1 | 37.2  | 138.6 | 38.6  | 139.3 | 135.9 |
|   | 60.5  | 121.6 | 56.0  | 121.0 | 57.6  | 121.3 | 115.9 |
|   | 58.5  | 123.5 | 53.2  | 123.7 | 55.1  | 123.7 | 120.9 |
|   | 56.6  | 125.4 | 51.4  | 125.4 | 53.4  | 125.3 | 118.9 |
|   | 42.7  | 138.7 | 36.6  | 139.2 | 39.1  | 138.9 | 142.0 |
|   | 40.0  | 141.3 | 32.9  | 142.5 | 36.0  | 141.7 | 136.9 |
|   | 158.3 | 27.8  | 156.8 | 27.2  | 157.6 | 26.8  | 25.5  |
|   | 102.7 | 81.1  | 99.9  | 80.2  | 100.5 | 80.8  | 80.5  |
|   | 153.2 | 32.6  | 150.1 | 33.4  | 150.8 | 33.2  | 32.3  |
|   | 152.3 | 33.5  | 150.0 | 33.6  | 150.4 | 33.6  | 32.1  |
|   | 117.6 | 66.8  | 116.2 | 65.0  | 116.4 | 65.7  | 64.8  |
|   | 147.4 | 38.1  | 145.5 | 37.7  | 146.1 | 37.6  | 36.2  |
|   | 141.3 | 44.0  | 136.3 | 46.3  | 137.8 | 45.5  | 46.1  |
|   | 121.8 | 62.8  | 118.9 | 62.5  | 118.5 | 63.7  | 64.7  |
|   | 149.1 | 36.6  | 147.2 | 36.1  | 147.7 | 36.2  | 36.0  |
|   | 141.2 | 44.1  | 139.6 | 43.2  | 139.3 | 44.1  | 45.2  |
| 5 | 124.1 | 60.5  | 119.4 | 62.0  | 120.5 | 61.9  | 62.3  |
|   | 122.0 | 62.6  | 118.9 | 62.5  | 119.0 | 63.3  | 63.8  |
|   | 143.2 | 42.2  | 141.3 | 41.7  | 141.7 | 41.8  | 42.5  |
|   | 97.1  | 86.5  | 93.4  | 86.2  | 94.1  | 86.8  | 88.0  |

|   |       |       |       |       |       |       |       |
|---|-------|-------|-------|-------|-------|-------|-------|
|   | 131.3 | 53.7  | 128.2 | 53.8  | 128.8 | 54.0  | 53.7  |
|   | 141.5 | 43.8  | 138.4 | 44.4  | 139.5 | 43.9  | 44.6  |
|   | 107.8 | 76.2  | 103.6 | 76.7  | 104.7 | 76.8  | 77.7  |
|   | 150.7 | 35.0  | 149.2 | 34.3  | 149.5 | 34.4  | 35.9  |
|   | 102.5 | 81.3  | 98.9  | 81.1  | 99.5  | 81.7  | 83.5  |
|   | 129.2 | 55.7  | 125.0 | 56.8  | 126.0 | 56.7  | 57.5  |
|   | 31.7  | 149.2 | 26.6  | 148.4 | 28.4  | 148.9 | 145.9 |
|   | 137.3 | 47.8  | 133.7 | 48.7  | 134.5 | 48.7  | 49.5  |
|   | 146.4 | 39.2  | 144.4 | 38.7  | 145.1 | 38.6  | 35.9  |
|   | 45.6  | 136.0 | 39.4  | 136.5 | 42.4  | 135.7 | 133.7 |
|   | 169.4 | 17.1  | 168.3 | 16.5  | 168.9 | 16.1  | 17.4  |
|   | 160.3 | 25.8  | 158.0 | 26.1  | 159.0 | 25.5  | 25.0  |
|   | 111.5 | 72.6  | 106.8 | 73.7  | 108.3 | 73.4  | 73.8  |
|   | 159.8 | 26.3  | 158.5 | 25.6  | 159.0 | 25.5  | 27.6  |
|   | 143.0 | 42.4  | 139.2 | 43.6  | 140.8 | 42.6  | 43.2  |
|   | 103.0 | 80.8  | 99.9  | 80.2  | 100.3 | 80.9  | 82.2  |
|   | 167.6 | 18.8  | 167.0 | 17.7  | 167.0 | 17.9  | 17.1  |
|   | 140.6 | 44.7  | 138.4 | 44.3  | 139.0 | 44.3  | 42.1  |
|   | 0.1   | 179.6 | -6.6  | 179.4 | -3.1  | 178.7 | 178.9 |
|   | 136.9 | 48.2  | 133.5 | 48.9  | 134.2 | 48.9  | 50.1  |
|   | 162.2 | 24.0  | 159.9 | 24.4  | 160.8 | 23.7  | 24.0  |
|   | 156.2 | 29.8  | 154.8 | 29.0  | 155.4 | 28.9  | 30.0  |
|   | 174.5 | 12.2  | 173.3 | 11.9  | 174.0 | 11.3  | 12.7  |
|   | 143.4 | 42.1  | 139.9 | 42.9  | 141.3 | 42.2  | 43.5  |
|   | -0.3  | 179.9 | -6.7  | 179.5 | -3.5  | 179.1 | 178.9 |
|   | 174.7 | 12.0  | 173.5 | 11.6  | 174.2 | 11.1  | 12.9  |
| 6 | 45.4  | 136.1 | 39.6  | 136.3 | 42.0  | 136.1 | 135.3 |
|   | 54.2  | 127.6 | 48.7  | 127.9 | 51.0  | 127.6 | 128.0 |
|   | 53.2  | 128.6 | 47.5  | 128.9 | 49.4  | 129.1 | 127.4 |
|   | 62.7  | 119.5 | 54.4  | 122.5 | 57.0  | 121.9 | 121.3 |
|   | 37.1  | 144.1 | 30.3  | 145.0 | 32.6  | 144.9 | 146.3 |
|   | 54.6  | 127.3 | 49.6  | 127.0 | 51.2  | 127.4 | 131.8 |
|   | 17.9  | 162.5 | 13.0  | 161.1 | 15.5  | 161.1 | 162.2 |
|   | 23.8  | 156.8 | 19.4  | 155.1 | 20.7  | 156.2 | 155.3 |
|   | 49.9  | 131.8 | 43.3  | 132.9 | 45.4  | 132.9 | 133.7 |
|   | 55.2  | 126.7 | 48.3  | 128.2 | 50.0  | 128.5 | 130.4 |
|   | 14.5  | 165.8 | 9.4   | 164.5 | 12.3  | 164.1 | 168.4 |
|   | 125.9 | 58.9  | 123.0 | 58.6  | 123.6 | 59.0  | 50.7  |
|   | 52.4  | 129.4 | 46.4  | 130.0 | 48.5  | 129.9 | 128.6 |
|   | 47.5  | 134.0 | 42.5  | 133.6 | 44.3  | 133.9 | 127.8 |
|   | 52.5  | 129.3 | 47.4  | 129.1 | 49.6  | 128.9 | 129.3 |
|   | 49.6  | 132.1 | 44.0  | 132.3 | 46.0  | 132.2 | 129.9 |
|   | 140.5 | 44.8  | 138.0 | 44.8  | 139.1 | 44.3  | 42.9  |
|   | 106.4 | 77.5  | 102.2 | 78.1  | 103.6 | 77.8  | 80.9  |
|   | 45.0  | 136.4 | 38.0  | 137.8 | 39.8  | 138.1 | 139.6 |
|   | 44.3  | 137.2 | 37.7  | 138.1 | 40.2  | 137.8 | 136.3 |
|   | 97.2  | 86.4  | 95.1  | 84.6  | 94.8  | 86.2  | 86.8  |
|   | 57.1  | 124.9 | 52.4  | 124.4 | 53.9  | 124.8 | 124.0 |
|   | 57.3  | 124.7 | 52.4  | 124.4 | 54.2  | 124.5 | 126.0 |
|   | 49.1  | 132.6 | 43.7  | 132.5 | 45.9  | 132.4 | 129.8 |

|   |       |       |       |       |       |       |       |
|---|-------|-------|-------|-------|-------|-------|-------|
|   | 64.4  | 117.9 | 59.8  | 117.5 | 61.0  | 118.1 | 115.9 |
|   | 117.9 | 66.5  | 115.4 | 65.7  | 116.0 | 66.2  | 62.0  |
|   | 9.6   | 170.5 | 4.7   | 168.9 | 7.5   | 168.7 | 171.4 |
|   | 153.4 | 32.5  | 151.4 | 32.2  | 152.2 | 31.9  | 34.5  |
|   | 161.0 | 25.1  | 158.6 | 25.5  | 160.0 | 24.5  | 25.2  |
|   | 162.3 | 23.9  | 161.4 | 22.9  | 161.7 | 22.9  | 23.6  |
|   | 163.0 | 23.2  | 161.9 | 22.5  | 162.1 | 22.5  | 21.4  |
| 7 | 111.7 | 72.5  | 108.0 | 72.7  | 107.8 | 73.9  | 73.8  |
|   | 100.2 | 83.5  | 98.0  | 82.0  | 97.3  | 83.8  | 80.2  |
|   | 109.8 | 74.3  | 105.7 | 74.7  | 105.6 | 76.0  | 73.6  |
|   | 141.2 | 44.1  | 138.7 | 44.0  | 139.7 | 43.7  | 42.7  |
|   | 52.0  | 129.8 | 45.3  | 131.0 | 47.3  | 131.0 | 126.7 |
|   | 107.2 | 76.8  | 104.0 | 76.4  | 103.6 | 77.9  | 76.3  |
|   | 19.7  | 160.8 | 15.6  | 158.6 | 18.3  | 158.5 | 163.1 |
|   | 16.7  | 163.7 | 11.6  | 162.4 | 14.7  | 161.9 | 165.6 |
|   | 32.9  | 148.1 | 25.7  | 149.3 | 28.7  | 148.7 | 148.4 |
|   | 47.4  | 134.2 | 40.3  | 135.7 | 42.9  | 135.2 | 134.1 |
|   | 53.7  | 128.2 | 49.2  | 127.4 | 50.8  | 127.7 | 127.3 |
|   | 57.6  | 124.4 | 52.2  | 124.6 | 54.1  | 124.6 | 125.0 |
|   | 122.1 | 62.4  | 120.8 | 60.7  | 121.8 | 60.6  | 60.4  |
|   | 73.1  | 109.5 | 67.2  | 110.7 | 69.4  | 110.2 | 107.8 |
|   | 52.7  | 129.1 | 45.4  | 130.9 | 47.5  | 130.8 | 130.4 |
|   | 71.1  | 111.4 | 66.4  | 111.4 | 68.0  | 111.5 | 111.1 |
|   | 160.8 | 25.3  | 160.1 | 24.2  | 160.4 | 24.1  | 27.5  |
|   | 158.0 | 28.0  | 156.0 | 27.9  | 156.4 | 27.9  | 27.1  |
|   | 61.9  | 120.3 | 56.4  | 120.7 | 58.4  | 120.6 | 120.3 |
|   | 72.1  | 110.5 | 66.7  | 111.1 | 68.5  | 111.0 | 111.5 |
|   | 107.4 | 76.5  | 103.5 | 76.8  | 103.2 | 78.2  | 74.9  |
|   | 50.0  | 131.7 | 44.2  | 132.0 | 46.5  | 131.9 | 131.4 |
|   | 57.0  | 124.9 | 52.3  | 124.5 | 54.2  | 124.6 | 119.2 |
|   | 109.0 | 75.0  | 105.1 | 75.4  | 104.8 | 76.7  | 76.6  |
|   | 59.6  | 122.5 | 54.2  | 122.7 | 56.2  | 122.6 | 122.8 |
|   | 17.1  | 163.3 | 12.2  | 161.9 | 15.0  | 161.6 | 165.6 |
|   | 62.9  | 119.3 | 57.5  | 119.7 | 59.6  | 119.5 | 120.6 |
|   | 14.2  | 166.1 | 9.2   | 164.7 | 12.4  | 164.0 | 166.8 |
|   | 160.2 | 25.9  | 159.5 | 24.7  | 159.9 | 24.6  | 28.3  |
|   | 121.0 | 63.6  | 119.2 | 62.2  | 120.1 | 62.3  | 61.1  |
|   | 162.0 | 24.2  | 161.4 | 22.9  | 161.6 | 23.0  | 27.5  |
| 8 | 146.4 | 39.2  | 141.8 | 41.1  | 143.1 | 40.5  | 40.5  |
|   | 129.6 | 55.3  | 126.3 | 55.6  | 126.6 | 56.1  | 56.7  |
|   | 121.7 | 62.8  | 118.7 | 62.7  | 119.3 | 63.0  | 62.9  |
|   | 155.0 | 30.9  | 151.0 | 32.6  | 152.0 | 32.1  | 31.7  |
|   | 103.1 | 80.8  | 100.5 | 79.6  | 100.8 | 80.4  | 81.1  |
|   | 136.1 | 49.1  | 132.4 | 49.9  | 133.1 | 49.9  | 50.3  |
|   | 153.2 | 32.7  | 151.1 | 32.5  | 152.0 | 32.1  | 32.2  |
|   | 145.7 | 39.8  | 143.9 | 39.2  | 144.3 | 39.4  | 39.9  |
|   | 143.8 | 41.6  | 140.7 | 42.2  | 142.3 | 41.3  | 42.0  |
|   | 164.7 | 21.5  | 162.2 | 22.1  | 163.1 | 21.6  | 21.1  |
|   | 149.5 | 36.2  | 144.6 | 38.5  | 146.3 | 37.5  | 37.2  |
|   | 75.5  | 107.2 | 71.3  | 106.8 | 72.1  | 107.6 | 109.3 |



|   |       |       |       |       |       |       |       |
|---|-------|-------|-------|-------|-------|-------|-------|
|   | 169.9 | 16.6  | 168.3 | 16.5  | 168.6 | 16.4  | 16.3  |
|   | 152.8 | 33.1  | 151.0 | 32.6  | 151.5 | 32.5  | 32.3  |
|   | 36.7  | 144.4 | 30.0  | 145.3 | 32.1  | 145.4 | 140.8 |
|   | 147.8 | 37.9  | 145.6 | 37.6  | 146.1 | 37.6  | 37.5  |
|   | 172.0 | 14.6  | 171.0 | 14.0  | 171.5 | 13.6  | 15.0  |
|   | 154.4 | 31.5  | 152.4 | 31.3  | 153.4 | 30.7  | 31.7  |
|   | 57.1  | 124.9 | 53.0  | 123.8 | 55.1  | 123.7 | 121.8 |
|   | 166.4 | 20.0  | 164.9 | 19.6  | 165.2 | 19.6  | 19.4  |
|   | 143.9 | 41.5  | 141.6 | 41.3  | 142.3 | 41.2  | 39.0  |
|   | 155.3 | 30.6  | 153.4 | 30.3  | 154.3 | 29.9  | 30.4  |
|   | 112.7 | 71.5  | 110.0 | 70.8  | 110.5 | 71.3  | 78.2  |
|   | 156.9 | 29.1  | 155.4 | 28.5  | 155.9 | 28.4  | 29.3  |
|   | 155.7 | 30.2  | 152.7 | 31.1  | 154.3 | 29.9  | 30.6  |
|   | 118.1 | 66.3  | 116.6 | 64.6  | 116.9 | 65.3  | 66.9  |
|   | 169.4 | 17.1  | 168.3 | 16.5  | 168.8 | 16.2  | 17.3  |
|   | 82.4  | 100.6 | 80.1  | 98.6  | 80.6  | 99.6  | 102.5 |
|   | 114.6 | 69.7  | 111.4 | 69.5  | 112.7 | 69.3  | 71.8  |
|   | 107.7 | 76.3  | 104.9 | 75.5  | 106.1 | 75.4  | 78.2  |
|   | 108.5 | 75.6  | 105.5 | 74.9  | 106.6 | 75.0  | 78.2  |
|   | 112.3 | 71.9  | 109.4 | 71.4  | 110.4 | 71.4  | 75.5  |
|   | 120.5 | 64.1  | 119.1 | 62.3  | 120.2 | 62.1  | 62.7  |
| 9 | 147.2 | 38.4  | 142.8 | 40.3  | 143.9 | 39.8  | 40.1  |
|   | 124.9 | 59.8  | 121.4 | 60.1  | 122.0 | 60.5  | 60.9  |
|   | 143.2 | 42.2  | 138.5 | 44.2  | 139.7 | 43.7  | 44.0  |
|   | 134.7 | 50.3  | 131.4 | 50.8  | 131.9 | 51.1  | 51.6  |
|   | 168.5 | 17.9  | 165.8 | 18.8  | 166.7 | 18.2  | 17.3  |
|   | 148.5 | 37.1  | 146.2 | 37.0  | 146.7 | 37.1  | 37.4  |
|   | 109.6 | 74.5  | 106.9 | 73.7  | 107.2 | 74.4  | 76.1  |
|   | 146.2 | 39.4  | 143.6 | 39.5  | 144.1 | 39.6  | 37.9  |
|   | 132.3 | 52.7  | 127.6 | 54.4  | 128.4 | 54.4  | 53.5  |
|   | 145.9 | 39.6  | 141.9 | 41.1  | 142.5 | 41.1  | 38.5  |
|   | 138.2 | 47.0  | 134.7 | 47.7  | 135.2 | 48.0  | 42.6  |
|   | 157.8 | 28.2  | 153.2 | 30.5  | 154.5 | 29.7  | 30.0  |
|   | 148.1 | 37.5  | 146.0 | 37.3  | 146.5 | 37.3  | 37.3  |
|   | 157.9 | 28.1  | 155.5 | 28.4  | 155.8 | 28.5  | 32.1  |
|   | 154.9 | 31.0  | 152.7 | 31.0  | 152.9 | 31.3  | 35.5  |
|   | 160.5 | 25.6  | 156.2 | 27.8  | 157.8 | 26.6  | 27.8  |
|   | 152.9 | 32.9  | 150.7 | 32.9  | 151.4 | 32.7  | 32.2  |
|   | 155.0 | 30.9  | 152.7 | 31.0  | 153.4 | 30.7  | 35.0  |
|   | 152.8 | 33.0  | 149.9 | 33.6  | 151.0 | 33.0  | 31.1  |
|   | 117.4 | 67.0  | 113.7 | 67.3  | 115.1 | 66.9  | 68.7  |
|   | 1.9   | 177.8 | -3.9  | 176.9 | -0.7  | 176.4 | 176.8 |
|   | 102.4 | 81.4  | 99.2  | 80.9  | 99.7  | 81.5  | 83.8  |
|   | 170.3 | 16.2  | 169.1 | 15.8  | 169.8 | 15.3  | 15.5  |
|   | 173.6 | 13.0  | 172.0 | 13.1  | 172.3 | 12.9  | 12.8  |
|   | 170.9 | 15.6  | 169.0 | 15.8  | 169.5 | 15.5  | 13.1  |
|   | 168.9 | 17.5  | 167.2 | 17.5  | 167.6 | 17.3  | 21.5  |
|   | 149.3 | 36.3  | 148.1 | 35.3  | 148.3 | 35.6  | 30.6  |
|   | 153.3 | 32.6  | 152.2 | 31.5  | 152.4 | 31.7  | 30.0  |
|   | 150.6 | 35.1  | 149.5 | 34.0  | 149.7 | 34.2  | 34.1  |

|           |       |       |       |       |       |       |       |
|-----------|-------|-------|-------|-------|-------|-------|-------|
|           | -0.7  | 180.4 | -5.4  | 178.2 | -3.0  | 178.6 | 178.0 |
| <b>10</b> | 130.5 | 54.4  | 127.5 | 54.5  | 128.1 | 54.7  | 57.9  |
|           | 161.7 | 24.5  | 159.6 | 24.6  | 160.1 | 24.4  | 25.2  |
|           | 151.9 | 33.9  | 148.9 | 34.5  | 150.5 | 33.5  | 30.5  |
|           | 143.8 | 41.7  | 141.8 | 41.2  | 142.5 | 41.0  | 44.1  |
|           | 137.8 | 47.4  | 134.9 | 47.6  | 135.5 | 47.7  | 50.5  |
|           | 72.7  | 109.9 | 67.2  | 110.6 | 68.9  | 110.6 | 110.6 |
|           | 9.4   | 170.6 | 4.7   | 168.8 | 7.3   | 168.9 | 171.3 |
|           | 111.8 | 72.3  | 109.0 | 71.7  | 109.9 | 71.8  | 71.7  |
|           | 146.9 | 38.7  | 144.0 | 39.1  | 145.1 | 38.6  | 40.8  |
|           | 138.4 | 46.9  | 136.1 | 46.5  | 136.6 | 46.6  | 42.6  |
|           | 138.1 | 47.1  | 135.6 | 47.0  | 136.2 | 47.0  | 47.1  |
|           | 2.3   | 177.5 | -2.1  | 175.2 | 0.5   | 175.3 | 174.9 |
|           | 49.5  | 132.2 | 43.5  | 132.7 | 46.1  | 132.2 | 134.1 |
|           | 41.3  | 140.0 | 37.0  | 138.8 | 38.6  | 139.3 | 130.6 |
|           | 144.2 | 41.2  | 142.5 | 40.5  | 143.2 | 40.4  | 42.1  |
|           | 56.0  | 126.0 | 48.7  | 127.9 | 50.6  | 127.9 | 128.5 |
|           | 3.5   | 176.3 | -1.6  | 174.7 | 1.3   | 174.5 | 177.9 |
|           | 163.0 | 23.2  | 162.4 | 22.0  | 162.7 | 22.0  | 22.0  |
|           | 155.6 | 30.3  | 154.7 | 29.2  | 154.7 | 29.5  | 31.1  |
|           | 46.8  | 134.8 | 40.9  | 135.1 | 42.7  | 135.4 | 132.7 |
|           | 56.4  | 125.6 | 52.5  | 124.3 | 54.1  | 124.6 | 124.2 |
|           | 46.7  | 134.8 | 40.1  | 135.9 | 42.3  | 135.8 | 138.1 |
|           | 166.2 | 20.1  | 165.2 | 19.3  | 166.1 | 18.8  | 19.6  |
|           | 174.1 | 12.6  | 172.9 | 12.2  | 173.4 | 11.9  | 20.0  |
|           | 6.9   | 173.0 | 2.6   | 170.8 | 5.7   | 170.4 | 172.1 |
|           | 169.5 | 17.0  | 168.7 | 16.2  | 169.3 | 15.7  | 18.5  |
|           | 166.2 | 20.1  | 164.2 | 20.3  | 164.8 | 20.0  | 18.2  |
|           | 62.0  | 120.2 | 57.1  | 120.0 | 58.8  | 120.2 | 119.3 |
|           | 70.9  | 111.7 | 66.8  | 111.0 | 68.2  | 111.3 | 112.3 |
|           | 52.0  | 129.8 | 46.2  | 130.2 | 48.3  | 130.1 | 128.2 |
|           | 54.0  | 127.8 | 48.1  | 128.4 | 50.3  | 128.2 | 128.2 |
|           | 62.4  | 119.8 | 57.3  | 119.8 | 59.3  | 119.7 | 119.8 |
|           | 60.0  | 122.1 | 55.1  | 121.9 | 57.0  | 121.9 | 122.4 |
|           | 69.0  | 113.4 | 63.6  | 113.9 | 65.5  | 113.8 | 116.2 |
|           | 67.7  | 114.7 | 62.6  | 114.9 | 64.2  | 115.1 | 116.2 |
|           | 24.8  | 155.9 | 17.2  | 157.2 | 20.9  | 156.0 | 157.7 |
| <b>11</b> | 135.1 | 50.0  | 132.4 | 49.9  | 133.4 | 49.7  | 49.4  |
|           | 17.5  | 162.9 | 12.4  | 161.6 | 14.1  | 162.4 | 169.4 |
|           | 68.0  | 114.4 | 60.9  | 116.5 | 63.2  | 116.0 | 106.6 |
|           | 41.8  | 139.6 | 34.5  | 141.1 | 37.1  | 140.7 | 141.5 |
|           | 153.0 | 32.8  | 151.0 | 32.6  | 151.5 | 32.6  | 36.9  |
|           | 21.2  | 159.4 | 14.5  | 159.7 | 17.9  | 158.8 | 165.3 |
|           | 65.0  | 117.3 | 58.8  | 118.5 | 60.4  | 118.7 | 124.5 |
|           | 23.6  | 157.0 | 17.1  | 157.3 | 20.6  | 156.3 | 158.1 |
|           | 73.3  | 109.3 | 69.0  | 108.9 | 69.8  | 109.8 | 117.3 |
|           | 59.6  | 122.5 | 53.3  | 123.6 | 55.0  | 123.8 | 124.4 |
|           | 44.0  | 137.5 | 39.4  | 136.5 | 40.7  | 137.3 | 134.8 |
|           | 62.3  | 119.9 | 56.0  | 121.0 | 58.0  | 121.0 | 120.6 |
|           | 31.1  | 149.8 | 25.9  | 149.1 | 27.9  | 149.4 | 151.8 |

|    |       |       |       |       |       |       |       |
|----|-------|-------|-------|-------|-------|-------|-------|
|    | 72.9  | 109.7 | 65.8  | 111.9 | 67.6  | 111.9 | 115.2 |
|    | 49.2  | 132.5 | 42.0  | 134.1 | 44.1  | 134.1 | 137.2 |
|    | 63.5  | 118.7 | 58.3  | 118.9 | 59.4  | 119.6 | 120.5 |
|    | 43.5  | 137.9 | 36.5  | 139.2 | 39.1  | 138.8 | 136.9 |
|    | 77.6  | 105.2 | 71.9  | 106.2 | 73.3  | 106.5 | 107.9 |
|    | 24.7  | 155.9 | 18.6  | 155.9 | 20.6  | 156.3 | 157.8 |
|    | 62.3  | 119.9 | 55.6  | 121.4 | 57.7  | 121.2 | 120.6 |
|    | 47.8  | 133.8 | 43.3  | 132.9 | 44.8  | 133.4 | 135.0 |
|    | 55.5  | 126.4 | 49.4  | 127.2 | 50.7  | 127.8 | 124.5 |
|    | 47.0  | 134.6 | 39.8  | 136.2 | 41.7  | 136.4 | 136.6 |
|    | 69.1  | 113.3 | 61.7  | 115.8 | 63.4  | 115.8 | 114.9 |
|    | 28.3  | 152.5 | 22.6  | 152.1 | 24.9  | 152.3 | 152.5 |
|    | 22.0  | 158.5 | 15.7  | 158.6 | 17.9  | 158.8 | 157.8 |
|    | 78.5  | 104.3 | 72.4  | 105.7 | 73.7  | 106.1 | 107.7 |
|    | 43.4  | 138.0 | 36.5  | 139.2 | 39.1  | 138.8 | 136.8 |
|    | 66.5  | 115.8 | 61.2  | 116.2 | 62.5  | 116.7 | 119.3 |
|    | 64.2  | 118.1 | 58.2  | 119.0 | 59.8  | 119.3 | 118.9 |
|    | 26.4  | 154.3 | 20.4  | 154.2 | 23.9  | 153.2 | 155.9 |
|    | 85.6  | 97.5  | 81.7  | 97.1  | 82.7  | 97.6  | 101.7 |
|    | 27.6  | 153.2 | 20.9  | 153.7 | 24.3  | 152.8 | 155.5 |
|    | 67.6  | 114.8 | 60.8  | 116.6 | 62.4  | 116.8 | 116.4 |
|    | 42.8  | 138.6 | 35.7  | 139.9 | 38.4  | 139.5 | 134.7 |
|    | 151.6 | 34.2  | 149.6 | 33.9  | 149.2 | 34.7  | 34.7  |
|    | 144.4 | 41.1  | 141.8 | 41.2  | 142.7 | 40.9  | 44.0  |
|    | 138.9 | 46.4  | 136.8 | 45.8  | 136.9 | 46.4  | 48.9  |
|    | 170.9 | 15.6  | 170.3 | 14.7  | 170.5 | 14.6  | 19.2  |
|    | 124.4 | 60.3  | 123.5 | 58.2  | 123.6 | 59.0  | 61.0  |
|    | 163.9 | 22.4  | 163.0 | 21.4  | 163.1 | 21.6  | 22.1  |
|    | 130.4 | 54.5  | 129.1 | 53.0  | 129.5 | 53.4  | 56.9  |
|    | 131.3 | 53.6  | 130.0 | 52.2  | 130.3 | 52.6  | 56.9  |
|    | 164.1 | 22.1  | 163.3 | 21.2  | 163.3 | 21.4  | 22.2  |
|    | 165.8 | 20.5  | 164.7 | 19.8  | 165.2 | 19.7  | 19.7  |
|    | 164.1 | 22.2  | 163.5 | 21.0  | 163.8 | 20.9  | 20.8  |
| 12 | 123.9 | 60.7  | 118.5 | 62.8  | 119.5 | 62.8  | 65.7  |
|    | 133.8 | 51.3  | 128.3 | 53.8  | 129.7 | 53.1  | 51.3  |
|    | 136.9 | 48.3  | 133.6 | 48.8  | 133.8 | 49.3  | 48.1  |
|    | 141.0 | 44.3  | 135.2 | 47.3  | 136.7 | 46.5  | 45.9  |
|    | 149.1 | 36.5  | 144.1 | 39.0  | 145.9 | 37.9  | 37.9  |
|    | 133.4 | 51.6  | 130.3 | 51.9  | 131.7 | 51.3  | 53.9  |
|    | 124.5 | 60.1  | 121.0 | 60.5  | 121.9 | 60.6  | 60.6  |
|    | 167.0 | 19.4  | 164.4 | 20.1  | 165.6 | 19.2  | 18.9  |
|    | 150.9 | 34.8  | 149.3 | 34.2  | 149.6 | 34.3  | 30.8  |
|    | 105.3 | 78.6  | 102.6 | 77.6  | 103.4 | 78.0  | 79.1  |
|    | -32.7 | 211.0 | -37.8 | 208.4 | -36.1 | 209.9 | 206.1 |
|    | 148.5 | 37.2  | 145.4 | 37.8  | 146.6 | 37.2  | 36.4  |
|    | 105.2 | 78.7  | 101.1 | 79.1  | 102.6 | 78.8  | 80.3  |
|    | 108.6 | 75.5  | 105.4 | 75.1  | 105.7 | 75.9  | 77.8  |
|    | 170.0 | 16.5  | 167.7 | 17.0  | 168.4 | 16.6  | 17.6  |
|    | 119.9 | 64.6  | 117.0 | 64.3  | 117.3 | 64.9  | 65.3  |
|    | 164.5 | 21.8  | 163.0 | 21.5  | 163.4 | 21.3  | 21.4  |

|    |       |       |       |       |       |       |       |
|----|-------|-------|-------|-------|-------|-------|-------|
|    | 13.2  | 167.1 | 7.5   | 166.2 | 10.2  | 166.1 | 166.6 |
|    | 150.1 | 35.6  | 147.7 | 35.7  | 148.6 | 35.3  | 35.6  |
|    | 166.5 | 19.9  | 165.2 | 19.4  | 165.4 | 19.4  | 20.7  |
|    | 157.3 | 28.7  | 156.2 | 27.7  | 156.6 | 27.8  | 30.2  |
|    | 60.8  | 121.3 | 53.8  | 123.1 | 56.1  | 122.7 | 120.0 |
|    | 11.0  | 169.1 | 5.1   | 168.4 | 8.0   | 168.2 | 169.1 |
|    | 69.8  | 112.7 | 64.8  | 112.9 | 66.8  | 112.7 | 109.7 |
|    | 40.6  | 140.7 | 35.1  | 140.5 | 37.6  | 140.2 | 141.1 |
|    | 38.0  | 143.2 | 32.2  | 143.2 | 34.9  | 142.8 | 143.2 |
| 13 | 122.1 | 62.5  | 119.6 | 61.9  | 119.3 | 63.0  | 62.9  |
|    | 134.9 | 50.2  | 129.4 | 52.7  | 131.1 | 51.8  | 53.5  |
|    | 142.2 | 43.2  | 139.4 | 43.4  | 140.8 | 42.7  | 41.4  |
|    | 98.9  | 84.7  | 97.0  | 82.8  | 97.2  | 83.9  | 82.7  |
|    | 120.9 | 63.6  | 118.4 | 62.9  | 118.4 | 63.8  | 65.4  |
|    | 158.9 | 27.2  | 155.6 | 28.3  | 156.5 | 27.8  | 29.2  |
|    | 161.7 | 24.5  | 159.4 | 24.8  | 160.1 | 24.4  | 23.3  |
|    | 144.8 | 40.7  | 142.8 | 40.2  | 143.4 | 40.2  | 37.3  |
|    | 38.5  | 142.8 | 31.1  | 144.2 | 33.4  | 144.2 | 133.9 |
|    | 29.5  | 151.3 | 22.4  | 152.3 | 25.2  | 152.0 | 146.5 |
|    | 126.9 | 57.8  | 125.6 | 56.3  | 125.6 | 57.0  | 53.8  |
|    | 31.5  | 149.5 | 24.2  | 150.6 | 26.8  | 150.5 | 141.5 |
|    | 126.8 | 58.0  | 125.0 | 56.8  | 124.8 | 57.8  | 52.0  |
|    | 59.7  | 122.4 | 54.4  | 122.5 | 56.4  | 122.5 | 122.7 |
|    | 74.5  | 108.2 | 69.5  | 108.5 | 71.3  | 108.4 | 103.8 |
|    | 61.1  | 121.0 | 57.3  | 119.9 | 59.4  | 119.6 | 117.7 |
|    | 62.4  | 119.8 | 57.0  | 120.1 | 59.1  | 119.9 | 117.2 |
|    | 55.3  | 126.6 | 49.5  | 127.1 | 51.7  | 126.9 | 128.2 |
|    | 170.6 | 16.0  | 169.7 | 15.1  | 170.2 | 14.9  | 13.3  |
| 14 | 150.9 | 34.9  | 146.8 | 36.5  | 147.6 | 36.2  | 35.1  |
|    | 158.1 | 27.9  | 154.4 | 29.5  | 155.3 | 28.9  | 28.5  |
|    | 151.4 | 34.3  | 148.1 | 35.3  | 148.7 | 35.2  | 37.2  |
|    | 84.0  | 99.1  | 80.4  | 98.3  | 80.7  | 99.5  | 102.6 |
|    | 151.2 | 34.5  | 148.6 | 34.8  | 149.0 | 34.9  | 36.2  |
|    | 66.7  | 115.7 | 59.3  | 118.0 | 61.6  | 117.6 | 116.8 |
|    | 72.6  | 110.0 | 66.2  | 111.6 | 67.5  | 112.0 | 117.5 |
|    | 62.6  | 119.6 | 57.5  | 119.7 | 59.9  | 119.1 | 122.9 |
|    | 40.5  | 140.8 | 33.5  | 142.0 | 36.6  | 141.1 | 133.7 |
|    | 69.2  | 113.2 | 62.3  | 115.2 | 64.5  | 114.8 | 113.4 |
|    | 28.3  | 152.5 | 21.5  | 153.2 | 24.2  | 152.9 | 154.5 |
|    | 27.7  | 153.1 | 20.9  | 153.7 | 23.8  | 153.3 | 155.0 |
|    | 25.0  | 155.7 | 17.8  | 156.6 | 21.0  | 155.9 | 156.7 |
|    | 54.0  | 127.9 | 47.7  | 128.7 | 49.9  | 128.6 | 127.9 |
|    | 161.5 | 24.7  | 160.7 | 23.6  | 160.9 | 23.7  | 23.9  |
|    | 77.2  | 105.5 | 73.0  | 105.2 | 73.4  | 106.4 | 105.0 |
|    | 81.5  | 101.5 | 77.1  | 101.5 | 78.2  | 101.9 | 104.6 |
|    | 23.7  | 156.9 | 16.9  | 157.5 | 20.3  | 156.5 | 159.9 |
|    | 50.0  | 131.7 | 43.9  | 132.3 | 46.2  | 132.1 | 130.3 |
|    | 79.4  | 103.5 | 75.1  | 103.2 | 76.2  | 103.8 | 105.4 |
|    | 53.1  | 128.7 | 46.7  | 129.7 | 48.5  | 130.0 | 131.1 |
|    | 75.8  | 107.0 | 71.2  | 106.9 | 72.7  | 107.0 | 109.9 |

|           |       |       |       |       |       |       |       |
|-----------|-------|-------|-------|-------|-------|-------|-------|
|           | 24.3  | 156.3 | 17.0  | 157.3 | 20.9  | 156.0 | 157.9 |
|           | 82.1  | 100.9 | 77.4  | 101.1 | 78.4  | 101.7 | 103.9 |
|           | 77.7  | 105.1 | 72.9  | 105.3 | 74.4  | 105.5 | 107.1 |
|           | 22.2  | 158.4 | 14.7  | 159.5 | 18.6  | 158.2 | 157.7 |
|           | 27.7  | 153.1 | 20.7  | 153.9 | 23.2  | 153.9 | 156.7 |
|           | 80.4  | 102.5 | 76.1  | 102.3 | 77.4  | 102.6 | 102.2 |
|           | 61.3  | 120.8 | 53.8  | 123.1 | 56.3  | 122.6 | 122.5 |
|           | 27.3  | 153.5 | 19.5  | 155.0 | 22.3  | 154.7 | 153.3 |
|           | 59.2  | 122.9 | 54.8  | 122.2 | 56.4  | 122.5 | 122.0 |
|           | 87.4  | 95.8  | 83.9  | 95.1  | 84.7  | 95.7  | 98.4  |
|           | 71.1  | 111.5 | 66.0  | 111.7 | 67.9  | 111.5 | 113.4 |
|           | 25.8  | 154.9 | 18.3  | 156.2 | 22.0  | 155.0 | 157.5 |
| <b>15</b> | 142.5 | 42.9  | 139.1 | 43.6  | 140.2 | 43.3  | 45.9  |
|           | 90.6  | 92.7  | 87.4  | 91.8  | 87.9  | 92.7  | 89.4  |
|           | 96.5  | 87.0  | 92.7  | 86.8  | 93.2  | 87.6  | 84.6  |
|           | 139.0 | 46.3  | 135.6 | 46.9  | 136.8 | 46.5  | 46.8  |
|           | 97.8  | 85.8  | 94.3  | 85.4  | 94.8  | 86.1  | 76.5  |
|           | 173.6 | 13.1  | 172.4 | 12.6  | 172.9 | 12.3  | 12.1  |
|           | 8.5   | 171.5 | 3.6   | 169.9 | 6.1   | 170.0 | 170.5 |
|           | 52.6  | 129.2 | 45.0  | 131.3 | 47.2  | 131.2 | 130.0 |
|           | 49.4  | 132.3 | 43.5  | 132.7 | 45.5  | 132.7 | 130.0 |
|           | 51.7  | 130.1 | 46.1  | 130.3 | 48.2  | 130.2 | 128.5 |
|           | 48.6  | 133.0 | 43.0  | 133.1 | 45.2  | 133.1 | 133.1 |
|           | 8.4   | 171.6 | 3.0   | 170.4 | 6.1   | 170.1 | 169.7 |
|           | 161.0 | 25.2  | 160.0 | 24.2  | 160.6 | 24.0  | 20.6  |
|           | 8.7   | 171.3 | 3.9   | 169.6 | 7.1   | 169.1 | 166.2 |
|           | 163.5 | 22.7  | 163.0 | 21.5  | 163.4 | 21.3  | 22.1  |
|           | 108.6 | 75.4  | 105.0 | 75.4  | 105.6 | 76.0  | 71.2  |
|           | 50.2  | 131.5 | 44.5  | 131.8 | 46.7  | 131.7 | 133.9 |
|           | 160.8 | 25.3  | 159.9 | 24.3  | 160.1 | 24.4  | 20.5  |
|           | 47.3  | 134.3 | 42.9  | 133.2 | 44.6  | 133.6 | 124.1 |
|           | 7.2   | 172.8 | 2.0   | 171.4 | 5.0   | 171.1 | 169.0 |
|           | 166.0 | 20.3  | 164.8 | 19.8  | 165.4 | 19.4  | 13.7  |
|           | 147.2 | 38.4  | 145.3 | 37.9  | 145.2 | 38.5  | 39.9  |
|           | 150.1 | 35.6  | 146.0 | 37.2  | 147.3 | 36.5  | 39.2  |
|           | 97.3  | 86.3  | 94.5  | 85.2  | 95.1  | 85.9  | 74.3  |
|           | 160.6 | 25.5  | 159.3 | 24.9  | 159.8 | 24.7  | 24.1  |
|           | 159.3 | 26.8  | 158.0 | 26.0  | 158.2 | 26.3  | 25.5  |
|           | 9.4   | 170.7 | 3.7   | 169.7 | 7.1   | 169.1 | 170.0 |
|           | 166.7 | 19.6  | 165.6 | 19.1  | 166.3 | 18.6  | 15.2  |
|           | 100.7 | 83.0  | 97.3  | 82.6  | 97.9  | 83.2  | 74.1  |
|           | -25.2 | 203.9 | -30.1 | 201.2 | -27.2 | 201.5 | 197.5 |
|           | 40.4  | 140.9 | 35.1  | 140.5 | 37.7  | 140.2 | 132.1 |
|           | 11.3  | 168.9 | 5.7   | 167.9 | 8.5   | 167.7 | 170.2 |
|           | 165.7 | 20.6  | 164.6 | 19.9  | 165.3 | 19.5  | 20.5  |
|           | 36.9  | 144.2 | 32.1  | 143.3 | 34.0  | 143.6 | 136.9 |
|           | 161.5 | 24.6  | 160.8 | 23.4  | 161.0 | 23.6  | 20.5  |
| <b>16</b> | 12.4  | 167.8 | 7.3   | 166.4 | 10.1  | 166.2 | 169.3 |
|           | 56.5  | 125.5 | 49.9  | 126.7 | 51.9  | 126.8 | 125.3 |
|           | 122.2 | 62.4  | 120.9 | 60.6  | 121.6 | 60.9  | 63.9  |

|    |       |       |       |       |       |       |       |
|----|-------|-------|-------|-------|-------|-------|-------|
|    | 117.0 | 67.3  | 114.4 | 66.7  | 115.0 | 67.1  | 66.8  |
|    | 116.5 | 67.8  | 113.6 | 67.4  | 114.4 | 67.6  | 69.5  |
|    | 91.6  | 91.7  | 89.2  | 90.1  | 90.4  | 90.3  | 90.7  |
|    | 108.5 | 75.6  | 105.8 | 74.7  | 106.9 | 74.7  | 76.9  |
|    | 110.0 | 74.1  | 107.3 | 73.3  | 108.0 | 73.7  | 75.0  |
|    | 11.1  | 169.0 | 6.2   | 167.5 | 8.6   | 167.6 | 169.6 |
|    | 57.9  | 124.1 | 51.6  | 125.1 | 53.3  | 125.4 | 124.8 |
|    | 74.8  | 107.9 | 70.3  | 107.7 | 71.4  | 108.3 | 107.7 |
|    | 37.7  | 143.5 | 31.1  | 144.2 | 34.6  | 143.1 | 145.1 |
|    | 45.0  | 136.5 | 38.0  | 137.8 | 41.4  | 136.6 | 136.3 |
|    | 40.4  | 140.9 | 34.6  | 141.0 | 37.2  | 140.7 | 144.2 |
|    | 67.4  | 115.0 | 60.2  | 117.1 | 62.8  | 116.4 | 115.0 |
|    | 10.3  | 169.8 | 5.4   | 168.2 | 7.8   | 168.4 | 170.5 |
|    | 56.8  | 125.1 | 50.5  | 126.1 | 52.1  | 126.5 | 125.1 |
|    | 69.3  | 113.2 | 62.8  | 114.7 | 65.0  | 114.4 | 113.7 |
|    | 41.1  | 140.2 | 35.0  | 140.6 | 38.1  | 139.8 | 144.1 |
|    | 49.4  | 132.3 | 42.6  | 133.6 | 45.9  | 132.4 | 135.9 |
|    | 40.0  | 141.3 | 33.4  | 142.1 | 36.7  | 141.0 | 145.1 |
|    | 76.7  | 106.0 | 72.6  | 105.6 | 73.3  | 106.5 | 107.2 |
|    | 10.7  | 169.4 | 5.9   | 167.7 | 8.7   | 167.6 | 170.0 |
|    | 57.2  | 124.8 | 50.8  | 125.9 | 52.3  | 126.3 | 125.2 |
|    | 74.7  | 108.0 | 70.5  | 107.6 | 71.4  | 108.3 | 108.3 |
|    | 37.5  | 143.7 | 30.9  | 144.5 | 34.4  | 143.3 | 145.1 |
|    | 45.7  | 135.9 | 38.7  | 137.1 | 42.2  | 135.9 | 136.0 |
|    | 40.4  | 140.9 | 34.6  | 141.0 | 37.2  | 140.6 | 144.2 |
|    | 66.5  | 115.8 | 59.6  | 117.7 | 62.2  | 117.0 | 115.1 |
|    | 67.5  | 114.9 | 60.9  | 116.5 | 63.2  | 116.0 | 113.9 |
|    | 40.8  | 140.5 | 34.7  | 140.9 | 37.7  | 140.2 | 144.1 |
|    | 49.3  | 132.4 | 42.5  | 133.6 | 45.7  | 132.5 | 136.0 |
|    | 39.9  | 141.4 | 33.3  | 142.2 | 36.6  | 141.1 | 145.1 |
|    | 75.9  | 106.8 | 71.7  | 106.4 | 72.5  | 107.2 | 107.2 |
| 17 | 117.8 | 66.6  | 114.8 | 66.3  | 116.2 | 65.9  | 70.8  |
|    | 109.3 | 74.7  | 106.2 | 74.3  | 107.2 | 74.4  | 78.9  |
|    | 94.2  | 89.3  | 91.4  | 88.0  | 92.0  | 88.8  | 93.7  |
|    | 106.6 | 77.4  | 103.9 | 76.4  | 104.7 | 76.8  | 83.1  |
|    | 112.0 | 72.2  | 108.5 | 72.1  | 109.4 | 72.4  | 77.8  |
|    | 87.5  | 95.6  | 85.1  | 94.0  | 85.4  | 95.0  | 105.9 |
|    | 111.1 | 73.0  | 107.7 | 72.9  | 108.9 | 72.9  | 77.6  |
|    | 113.7 | 70.5  | 111.0 | 69.8  | 112.3 | 69.6  | 70.7  |
|    | 108.4 | 75.6  | 105.6 | 74.9  | 106.7 | 74.9  | 77.7  |
|    | 111.2 | 72.9  | 109.0 | 71.7  | 109.9 | 71.9  | 75.9  |
|    | 3.6   | 176.2 | -1.3  | 174.4 | 1.7   | 174.1 | 175.8 |
|    | 152.0 | 33.7  | 148.8 | 34.6  | 150.3 | 33.7  | 32.2  |
|    | 152.8 | 33.0  | 150.7 | 32.9  | 151.4 | 32.6  | 32.2  |
|    | 111.0 | 73.1  | 108.5 | 72.1  | 109.3 | 72.4  | 71.5  |
|    | 112.5 | 71.7  | 107.0 | 73.6  | 109.1 | 72.6  | 75.4  |
|    | 110.8 | 73.3  | 107.3 | 73.3  | 108.4 | 73.3  | 76.3  |
|    | 157.9 | 28.1  | 155.9 | 28.1  | 156.5 | 27.8  | 29.3  |
|    | 85.0  | 98.0  | 79.9  | 98.8  | 80.9  | 99.3  | 100.5 |
|    | -39.1 | 217.2 | -45.6 | 215.6 | -43.1 | 216.6 | 213.7 |

|  |       |       |       |       |       |       |       |
|--|-------|-------|-------|-------|-------|-------|-------|
|  | 154.7 | 31.2  | 152.3 | 31.4  | 153.7 | 30.5  | 32.7  |
|  | 115.5 | 68.8  | 112.7 | 68.3  | 113.2 | 68.7  | 70.9  |
|  | 156.3 | 29.6  | 153.6 | 30.2  | 155.2 | 29.1  | 34.3  |
|  | 118.8 | 65.7  | 117.4 | 63.9  | 117.6 | 64.6  | 63.4  |
|  | 172.6 | 14.0  | 171.9 | 13.2  | 172.2 | 13.0  | 13.1  |
|  | 14.7  | 165.6 | 9.9   | 164.0 | 12.4  | 164.0 | 167.8 |
|  | 53.6  | 128.2 | 45.6  | 130.7 | 48.5  | 129.9 | 132.1 |
|  | 51.1  | 130.6 | 45.3  | 131.0 | 47.1  | 131.3 | 130.8 |
|  | 52.7  | 129.1 | 46.9  | 129.5 | 49.0  | 129.4 | 129.9 |
|  | 46.8  | 134.7 | 41.1  | 134.9 | 43.2  | 134.9 | 134.4 |
|  | 52.7  | 129.1 | 47.1  | 129.4 | 49.2  | 129.3 | 129.9 |
|  | 51.4  | 130.4 | 45.8  | 130.6 | 47.7  | 130.7 | 130.8 |
|  | 120.7 | 63.8  | 119.0 | 62.4  | 120.1 | 62.3  | 62.0  |
|  | 123.5 | 61.1  | 122.2 | 59.4  | 123.3 | 59.2  | 62.3  |
|  | 18    | 28.1  | 152.7 | 23.7  | 151.1 | 25.8  | 151.4 |
|  | 148.5 | 37.1  | 146.0 | 37.2  | 146.9 | 36.9  | 35.1  |
|  | 108.5 | 75.5  | 104.1 | 76.3  | 105.0 | 76.6  | 76.3  |
|  | 130.0 | 54.9  | 124.4 | 57.3  | 126.0 | 56.6  | 53.4  |
|  | -32.9 | 211.3 | -38.6 | 209.1 | -36.2 | 210.0 | 204.3 |
|  | 51.7  | 130.0 | 46.9  | 129.5 | 48.9  | 129.6 | 127.1 |
|  | 109.8 | 74.3  | 107.7 | 72.9  | 108.5 | 73.2  | 72.3  |
|  | 158.8 | 27.2  | 156.6 | 27.4  | 157.4 | 27.0  | 26.6  |
|  | 150.7 | 35.0  | 147.5 | 35.8  | 148.2 | 35.6  | 38.2  |
|  | 155.1 | 30.8  | 151.0 | 32.6  | 152.1 | 32.0  | 29.8  |
|  | 79.8  | 103.1 | 76.3  | 102.1 | 76.4  | 103.5 | 106.8 |
|  | -27.2 | 205.8 | -31.6 | 202.6 | -30.0 | 204.2 | 209.8 |
|  | 127.6 | 57.2  | 123.5 | 58.2  | 124.0 | 58.5  | 53.8  |
|  | 102.9 | 80.9  | 98.2  | 81.7  | 98.9  | 82.2  | 80.4  |
|  | 105.3 | 78.6  | 100.5 | 79.6  | 101.8 | 79.5  | 78.5  |
|  | 161.0 | 25.2  | 158.3 | 25.8  | 159.5 | 25.0  | 25.7  |
|  | 160.8 | 25.3  | 158.5 | 25.6  | 159.1 | 25.4  | 24.7  |
|  | 155.3 | 30.6  | 150.6 | 33.0  | 152.3 | 31.8  | 30.4  |
|  | 133.3 | 51.7  | 130.3 | 51.9  | 130.4 | 52.5  | 49.3  |
|  | 123.4 | 61.3  | 121.4 | 60.2  | 122.2 | 60.3  | 60.4  |
|  | 149.6 | 36.1  | 147.1 | 36.2  | 147.8 | 36.1  | 31.2  |
|  | 106.7 | 77.3  | 104.3 | 76.1  | 104.6 | 76.9  | 76.3  |
|  | 101.8 | 82.0  | 97.7  | 82.2  | 98.2  | 83.0  | 80.6  |
|  | 7.3   | 172.6 | 1.0   | 172.3 | 4.1   | 171.9 | 171.8 |
|  | 8.1   | 171.9 | 2.1   | 171.3 | 5.1   | 171.0 | 167.3 |
|  | 166.7 | 19.6  | 165.8 | 18.8  | 166.2 | 18.7  | 21.6  |
|  | 155.6 | 30.3  | 154.7 | 29.1  | 155.2 | 29.0  | 24.4  |
|  | 170.7 | 15.8  | 169.1 | 15.8  | 169.5 | 15.6  | 13.2  |
|  | 19    | 24.5  | 156.2 | 18.0  | 156.5 | 21.5  | 155.4 |
|  | 89.7  | 93.6  | 85.5  | 93.5  | 86.7  | 93.8  | 96.5  |
|  | 23.7  | 156.9 | 17.1  | 157.3 | 20.3  | 156.6 | 155.5 |
|  | 85.9  | 97.2  | 79.8  | 98.9  | 81.2  | 99.0  | 100.3 |
|  | 25.7  | 155.0 | 19.2  | 155.3 | 22.2  | 154.8 | 153.8 |
|  | 85.2  | 97.9  | 79.8  | 98.9  | 81.0  | 99.2  | 106.7 |
|  | 157.7 | 28.3  | 156.0 | 27.9  | 156.4 | 28.0  | 28.6  |
|  | 125.2 | 59.5  | 121.7 | 59.9  | 123.1 | 59.4  | 66.1  |

|    |       |       |       |       |       |       |       |
|----|-------|-------|-------|-------|-------|-------|-------|
|    | 108.9 | 75.1  | 105.6 | 74.9  | 106.2 | 75.4  | 79.0  |
|    | 53.5  | 128.4 | 47.2  | 129.2 | 48.8  | 129.7 | 130.4 |
|    | 69.4  | 113.1 | 64.2  | 113.5 | 65.3  | 114.0 | 115.8 |
|    | 58.9  | 123.2 | 53.6  | 123.3 | 55.5  | 123.3 | 120.3 |
|    | 69.0  | 113.5 | 64.6  | 113.1 | 65.8  | 113.6 | 115.1 |
|    | 39.8  | 141.5 | 32.8  | 142.7 | 36.2  | 141.6 | 145.1 |
|    | 38.4  | 142.8 | 31.3  | 144.0 | 34.7  | 142.9 | 145.1 |
|    | 154.2 | 31.7  | 150.9 | 32.7  | 151.4 | 32.7  | 36.5  |
|    | 117.3 | 67.1  | 114.2 | 66.8  | 115.2 | 66.9  | 72.6  |
|    | 82.5  | 100.5 | 76.3  | 102.2 | 77.8  | 102.2 | 100.3 |
|    | 23.8  | 156.8 | 17.4  | 157.0 | 20.5  | 156.4 | 155.6 |
|    | 105.7 | 78.3  | 103.2 | 77.1  | 103.6 | 77.9  | 76.6  |
|    | 22.7  | 157.8 | 16.4  | 157.9 | 19.4  | 157.4 | 158.0 |
|    | 89.1  | 94.2  | 85.5  | 93.5  | 86.5  | 94.0  | 96.3  |
|    | 23.4  | 157.3 | 17.3  | 157.1 | 20.4  | 156.5 | 157.2 |
|    | 88.9  | 94.3  | 85.8  | 93.3  | 86.2  | 94.2  | 95.9  |
|    | 52.5  | 129.3 | 45.9  | 130.4 | 47.2  | 131.1 | 132.0 |
|    | 65.6  | 116.7 | 60.2  | 117.1 | 62.3  | 116.9 | 119.0 |
|    | 69.7  | 112.8 | 64.9  | 112.8 | 66.1  | 113.2 | 115.1 |
|    | 37.7  | 143.5 | 30.4  | 144.9 | 34.1  | 143.5 | 145.1 |
|    | 69.3  | 113.1 | 64.5  | 113.1 | 66.0  | 113.4 | 115.3 |
|    | 39.4  | 141.8 | 32.5  | 143.0 | 35.9  | 141.8 | 145.1 |
| 20 | 123.5 | 61.1  | 121.0 | 60.5  | 121.1 | 61.3  | 60.1  |
|    | 159.4 | 26.7  | 157.1 | 26.9  | 157.7 | 26.7  | 26.9  |
|    | 154.0 | 31.9  | 150.3 | 33.2  | 151.3 | 32.7  | 31.7  |
|    | 138.5 | 46.8  | 134.2 | 48.2  | 135.3 | 47.8  | 48.2  |
|    | 123.4 | 61.2  | 120.1 | 61.4  | 119.8 | 62.5  | 60.1  |
|    | 37.7  | 143.5 | 30.3  | 145.0 | 33.1  | 144.4 | 142.2 |
|    | 64.6  | 117.6 | 59.2  | 118.0 | 60.7  | 118.4 | 116.3 |
|    | 52.0  | 129.8 | 46.1  | 130.2 | 48.3  | 130.1 | 128.8 |
|    | 57.1  | 124.9 | 51.3  | 125.4 | 53.3  | 125.4 | 124.4 |
|    | 58.2  | 123.8 | 52.6  | 124.3 | 54.5  | 124.3 | 122.8 |
|    | 46.6  | 135.0 | 39.1  | 136.8 | 41.2  | 136.8 | 132.9 |
|    | 134.3 | 50.8  | 129.3 | 52.8  | 130.7 | 52.2  | 52.3  |
|    | 141.7 | 43.7  | 140.2 | 42.6  | 140.8 | 42.7  | 42.7  |
|    | 134.4 | 50.6  | 133.1 | 49.2  | 133.4 | 49.6  | 50.3  |
|    | 132.9 | 52.1  | 131.1 | 51.1  | 131.1 | 51.8  | 52.9  |
|    | 33.0  | 148.0 | 25.6  | 149.4 | 27.8  | 149.5 | 140.0 |
|    | 49.0  | 132.7 | 45.3  | 131.0 | 47.0  | 131.3 | 127.9 |
|    | 120.0 | 64.5  | 118.5 | 62.8  | 118.7 | 63.6  | 64.8  |
|    | 106.3 | 77.6  | 103.6 | 76.7  | 104.2 | 77.2  | 77.6  |
|    | 141.6 | 43.7  | 139.6 | 43.2  | 140.5 | 42.9  | 42.8  |
|    | 8.7   | 171.3 | 3.1   | 170.3 | 5.6   | 170.5 | 170.3 |
| 21 | 54.0  | 127.9 | 48.1  | 128.4 | 50.4  | 128.2 | 128.0 |
|    | 56.6  | 125.4 | 50.8  | 125.9 | 53.0  | 125.7 | 125.3 |
|    | 59.1  | 123.0 | 53.7  | 123.1 | 55.7  | 123.1 | 122.3 |
|    | 38.4  | 142.8 | 30.9  | 144.5 | 33.4  | 144.2 | 137.4 |
|    | 41.4  | 139.9 | 34.5  | 141.1 | 37.1  | 140.7 | 141.4 |
|    | 65.7  | 116.6 | 60.5  | 116.9 | 62.0  | 117.2 | 117.9 |
|    | 132.3 | 52.6  | 126.6 | 55.3  | 128.5 | 54.3  | 52.8  |



|    |       |       |       |       |       |       |       |
|----|-------|-------|-------|-------|-------|-------|-------|
|    | 124.2 | 60.5  | 120.9 | 60.6  | 120.8 | 61.6  | 63.7  |
|    | 8.8   | 171.3 | 4.5   | 169.0 | 7.0   | 169.2 | 167.7 |
|    | 140.3 | 45.0  | 136.1 | 46.5  | 137.3 | 46.0  | 47.8  |
|    | 132.0 | 53.0  | 129.1 | 53.0  | 129.1 | 53.7  | 57.5  |
|    | 139.7 | 45.6  | 136.2 | 46.3  | 137.8 | 45.5  | 39.0  |
|    | 141.4 | 43.9  | 139.4 | 43.4  | 140.0 | 43.4  | 36.5  |
|    | 126.2 | 58.5  | 124.9 | 56.9  | 124.9 | 57.7  | 54.1  |
|    | 117.4 | 66.9  | 114.7 | 66.4  | 115.0 | 67.1  | 66.3  |
|    | 165.2 | 21.1  | 162.7 | 21.7  | 163.6 | 21.2  | 23.8  |
|    | 156.7 | 29.3  | 153.3 | 30.4  | 154.2 | 30.0  | 29.3  |
|    | 171.2 | 15.4  | 170.3 | 14.7  | 170.6 | 14.5  | 13.7  |
|    | 59.1  | 123.0 | 55.4  | 121.6 | 57.3  | 121.6 | 117.7 |
|    | 34.5  | 146.6 | 27.3  | 147.8 | 29.7  | 147.7 | 140.5 |
|    | 126.8 | 58.0  | 125.2 | 56.6  | 124.9 | 57.7  | 52.3  |
|    | 117.7 | 66.7  | 115.4 | 65.8  | 116.1 | 66.0  | 69.5  |
|    | 136.3 | 48.8  | 132.6 | 49.7  | 133.7 | 49.3  | 47.9  |
|    | 116.8 | 67.5  | 113.2 | 67.8  | 113.3 | 68.7  | 69.4  |
|    | 29.4  | 151.5 | 22.6  | 152.2 | 25.3  | 151.9 | 150.0 |
|    | 133.4 | 51.6  | 128.5 | 53.5  | 129.7 | 53.1  | 51.8  |
|    | 46.8  | 134.8 | 39.6  | 136.4 | 41.5  | 136.5 | 134.3 |
|    | 76.1  | 106.6 | 71.3  | 106.8 | 72.7  | 107.1 | 108.3 |
|    | 54.2  | 127.6 | 48.4  | 128.2 | 50.3  | 128.2 | 128.2 |
|    | 63.9  | 118.4 | 58.7  | 118.6 | 60.5  | 118.5 | 119.8 |
|    | 59.0  | 123.0 | 53.5  | 123.4 | 55.5  | 123.3 | 122.2 |
|    | 156.2 | 29.7  | 152.8 | 30.9  | 153.6 | 30.6  | 27.7  |
|    | 156.2 | 29.7  | 154.6 | 29.3  | 154.8 | 29.4  | 28.5  |
|    | 122.9 | 61.7  | 119.9 | 61.6  | 119.9 | 62.4  | 61.7  |
|    | 131.0 | 53.9  | 129.4 | 52.7  | 129.8 | 53.1  | 53.7  |
|    | 143.4 | 42.0  | 141.5 | 41.4  | 142.2 | 41.3  | 41.2  |
|    | 126.3 | 58.4  | 124.8 | 57.0  | 124.4 | 58.2  | 58.1  |
|    | 42.8  | 138.6 | 35.6  | 140.0 | 37.9  | 139.9 | 133.8 |
|    | 57.8  | 124.2 | 53.8  | 123.1 | 55.9  | 122.9 | 122.2 |
|    | 172.2 | 14.4  | 171.4 | 13.6  | 171.8 | 13.4  | 13.0  |
| 22 | 146.8 | 38.8  | 142.7 | 40.3  | 143.9 | 39.7  | 40.0  |
|    | 37.1  | 144.1 | 31.6  | 143.8 | 33.3  | 144.3 | 143.4 |
|    | 81.8  | 101.1 | 76.5  | 101.9 | 78.4  | 101.6 | 102.7 |
|    | 55.8  | 126.2 | 48.6  | 128.0 | 50.3  | 128.2 | 129.9 |
|    | 68.6  | 113.8 | 62.5  | 115.0 | 64.2  | 115.1 | 118.0 |
|    | 48.5  | 133.1 | 41.7  | 134.4 | 43.8  | 134.4 | 136.5 |
|    | 161.5 | 24.6  | 160.3 | 24.0  | 160.4 | 24.1  | 27.9  |
|    | 156.7 | 29.2  | 155.9 | 28.0  | 156.1 | 28.2  | 27.3  |
|    | 31.4  | 149.5 | 26.0  | 149.0 | 27.9  | 149.4 | 146.8 |
|    | -7.4  | 186.8 | -13.7 | 185.9 | -11.1 | 186.3 | 188.3 |
|    | 27.3  | 153.4 | 21.6  | 153.1 | 23.7  | 153.4 | 147.1 |
|    | 46.6  | 134.9 | 40.4  | 135.5 | 42.4  | 135.7 | 135.2 |
|    | 30.5  | 150.4 | 24.4  | 150.5 | 27.8  | 149.5 | 153.8 |
|    | 62.7  | 119.5 | 57.8  | 119.3 | 59.5  | 119.6 | 119.7 |
|    | 71.7  | 110.8 | 67.2  | 110.6 | 68.8  | 110.8 | 111.5 |
|    | 74.0  | 108.6 | 68.9  | 109.0 | 70.4  | 109.2 | 108.3 |
|    | -3.5  | 183.0 | -9.9  | 182.4 | -7.7  | 183.0 | 184.4 |

|           |       |       |       |       |       |       |       |
|-----------|-------|-------|-------|-------|-------|-------|-------|
|           | 157.3 | 28.7  | 155.2 | 28.7  | 155.8 | 28.5  | 28.8  |
|           | 54.7  | 127.1 | 47.3  | 129.1 | 49.8  | 128.7 | 128.0 |
|           | 62.7  | 119.5 | 57.3  | 119.8 | 59.5  | 119.5 | 119.6 |
|           | 60.6  | 121.5 | 55.2  | 121.8 | 57.5  | 121.5 | 121.8 |
|           | 46.8  | 134.8 | 40.0  | 135.9 | 42.4  | 135.7 | 137.3 |
|           | 58.2  | 123.9 | 54.4  | 122.5 | 56.2  | 122.7 | 127.6 |
|           | 65.8  | 116.5 | 62.2  | 115.3 | 64.3  | 115.0 | 111.6 |
|           | 60.3  | 121.8 | 55.3  | 121.7 | 57.6  | 121.3 | 122.5 |
|           | 61.1  | 121.1 | 55.9  | 121.1 | 57.8  | 121.2 | 120.8 |
|           | 70.5  | 112.0 | 66.8  | 111.0 | 68.0  | 111.5 | 112.6 |
|           | 42.7  | 138.7 | 36.1  | 139.6 | 38.8  | 139.0 | 133.4 |
|           | 62.0  | 120.1 | 57.1  | 120.0 | 59.3  | 119.7 | 120.5 |
|           | 59.4  | 122.7 | 54.6  | 122.3 | 56.7  | 122.2 | 122.6 |
|           | 160.2 | 25.9  | 159.5 | 24.7  | 159.6 | 24.9  | 25.8  |
|           | 170.1 | 16.4  | 168.4 | 16.4  | 168.9 | 16.1  | 17.8  |
| <b>23</b> | 139.9 | 45.4  | 137.2 | 45.4  | 137.7 | 45.6  | 46.9  |
|           | 124.7 | 60.0  | 122.1 | 59.5  | 122.7 | 59.8  | 55.1  |
|           | 153.5 | 32.3  | 151.2 | 32.4  | 152.1 | 32.0  | 30.2  |
|           | 111.6 | 72.6  | 109.9 | 70.8  | 110.2 | 71.6  | 71.1  |
|           | 10.1  | 170.0 | 5.8   | 167.8 | 8.7   | 167.5 | 171.6 |
|           | 133.8 | 51.3  | 130.9 | 51.3  | 131.9 | 51.1  | 52.9  |
|           | 146.3 | 39.2  | 144.9 | 38.3  | 145.4 | 38.4  | 41.4  |
|           | 33.5  | 147.5 | 29.0  | 146.1 | 31.7  | 145.8 | 154.6 |
|           | 133.1 | 51.9  | 130.4 | 51.8  | 131.6 | 51.4  | 49.3  |
|           | 139.2 | 46.1  | 138.0 | 44.7  | 138.5 | 44.9  | 37.3  |
|           | 152.1 | 33.7  | 149.7 | 33.8  | 150.4 | 33.6  | 23.7  |
|           | 5.8   | 174.1 | 1.2   | 172.1 | 3.9   | 172.1 | 172.0 |
|           | 15.2  | 165.1 | 10.5  | 163.4 | 13.1  | 163.4 | 168.1 |
|           | 9.6   | 170.5 | 4.4   | 169.1 | 7.5   | 168.7 | 172.4 |
|           | 133.0 | 52.0  | 130.3 | 51.8  | 130.9 | 52.1  | 55.4  |
|           | 154.8 | 31.1  | 152.8 | 30.9  | 153.7 | 30.5  | 29.8  |
|           | 74.8  | 107.8 | 69.5  | 108.5 | 71.9  | 107.8 | 105.9 |
|           | 128.4 | 56.4  | 125.7 | 56.1  | 126.3 | 56.3  | 57.0  |
|           | 4.0   | 175.8 | -0.2  | 173.4 | 2.6   | 173.3 | 173.6 |
|           | 140.3 | 45.0  | 139.0 | 43.7  | 139.8 | 43.6  | 40.0  |
|           | 123.9 | 60.7  | 122.4 | 59.2  | 123.4 | 59.1  | 63.3  |
|           | 6.9   | 173.0 | 2.7   | 170.7 | 5.8   | 170.3 | 173.1 |
|           | 119.2 | 65.2  | 117.8 | 63.5  | 118.6 | 63.6  | 60.0  |
|           | 52.7  | 129.1 | 48.4  | 128.1 | 50.6  | 128.0 | 135.9 |
|           | 30.9  | 150.0 | 26.3  | 148.7 | 29.4  | 147.9 | 157.5 |

<sup>[a]</sup> Parameters of linear regression models are presented in Table 2 in main text.

<sup>[b]</sup> For the references to the experimental works, please, see the main text.

**Table S4.** Calculated  $^{13}\text{C}$  NMR shielding constants, together with scaled and experimental chemical shifts – the GIAO-DFT(PBE0) calculations with the second-level basis sets.

| Mol.     | pcS-2    |                                | pecS-2   |                                | pecS-2 mod |                                | $\delta_{\text{exp}}^{[b]}$ |
|----------|----------|--------------------------------|----------|--------------------------------|------------|--------------------------------|-----------------------------|
|          | $\sigma$ | $\delta_{\text{scaled}}^{[a]}$ | $\sigma$ | $\delta_{\text{scaled}}^{[a]}$ | $\sigma$   | $\delta_{\text{scaled}}^{[a]}$ |                             |
| <b>1</b> | 121.3    | 59.3                           | 120.9    | 59.0                           | 121.2      | 59.0                           | 55.5                        |
|          | 145.5    | 36.5                           | 145.0    | 36.5                           | 145.3      | 36.4                           | 33.3                        |
|          | 136.9    | 44.6                           | 136.2    | 44.6                           | 136.5      | 44.7                           | 35.9                        |
|          | 40.2     | 135.4                          | 39.4     | 135.3                          | 40.0       | 135.4                          | 133.2                       |
|          | 126.3    | 54.6                           | 125.9    | 54.3                           | 126.2      | 54.3                           | 54.6                        |
|          | 128.6    | 52.3                           | 128.6    | 51.8                           | 128.6      | 52.1                           | 52.0                        |
|          | 33.3     | 141.9                          | 32.4     | 141.9                          | 33.0       | 142.0                          | 135.2                       |
|          | 70.0     | 107.4                          | 68.9     | 107.7                          | 69.5       | 107.6                          | 107.3                       |
|          | 160.7    | 22.2                           | 160.2    | 22.2                           | 160.6      | 22.0                           | 19.5                        |
|          | 145.5    | 36.5                           | 144.9    | 36.5                           | 145.2      | 36.5                           | 38.5                        |
|          | 49.4     | 126.7                          | 48.3     | 127.0                          | 48.9       | 126.9                          | 128.1                       |
|          | 41.5     | 134.2                          | 40.6     | 134.2                          | 41.1       | 134.4                          | 138.1                       |
|          | 58.0     | 118.7                          | 57.2     | 118.7                          | 57.7       | 118.7                          | 124.5                       |
|          | 29.6     | 145.3                          | 28.8     | 145.3                          | 29.4       | 145.3                          | 145.0                       |
|          | 59.6     | 117.1                          | 58.7     | 117.3                          | 59.3       | 117.2                          | 118.6                       |
|          | 41.0     | 134.6                          | 40.1     | 134.7                          | 40.7       | 134.7                          | 137.1                       |
|          | 67.5     | 109.7                          | 66.5     | 110.0                          | 67.1       | 109.8                          | 112.2                       |
|          | 171.1    | 12.6                           | 170.2    | 12.8                           | 170.6      | 12.6                           | 13.0                        |
|          | 49.6     | 126.5                          | 48.4     | 126.9                          | 49.0       | 126.9                          | 130.1                       |
|          | 58.9     | 117.8                          | 57.9     | 118.0                          | 58.5       | 118.0                          | 119.8                       |
|          | 56.9     | 119.7                          | 56.0     | 119.8                          | 56.5       | 119.8                          | 122.5                       |
|          | 54.6     | 121.8                          | 53.5     | 122.2                          | 54.1       | 122.1                          | 122.8                       |
|          | 42.5     | 133.2                          | 41.6     | 133.2                          | 42.1       | 133.4                          | 136.9                       |
|          | 64.9     | 112.1                          | 64.0     | 112.3                          | 64.6       | 112.2                          | 114.4                       |
|          | 37.4     | 137.9                          | 36.8     | 137.7                          | 37.4       | 137.8                          | 137.2                       |
|          | 73.8     | 103.8                          | 72.7     | 104.1                          | 73.4       | 104.0                          | 106.7                       |
|          | 64.8     | 112.2                          | 63.9     | 112.4                          | 64.5       | 112.4                          | 113.6                       |
|          | 24.3     | 150.2                          | 23.6     | 150.2                          | 24.0       | 150.4                          | 152.0                       |
|          | 60.4     | 116.4                          | 59.3     | 116.7                          | 59.8       | 116.7                          | 119.3                       |
| <b>2</b> | 49.6     | 126.5                          | 48.4     | 126.9                          | 49.2       | 126.7                          | 125.7                       |
|          | 62.5     | 114.4                          | 61.5     | 114.6                          | 62.1       | 114.6                          | 115.1                       |
|          | 53.4     | 122.9                          | 52.8     | 122.7                          | 53.4       | 122.8                          | 124.1                       |
|          | 39.7     | 135.8                          | 38.8     | 135.9                          | 39.3       | 136.0                          | 137.0                       |
|          | 66.1     | 111.1                          | 65.0     | 111.4                          | 65.7       | 111.2                          | 111.4                       |
|          | 54.7     | 121.8                          | 53.8     | 121.9                          | 54.3       | 121.9                          | 122.3                       |
|          | 57.7     | 118.9                          | 56.7     | 119.1                          | 57.3       | 119.1                          | 119.9                       |
|          | 56.5     | 120.1                          | 55.6     | 120.2                          | 56.2       | 120.1                          | 120.4                       |
|          | 111.3    | 68.6                           | 110.5    | 68.7                           | 111.1      | 68.5                           | 68.2                        |
|          | 61.0     | 115.8                          | 60.0     | 116.0                          | 60.6       | 116.0                          | 115.1                       |
|          | 50.7     | 125.5                          | 49.6     | 125.7                          | 50.3       | 125.7                          | 125.7                       |
|          | 40.2     | 135.3                          | 39.3     | 135.5                          | 39.8       | 135.5                          | 137.0                       |
|          | 50.1     | 126.0                          | 49.6     | 125.8                          | 50.1       | 125.9                          | 124.1                       |

|   |       |       |       |       |       |       |       |
|---|-------|-------|-------|-------|-------|-------|-------|
|   | 56.7  | 119.9 | 55.8  | 120.0 | 56.5  | 119.9 | 120.4 |
|   | 58.0  | 118.6 | 57.0  | 118.8 | 57.6  | 118.8 | 119.9 |
|   | 55.3  | 121.2 | 54.4  | 121.3 | 54.9  | 121.3 | 122.3 |
|   | 67.2  | 110.0 | 66.2  | 110.3 | 66.8  | 110.2 | 111.4 |
|   | -28.7 | 200.0 | -29.4 | 199.7 | -28.4 | 199.7 | 201.5 |
|   | 56.2  | 120.3 | 55.1  | 120.7 | 55.7  | 120.6 | 120.8 |
|   | 13.1  | 160.8 | 12.3  | 160.7 | 12.9  | 160.9 | 160.3 |
|   | 50.5  | 125.7 | 49.5  | 125.8 | 50.1  | 125.9 | 125.5 |
|   | 58.8  | 117.9 | 57.8  | 118.1 | 58.3  | 118.2 | 119.4 |
|   | 37.4  | 138.0 | 36.5  | 138.1 | 36.9  | 138.2 | 137.6 |
|   | 64.8  | 112.2 | 63.8  | 112.5 | 64.5  | 112.4 | 112.9 |
| 3 | 140.6 | 41.2  | 139.8 | 41.3  | 140.1 | 41.3  | 40.3  |
|   | 122.6 | 58.1  | 122.2 | 57.8  | 122.5 | 57.8  | 64.8  |
|   | 142.9 | 39.0  | 142.0 | 39.2  | 142.4 | 39.1  | 39.2  |
|   | 108.1 | 71.6  | 107.4 | 71.6  | 107.6 | 71.8  | 72.2  |
|   | 117.3 | 63.0  | 117.0 | 62.7  | 117.2 | 62.8  | 65.5  |
|   | 139.8 | 41.9  | 139.3 | 41.8  | 139.5 | 41.8  | 41.7  |
|   | 149.7 | 32.6  | 149.2 | 32.5  | 149.4 | 32.5  | 32.7  |
|   | 28.1  | 146.7 | 27.3  | 146.6 | 27.8  | 146.8 | 138.6 |
|   | -1.4  | 174.4 | -2.0  | 174.1 | -0.9  | 173.8 | 172.7 |
|   | 42.3  | 133.3 | 41.7  | 133.2 | 42.2  | 133.3 | 137.9 |
|   | 132.4 | 48.8  | 132.2 | 48.4  | 132.5 | 48.4  | 49.5  |
|   | 140.6 | 41.2  | 140.1 | 41.0  | 140.3 | 41.1  | 41.6  |
|   | 140.6 | 41.2  | 140.3 | 40.9  | 140.5 | 40.9  | 41.9  |
|   | 122.0 | 58.6  | 121.8 | 58.1  | 122.0 | 58.3  | 52.9  |
|   | 32.2  | 142.9 | 31.3  | 142.9 | 32.0  | 142.9 | 143.3 |
|   | 160.3 | 22.6  | 159.6 | 22.7  | 159.9 | 22.6  | 21.1  |
|   | 154.8 | 27.8  | 154.3 | 27.7  | 154.5 | 27.7  | 25.9  |
|   | 158.3 | 24.5  | 157.9 | 24.4  | 158.1 | 24.3  | 24.5  |
|   | 43.1  | 132.6 | 42.3  | 132.6 | 42.8  | 132.7 | 132.6 |
|   | 153.9 | 28.6  | 153.5 | 28.4  | 153.6 | 28.5  | 26.5  |
|   | 44.6  | 131.3 | 43.7  | 131.3 | 44.4  | 131.2 | 128.5 |
|   | 150.5 | 31.9  | 149.8 | 32.0  | 150.0 | 31.9  | 25.9  |
|   | 47.6  | 128.4 | 46.4  | 128.8 | 47.0  | 128.8 | 128.5 |
|   | 151.6 | 30.8  | 151.0 | 30.8  | 151.3 | 30.7  | 25.8  |
|   | 42.2  | 133.5 | 41.4  | 133.5 | 42.0  | 133.5 | 131.8 |
|   | 37.2  | 138.2 | 36.6  | 137.9 | 37.2  | 138.0 | 137.8 |
|   | 55.2  | 121.3 | 54.0  | 121.6 | 54.7  | 121.6 | 121.0 |
|   | 63.7  | 113.3 | 62.7  | 113.5 | 63.3  | 113.4 | 113.7 |
|   | 36.1  | 139.1 | 35.3  | 139.2 | 35.8  | 139.3 | 140.6 |
|   | 15.3  | 158.7 | 14.4  | 158.7 | 14.9  | 158.9 | 148.1 |
|   | 54.3  | 122.1 | 53.4  | 122.2 | 54.0  | 122.2 | 121.6 |
|   | 66.3  | 110.9 | 65.3  | 111.1 | 65.9  | 111.0 | 111.9 |
|   | 57.6  | 119.0 | 56.5  | 119.3 | 57.1  | 119.3 | 121.0 |
|   | 57.6  | 119.0 | 56.6  | 119.2 | 57.1  | 119.2 | 119.5 |
|   | 47.3  | 128.7 | 46.4  | 128.8 | 46.9  | 128.9 | 128.2 |
|   | 8.2   | 165.4 | 7.3   | 165.4 | 8.2   | 165.2 | 167.0 |
| 4 | 11.7  | 162.1 | 11.2  | 161.8 | 11.8  | 161.8 | 161.4 |
|   | 126.3 | 54.5  | 125.9 | 54.3  | 126.2 | 54.3  | 55.0  |
|   | 4.6   | 168.7 | 4.1   | 168.4 | 4.8   | 168.4 | 168.2 |

|  |       |       |       |       |       |       |       |
|--|-------|-------|-------|-------|-------|-------|-------|
|  | 132.3 | 48.9  | 131.8 | 48.8  | 132.1 | 48.8  | 48.7  |
|  | 125.9 | 54.9  | 125.3 | 54.9  | 125.4 | 55.1  | 52.4  |
|  | 38.9  | 136.6 | 37.9  | 136.7 | 38.5  | 136.7 | 134.9 |
|  | 52.5  | 123.8 | 51.7  | 123.8 | 52.3  | 123.8 | 122.6 |
|  | 53.4  | 122.9 | 52.4  | 123.1 | 53.0  | 123.1 | 122.8 |
|  | 44.3  | 131.5 | 43.4  | 131.6 | 43.9  | 131.7 | 130.0 |
|  | 66.0  | 111.1 | 64.9  | 111.4 | 65.6  | 111.3 | 111.1 |
|  | 30.3  | 144.6 | 29.7  | 144.5 | 30.2  | 144.6 | 144.8 |
|  | 138.7 | 42.9  | 138.0 | 43.0  | 138.2 | 43.1  | 41.8  |
|  | 92.4  | 86.3  | 92.0  | 86.1  | 92.4  | 86.1  | 87.3  |
|  | 84.8  | 93.5  | 83.6  | 93.9  | 84.4  | 93.7  | 92.6  |
|  | 151.4 | 31.0  | 150.6 | 31.1  | 150.8 | 31.2  | 31.1  |
|  | 110.3 | 69.6  | 110.0 | 69.2  | 110.4 | 69.2  | 69.2  |
|  | 145.4 | 36.6  | 145.0 | 36.5  | 145.0 | 36.6  | 35.8  |
|  | 130.2 | 50.9  | 129.4 | 51.0  | 129.8 | 50.9  | 50.8  |
|  | 102.3 | 77.1  | 102.0 | 76.7  | 102.3 | 76.8  | 76.2  |
|  | 5.3   | 168.1 | 4.7   | 167.9 | 5.7   | 167.6 | 169.1 |
|  | 129.6 | 51.5  | 129.1 | 51.3  | 129.2 | 51.5  | 51.7  |
|  | 83.2  | 95.0  | 82.8  | 94.7  | 83.3  | 94.7  | 93.6  |
|  | 130.9 | 50.2  | 130.8 | 49.7  | 130.9 | 49.9  | 48.6  |
|  | 127.5 | 53.4  | 127.4 | 52.9  | 127.5 | 53.1  | 51.6  |
|  | 150.3 | 32.0  | 149.8 | 32.0  | 150.1 | 31.8  | 30.6  |
|  | 122.3 | 58.3  | 121.5 | 58.4  | 122.0 | 58.3  | 57.0  |
|  | 35.7  | 139.6 | 34.8  | 139.7 | 35.4  | 139.7 | 136.6 |
|  | 58.2  | 118.4 | 57.3  | 118.6 | 58.0  | 118.4 | 116.3 |
|  | 53.5  | 122.9 | 52.7  | 122.9 | 53.1  | 123.0 | 121.6 |
|  | 61.4  | 115.4 | 60.5  | 115.6 | 61.0  | 115.6 | 116.5 |
|  | 34.7  | 140.5 | 33.9  | 140.5 | 34.5  | 140.5 | 142.0 |
|  | 39.4  | 136.1 | 38.7  | 136.0 | 39.3  | 136.0 | 136.1 |
|  | 155.3 | 27.4  | 154.8 | 27.3  | 155.0 | 27.2  | 25.5  |
|  | 97.3  | 81.8  | 96.9  | 81.5  | 97.2  | 81.6  | 80.5  |
|  | 150.0 | 32.3  | 149.2 | 32.4  | 149.4 | 32.5  | 31.2  |
|  | 148.2 | 34.0  | 147.6 | 34.0  | 148.0 | 33.8  | 31.6  |
|  | 113.3 | 66.8  | 112.9 | 66.5  | 113.2 | 66.5  | 65.1  |
|  | 143.4 | 38.5  | 142.9 | 38.4  | 143.0 | 38.5  | 36.8  |
|  | 135.9 | 45.5  | 135.2 | 45.6  | 135.4 | 45.7  | 46.3  |
|  | 116.4 | 63.9  | 115.9 | 63.7  | 116.3 | 63.6  | 64.7  |
|  | 149.8 | 32.5  | 149.2 | 32.5  | 149.5 | 32.4  | 29.3  |
|  | 130.5 | 50.6  | 130.1 | 50.4  | 130.3 | 50.5  | 50.7  |
|  | 14.7  | 159.3 | 14.3  | 158.9 | 14.9  | 159.0 | 158.7 |
|  | 127.9 | 53.1  | 127.5 | 52.8  | 127.8 | 52.8  | 53.5  |
|  | 13.5  | 160.4 | 13.1  | 160.0 | 13.6  | 160.2 | 158.7 |
|  | 72.6  | 104.9 | 71.6  | 105.2 | 72.3  | 105.0 | 104.6 |
|  | 118.3 | 62.1  | 117.6 | 62.1  | 117.7 | 62.3  | 60.9  |
|  | 38.8  | 136.6 | 38.0  | 136.6 | 38.6  | 136.7 | 135.4 |
|  | 49.5  | 126.6 | 48.7  | 126.6 | 49.3  | 126.6 | 124.4 |
|  | 52.5  | 123.8 | 51.5  | 124.0 | 52.1  | 123.9 | 123.4 |
|  | 43.9  | 131.9 | 43.0  | 132.0 | 43.5  | 132.1 | 131.2 |
|  | 65.8  | 111.3 | 65.0  | 111.4 | 65.5  | 111.4 | 111.6 |
|  | 31.1  | 143.9 | 30.5  | 143.7 | 31.0  | 143.8 | 144.7 |

|   |       |       |       |       |       |       |       |
|---|-------|-------|-------|-------|-------|-------|-------|
|   | 141.5 | 40.3  | 140.9 | 40.3  | 141.2 | 40.2  | 39.8  |
|   | 92.9  | 85.9  | 92.4  | 85.7  | 92.8  | 85.7  | 87.1  |
|   | 79.0  | 98.9  | 77.9  | 99.3  | 78.7  | 99.0  | 98.4  |
|   | 153.3 | 29.2  | 152.5 | 29.4  | 152.8 | 29.3  | 28.2  |
|   | 115.5 | 64.7  | 115.3 | 64.3  | 115.4 | 64.4  | 64.3  |
|   | 145.1 | 36.9  | 144.6 | 36.8  | 144.9 | 36.7  | 37.0  |
|   | 131.4 | 49.8  | 130.6 | 49.9  | 130.8 | 50.0  | 49.1  |
|   | 107.1 | 72.6  | 106.7 | 72.3  | 106.9 | 72.4  | 72.1  |
|   | 6.3   | 167.2 | 5.5   | 167.1 | 6.7   | 166.7 | 168.6 |
|   | 129.6 | 51.5  | 129.1 | 51.3  | 129.2 | 51.5  | 51.9  |
|   | 83.1  | 95.1  | 82.8  | 94.7  | 83.2  | 94.7  | 93.2  |
|   | 130.8 | 50.3  | 130.6 | 49.9  | 130.8 | 50.0  | 48.6  |
|   | 127.7 | 53.3  | 127.5 | 52.8  | 127.7 | 52.9  | 51.6  |
|   | 148.8 | 33.4  | 148.3 | 33.3  | 148.7 | 33.1  | 31.4  |
|   | 122.0 | 58.6  | 121.2 | 58.7  | 121.6 | 58.6  | 56.0  |
|   | 36.5  | 138.8 | 35.6  | 138.9 | 36.3  | 138.9 | 135.9 |
|   | 55.8  | 120.7 | 54.9  | 120.8 | 55.6  | 120.7 | 115.9 |
|   | 53.3  | 123.0 | 52.5  | 123.0 | 53.0  | 123.1 | 120.9 |
|   | 51.8  | 124.4 | 51.0  | 124.5 | 51.7  | 124.4 | 118.9 |
|   | 36.4  | 138.9 | 35.6  | 138.9 | 36.3  | 138.9 | 142.0 |
|   | 33.4  | 141.7 | 32.7  | 141.6 | 33.4  | 141.6 | 136.9 |
|   | 155.2 | 27.4  | 154.7 | 27.3  | 155.0 | 27.2  | 25.5  |
|   | 97.6  | 81.5  | 97.2  | 81.2  | 97.4  | 81.4  | 80.5  |
|   | 149.0 | 33.3  | 148.2 | 33.5  | 148.6 | 33.3  | 32.3  |
|   | 148.5 | 33.7  | 147.8 | 33.8  | 148.4 | 33.5  | 32.1  |
|   | 113.9 | 66.2  | 113.5 | 65.9  | 113.8 | 66.0  | 64.8  |
|   | 144.2 | 37.7  | 143.7 | 37.6  | 143.9 | 37.7  | 36.2  |
|   | 135.9 | 45.6  | 135.2 | 45.6  | 135.4 | 45.6  | 46.1  |
|   | 116.8 | 63.5  | 116.3 | 63.3  | 116.7 | 63.2  | 64.7  |
|   | 145.7 | 36.4  | 145.0 | 36.4  | 145.4 | 36.2  | 36.0  |
|   | 137.2 | 44.3  | 136.9 | 44.0  | 137.1 | 44.1  | 45.2  |
| 5 | 118.6 | 61.8  | 118.0 | 61.7  | 118.2 | 61.8  | 62.3  |
|   | 117.5 | 62.8  | 116.9 | 62.8  | 117.1 | 62.9  | 63.8  |
|   | 139.8 | 41.9  | 139.3 | 41.8  | 139.4 | 41.9  | 42.5  |
|   | 91.4  | 87.3  | 91.0  | 87.0  | 91.0  | 87.4  | 88.0  |
|   | 127.2 | 53.7  | 126.7 | 53.6  | 126.9 | 53.7  | 53.7  |
|   | 137.9 | 43.6  | 137.5 | 43.5  | 137.4 | 43.8  | 44.6  |
|   | 101.9 | 77.5  | 101.5 | 77.2  | 101.5 | 77.6  | 77.7  |
|   | 148.1 | 34.1  | 147.5 | 34.0  | 147.8 | 34.0  | 35.9  |
|   | 97.2  | 81.9  | 96.6  | 81.8  | 96.9  | 81.9  | 83.5  |
|   | 124.3 | 56.5  | 123.7 | 56.4  | 123.8 | 56.6  | 57.5  |
|   | 25.6  | 149.1 | 25.0  | 148.9 | 25.6  | 148.9 | 145.9 |
|   | 132.3 | 48.9  | 131.7 | 48.8  | 132.0 | 48.9  | 49.5  |
|   | 142.9 | 39.0  | 142.3 | 39.0  | 142.7 | 38.8  | 35.9  |
|   | 39.6  | 135.9 | 38.9  | 135.8 | 39.4  | 135.9 | 133.7 |
|   | 167.3 | 16.1  | 166.7 | 16.1  | 167.1 | 15.9  | 17.4  |
|   | 156.9 | 25.9  | 156.3 | 25.9  | 156.6 | 25.8  | 25.0  |
|   | 105.3 | 74.2  | 104.8 | 74.1  | 105.0 | 74.3  | 73.8  |
|   | 157.5 | 25.3  | 156.9 | 25.3  | 157.2 | 25.2  | 27.6  |
|   | 138.5 | 43.1  | 137.8 | 43.2  | 138.0 | 43.2  | 43.2  |

|   |       |       |       |       |       |       |       |
|---|-------|-------|-------|-------|-------|-------|-------|
|   | 97.8  | 81.3  | 97.3  | 81.1  | 97.6  | 81.2  | 82.2  |
|   | 165.9 | 17.4  | 165.1 | 17.6  | 165.5 | 17.4  | 17.1  |
|   | 136.6 | 44.9  | 136.0 | 44.8  | 136.4 | 44.7  | 42.1  |
|   | -7.5  | 180.1 | -8.2  | 179.9 | -7.0  | 179.5 | 178.9 |
|   | 131.9 | 49.3  | 131.2 | 49.3  | 131.5 | 49.3  | 50.1  |
|   | 158.8 | 24.1  | 158.2 | 24.1  | 158.5 | 24.0  | 24.0  |
|   | 153.6 | 28.9  | 153.0 | 28.9  | 153.4 | 28.7  | 30.0  |
|   | 172.8 | 11.0  | 172.1 | 11.0  | 172.3 | 11.0  | 12.7  |
|   | 138.9 | 42.7  | 138.2 | 42.8  | 138.5 | 42.8  | 43.5  |
|   | -7.7  | 180.3 | -8.4  | 180.1 | -7.2  | 179.8 | 178.9 |
|   | 172.9 | 10.8  | 172.3 | 10.8  | 172.5 | 10.8  | 12.9  |
| 6 | 40.0  | 135.5 | 39.1  | 135.6 | 39.6  | 135.7 | 135.3 |
|   | 49.4  | 126.7 | 48.4  | 126.9 | 48.9  | 127.0 | 128.0 |
|   | 48.0  | 128.0 | 47.1  | 128.2 | 47.6  | 128.2 | 127.4 |
|   | 55.4  | 121.1 | 54.1  | 121.6 | 54.8  | 121.5 | 121.3 |
|   | 29.7  | 145.2 | 28.9  | 145.1 | 29.4  | 145.3 | 146.3 |
|   | 49.6  | 126.5 | 48.7  | 126.6 | 49.3  | 126.6 | 131.8 |
|   | 11.5  | 162.3 | 10.7  | 162.2 | 11.6  | 162.1 | 162.2 |
|   | 16.9  | 157.2 | 16.4  | 156.8 | 17.2  | 156.8 | 155.3 |
|   | 43.1  | 132.6 | 42.4  | 132.5 | 42.9  | 132.6 | 133.7 |
|   | 48.6  | 127.4 | 47.5  | 127.8 | 48.2  | 127.7 | 130.4 |
|   | 7.8   | 165.7 | 7.2   | 165.5 | 8.2   | 165.3 | 168.4 |
|   | 120.9 | 59.6  | 120.3 | 59.6  | 120.6 | 59.6  | 50.7  |
|   | 47.0  | 128.9 | 46.2  | 129.0 | 46.6  | 129.1 | 128.6 |
|   | 42.4  | 133.2 | 41.6  | 133.3 | 42.1  | 133.3 | 127.8 |
|   | 47.8  | 128.2 | 47.0  | 128.2 | 47.5  | 128.3 | 129.3 |
|   | 44.5  | 131.3 | 43.7  | 131.3 | 44.0  | 131.6 | 129.9 |
|   | 137.2 | 44.3  | 136.5 | 44.4  | 136.8 | 44.3  | 42.9  |
|   | 100.7 | 78.6  | 100.0 | 78.5  | 100.2 | 78.8  | 80.9  |
|   | 38.0  | 137.4 | 37.1  | 137.5 | 37.7  | 137.5 | 139.6 |
|   | 37.9  | 137.5 | 37.2  | 137.4 | 37.7  | 137.6 | 136.3 |
|   | 92.2  | 86.5  | 92.1  | 86.0  | 92.3  | 86.2  | 86.8  |
|   | 52.2  | 124.1 | 51.3  | 124.2 | 51.9  | 124.2 | 124.0 |
|   | 52.7  | 123.6 | 51.7  | 123.8 | 52.3  | 123.8 | 126.0 |
|   | 44.1  | 131.7 | 43.2  | 131.7 | 43.7  | 131.9 | 129.8 |
|   | 59.6  | 117.1 | 58.7  | 117.3 | 59.2  | 117.3 | 115.9 |
|   | 113.2 | 66.8  | 112.9 | 66.5  | 113.1 | 66.7  | 62.0  |
|   | 3.0   | 170.3 | 2.4   | 170.0 | 3.5   | 169.7 | 171.4 |
|   | 150.3 | 32.0  | 149.7 | 32.0  | 150.0 | 31.9  | 34.5  |
|   | 157.2 | 25.5  | 156.8 | 25.4  | 156.8 | 25.5  | 25.2  |
|   | 160.2 | 22.7  | 159.6 | 22.8  | 159.9 | 22.6  | 23.6  |
|   | 160.8 | 22.2  | 160.2 | 22.2  | 160.4 | 22.2  | 21.4  |
| 7 | 105.3 | 74.2  | 105.0 | 73.9  | 105.2 | 74.1  | 73.8  |
|   | 94.9  | 84.1  | 94.7  | 83.5  | 94.9  | 83.8  | 80.2  |
|   | 103.5 | 76.0  | 102.8 | 75.9  | 103.0 | 76.2  | 73.6  |
|   | 137.6 | 43.9  | 137.0 | 43.9  | 137.3 | 43.9  | 42.7  |
|   | 45.4  | 130.4 | 44.6  | 130.5 | 45.0  | 130.6 | 126.7 |
|   | 101.3 | 78.0  | 100.6 | 78.0  | 100.7 | 78.3  | 76.3  |
|   | 13.4  | 160.5 | 12.8  | 160.3 | 13.8  | 160.0 | 163.1 |
|   | 9.5   | 164.1 | 8.9   | 163.9 | 9.9   | 163.7 | 165.6 |

|   |       |       |       |       |       |       |       |
|---|-------|-------|-------|-------|-------|-------|-------|
|   | 26.2  | 148.5 | 25.6  | 148.3 | 26.1  | 148.4 | 148.4 |
|   | 40.6  | 134.9 | 39.9  | 134.9 | 40.4  | 134.9 | 134.1 |
|   | 48.9  | 127.2 | 48.2  | 127.1 | 48.8  | 127.1 | 127.3 |
|   | 52.4  | 123.9 | 51.6  | 123.9 | 52.2  | 123.9 | 125.0 |
|   | 119.0 | 61.4  | 118.4 | 61.4  | 118.6 | 61.5  | 60.4  |
|   | 67.2  | 110.0 | 66.1  | 110.3 | 66.8  | 110.2 | 107.8 |
|   | 46.0  | 129.9 | 45.0  | 130.1 | 45.6  | 130.1 | 130.4 |
|   | 66.4  | 110.8 | 65.3  | 111.1 | 66.0  | 110.9 | 111.1 |
|   | 158.5 | 24.3  | 158.0 | 24.2  | 158.1 | 24.3  | 27.5  |
|   | 154.5 | 28.0  | 153.7 | 28.3  | 154.0 | 28.1  | 27.1  |
|   | 57.1  | 119.5 | 56.1  | 119.7 | 56.7  | 119.6 | 120.3 |
|   | 66.5  | 110.6 | 65.6  | 110.8 | 66.2  | 110.7 | 111.5 |
|   | 100.8 | 78.4  | 100.1 | 78.5  | 100.3 | 78.7  | 74.9  |
|   | 44.9  | 131.0 | 44.0  | 131.0 | 44.5  | 131.2 | 131.4 |
|   | 52.1  | 124.1 | 51.3  | 124.2 | 51.9  | 124.2 | 119.2 |
|   | 102.6 | 76.8  | 101.9 | 76.8  | 102.0 | 77.1  | 76.6  |
|   | 54.7  | 121.8 | 53.7  | 122.0 | 54.3  | 121.9 | 122.8 |
|   | 10.0  | 163.7 | 9.3   | 163.5 | 10.3  | 163.3 | 165.6 |
|   | 58.2  | 118.5 | 57.2  | 118.7 | 57.8  | 118.7 | 120.6 |
|   | 7.4   | 166.1 | 6.7   | 166.0 | 7.6   | 165.8 | 166.8 |
|   | 157.8 | 25.0  | 157.4 | 24.8  | 157.5 | 24.9  | 28.3  |
|   | 117.1 | 63.2  | 116.5 | 63.1  | 116.7 | 63.2  | 61.1  |
|   | 159.8 | 23.2  | 159.3 | 23.0  | 159.4 | 23.1  | 27.5  |
| 8 | 141.1 | 40.6  | 140.5 | 40.7  | 140.7 | 40.7  | 40.5  |
|   | 124.4 | 56.3  | 123.8 | 56.3  | 124.1 | 56.3  | 56.7  |
|   | 117.2 | 63.1  | 116.8 | 62.8  | 117.1 | 62.8  | 62.9  |
|   | 150.4 | 31.9  | 149.7 | 32.0  | 150.0 | 31.9  | 31.7  |
|   | 98.3  | 80.9  | 98.0  | 80.5  | 98.1  | 80.7  | 81.1  |
|   | 131.0 | 50.1  | 130.4 | 50.1  | 130.8 | 50.0  | 50.3  |
|   | 150.3 | 32.1  | 149.8 | 32.0  | 150.0 | 31.9  | 32.2  |
|   | 142.0 | 39.9  | 141.6 | 39.6  | 141.9 | 39.6  | 39.9  |
|   | 139.9 | 41.8  | 139.3 | 41.8  | 139.5 | 41.8  | 42.0  |
|   | 161.8 | 21.2  | 161.1 | 21.3  | 161.4 | 21.2  | 21.1  |
|   | 144.3 | 37.7  | 143.5 | 37.8  | 143.8 | 37.8  | 37.2  |
|   | 68.8  | 108.5 | 68.6  | 108.0 | 68.6  | 108.5 | 109.3 |
|   | 167.7 | 15.7  | 167.1 | 15.7  | 167.2 | 15.7  | 16.3  |
|   | 149.7 | 32.6  | 149.1 | 32.6  | 149.4 | 32.5  | 32.3  |
|   | 29.7  | 145.2 | 28.8  | 145.3 | 29.3  | 145.4 | 140.8 |
|   | 144.3 | 37.6  | 143.8 | 37.6  | 144.0 | 37.6  | 37.5  |
|   | 170.0 | 13.5  | 169.4 | 13.5  | 169.7 | 13.5  | 15.0  |
|   | 151.1 | 31.3  | 150.5 | 31.2  | 151.0 | 31.0  | 31.7  |
|   | 52.6  | 123.8 | 51.9  | 123.6 | 52.4  | 123.7 | 121.8 |
|   | 164.2 | 19.0  | 163.6 | 19.0  | 163.8 | 18.9  | 19.4  |
|   | 140.3 | 41.4  | 139.6 | 41.5  | 140.1 | 41.3  | 39.0  |
|   | 152.2 | 30.2  | 151.6 | 30.2  | 152.0 | 30.1  | 30.4  |
|   | 107.5 | 72.2  | 107.2 | 71.9  | 107.4 | 72.0  | 78.2  |
|   | 153.6 | 29.0  | 153.1 | 28.8  | 153.4 | 28.7  | 29.3  |
|   | 151.4 | 31.0  | 151.1 | 30.7  | 151.1 | 30.9  | 30.6  |
|   | 114.0 | 66.1  | 113.8 | 65.7  | 113.9 | 65.9  | 66.9  |
|   | 167.3 | 16.1  | 166.8 | 16.0  | 167.0 | 15.9  | 17.3  |



|           |       |       |       |       |       |       |       |
|-----------|-------|-------|-------|-------|-------|-------|-------|
|           | 76.8  | 101.0 | 76.6  | 100.5 | 76.9  | 100.7 | 102.5 |
|           | 109.6 | 70.2  | 109.0 | 70.1  | 109.2 | 70.3  | 71.8  |
|           | 102.5 | 76.9  | 101.9 | 76.8  | 102.3 | 76.8  | 78.2  |
|           | 103.2 | 76.2  | 103.0 | 75.8  | 103.2 | 75.9  | 78.2  |
|           | 107.4 | 72.2  | 107.1 | 71.9  | 107.3 | 72.1  | 75.5  |
|           | 117.2 | 63.1  | 116.8 | 62.9  | 116.9 | 63.1  | 62.7  |
| <b>9</b>  | 141.8 | 40.0  | 140.9 | 40.2  | 141.5 | 40.0  | 40.1  |
|           | 119.6 | 60.9  | 118.8 | 61.0  | 119.3 | 60.8  | 60.9  |
|           | 138.1 | 43.4  | 137.2 | 43.7  | 137.6 | 43.6  | 44.0  |
|           | 129.7 | 51.4  | 128.9 | 51.5  | 129.3 | 51.4  | 51.6  |
|           | 165.4 | 17.8  | 164.7 | 18.0  | 165.1 | 17.7  | 17.3  |
|           | 144.8 | 37.2  | 144.2 | 37.2  | 144.4 | 37.2  | 37.4  |
|           | 104.4 | 75.1  | 103.7 | 75.1  | 104.2 | 75.0  | 76.1  |
|           | 142.7 | 39.1  | 141.9 | 39.3  | 142.3 | 39.1  | 37.9  |
|           | 126.6 | 54.3  | 125.8 | 54.4  | 126.3 | 54.2  | 53.5  |
|           | 141.0 | 40.8  | 140.0 | 41.1  | 140.5 | 40.9  | 38.5  |
|           | 133.8 | 47.5  | 133.0 | 47.6  | 133.3 | 47.7  | 42.6  |
|           | 153.0 | 29.5  | 152.2 | 29.7  | 152.5 | 29.6  | 30.0  |
|           | 144.7 | 37.2  | 144.2 | 37.2  | 144.4 | 37.2  | 37.3  |
|           | 154.4 | 28.2  | 153.7 | 28.3  | 154.1 | 28.1  | 32.1  |
|           | 151.9 | 30.5  | 151.3 | 30.5  | 151.5 | 30.5  | 35.5  |
|           | 156.1 | 26.6  | 155.3 | 26.8  | 155.4 | 26.9  | 27.8  |
|           | 149.5 | 32.8  | 149.0 | 32.7  | 149.2 | 32.6  | 32.2  |
|           | 151.9 | 30.6  | 151.5 | 30.4  | 151.5 | 30.5  | 35.0  |
|           | 149.5 | 32.8  | 148.7 | 32.9  | 149.3 | 32.6  | 31.1  |
|           | 112.3 | 67.7  | 111.6 | 67.7  | 111.8 | 67.9  | 68.7  |
|           | -4.9  | 177.7 | -5.6  | 177.5 | -4.3  | 177.0 | 176.8 |
|           | 97.2  | 81.8  | 96.8  | 81.6  | 96.8  | 81.9  | 83.8  |
|           | 168.5 | 15.0  | 167.8 | 15.0  | 168.1 | 14.9  | 15.5  |
|           | 171.5 | 12.2  | 170.7 | 12.3  | 170.9 | 12.3  | 12.8  |
|           | 168.5 | 14.9  | 168.0 | 14.9  | 168.2 | 14.8  | 13.1  |
|           | 166.8 | 16.6  | 166.1 | 16.7  | 166.4 | 16.6  | 21.5  |
|           | 146.8 | 35.3  | 146.1 | 35.4  | 146.4 | 35.4  | 30.6  |
|           | 150.8 | 31.6  | 150.2 | 31.6  | 150.5 | 31.4  | 30.0  |
|           | 148.2 | 34.0  | 147.6 | 34.0  | 147.9 | 33.9  | 34.1  |
|           | -6.5  | 179.1 | -7.2  | 179.0 | -5.9  | 178.6 | 178.0 |
| <b>10</b> | 125.8 | 55.0  | 125.3 | 54.8  | 125.5 | 55.0  | 57.9  |
|           | 158.5 | 24.3  | 157.7 | 24.5  | 158.1 | 24.3  | 25.2  |
|           | 147.9 | 34.3  | 147.3 | 34.3  | 147.4 | 34.4  | 30.5  |
|           | 140.2 | 41.5  | 139.7 | 41.3  | 140.0 | 41.3  | 44.1  |
|           | 132.8 | 48.4  | 132.5 | 48.2  | 132.5 | 48.3  | 50.5  |
|           | 66.5  | 110.6 | 65.5  | 110.9 | 66.1  | 110.8 | 110.6 |
|           | 2.9   | 170.4 | 2.2   | 170.2 | 3.2   | 170.0 | 171.3 |
|           | 106.9 | 72.7  | 106.6 | 72.4  | 106.7 | 72.7  | 71.7  |
|           | 143.1 | 38.8  | 142.4 | 38.9  | 142.5 | 39.0  | 40.8  |
|           | 134.7 | 46.7  | 134.0 | 46.8  | 134.3 | 46.7  | 42.6  |
|           | 133.9 | 47.4  | 133.4 | 47.3  | 133.4 | 47.5  | 47.1  |
|           | -3.8  | 176.6 | -4.3  | 176.3 | -3.3  | 176.1 | 174.9 |
|           | 43.6  | 132.1 | 42.8  | 132.2 | 43.4  | 132.2 | 134.1 |
|           | 36.2  | 139.1 | 35.6  | 138.9 | 36.2  | 139.0 | 130.6 |

|    |       |       |       |       |       |       |       |
|----|-------|-------|-------|-------|-------|-------|-------|
|    | 141.3 | 40.5  | 140.5 | 40.6  | 140.9 | 40.5  | 42.1  |
|    | 49.0  | 127.1 | 47.9  | 127.4 | 48.6  | 127.3 | 128.5 |
|    | -3.0  | 175.9 | -3.7  | 175.7 | -2.7  | 175.5 | 177.9 |
|    | 161.1 | 21.9  | 160.6 | 21.8  | 160.8 | 21.7  | 22.0  |
|    | 152.8 | 29.7  | 152.4 | 29.5  | 152.5 | 29.5  | 31.1  |
|    | 40.8  | 134.8 | 39.6  | 135.1 | 40.2  | 135.2 | 132.7 |
|    | 51.8  | 124.4 | 51.2  | 124.2 | 51.8  | 124.3 | 124.2 |
|    | 40.0  | 135.5 | 39.2  | 135.5 | 39.7  | 135.6 | 138.1 |
|    | 164.4 | 18.8  | 163.8 | 18.8  | 164.1 | 18.7  | 19.6  |
|    | 172.4 | 11.3  | 171.8 | 11.4  | 172.0 | 11.3  | 20.0  |
|    | 1.6   | 171.6 | 0.9   | 171.4 | 2.0   | 171.1 | 172.1 |
|    | 167.9 | 15.5  | 167.2 | 15.7  | 167.5 | 15.5  | 18.5  |
|    | 163.7 | 19.5  | 163.1 | 19.5  | 163.3 | 19.5  | 18.2  |
|    | 57.3  | 119.3 | 56.3  | 119.5 | 56.9  | 119.5 | 119.3 |
|    | 66.2  | 110.9 | 65.2  | 111.1 | 65.9  | 111.0 | 112.3 |
|    | 46.6  | 129.4 | 45.7  | 129.4 | 46.2  | 129.5 | 128.2 |
|    | 48.5  | 127.6 | 47.6  | 127.6 | 48.1  | 127.7 | 128.2 |
|    | 57.8  | 118.8 | 56.9  | 119.0 | 57.4  | 119.0 | 119.8 |
|    | 55.4  | 121.1 | 54.5  | 121.2 | 55.0  | 121.2 | 122.4 |
|    | 64.0  | 113.0 | 63.0  | 113.3 | 63.5  | 113.3 | 116.2 |
|    | 62.6  | 114.4 | 61.5  | 114.7 | 62.0  | 114.6 | 116.2 |
|    | 18.4  | 155.8 | 17.6  | 155.7 | 18.1  | 155.9 | 157.7 |
| 11 | 130.6 | 50.5  | 130.4 | 50.1  | 130.3 | 50.5  | 49.4  |
|    | 10.0  | 163.7 | 9.0   | 163.8 | 9.8   | 163.8 | 169.4 |
|    | 61.8  | 115.0 | 60.6  | 115.5 | 61.2  | 115.4 | 106.6 |
|    | 34.6  | 140.6 | 33.7  | 140.6 | 34.2  | 140.8 | 141.5 |
|    | 149.6 | 32.7  | 148.9 | 32.8  | 149.1 | 32.7  | 36.9  |
|    | 14.6  | 159.4 | 13.9  | 159.2 | 14.6  | 159.3 | 165.3 |
|    | 58.6  | 118.1 | 57.4  | 118.4 | 58.1  | 118.4 | 124.5 |
|    | 17.5  | 156.6 | 16.7  | 156.6 | 17.3  | 156.7 | 158.1 |
|    | 68.5  | 108.8 | 67.4  | 109.1 | 68.0  | 109.0 | 117.3 |
|    | 53.0  | 123.4 | 51.9  | 123.6 | 52.6  | 123.5 | 124.4 |
|    | 38.7  | 136.8 | 37.9  | 136.8 | 38.5  | 136.8 | 134.8 |
|    | 56.0  | 120.5 | 54.9  | 120.9 | 55.5  | 120.8 | 120.6 |
|    | 25.2  | 149.4 | 24.4  | 149.4 | 25.0  | 149.5 | 151.8 |
|    | 66.1  | 111.1 | 64.8  | 111.5 | 65.5  | 111.4 | 115.2 |
|    | 42.1  | 133.6 | 41.0  | 133.8 | 41.7  | 133.8 | 137.2 |
|    | 58.4  | 118.3 | 57.5  | 118.4 | 58.1  | 118.4 | 120.5 |
|    | 36.5  | 138.8 | 35.5  | 139.0 | 36.0  | 139.1 | 136.9 |
|    | 72.5  | 105.0 | 71.5  | 105.3 | 72.0  | 105.2 | 107.9 |
|    | 18.1  | 156.1 | 17.4  | 156.0 | 17.9  | 156.1 | 157.8 |
|    | 55.6  | 120.9 | 54.4  | 121.3 | 55.0  | 121.2 | 120.6 |
|    | 42.6  | 133.0 | 41.8  | 133.1 | 42.5  | 133.0 | 135.0 |
|    | 48.9  | 127.2 | 47.9  | 127.4 | 48.5  | 127.4 | 124.5 |
|    | 39.7  | 135.8 | 38.8  | 135.9 | 39.4  | 135.9 | 136.6 |
|    | 62.2  | 114.7 | 60.9  | 115.2 | 61.6  | 115.0 | 114.9 |
|    | 22.4  | 152.1 | 21.7  | 152.0 | 22.2  | 152.1 | 152.5 |
|    | 15.4  | 158.6 | 14.8  | 158.4 | 15.3  | 158.6 | 157.8 |
|    | 73.1  | 104.5 | 71.9  | 104.9 | 72.5  | 104.8 | 107.7 |
|    | 36.5  | 138.8 | 35.6  | 138.9 | 36.1  | 139.0 | 136.8 |

|           |       |       |       |       |       |       |       |
|-----------|-------|-------|-------|-------|-------|-------|-------|
|           | 61.3  | 115.6 | 60.3  | 115.8 | 60.9  | 115.7 | 119.3 |
|           | 57.6  | 119.0 | 56.5  | 119.4 | 57.1  | 119.3 | 118.9 |
|           | 20.9  | 153.5 | 20.2  | 153.3 | 20.7  | 153.5 | 155.9 |
|           | 81.4  | 96.7  | 80.3  | 97.1  | 80.8  | 97.0  | 101.7 |
|           | 21.5  | 152.9 | 20.7  | 152.8 | 21.3  | 153.0 | 155.5 |
|           | 60.6  | 116.2 | 59.4  | 116.6 | 60.1  | 116.5 | 116.4 |
|           | 36.0  | 139.3 | 35.2  | 139.3 | 35.6  | 139.5 | 134.7 |
|           | 147.5 | 34.6  | 146.8 | 34.7  | 147.2 | 34.5  | 34.7  |
|           | 139.8 | 41.9  | 139.5 | 41.5  | 139.6 | 41.7  | 44.0  |
|           | 134.2 | 47.2  | 133.7 | 47.0  | 133.7 | 47.2  | 48.9  |
|           | 169.2 | 14.3  | 168.6 | 14.4  | 168.7 | 14.4  | 19.2  |
|           | 121.1 | 59.5  | 120.8 | 59.1  | 121.0 | 59.2  | 61.0  |
|           | 161.8 | 21.3  | 160.9 | 21.5  | 161.3 | 21.3  | 22.1  |
|           | 127.6 | 53.3  | 127.2 | 53.1  | 127.4 | 53.2  | 56.9  |
|           | 128.3 | 52.7  | 128.0 | 52.4  | 128.1 | 52.5  | 56.9  |
|           | 161.9 | 21.1  | 161.2 | 21.3  | 161.6 | 21.1  | 22.2  |
|           | 163.9 | 19.3  | 163.2 | 19.3  | 163.5 | 19.3  | 19.7  |
|           | 161.9 | 21.2  | 161.4 | 21.1  | 161.6 | 21.0  | 20.8  |
| <b>12</b> | 117.2 | 63.1  | 116.5 | 63.1  | 117.0 | 63.0  | 65.7  |
|           | 127.9 | 53.0  | 127.0 | 53.3  | 127.3 | 53.3  | 51.3  |
|           | 131.8 | 49.4  | 131.0 | 49.5  | 131.3 | 49.5  | 48.1  |
|           | 135.1 | 46.3  | 134.3 | 46.4  | 134.7 | 46.4  | 45.9  |
|           | 144.1 | 37.8  | 143.3 | 38.1  | 143.5 | 38.0  | 37.9  |
|           | 128.9 | 52.1  | 128.3 | 52.1  | 128.6 | 52.1  | 53.9  |
|           | 119.4 | 61.1  | 118.7 | 61.1  | 119.0 | 61.0  | 60.6  |
|           | 163.8 | 19.4  | 163.1 | 19.4  | 163.4 | 19.3  | 18.9  |
|           | 147.9 | 34.3  | 147.4 | 34.2  | 147.6 | 34.2  | 30.8  |
|           | 100.4 | 78.9  | 100.0 | 78.5  | 100.1 | 78.8  | 79.1  |
|           | -40.1 | 210.7 | -41.1 | 210.7 | -40.1 | 210.7 | 206.1 |
|           | 145.2 | 36.8  | 144.3 | 37.1  | 144.8 | 36.9  | 36.4  |
|           | 99.4  | 79.8  | 98.9  | 79.6  | 99.1  | 79.8  | 80.3  |
|           | 103.0 | 76.4  | 102.3 | 76.4  | 102.7 | 76.4  | 77.8  |
|           | 167.4 | 15.9  | 166.6 | 16.2  | 166.9 | 16.1  | 17.6  |
|           | 115.5 | 64.7  | 114.9 | 64.6  | 115.2 | 64.7  | 65.3  |
|           | 162.0 | 21.0  | 161.4 | 21.1  | 161.6 | 21.0  | 21.4  |
|           | 6.2   | 167.3 | 5.5   | 167.1 | 6.7   | 166.7 | 166.6 |
|           | 146.7 | 35.4  | 146.0 | 35.5  | 146.2 | 35.5  | 35.6  |
|           | 164.4 | 18.8  | 163.7 | 18.9  | 163.9 | 18.9  | 20.7  |
|           | 155.2 | 27.4  | 154.5 | 27.5  | 154.8 | 27.4  | 30.2  |
|           | 54.5  | 121.9 | 53.5  | 122.2 | 54.1  | 122.1 | 120.0 |
|           | 3.9   | 169.4 | 3.1   | 169.3 | 4.2   | 169.0 | 169.1 |
|           | 65.6  | 111.5 | 64.6  | 111.7 | 65.1  | 111.7 | 109.7 |
|           | 35.5  | 139.7 | 34.8  | 139.6 | 35.5  | 139.6 | 141.1 |
|           | 32.9  | 142.2 | 32.2  | 142.1 | 32.8  | 142.2 | 143.2 |
| <b>13</b> | 117.1 | 63.2  | 116.7 | 62.9  | 117.0 | 63.0  | 62.9  |
|           | 129.4 | 51.6  | 128.9 | 51.5  | 128.9 | 51.7  | 53.5  |
|           | 138.2 | 43.4  | 137.6 | 43.3  | 137.9 | 43.3  | 41.4  |
|           | 93.7  | 85.2  | 93.5  | 84.6  | 93.7  | 84.8  | 82.7  |
|           | 116.3 | 63.9  | 116.1 | 63.5  | 116.2 | 63.7  | 65.4  |
|           | 154.8 | 27.8  | 154.1 | 27.9  | 154.4 | 27.8  | 29.2  |

|           |       |       |       |       |       |       |       |
|-----------|-------|-------|-------|-------|-------|-------|-------|
|           | 158.6 | 24.2  | 158.1 | 24.1  | 158.2 | 24.3  | 23.3  |
|           | 141.4 | 40.3  | 141.2 | 40.0  | 141.3 | 40.1  | 37.3  |
|           | 31.4  | 143.6 | 30.5  | 143.7 | 31.1  | 143.7 | 133.9 |
|           | 22.6  | 151.8 | 22.0  | 151.7 | 22.6  | 151.7 | 146.5 |
|           | 123.0 | 57.6  | 122.8 | 57.2  | 122.9 | 57.4  | 53.8  |
|           | 24.1  | 150.5 | 23.3  | 150.4 | 23.9  | 150.5 | 141.5 |
|           | 122.8 | 57.8  | 122.3 | 57.7  | 122.6 | 57.7  | 52.0  |
|           | 54.4  | 122.0 | 53.6  | 122.1 | 54.2  | 122.0 | 122.7 |
|           | 69.3  | 108.0 | 68.4  | 108.2 | 68.9  | 108.1 | 103.8 |
|           | 56.8  | 119.8 | 56.0  | 119.8 | 56.7  | 119.7 | 117.7 |
|           | 57.6  | 119.0 | 56.7  | 119.2 | 57.2  | 119.2 | 117.2 |
|           | 50.3  | 125.9 | 49.3  | 126.0 | 49.9  | 126.1 | 128.2 |
|           | 168.9 | 14.6  | 168.1 | 14.8  | 168.4 | 14.6  | 13.3  |
|           | 145.8 | 36.3  | 145.0 | 36.4  | 145.4 | 36.2  | 35.1  |
| <b>14</b> | 153.6 | 29.0  | 152.8 | 29.1  | 153.0 | 29.1  | 28.5  |
|           | 146.6 | 35.5  | 145.7 | 35.7  | 146.1 | 35.6  | 37.2  |
|           | 77.3  | 100.6 | 76.9  | 100.2 | 77.2  | 100.4 | 102.6 |
|           | 147.5 | 34.7  | 146.9 | 34.7  | 147.2 | 34.6  | 36.2  |
|           | 59.9  | 116.9 | 58.9  | 117.1 | 59.4  | 117.1 | 116.8 |
|           | 66.1  | 111.0 | 64.9  | 111.4 | 65.7  | 111.2 | 117.5 |
|           | 57.7  | 118.9 | 56.9  | 119.0 | 57.5  | 118.9 | 122.9 |
|           | 33.6  | 141.6 | 32.7  | 141.6 | 33.2  | 141.8 | 133.7 |
|           | 62.6  | 114.4 | 61.4  | 114.7 | 62.2  | 114.5 | 113.4 |
|           | 21.6  | 152.8 | 21.0  | 152.6 | 21.4  | 152.8 | 154.5 |
|           | 21.0  | 153.3 | 20.5  | 153.0 | 20.9  | 153.3 | 155.0 |
|           | 18.3  | 155.9 | 17.5  | 155.8 | 18.1  | 156.0 | 156.7 |
|           | 48.2  | 127.8 | 47.3  | 127.9 | 47.8  | 128.0 | 127.9 |
|           | 159.4 | 23.5  | 158.7 | 23.6  | 159.1 | 23.4  | 23.9  |
|           | 72.7  | 104.8 | 71.6  | 105.1 | 72.4  | 104.9 | 105.0 |
|           | 77.0  | 100.8 | 75.8  | 101.2 | 76.4  | 101.1 | 104.6 |
|           | 17.4  | 156.7 | 16.7  | 156.6 | 17.3  | 156.7 | 159.9 |
|           | 44.3  | 131.4 | 43.4  | 131.6 | 44.0  | 131.6 | 130.3 |
|           | 75.0  | 102.7 | 73.9  | 103.0 | 74.5  | 102.9 | 105.4 |
|           | 45.8  | 130.1 | 44.7  | 130.4 | 45.3  | 130.4 | 131.1 |
|           | 71.3  | 106.2 | 70.1  | 106.6 | 70.8  | 106.4 | 109.9 |
|           | 18.0  | 156.2 | 17.3  | 156.0 | 17.8  | 156.3 | 157.9 |
|           | 76.9  | 100.9 | 75.7  | 101.4 | 76.3  | 101.2 | 103.9 |
|           | 73.1  | 104.5 | 71.9  | 104.9 | 72.6  | 104.7 | 107.1 |
|           | 15.7  | 158.3 | 15.0  | 158.2 | 15.5  | 158.4 | 157.7 |
|           | 20.6  | 153.7 | 19.9  | 153.6 | 20.5  | 153.7 | 156.7 |
|           | 76.4  | 101.4 | 75.3  | 101.7 | 76.0  | 101.5 | 102.2 |
|           | 54.5  | 121.9 | 53.3  | 122.3 | 53.9  | 122.3 | 122.5 |
|           | 20.0  | 154.3 | 19.3  | 154.2 | 19.8  | 154.4 | 153.3 |
|           | 54.6  | 121.9 | 53.6  | 122.0 | 54.2  | 122.0 | 122.0 |
|           | 82.9  | 95.2  | 81.7  | 95.7  | 82.4  | 95.5  | 98.4  |
|           | 66.7  | 110.5 | 65.7  | 110.7 | 66.2  | 110.7 | 113.4 |
|           | 19.4  | 154.8 | 18.7  | 154.7 | 19.2  | 155.0 | 157.5 |
| <b>15</b> | 138.1 | 43.5  | 137.3 | 43.6  | 137.6 | 43.5  | 45.9  |
|           | 85.4  | 92.9  | 85.0  | 92.7  | 85.3  | 92.8  | 89.4  |
|           | 90.9  | 87.8  | 90.3  | 87.7  | 90.7  | 87.7  | 84.6  |

|    |       |       |       |       |       |       |       |
|----|-------|-------|-------|-------|-------|-------|-------|
|    | 134.7 | 46.7  | 133.9 | 46.8  | 134.3 | 46.7  | 46.8  |
|    | 92.3  | 86.4  | 91.8  | 86.3  | 92.1  | 86.4  | 76.5  |
|    | 171.6 | 12.1  | 170.9 | 12.2  | 171.1 | 12.1  | 12.1  |
|    | 2.1   | 171.1 | 1.4   | 170.9 | 2.6   | 170.6 | 170.5 |
|    | 45.8  | 130.1 | 44.6  | 130.4 | 45.2  | 130.5 | 130.0 |
|    | 44.0  | 131.8 | 43.0  | 131.9 | 43.6  | 132.0 | 130.0 |
|    | 46.6  | 129.3 | 45.6  | 129.5 | 46.2  | 129.6 | 128.5 |
|    | 43.5  | 132.3 | 42.5  | 132.4 | 43.0  | 132.5 | 133.1 |
|    | 1.9   | 171.3 | 1.2   | 171.1 | 2.3   | 170.8 | 169.7 |
|    | 159.2 | 23.7  | 158.3 | 24.0  | 158.6 | 23.9  | 20.6  |
|    | 2.6   | 170.6 | 2.1   | 170.3 | 3.1   | 170.0 | 166.2 |
|    | 162.1 | 20.9  | 161.2 | 21.2  | 161.7 | 21.0  | 22.1  |
|    | 103.0 | 76.4  | 102.5 | 76.2  | 102.9 | 76.2  | 71.2  |
|    | 44.0  | 131.8 | 43.1  | 131.9 | 43.7  | 131.9 | 133.9 |
|    | 158.8 | 24.1  | 158.0 | 24.3  | 158.4 | 24.1  | 20.5  |
|    | 42.7  | 133.0 | 42.0  | 132.9 | 42.6  | 132.9 | 124.1 |
|    | 1.1   | 172.1 | 0.5   | 171.8 | 1.6   | 171.5 | 169.0 |
|    | 164.3 | 18.9  | 163.3 | 19.3  | 163.7 | 19.0  | 13.7  |
|    | 143.5 | 38.4  | 142.8 | 38.5  | 143.1 | 38.4  | 39.9  |
|    | 145.3 | 36.7  | 144.5 | 36.9  | 144.8 | 36.8  | 39.2  |
|    | 92.2  | 86.5  | 91.9  | 86.2  | 92.1  | 86.3  | 74.3  |
|    | 158.4 | 24.4  | 157.8 | 24.5  | 158.1 | 24.3  | 24.1  |
|    | 156.9 | 25.9  | 156.2 | 25.9  | 156.6 | 25.8  | 25.5  |
|    | 2.9   | 170.3 | 2.2   | 170.1 | 3.3   | 169.8 | 170.0 |
|    | 165.1 | 18.1  | 164.2 | 18.4  | 164.5 | 18.3  | 15.2  |
|    | 95.7  | 83.3  | 94.9  | 83.4  | 95.3  | 83.3  | 74.1  |
|    | -31.2 | 202.3 | -32.0 | 202.2 | -31.0 | 202.1 | 197.5 |
|    | 35.0  | 140.2 | 34.1  | 140.3 | 34.8  | 140.2 | 132.1 |
|    | 4.2   | 169.1 | 3.6   | 168.9 | 4.6   | 168.6 | 170.2 |
|    | 163.9 | 19.3  | 163.0 | 19.6  | 163.3 | 19.5  | 20.5  |
|    | 31.9  | 143.2 | 31.3  | 142.9 | 31.8  | 143.1 | 136.9 |
|    | 159.5 | 23.4  | 158.7 | 23.6  | 159.1 | 23.3  | 20.5  |
| 16 | 6.2   | 167.2 | 5.6   | 167.0 | 6.6   | 166.8 | 169.3 |
|    | 49.4  | 126.7 | 48.3  | 127.0 | 48.9  | 127.0 | 125.3 |
|    | 119.0 | 61.4  | 118.6 | 61.2  | 118.8 | 61.3  | 63.9  |
|    | 112.5 | 67.5  | 111.9 | 67.4  | 112.2 | 67.5  | 66.8  |
|    | 111.6 | 68.3  | 111.2 | 68.1  | 111.3 | 68.3  | 69.5  |
|    | 86.6  | 91.8  | 86.3  | 91.4  | 86.5  | 91.6  | 90.7  |
|    | 103.9 | 75.5  | 103.4 | 75.3  | 103.6 | 75.5  | 76.9  |
|    | 105.2 | 74.4  | 104.7 | 74.2  | 104.9 | 74.3  | 75.0  |
|    | 4.6   | 168.7 | 4.2   | 168.3 | 5.1   | 168.2 | 169.6 |
|    | 50.9  | 125.3 | 49.8  | 125.6 | 50.4  | 125.6 | 124.8 |
|    | 69.8  | 107.5 | 68.8  | 107.8 | 69.5  | 107.6 | 107.7 |
|    | 31.9  | 143.1 | 31.0  | 143.2 | 31.6  | 143.3 | 145.1 |
|    | 39.1  | 136.4 | 38.1  | 136.5 | 38.7  | 136.6 | 136.3 |
|    | 34.3  | 140.8 | 33.6  | 140.8 | 34.2  | 140.8 | 144.2 |
|    | 60.7  | 116.1 | 59.5  | 116.5 | 60.1  | 116.5 | 115.0 |
|    | 3.8   | 169.5 | 3.4   | 169.1 | 4.3   | 168.9 | 170.5 |
|    | 49.7  | 126.4 | 48.7  | 126.7 | 49.2  | 126.7 | 125.1 |
|    | 62.9  | 114.0 | 61.8  | 114.4 | 62.4  | 114.3 | 113.7 |

|    |       |       |       |       |       |       |       |
|----|-------|-------|-------|-------|-------|-------|-------|
|    | 35.3  | 139.9 | 34.4  | 140.0 | 35.0  | 140.1 | 144.1 |
|    | 43.6  | 132.2 | 42.6  | 132.3 | 43.2  | 132.3 | 135.9 |
|    | 34.1  | 141.1 | 33.2  | 141.1 | 33.8  | 141.2 | 145.1 |
|    | 71.7  | 105.8 | 70.6  | 106.1 | 71.3  | 106.0 | 107.2 |
|    | 4.9   | 168.5 | 4.4   | 168.2 | 5.3   | 168.0 | 170.0 |
|    | 50.2  | 126.0 | 49.1  | 126.3 | 49.6  | 126.3 | 125.2 |
|    | 69.9  | 107.4 | 68.9  | 107.7 | 69.6  | 107.6 | 108.3 |
|    | 31.6  | 143.4 | 30.8  | 143.4 | 31.3  | 143.5 | 145.1 |
|    | 39.8  | 135.7 | 38.8  | 135.9 | 39.4  | 135.9 | 136.0 |
|    | 34.4  | 140.8 | 33.6  | 140.7 | 34.3  | 140.7 | 144.2 |
|    | 60.0  | 116.8 | 58.8  | 117.1 | 59.4  | 117.1 | 115.1 |
|    | 61.1  | 115.8 | 60.0  | 116.1 | 60.6  | 116.0 | 113.9 |
|    | 34.9  | 140.3 | 34.0  | 140.4 | 34.7  | 140.4 | 144.1 |
|    | 43.4  | 132.4 | 42.4  | 132.5 | 43.1  | 132.5 | 136.0 |
|    | 33.9  | 141.3 | 33.0  | 141.3 | 33.6  | 141.4 | 145.1 |
|    | 70.8  | 106.6 | 69.8  | 106.8 | 70.4  | 106.8 | 107.2 |
| 17 | 113.3 | 66.7  | 112.6 | 66.8  | 112.9 | 66.9  | 70.8  |
|    | 104.0 | 75.5  | 103.8 | 75.0  | 103.9 | 75.3  | 78.9  |
|    | 88.7  | 89.8  | 88.4  | 89.4  | 88.7  | 89.6  | 93.7  |
|    | 101.7 | 77.6  | 101.3 | 77.3  | 101.5 | 77.5  | 83.1  |
|    | 106.4 | 73.2  | 106.1 | 72.9  | 106.2 | 73.1  | 77.8  |
|    | 81.6  | 96.5  | 81.5  | 95.9  | 81.7  | 96.1  | 105.9 |
|    | 105.7 | 73.9  | 105.4 | 73.5  | 105.5 | 73.8  | 77.6  |
|    | 109.0 | 70.8  | 108.4 | 70.7  | 108.7 | 70.8  | 70.7  |
|    | 103.2 | 76.2  | 102.8 | 75.9  | 103.1 | 76.0  | 77.7  |
|    | 106.6 | 73.0  | 106.2 | 72.8  | 106.5 | 72.8  | 75.9  |
|    | -2.4  | 175.3 | -3.0  | 175.0 | -2.0  | 174.8 | 175.8 |
|    | 148.1 | 34.1  | 147.2 | 34.4  | 147.5 | 34.3  | 32.2  |
|    | 149.7 | 32.6  | 149.0 | 32.6  | 149.3 | 32.6  | 32.2  |
|    | 106.3 | 73.3  | 105.9 | 73.1  | 106.0 | 73.3  | 71.5  |
|    | 106.5 | 73.2  | 105.7 | 73.3  | 105.9 | 73.4  | 75.4  |
|    | 105.7 | 73.8  | 105.3 | 73.6  | 105.4 | 73.8  | 76.3  |
|    | 154.8 | 27.8  | 154.1 | 27.9  | 154.5 | 27.7  | 29.3  |
|    | 78.0  | 99.9  | 77.6  | 99.5  | 77.8  | 99.8  | 100.5 |
|    | -48.3 | 218.4 | -49.0 | 218.1 | -47.9 | 218.0 | 213.7 |
|    | 152.2 | 30.3  | 151.4 | 30.4  | 151.8 | 30.2  | 32.7  |
|    | 111.0 | 68.9  | 110.5 | 68.7  | 110.6 | 69.0  | 70.9  |
|    | 152.5 | 29.9  | 152.1 | 29.8  | 152.1 | 29.9  | 34.3  |
|    | 115.2 | 65.0  | 114.8 | 64.7  | 115.0 | 64.9  | 63.4  |
|    | 170.9 | 12.7  | 170.3 | 12.7  | 170.5 | 12.7  | 13.1  |
|    | 8.6   | 165.0 | 7.9   | 164.9 | 8.9   | 164.6 | 167.8 |
|    | 46.7  | 129.2 | 45.5  | 129.6 | 46.0  | 129.8 | 132.1 |
|    | 45.6  | 130.3 | 44.6  | 130.5 | 45.2  | 130.4 | 130.8 |
|    | 47.6  | 128.4 | 46.5  | 128.6 | 47.0  | 128.7 | 129.9 |
|    | 41.6  | 134.1 | 40.6  | 134.2 | 41.1  | 134.3 | 134.4 |
|    | 47.7  | 128.3 | 46.7  | 128.5 | 47.2  | 128.6 | 129.9 |
|    | 45.9  | 130.0 | 45.0  | 130.1 | 45.5  | 130.2 | 130.8 |
|    | 117.0 | 63.3  | 116.5 | 63.1  | 116.7 | 63.3  | 62.0  |
|    | 120.5 | 60.0  | 120.1 | 59.8  | 120.2 | 60.0  | 62.3  |
| 18 | 23.2  | 151.3 | 22.5  | 151.2 | 23.0  | 151.3 | 142.8 |

|    |       |       |       |       |       |       |       |
|----|-------|-------|-------|-------|-------|-------|-------|
|    | 145.5 | 36.6  | 144.7 | 36.7  | 145.1 | 36.5  | 35.1  |
|    | 102.1 | 77.2  | 101.6 | 77.1  | 101.8 | 77.2  | 76.3  |
|    | 124.4 | 56.3  | 123.5 | 56.5  | 123.9 | 56.5  | 53.4  |
|    | -40.2 | 210.8 | -41.0 | 210.6 | -40.0 | 210.6 | 204.3 |
|    | 47.5  | 128.4 | 46.6  | 128.6 | 47.3  | 128.5 | 127.1 |
|    | 105.1 | 74.5  | 104.6 | 74.2  | 105.0 | 74.2  | 72.3  |
|    | 155.6 | 27.0  | 154.9 | 27.1  | 155.3 | 27.0  | 26.6  |
|    | 146.9 | 35.2  | 146.0 | 35.5  | 146.4 | 35.3  | 38.2  |
|    | 150.7 | 31.7  | 149.9 | 31.9  | 150.1 | 31.8  | 29.8  |
|    | 73.4  | 104.2 | 73.1  | 103.8 | 73.3  | 104.1 | 106.8 |
|    | -34.3 | 205.2 | -35.0 | 205.0 | -34.0 | 204.9 | 209.8 |
|    | 122.7 | 57.9  | 121.9 | 58.1  | 122.1 | 58.2  | 53.8  |
|    | 96.7  | 82.3  | 96.2  | 82.1  | 96.3  | 82.4  | 80.4  |
|    | 98.7  | 80.4  | 98.1  | 80.3  | 98.4  | 80.4  | 78.5  |
|    | 157.9 | 24.9  | 157.1 | 25.1  | 157.3 | 25.0  | 25.7  |
|    | 157.6 | 25.2  | 156.9 | 25.3  | 157.1 | 25.2  | 24.7  |
|    | 150.5 | 31.8  | 149.7 | 32.0  | 150.0 | 32.0  | 30.4  |
|    | 128.8 | 52.2  | 128.2 | 52.2  | 128.3 | 52.4  | 49.3  |
|    | 119.9 | 60.6  | 119.5 | 60.3  | 119.7 | 60.5  | 60.4  |
|    | 146.0 | 36.0  | 145.3 | 36.2  | 145.5 | 36.2  | 31.2  |
|    | 101.8 | 77.5  | 101.3 | 77.3  | 101.5 | 77.5  | 76.3  |
|    | 95.8  | 83.1  | 95.3  | 83.0  | 95.6  | 83.1  | 80.6  |
|    | 0.0   | 173.1 | -0.7  | 172.9 | 0.5   | 172.5 | 171.8 |
|    | 1.3   | 171.9 | 0.5   | 171.8 | 1.7   | 171.3 | 167.3 |
|    | 164.8 | 18.4  | 164.1 | 18.5  | 164.5 | 18.3  | 21.6  |
|    | 153.5 | 29.0  | 152.8 | 29.1  | 153.2 | 29.0  | 24.4  |
|    | 168.8 | 14.7  | 168.1 | 14.8  | 168.3 | 14.7  | 13.2  |
| 19 | 18.4  | 155.8 | 17.8  | 155.6 | 18.4  | 155.7 | 157.4 |
|    | 85.4  | 92.9  | 84.3  | 93.3  | 84.8  | 93.2  | 96.5  |
|    | 17.3  | 156.8 | 16.6  | 156.7 | 17.1  | 156.9 | 155.5 |
|    | 79.8  | 98.2  | 78.5  | 98.7  | 79.3  | 98.4  | 100.3 |
|    | 19.0  | 155.2 | 18.5  | 154.9 | 19.1  | 155.0 | 153.8 |
|    | 79.1  | 98.9  | 78.0  | 99.2  | 78.6  | 99.1  | 106.7 |
|    | 154.6 | 28.0  | 153.9 | 28.1  | 154.2 | 28.0  | 28.6  |
|    | 119.7 | 60.7  | 119.3 | 60.5  | 119.5 | 60.6  | 66.1  |
|    | 103.2 | 76.2  | 102.7 | 76.1  | 103.1 | 76.1  | 79.0  |
|    | 46.6  | 129.4 | 45.5  | 129.6 | 46.1  | 129.7 | 130.4 |
|    | 64.0  | 113.0 | 63.0  | 113.3 | 63.6  | 113.2 | 115.8 |
|    | 53.6  | 122.8 | 52.5  | 123.0 | 53.2  | 123.0 | 120.3 |
|    | 63.9  | 113.1 | 62.8  | 113.4 | 63.4  | 113.4 | 115.1 |
|    | 33.9  | 141.3 | 32.9  | 141.4 | 33.5  | 141.4 | 145.1 |
|    | 32.4  | 142.6 | 31.5  | 142.7 | 32.1  | 142.8 | 145.1 |
|    | 149.5 | 32.8  | 148.6 | 33.1  | 149.1 | 32.8  | 36.5  |
|    | 111.9 | 68.0  | 111.5 | 67.8  | 111.7 | 67.9  | 72.6  |
|    | 76.1  | 101.7 | 74.9  | 102.1 | 75.7  | 101.8 | 100.3 |
|    | 17.6  | 156.6 | 17.1  | 156.2 | 17.6  | 156.4 | 155.6 |
|    | 100.7 | 78.6  | 100.2 | 78.4  | 100.5 | 78.5  | 76.6  |
|    | 16.4  | 157.6 | 15.8  | 157.4 | 16.4  | 157.6 | 158.0 |
|    | 85.4  | 92.9  | 84.3  | 93.3  | 84.8  | 93.2  | 96.3  |
|    | 17.2  | 156.9 | 16.5  | 156.7 | 17.0  | 157.0 | 157.2 |

|    |       |       |       |       |       |       |       |
|----|-------|-------|-------|-------|-------|-------|-------|
|    | 85.1  | 93.2  | 84.0  | 93.6  | 84.6  | 93.4  | 95.9  |
|    | 45.6  | 130.3 | 44.5  | 130.6 | 45.1  | 130.6 | 132.0 |
|    | 60.6  | 116.2 | 59.5  | 116.5 | 60.0  | 116.5 | 119.0 |
|    | 64.5  | 112.5 | 63.5  | 112.7 | 64.1  | 112.7 | 115.1 |
|    | 31.6  | 143.4 | 30.7  | 143.5 | 31.2  | 143.6 | 145.1 |
|    | 64.2  | 112.8 | 63.2  | 113.1 | 63.7  | 113.0 | 115.3 |
|    | 33.4  | 141.7 | 32.5  | 141.8 | 33.1  | 141.9 | 145.1 |
| 20 | 119.1 | 61.4  | 118.7 | 61.0  | 118.8 | 61.2  | 60.1  |
|    | 156.1 | 26.6  | 155.5 | 26.6  | 155.7 | 26.6  | 26.9  |
|    | 149.4 | 32.8  | 148.7 | 32.9  | 149.1 | 32.8  | 31.7  |
|    | 133.2 | 48.1  | 132.4 | 48.3  | 132.7 | 48.2  | 48.2  |
|    | 118.4 | 61.9  | 117.9 | 61.8  | 118.2 | 61.9  | 60.1  |
|    | 30.9  | 144.0 | 30.3  | 143.9 | 30.8  | 144.0 | 142.2 |
|    | 59.2  | 117.5 | 58.2  | 117.7 | 58.8  | 117.7 | 116.3 |
|    | 46.8  | 129.1 | 45.9  | 129.3 | 46.4  | 129.3 | 128.8 |
|    | 52.0  | 124.3 | 51.0  | 124.5 | 51.6  | 124.5 | 124.4 |
|    | 52.7  | 123.6 | 51.8  | 123.7 | 52.4  | 123.7 | 122.8 |
|    | 39.6  | 135.9 | 38.6  | 136.1 | 39.2  | 136.1 | 132.9 |
|    | 128.7 | 52.3  | 127.9 | 52.4  | 128.1 | 52.5  | 52.3  |
|    | 138.7 | 42.9  | 138.3 | 42.7  | 138.5 | 42.8  | 42.7  |
|    | 131.0 | 50.1  | 130.8 | 49.7  | 130.9 | 49.9  | 50.3  |
|    | 129.0 | 52.0  | 128.6 | 51.8  | 128.8 | 51.8  | 52.9  |
|    | 25.3  | 149.3 | 24.4  | 149.3 | 25.1  | 149.4 | 140.0 |
|    | 44.5  | 131.3 | 43.9  | 131.1 | 44.5  | 131.1 | 127.9 |
|    | 116.2 | 64.0  | 115.8 | 63.8  | 116.0 | 63.9  | 64.8  |
|    | 101.3 | 78.0  | 100.9 | 77.8  | 101.1 | 77.9  | 77.6  |
|    | 138.6 | 43.0  | 138.0 | 43.0  | 138.3 | 42.9  | 42.8  |
|    | 1.2   | 171.9 | 0.6   | 171.7 | 1.6   | 171.5 | 170.3 |
| 21 | 48.8  | 127.2 | 47.9  | 127.4 | 48.4  | 127.4 | 128.0 |
|    | 51.5  | 124.8 | 50.5  | 124.9 | 51.1  | 124.9 | 125.3 |
|    | 53.8  | 122.6 | 52.9  | 122.7 | 53.5  | 122.6 | 122.3 |
|    | 31.3  | 143.7 | 30.5  | 143.7 | 31.0  | 143.8 | 137.4 |
|    | 34.8  | 140.4 | 34.2  | 140.2 | 34.7  | 140.3 | 141.4 |
|    | 60.4  | 116.4 | 59.4  | 116.6 | 60.1  | 116.5 | 117.9 |
|    | 126.8 | 54.1  | 126.1 | 54.1  | 126.2 | 54.3  | 52.8  |
|    | 119.2 | 61.2  | 118.6 | 61.1  | 118.9 | 61.2  | 63.7  |
|    | 2.3   | 170.9 | 1.9   | 170.5 | 2.9   | 170.3 | 167.7 |
|    | 135.3 | 46.1  | 134.4 | 46.3  | 134.8 | 46.2  | 47.8  |
|    | 127.1 | 53.8  | 126.6 | 53.6  | 126.8 | 53.7  | 57.5  |
|    | 135.3 | 46.1  | 134.5 | 46.2  | 134.9 | 46.1  | 39.0  |
|    | 137.9 | 43.6  | 137.6 | 43.3  | 137.8 | 43.4  | 36.5  |
|    | 122.3 | 58.3  | 122.1 | 57.9  | 122.2 | 58.1  | 54.1  |
|    | 112.7 | 67.3  | 112.5 | 66.9  | 112.5 | 67.1  | 66.3  |
|    | 162.2 | 20.9  | 161.6 | 20.9  | 161.6 | 21.0  | 23.8  |
|    | 152.5 | 30.0  | 151.8 | 30.0  | 152.1 | 30.0  | 29.3  |
|    | 169.3 | 14.2  | 168.7 | 14.3  | 169.0 | 14.1  | 13.7  |
|    | 54.8  | 121.7 | 54.1  | 121.6 | 54.7  | 121.5 | 117.7 |
|    | 27.1  | 147.6 | 26.3  | 147.6 | 26.9  | 147.7 | 140.5 |
|    | 123.0 | 57.7  | 122.5 | 57.5  | 122.7 | 57.6  | 52.3  |
|    | 113.2 | 66.8  | 112.7 | 66.7  | 113.0 | 66.7  | 69.5  |



|    |       |       |       |       |       |       |       |
|----|-------|-------|-------|-------|-------|-------|-------|
|    | 131.7 | 49.4  | 131.1 | 49.5  | 131.2 | 49.6  | 47.9  |
|    | 111.3 | 68.6  | 110.8 | 68.5  | 111.1 | 68.5  | 69.4  |
|    | 22.7  | 151.7 | 22.1  | 151.5 | 22.7  | 151.6 | 150.0 |
|    | 127.9 | 53.0  | 127.1 | 53.2  | 127.4 | 53.2  | 51.8  |
|    | 39.8  | 135.7 | 38.9  | 135.8 | 39.5  | 135.8 | 134.3 |
|    | 71.1  | 106.4 | 70.2  | 106.5 | 70.8  | 106.4 | 108.3 |
|    | 48.9  | 127.2 | 48.0  | 127.3 | 48.5  | 127.3 | 128.2 |
|    | 59.1  | 117.6 | 58.2  | 117.7 | 58.8  | 117.7 | 119.8 |
|    | 53.5  | 122.9 | 52.6  | 122.9 | 53.3  | 122.9 | 122.2 |
|    | 151.9 | 30.6  | 151.1 | 30.7  | 151.5 | 30.5  | 27.7  |
|    | 152.9 | 29.6  | 152.3 | 29.6  | 152.5 | 29.5  | 28.5  |
|    | 117.9 | 62.5  | 117.3 | 62.3  | 117.7 | 62.3  | 61.7  |
|    | 127.3 | 53.6  | 127.2 | 53.1  | 127.2 | 53.4  | 53.7  |
|    | 140.3 | 41.4  | 139.8 | 41.3  | 140.1 | 41.3  | 41.2  |
|    | 122.3 | 58.3  | 122.0 | 58.0  | 122.1 | 58.2  | 58.1  |
|    | 35.5  | 139.7 | 34.6  | 139.8 | 35.3  | 139.7 | 133.8 |
|    | 53.4  | 122.9 | 52.7  | 122.9 | 53.3  | 122.9 | 122.2 |
|    | 170.7 | 12.9  | 169.9 | 13.1  | 170.2 | 12.9  | 13.0  |
| 22 | 141.5 | 40.3  | 140.6 | 40.5  | 140.9 | 40.5  | 40.0  |
|    | 31.0  | 144.0 | 30.4  | 143.8 | 30.9  | 143.9 | 143.4 |
|    | 76.4  | 101.3 | 75.4  | 101.7 | 76.0  | 101.5 | 102.7 |
|    | 48.7  | 127.4 | 47.7  | 127.6 | 48.3  | 127.5 | 129.9 |
|    | 61.5  | 115.4 | 60.3  | 115.7 | 61.2  | 115.4 | 118.0 |
|    | 41.5  | 134.1 | 40.7  | 134.2 | 41.1  | 134.3 | 136.5 |
|    | 159.4 | 23.5  | 158.8 | 23.5  | 158.9 | 23.5  | 27.9  |
|    | 154.6 | 28.0  | 153.9 | 28.1  | 154.2 | 28.0  | 27.3  |
|    | 25.8  | 148.8 | 25.2  | 148.7 | 25.7  | 148.8 | 146.8 |
|    | -14.8 | 187.0 | -15.7 | 187.0 | -14.8 | 186.9 | 188.3 |
|    | 20.9  | 153.4 | 19.9  | 153.6 | 20.5  | 153.7 | 147.1 |
|    | 39.5  | 136.0 | 38.4  | 136.3 | 39.2  | 136.1 | 135.2 |
|    | 24.6  | 150.0 | 23.7  | 150.0 | 24.4  | 150.0 | 153.8 |
|    | 57.8  | 118.8 | 57.0  | 118.9 | 57.6  | 118.8 | 119.7 |
|    | 67.0  | 110.2 | 66.0  | 110.5 | 66.6  | 110.3 | 111.5 |
|    | 68.4  | 108.9 | 67.4  | 109.1 | 68.0  | 109.1 | 108.3 |
|    | -11.2 | 183.5 | -12.1 | 183.6 | -11.2 | 183.5 | 184.4 |
|    | 154.6 | 28.0  | 153.8 | 28.2  | 153.9 | 28.2  | 28.8  |
|    | 48.1  | 128.0 | 47.1  | 128.1 | 47.7  | 128.2 | 128.0 |
|    | 58.1  | 118.6 | 57.1  | 118.8 | 57.6  | 118.8 | 119.6 |
|    | 55.9  | 120.7 | 54.9  | 120.8 | 55.5  | 120.8 | 121.8 |
|    | 40.1  | 135.4 | 39.3  | 135.4 | 39.9  | 135.5 | 137.3 |
|    | 53.7  | 122.7 | 53.1  | 122.5 | 53.7  | 122.5 | 127.6 |
|    | 62.6  | 114.3 | 61.8  | 114.4 | 62.4  | 114.3 | 111.6 |
|    | 55.6  | 120.9 | 54.8  | 120.9 | 55.3  | 120.9 | 122.5 |
|    | 56.3  | 120.2 | 55.5  | 120.3 | 56.1  | 120.2 | 120.8 |
|    | 66.1  | 111.0 | 65.1  | 111.3 | 65.7  | 111.2 | 112.6 |
|    | 36.1  | 139.2 | 35.2  | 139.2 | 35.7  | 139.4 | 133.4 |
|    | 57.6  | 119.0 | 56.7  | 119.2 | 57.2  | 119.2 | 120.5 |
|    | 55.0  | 121.5 | 54.1  | 121.6 | 54.6  | 121.7 | 122.6 |
|    | 158.3 | 24.5  | 157.5 | 24.7  | 157.8 | 24.6  | 25.8  |
|    | 167.9 | 15.5  | 167.2 | 15.6  | 167.4 | 15.5  | 17.8  |

|    |       |       |       |       |       |       |       |
|----|-------|-------|-------|-------|-------|-------|-------|
| 23 | 135.6 | 45.9  | 135.1 | 45.7  | 135.3 | 45.7  | 46.9  |
|    | 120.1 | 60.3  | 119.7 | 60.1  | 119.9 | 60.2  | 55.1  |
|    | 150.0 | 32.3  | 149.5 | 32.2  | 149.7 | 32.2  | 30.2  |
|    | 106.7 | 72.9  | 106.5 | 72.5  | 106.6 | 72.8  | 71.1  |
|    | 4.2   | 169.1 | 3.5   | 169.0 | 4.5   | 168.8 | 171.6 |
|    | 129.3 | 51.7  | 128.8 | 51.6  | 128.9 | 51.8  | 52.9  |
|    | 143.2 | 38.7  | 142.6 | 38.6  | 142.8 | 38.7  | 41.4  |
|    | 27.1  | 147.6 | 26.5  | 147.4 | 27.3  | 147.3 | 154.6 |
|    | 128.7 | 52.3  | 128.3 | 52.0  | 128.4 | 52.2  | 49.3  |
|    | 136.1 | 45.3  | 135.6 | 45.3  | 135.9 | 45.2  | 37.3  |
|    | 148.4 | 33.8  | 147.9 | 33.7  | 148.2 | 33.7  | 23.7  |
|    | -0.5  | 173.5 | -1.0  | 173.2 | -0.1  | 173.0 | 172.0 |
|    | 9.0   | 164.6 | 8.4   | 164.4 | 9.2   | 164.3 | 168.1 |
|    | 3.0   | 170.2 | 2.4   | 170.0 | 3.4   | 169.8 | 172.4 |
|    | 128.5 | 52.5  | 127.9 | 52.5  | 128.1 | 52.6  | 55.4  |
|    | 151.3 | 31.1  | 150.9 | 30.9  | 151.1 | 30.9  | 29.8  |
|    | 68.8  | 108.5 | 67.8  | 108.7 | 68.4  | 108.7 | 105.9 |
|    | 123.6 | 57.1  | 123.1 | 56.9  | 123.3 | 57.1  | 57.0  |
|    | -1.9  | 174.8 | -2.5  | 174.6 | -1.5  | 174.4 | 173.6 |
|    | 137.3 | 44.2  | 137.0 | 43.9  | 137.1 | 44.1  | 40.0  |
|    | 120.5 | 60.0  | 120.0 | 59.8  | 120.1 | 60.0  | 63.3  |
|    | 1.3   | 171.8 | 0.7   | 171.6 | 1.6   | 171.4 | 173.1 |
|    | 115.7 | 64.5  | 115.2 | 64.3  | 115.4 | 64.5  | 60.0  |
|    | 48.3  | 127.7 | 47.6  | 127.6 | 48.1  | 127.8 | 135.9 |
|    | 24.8  | 149.7 | 24.1  | 149.7 | 24.9  | 149.5 | 157.5 |

<sup>[a]</sup> Parameters of linear regression models are presented in Table 2 in main text.

<sup>[b]</sup> For the references to the experimental works, please, see the main text.
